# Supplementary material
Source: publisher figshare collection journal article supplement (https://acs.figshare.com/ndownloader/files/3716644)
Supplement: Supplementary file 1 [file 3716644]

## Sheet: Table S1
Supplemental Table S1: The identified SSG-sites with treatment by SiO2 ENPs
All peptides identifications with peptide MSGF spectra probability values and other parameters were listed in Table S9
Columns E to J are abundance of the Cys-sites from each biological replicate based on the Log2 tranformation of TMT reporter ion intensities
Column O lists Log2 fold change
The symbol * represents oxidation of methionine, # stands for NEM alkylation of Cys, and for those Cys sites without modifications are glutathionylated sites (SSG sites)
UniProt ID	Protein Name	SSG Site	Representative Peptide	Untreated Rep1	Untreated Rep2	Untreated Rep3	SiO2-treated Rep1	SiO2-treated Rep2	SiO2-treated Rep3	Average Untreated	Std dev Untreated	Average SiO2-treated	Std dev SiO2-treated	Fold Change	p Value
1433E_MOUSE	14-3-3 protein epsilon	1433E_MOUSE_Cys97	K.LICC#DILDVLDK.H	15.5054	16.0467	15.6987	15.8621	15.5649	15.6296	15.7502	0.223999	15.6855	0.127646	-0.0647185	0.740514
1433E_MOUSE	14-3-3 protein epsilon	1433E_MOUSE_Cys98	K.LIC#CDILDVLDKHLIPAANTGESK.V	16.6101	15.744	16.4712	16.965	16.7363	16.7808	16.2751	0.379788	16.8274	0.0990203	0.5523	0.117442
1433F_MOUSE	14-3-3 protein eta	1433F_MOUSE_Cys112	K.NCNDFQYESK.V	17.8031	17.6283	17.7709	17.2786	17.3799	17.1855	17.7341	0.0759808	17.2813	0.0794058	-0.452761	0.00432322
1433F_MOUSE	14-3-3 protein eta	1433F_MOUSE_Cys97	K.ELETVCNDVLALLDK.F	18.858	18.8153	18.9234	18.8345	18.7665	18.6922	18.8656	0.0444664	18.7644	0.0581254	-0.101222	0.122108
1433G_MOUSE	14-3-3 protein gamma	1433G_MOUSE_Cys112	K.NCSETQYESK.V	15.6021	15.4379	15.2611	14.7937	15.0332	14.8639	15.4337	0.139226	14.8969	0.100499	-0.536754	0.0115042
1433T_MOUSE	14-3-3 protein theta	1433T_MOUSE_Cys25	R.YDDM*ATCMK.A	17.7634	17.8292	17.7315	17.4856	17.5955	17.4842	17.7747	0.0406542	17.5218	0.0521175	-0.252955	0.00564647
1433Z_MOUSE	14-3-3 protein zeta/delta	1433Z_MOUSE_Cys25	R.YDDM*AACMK.S	18.6781	18.8449	18.832	18.6438	18.5819	18.5728	18.785	0.0757635	18.5995	0.0315592	-0.185486	0.0330231
1433Z_MOUSE	14-3-3 protein zeta/delta	1433Z_MOUSE_Cys94	R.DICNDVLSLLEK.F	20.6615	20.6571	20.788	20.493	20.6305	20.4494	20.7022	0.0607112	20.5243	0.0771647	-0.177938	0.0624428
2AAA_MOUSE	Serine/threonine-protein phosphatase 2A 65 kDa regulatory subunit A alpha isoform	2AAA_MOUSE_Cys174	R.NLCSDDTPMVR.R	18.7704	18.7415	18.8865	18.5528	18.4466	18.4164	18.7995	0.062691	18.4719	0.0584891	-0.327529	0.00568312
2ABA_MOUSE	Serine/threonine-protein phosphatase 2A 55 kDa regulatory subunit B alpha isoform	2ABA_MOUSE_Cys398	R.KVCASGK.R	14.8776	14.905	14.9829	14.8101	14.7316	14.6428	14.9218	0.0446061	14.7282	0.0683611	-0.193686	0.0284189
6PGD_MOUSE	6-phosphogluconate dehydrogenase, decarboxylating	6PGD_MOUSE_Cys170	K.VGTGEPCCDWVGDEGAGHFVK.M	18.2227	17.823	18.5142	18.1749	17.848	18.1947	18.1866	0.283303	18.0725	0.158989	-0.114131	0.645371
6PGD_MOUSE	6-phosphogluconate dehydrogenase, decarboxylating	6PGD_MOUSE_Cys171	K.VGTGEPC#CDWVGDEGAGHFVK.M	18.6996	18.6951	18.8454	18.9831	18.6025	18.4993	18.7467	0.0698336	18.695	0.208035	-0.0517613	0.755451
6PGD_MOUSE	6-phosphogluconate dehydrogenase, decarboxylating	6PGD_MOUSE_Cys289	R.CLSSLKEER.V	22.5588	22.6156	22.535	22.1507	22.232	22.1975	22.5698	0.0338126	22.1934	0.0333302	-0.376433	0.00036028
6PGD_MOUSE	6-phosphogluconate dehydrogenase, decarboxylating	6PGD_MOUSE_Cys422	R.VISTGVQAGIPMPCFTTALSFYDGYR.H	18.6658	18.2501	18.479	18.4072	18.4869	18.0618	18.465	0.170025	18.3186	0.184492	-0.146365	0.455714
AAAT_MOUSE	Neutral amino acid transporter B(0)	AAAT_MOUSE_Cys216	K.DNSCKIPQSCIQR.E	21.7018	21.8787	22.0828	21.9365	21.9594	21.8241	21.8877	0.155665	21.9067	0.0591422	0.0189654	0.879848
AAAT_MOUSE	Neutral amino acid transporter B(0)	AAAT_MOUSE_Cys222	K.IPQSCIQR.E	22.2056	22.3247	22.4972	22.3492	22.3672	22.2714	22.3425	0.119724	22.3293	0.0415768	-0.0132542	0.889579
AAAT_MOUSE	Neutral amino acid transporter B(0)	AAAT_MOUSE_Cys479	R.SCTVLNVEGDAFGAGLLQSYVDR.T	16.6733	16.6772	16.4399	16.0697	16.5256	16.2875	16.5968	0.11094	16.2943	0.186152	-0.302549	0.119558
AATM_MOUSE	Aspartate aminotransferase, mitochondrial	AATM_MOUSE_Cys106	K.NLDKEYLPIGGLAEFCK.A	21.4125	21.5951	21.6359	21.3373	21.3488	21.2517	21.5479	0.0971207	21.3126	0.0432788	-0.235256	0.0352177
ABCD1_MOUSE	ATP-binding cassette sub-family D member 1	ABCD1_MOUSE_Cys39	R.QCLTPAR.G	16.2148	16.2528	16.2815	16.0803	16.1983	16.1374	16.2497	0.0273206	16.1387	0.0481616	-0.111021	0.0470789
ABCE1_MOUSE	ATP-binding cassette sub-family E member 1	ABCE1_MOUSE_Cys29	K.KSCPVVR.M	19.1259	19.0297	19.004	18.8965	18.9461	18.7596	19.0532	0.0524546	18.8674	0.0788756	-0.185777	0.0501461
ABCE1_MOUSE	ATP-binding cassette sub-family E member 1	ABCE1_MOUSE_Cys475	R.VALALCLGKPADVYLIDEPSAYLDSEQR.L	15.3252	15.6633	15.5677	15.3173	15.428	15.0131	15.5187	0.142278	15.2528	0.175424	-0.265926	0.171239
ABCF2_MOUSE	ATP-binding cassette sub-family F member 2	ABCF2_MOUSE_Cys591	R.LIQQVAQEIWVCEK.Q	16.1891	16.2515	16.5583	16.4724	16.7536	16.4992	16.333	0.16135	16.5751	0.126694	0.242089	0.170465
ACAD9_MOUSE	Acyl-CoA dehydrogenase family member 9, mitochondrial	ACAD9_MOUSE_Cys617	K.RAYICAHPLDR.A	13.8694	14.2256	13.8697	13.9304	13.5664	13.862	13.9882	0.167846	13.7863	0.15796	-0.201934	0.283071
ACATN_MOUSE	Acetyl-coenzyme A transporter 1	ACATN_MOUSE_Cys497	R.TPDAIELCK.K	20.503	20.3375	20.5743	20.4307	20.3627	20.4194	20.4716	0.0991945	20.4043	0.0297671	-0.0673387	0.40985
ACBD5_MOUSE	Acyl-CoA-binding domain-containing protein 5	ACBD5_MOUSE_Cys86	K.QATEGPCK.L	15.0482	15.062	15.1613	14.7425	14.6703	14.7668	15.0905	0.0503825	14.7265	0.0409733	-0.363973	0.00137129
ACLY_MOUSE	ATP-citrate synthase	ACLY_MOUSE_Cys20	K.YICTTSAIQNR.F	19.133	18.9979	19.2367	18.8749	19.019	18.7665	19.1225	0.0977774	18.8868	0.103424	-0.235766	0.0791483
ACLY_MOUSE	ATP-citrate synthase	ACLY_MOUSE_Cys509	R.AVQGMLDFDYVCSR.D	18.8978	18.9321	18.9877	18.9247	18.8019	18.8321	18.9392	0.0370738	18.8529	0.0522354	-0.0863421	0.129299
ACOC_MOUSE	Cytoplasmic aconitate hydratase	ACOC_MOUSE_Cys392	K.KDFESCLGAK.Q	19.9189	19.7098	19.5723	19.5692	19.5502	19.3626	19.7337	0.142512	19.494	0.093247	-0.239701	0.11739
ACON_MOUSE	Aconitate hydratase, mitochondrial	ACON_MOUSE_Cys385	R.VGLIGSCTNSSYEDMGR.S	21.3442	21.2277	20.8013	20.5443	20.9698	20.6667	21.1244	0.233365	20.7269	0.178829	-0.397489	0.128451
ACON_MOUSE	Aconitate hydratase, mitochondrial	ACON_MOUSE_Cys410	K.QALAHGLKCK.S	15.9354	16.1573	16.2118	16.0494	15.9184	15.4519	16.1015	0.119529	15.8066	0.256454	-0.294929	0.214458
ACON_MOUSE	Aconitate hydratase, mitochondrial	ACON_MOUSE_Cys448	R.DVGGIVLANACGPCIGQWDRK.D	20.632	20.7257	20.6123	20.7152	20.6505	20.4473	20.6567	0.0494341	20.6043	0.114138	-0.0523663	0.58363
ACON_MOUSE	Aconitate hydratase, mitochondrial	ACON_MOUSE_Cys451	R.DVGGIVLANAC#GPCIGQWDR.K	20.6806	20.6304	20.4919	20.5519	20.5068	20.3601	20.6009	0.0797736	20.4729	0.0818582	-0.128009	0.188405
ACTB_MOUSE	Actin, cytoplasmic 1	ACTB_MOUSE_Cys217	K.LCYVALDFEQEMATAASSSSLEK.S	21.6473	21.7376	21.9011	21.865	21.9302	21.8211	21.762	0.105023	21.8721	0.0448404	0.110073	0.244516
ACTB_MOUSE	Actin, cytoplasmic 1	ACTB_MOUSE_Cys374	K.QEYDESGPSIVHRKCF.-	15.5457	15.43	15.3437	15.5681	15.6272	15.5057	15.4398	0.0827545	15.567	0.0496025	0.127192	0.135713
ACTN1_MOUSE	Alpha-actinin-1	ACTN1_MOUSE_Cys154	K.EGLLLWCQR.K	20.4994	20.3194	20.6485	20.6873	20.6671	20.4461	20.4891	0.134517	20.6002	0.109244	0.111073	0.415955
ACTN1_MOUSE	Alpha-actinin-1	ACTN1_MOUSE_Cys41	K.TFTAWCNSHLR.K	16.4583	16.226	16.2425	16.0893	16.1024	16.0396	16.309	0.105834	16.0771	0.0270491	-0.231846	0.0398803
ADA17_MOUSE	Disintegrin and metalloproteinase domain-containing protein 17	ADA17_MOUSE_Cys365	R.ANSHGGVCPK.A	18.8383	18.7135	18.6136	18.3743	18.542	18.3127	18.7218	0.0918978	18.4097	0.0969029	-0.31212	0.0297886
ADA17_MOUSE	Disintegrin and metalloproteinase domain-containing protein 17	ADA17_MOUSE_Cys469	K.AQECFQER.S	17.9434	18.017	17.9735	17.9129	17.7818	17.9002	17.978	0.0302375	17.865	0.0590289	-0.112973	0.0736382
ADAS_MOUSE	Alkyldihydroxyacetonephosphate synthase, peroxisomal	ADAS_MOUSE_Cys391	K.YGSVAFPNFEQGVACLR.E	18.0443	18.1437	18.1989	17.7232	17.8738	17.7277	18.129	0.0639619	17.7749	0.0699531	-0.354091	0.00615755
ADPGK_MOUSE	ADP-dependent glucokinase	ADPGK_MOUSE_Cys415	R.VAGTQACATETIDTNR.V	16.4542	16.4537	16.2965	16.1591	16.1109	16.0459	16.4015	0.0742259	16.1053	0.0463597	-0.296205	0.008733
ADT1_MOUSE	ADP/ATP translocase 1	ADT1_MOUSE_Cys129	R.YFAGNLASGGAAGATSLCFVYPLDFAR.T	17.1055	17.6436	19.0874	17.7178	18.9949	17.7216	17.9455	0.836798	18.1448	0.60115	0.199258	0.798015
ADT2_MOUSE	ADP/ATP translocase 2	ADT2_MOUSE_Cys160	K.GLGDCLVK.I	23.5407	23.7618	23.8871	23.6019	23.5627	23.4771	23.7299	0.143213	23.5472	0.0520945	-0.182624	0.16537
ADT2_MOUSE	ADP/ATP translocase 2	ADT2_MOUSE_Cys257	K.GTDIMYTGTLDCWR.K	22.2774	21.9867	22.3001	22.1748	22.0287	21.9547	22.1881	0.142678	22.0528	0.0914497	-0.135275	0.322074
AGK_MOUSE	Acylglycerol kinase, mitochondrial	AGK_MOUSE_Cys72	K.ATVFLNPAACK.G	18.2474	18.1951	18.0773	18.0083	18.0743	17.8615	18.1733	0.0711432	17.9814	0.0889205	-0.191899	0.0757313
AGO2_MOUSE	Protein argonaute-2	AGO2_MOUSE_Cys236	K.AQPVIEFVCEVLDFK.S	15.6877	15.666	15.8512	15.9548	16.1336	15.924	15.735	0.082679	16.0042	0.0924152	0.26918	0.0372949
AIMP1_MOUSE	Aminoacyl tRNA synthase complex-interacting multifunctional protein 1	AIMP1_MOUSE_Cys209	R.MVVLLCNLKPAK.M	18.8378	18.4182	18.3955	18.1682	18.5347	18.3027	18.5505	0.203375	18.3352	0.151359	-0.215314	0.295968
AIMP1_MOUSE	Aminoacyl tRNA synthase complex-interacting multifunctional protein 1	AIMP1_MOUSE_Cys227	R.GVLSQAMVMCASSPEKVEILAPPNGSVPGDR.I	20.8175	20.7253	20.1293	20.4333	20.6098	20.3969	20.5574	0.305015	20.48	0.0929577	-0.0773924	0.748695
AIMP1_MOUSE	Aminoacyl tRNA synthase complex-interacting multifunctional protein 1	AIMP1_MOUSE_Cys282	K.IWEQIQPDLHTNAECVATYK.G	17.2751	17.3261	17.2638	17.1651	17.1541	17.1618	17.2883	0.0271097	17.1603	0.00462372	-0.127994	0.00275863
AIMP2_MOUSE	Aminoacyl tRNA synthase complex-interacting multifunctional protein 2	AIMP2_MOUSE_Cys306	K.SCENLAPFSTALQLLK.-	18.3252	17.9409	18.6718	18.1947	18.3087	18.2473	18.3126	0.298526	18.2502	0.0465945	-0.0624224	0.784679
ALD2_MOUSE	Aldose reductase-related protein 2	ALD2_MOUSE_Cys200	K.LIQYCHSK.G	20.6816	20.5871	20.5536	20.4519	20.4263	20.3046	20.6075	0.0542023	20.3942	0.0642502	-0.213222	0.0230184
ALDH2_MOUSE	Aldehyde dehydrogenase, mitochondrial	ALDH2_MOUSE_Cys68	R.KTFPTVNPSTGEVICQVAEGNKEDVDK.A	14.8689	15.2737	15.4844	14.5262	13.965	14.0733	15.209	0.255428	14.1882	0.24306	-1.02085	0.0149199
ALDOA_MOUSE	Fructose-bisphosphate aldolase A	ALDOA_MOUSE_Cys178	L.ARYASICQQNGIVPIVEPEILPDGDHDLK.R	16.6292	16.2765	16.0393	16.4875	17.6076	15.6403	16.315	0.24236	16.5784	0.805701	0.263403	0.68084
ALDOA_MOUSE	Fructose-bisphosphate aldolase A	ALDOA_MOUSE_Cys202	R.CQYVTEK.V	22.9945	22.8554	22.7183	22.2657	22.4107	22.3063	22.856	0.11276	22.3275	0.0610766	-0.528507	0.00431721
ALDOA_MOUSE	Fructose-bisphosphate aldolase A	ALDOA_MOUSE_Cys240	N.MVTPGHACTQK.F	19.8791	19.7234	19.615	19.5809	19.5251	19.4833	19.7392	0.108378	19.5298	0.0399558	-0.209399	0.0623901
ALDOA_MOUSE	Fructose-bisphosphate aldolase A	ALDOA_MOUSE_Cys290	K.CPLLKPWALTFSYGR.A	21.2916	20.8164	20.799	20.424	20.589	20.382	20.969	0.228207	20.465	0.0893333	-0.504017	0.0437433
ALDOA_MOUSE	Fructose-bisphosphate aldolase A	ALDOA_MOUSE_Cys339	K.RALANSLACQGK.Y	22.8153	22.8562	22.9271	22.7499	22.5906	22.6466	22.8662	0.0461879	22.6624	0.0659781	-0.203872	0.02317
ALDOA_MOUSE	Fructose-bisphosphate aldolase A	ALDOA_MOUSE_Cys73	R.VNPCIGGVILFHETLYQK.A	17.3198	17.5588	17.427	18.0401	17.7098	17.5057	17.4352	0.0977491	17.7519	0.220195	0.31664	0.136603
ALDR_MOUSE	Aldose reductase	ALDR_MOUSE_Cys187	K.YKPAVNQIECHPYLTQEK.L	12.2403	11.9286	11.8903	11.6267	11.5411	11.2563	12.0197	0.15676	11.4747	0.158308	-0.545006	0.0258278
ALDR_MOUSE	Aldose reductase	ALDR_MOUSE_Cys200	K.LIEYCHSK.G	16.7875	16.7378	16.4057	16.6208	16.9239	16.3703	16.6437	0.169511	16.6383	0.226325	-0.00534364	0.979959
ALDR_MOUSE	Aldose reductase	ALDR_MOUSE_Cys45	R.HIDCAQVYQNEK.E	19.4722	19.5	19.4224	19.2925	19.2785	19.2346	19.4649	0.0321046	19.2686	0.0246643	-0.196329	0.00236673
ALDR_MOUSE	Aldose reductase	ALDR_MOUSE_Cys81	K.LWCTFHDK.S	17.4699	17.4304	17.3212	17.0867	16.9382	17.0166	17.4072	0.0628911	17.0138	0.0606473	-0.393338	0.00312042
AMPB_MOUSE	Aminopeptidase B	AMPB_MOUSE_Cys151	R.VGEGPGVCWLAPEQTAGK.K	19.5047	19.2781	19.1505	19.242	18.9683	19.101	19.3111	0.146476	19.1037	0.111765	-0.207381	0.186646
AMPB_MOUSE	Aminopeptidase B	AMPB_MOUSE_Cys369	R.ISTILFGAAYTCLEAATGR.A	15.4487	15.6644	15.6346	15.3985	15.5907	15.3935	15.5826	0.0954417	15.4609	0.0918289	-0.12165	0.263778
AMPL_MOUSE	Cytosol aminopeptidase	AMPL_MOUSE_Cys376	R.LILADALCYAHTFNPK.V	15.1687	14.89	15.1886	14.3999	14.4274	14.4842	15.0824	0.136303	14.4372	0.0350879	-0.64523	0.00291786
AMPL_MOUSE	Cytosol aminopeptidase	AMPL_MOUSE_Cys462	R.SAGACTAAAFLR.E	19.0681	19.0185	19.2331	18.8202	18.829	18.8551	19.1066	0.0917185	18.8348	0.0148253	-0.27178	0.0144128
AN32B_MOUSE	Acidic leucine-rich nuclear phosphoprotein 32 family member B	AN32B_MOUSE_Cys123	K.SLDLFGCEVTNR.S	20.3219	20.4187	20.2451	20.2214	20.2287	20.3215	20.3286	0.0710408	20.2572	0.0455793	-0.0713625	0.297857
AN32E_MOUSE	Acidic leucine-rich nuclear phosphoprotein 32 family member E	AN32E_MOUSE_Cys87	R.KLELSDNIISGGLEVLAEKCPNLTYLNLSGNK.I	19.016	19.03	18.9816	18.8529	19.0494	18.829	19.0092	0.0203387	18.9104	0.0987477	-0.0987944	0.238066
ANLN_MOUSE	Actin-binding protein anillin	ANLN_MOUSE_Cys328	R.KPCEKPTLSQGAQPK.E	15.0743	14.8946	14.8285	14.4505	14.4826	14.6699	14.9325	0.103885	14.5343	0.0967588	-0.398134	0.0165931
ANM1_MOUSE	Protein arginine N-methyltransferase 1	ANM1_MOUSE_Cys119	K.VIGIECSSISDYAVK.I	14.2427	13.2622	13.7458	13.203	13.6732	13.7118	13.7502	0.400304	13.5293	0.23128	-0.220906	0.536252
ANM1_MOUSE	Protein arginine N-methyltransferase 1	ANM1_MOUSE_Cys250	K.QLVTNACLIK.E	20.9333	20.9994	21.0563	20.8012	20.7938	20.7958	20.9963	0.0502592	20.7969	0.00312123	-0.199413	0.00499097
ANM5_MOUSE	Protein arginine N-methyltransferase 5	ANM5_MOUSE_Cys196	R.TLCDYSK.R	20.0969	20.1197	20.0949	19.7972	19.9579	19.9305	20.1038	0.0112413	19.8952	0.0701724	-0.208621	0.014243
ANR17_MOUSE	Ankyrin repeat domain-containing protein 17	ANR17_MOUSE_Cys1154	R.TKDTPLSLACSGGR.Q	19.4672	19.2703	19.2095	19.2649	19.2575	19.2527	19.3157	0.109991	19.2584	0.00500628	-0.0573038	0.502546
ANXA1_MOUSE	Annexin A1	ANXA1_MOUSE_Cys263	K.CLTTIVK.C	21.7439	21.8121	21.8094	21.3869	21.3621	21.405	21.7885	0.0315229	21.3847	0.0176059	-0.403781	9.34002e-05
ANXA1_MOUSE	Annexin A1	ANXA1_MOUSE_Cys270	K.CATSTPAFFAEK.L	12.5857	13.3033	12.9549	12.2452	12.3089	12.4991	12.948	0.293018	12.3511	0.107865	-0.596899	0.0538986
ANXA1_MOUSE	Annexin A1	ANXA1_MOUSE_Cys324	K.YGISLCQAILDETKGDYEK.I	19.5877	19.6914	19.7959	19.5278	19.419	19.4236	19.6917	0.0849931	19.4568	0.0502311	-0.234838	0.0282017
ANXA2_MOUSE	Annexin A2	ANXA2_MOUSE_Cys133	K.GLGTDEDSLIEIICSR.T	18.2053	18.2784	18.5982	18.2984	18.331	18.2924	18.3606	0.170593	18.3073	0.016975	-0.0533534	0.682584
ANXA2_MOUSE	Annexin A2	ANXA2_MOUSE_Cys223	R.SVCHLQK.V	21.0097	20.8539	21.3529	20.9293	21.0291	21.1227	21.0722	0.20848	21.0271	0.0789579	-0.045114	0.788942
ANXA7_MOUSE	Annexin A7	ANXA7_MOUSE_Cys273	R.CYQLEFGR.D	18.697	18.5526	18.5697	18.4223	18.3173	18.1454	18.6064	0.0644153	18.295	0.114132	-0.311422	0.0282902
AP1B1_MOUSE	AP-1 complex subunit beta-1	AP1B1_MOUSE_Cys144	K.TAAVCVAK.L	20.9871	21.1068	21.2389	20.9066	20.9541	20.9106	21.1109	0.102871	20.9238	0.0215244	-0.18718	0.0654478
AP1B1_MOUSE	AP-1 complex subunit beta-1	AP1B1_MOUSE_Cys863	R.DCPLNTEAASNK.L	15.6098	15.6244	15.195	15.0261	15.2562	14.9876	15.4764	0.199044	15.09	0.11857	-0.386423	0.0777688
AP2A1_MOUSE	AP-2 complex subunit alpha-1	AP2A1_MOUSE_Cys283	R.LVECLETVLNK.A	15.7327	15.7607	16.16	15.7719	15.7292	15.9821	15.8845	0.195126	15.8277	0.110542	-0.0567659	0.738457
AP2A1_MOUSE	AP-2 complex subunit alpha-1	AP2A1_MOUSE_Cys331	R.ACNQLGQFLQHR.E	15.1244	14.5721	15.1035	14.7582	15.1943	14.6235	14.9333	0.25556	14.8587	0.24358	-0.0746726	0.779747
AP2A1_MOUSE	AP-2 complex subunit alpha-1	AP2A1_MOUSE_Cys492	K.TVFEALQAPACHENMVK.V	13.6403	14.5526	13.9291	13.3166	13.0649	13.9486	14.0407	0.380717	13.4434	0.37175	-0.597275	0.187614
AP2M1_MOUSE	AP-2 complex subunit mu	AP2M1_MOUSE_Cys337	R.IPTPLNTSGVQVICMK.G	19.4383	19.1688	19.4974	19.0622	19.1728	19.1827	19.3682	0.143019	19.1392	0.0546368	-0.228927	0.101956
AP4A_MOUSE	Bis(5'-nucleosyl)-tetraphosphatase [asymmetrical]	AP4A_MOUSE_Cys123	R.WLGLEEACQLAQFK.E	16.5875	16.469	17.0226	16.7154	16.684	16.3881	16.693	0.238025	16.5958	0.147447	-0.097231	0.649081
APEX1_MOUSE	DNA-(apurinic or apyrimidinic site) lyase	APEX1_MOUSE_Cys207	R.KPLVLCGDLNVAHEEIDLR.N	18.0635	18.0951	18.6345	18.4519	18.1506	18.338	18.2644	0.262078	18.3135	0.124245	0.0491588	0.822347
APT_MOUSE	Adenine phosphoribosyltransferase	APT_MOUSE_Cys83	R.GFLFGPSLAQELGVGCVLIR.K	17.748	17.6881	17.7644	17.6209	17.4418	17.4535	17.7335	0.0327706	17.5054	0.0817946	-0.228112	0.0215591
ARC1B_MOUSE	Actin-related protein 2/3 complex subunit 1B	ARC1B_MOUSE_Cys26	R.TQIAICPNNHEVHIYEK.S	18.4326	18.2865	18.7863	18.3882	18.8265	18.6038	18.5018	0.209836	18.6061	0.178963	0.104361	0.62091
ARFG2_MOUSE	ADP-ribosylation factor GTPase-activating protein 2	ARFG2_MOUSE_Cys26	K.ACFDC#GAK.S	20.5464	20.4379	20.7576	20.5228	20.2998	20.2281	20.5806	0.132748	20.3502	0.125495	-0.230386	0.149066
ARHG6_MOUSE	Rho guanine nucleotide exchange factor 6	ARHG6_MOUSE_Cys552	K.GPTSCGSLSK.T	18.5688	18.4139	18.6449	18.1933	18.1728	18.1889	18.5425	0.0961357	18.185	0.0088174	-0.357549	0.00634989
ARL8A_MOUSE	ADP-ribosylation factor-like protein 8A	ARL8A_MOUSE_Cys159	R.EIC#CYSISC#K.E	19.5756	19.2737	19.5804	19.1011	19.386	19.2329	19.4766	0.143441	19.24	0.116414	-0.236584	0.144359
ARL8A_MOUSE	ADP-ribosylation factor-like protein 8A	ARL8A_MOUSE_Cys164	R.EIC#C#YSISCK.E	18.8371	18.6826	18.9539	18.3589	18.6481	18.5275	18.8245	0.111093	18.5115	0.118619	-0.313014	0.0527788
ARP3_MOUSE	Actin-related protein 3	ARP3_MOUSE_Cys12	R.LPACVVDCGTGYTK.L	18.1856	18.2249	18.244	18.334	18.193	18.116	18.2182	0.0243108	18.2143	0.0902792	-0.00383632	0.956509
ARP3_MOUSE	Actin-related protein 3	ARP3_MOUSE_Cys189	R.TLTGTVIDSGDGVTHVIPVAEGYVIGSCIK.H	15.7658	15.1625	15.6405	15.4067	15.2406	15.2152	15.5229	0.259943	15.2875	0.0849113	-0.235444	0.290287
ARP3_MOUSE	Actin-related protein 3	ARP3_MOUSE_Cys34	K.LGYAGNTEPQFIIPSCIAIK.E	16.7148	16.6453	16.9054	16.7527	16.7418	16.7267	16.7552	0.109927	16.7404	0.0106648	-0.0147568	0.859325
ARP3_MOUSE	Actin-related protein 3	ARP3_MOUSE_Cys408	K.KDYEEIGPSICR.H	18.5307	18.5638	18.4783	18.4378	18.3543	18.2903	18.5243	0.0352337	18.3608	0.0603867	-0.163445	0.0297616
ARP3_MOUSE	Actin-related protein 3	ARP3_MOUSE_Cys8	R.LPACVVDCGTGYTK.L	20.1246	20.0601	20.1081	20.0881	20.0741	19.9387	20.0976	0.0273406	20.0336	0.0673639	-0.0639614	0.28135
ARSB_MOUSE	Arylsulfatase B	ARSB_MOUSE_Cys406	R.VELLHNIDQDFFDGLPCPG.K	20.2475	20.1047	20.3074	19.6948	19.8061	20.0513	20.2199	0.0850262	19.8508	0.148949	-0.369107	0.038269
ARSB_MOUSE	Arylsulfatase B	ARSB_MOUSE_Cys448	K.LLTGHPGCGYWFPPPS.Q	18.7316	18.8806	18.789	18.5902	18.5503	18.6139	18.8004	0.0613364	18.5848	0.0262506	-0.215584	0.0102629
ASAH1_MOUSE	Acid ceramidase	ASAH1_MOUSE_Cys339	K.CLNHTTQK.N	14.8598	14.8638	14.6945	14.5988	14.5609	14.3804	14.8061	0.0788842	14.5134	0.0953003	-0.292672	0.0286844
ASGL1_MOUSE	Isoaspartyl peptidase/L-asparaginase	ASGL1_MOUSE_Cys179	K.GAQNADCPK.N	15.0827	14.8828	14.9748	14.8725	14.8449	14.8103	14.9801	0.0816914	14.8426	0.0254309	-0.137538	0.0854068
ASNS_MOUSE	Asparagine synthetase [glutamine-hydrolyzing]	ASNS_MOUSE_Cys73	K.YPYLWLCYNGEIYNHK.A	17.104	16.8604	17.1363	16.8625	16.6384	16.6794	17.0336	0.123143	16.7268	0.0974569	-0.30684	0.0506827
ASPH_MOUSE	Aspartyl/asparaginyl beta-hydroxylase	ASPH_MOUSE_Cys624	R.KNENACK.G	15.937	16.1592	15.9481	16.2178	16.1527	16.067	16.0147	0.10222	16.1459	0.0617636	0.131123	0.195457
AT1A1_MOUSE	Sodium/potassium-transporting ATPase subunit alpha-1	AT1A1_MOUSE_Cys249	R.NIAFFSTNCVEGTAR.G	17.6488	17.7526	17.5471	17.6077	17.4823	17.5603	17.6495	0.0839214	17.5501	0.0516929	-0.0994001	0.226959
AT1A1_MOUSE	Sodium/potassium-transporting ATPase subunit alpha-1	AT1A1_MOUSE_Cys374	K.NLEAVETLGSTSTICSDKTGTLTQNR.M	17.2031	17.4347	17.553	17.0543	17.0794	16.9635	17.3969	0.145327	17.0324	0.0498111	-0.36452	0.0284205
AT1A1_MOUSE	Sodium/potassium-transporting ATPase subunit alpha-1	AT1A1_MOUSE_Cys428	R.IAGLCNR.A	21.665	21.6378	22.0354	21.5969	21.6281	21.6039	21.7794	0.181324	21.6096	0.0133867	-0.169768	0.257159
AT1A3_MOUSE	Sodium/potassium-transporting ATPase subunit alpha-3	AT1A3_MOUSE_Cys49	R.KYNTDCVQGLTHSK.A	15.2292	14.9161	15.5226	15.4722	15.4943	14.8308	15.2227	0.247646	15.2657	0.307713	0.043075	0.884901
AT1B3_MOUSE	Sodium/potassium-transporting ATPase subunit beta-3	AT1B3_MOUSE_Cys144	R.ACQFPVSLLEECSGVTDANFGYSK.G	18.372	18.2233	18.3375	18.2584	18.4011	18.0504	18.3109	0.0635471	18.2366	0.144001	-0.0743348	0.540765
AT1B3_MOUSE	Sodium/potassium-transporting ATPase subunit beta-3	AT1B3_MOUSE_Cys154	R.ACQFPVSLLEECSGVTDANFGYSK.G	18.372	18.2233	18.3375	18.2584	18.4011	18.0504	18.3109	0.0635471	18.2366	0.144001	-0.0743348	0.540765
AT1B3_MOUSE	Sodium/potassium-transporting ATPase subunit beta-3	AT1B3_MOUSE_Cys170	K.GQPCILVK.M	23.1519	23.04	22.8679	22.7566	22.9317	22.5976	23.0199	0.116832	22.7619	0.136454	-0.257978	0.11209
AT1B3_MOUSE	Sodium/potassium-transporting ATPase subunit beta-3	AT1B3_MOUSE_Cys191	R.IIDLIPDGYPQISCLPK.E	19.5215	19.8456	19.3961	19.3356	19.4659	19.1946	19.5877	0.189364	19.332	0.110761	-0.255693	0.174634
AT2A1_MOUSE	Sarcoplasmic/endoplasmic reticulum calcium ATPase 1	AT2A1_MOUSE_Cys344	R.SLPSVETLGCTSVICSDK.T	18.5243	18.6486	18.606	18.4141	18.4805	18.5846	18.593	0.0515975	18.4931	0.0701611	-0.0998846	0.180132
AT2A1_MOUSE	Sarcoplasmic/endoplasmic reticulum calcium ATPase 1	AT2A1_MOUSE_Cys349	R.SLPSVETLGCTSVICSDK.T	18.5243	18.6486	18.606	18.4141	18.4805	18.5846	18.593	0.0515975	18.4931	0.0701611	-0.0998846	0.180132
AT2A2_MOUSE	Sarcoplasmic/endoplasmic reticulum calcium ATPase 2	AT2A2_MOUSE_Cys364	K.TGTLTTNQM*SVCR.M	14.9125	15.5687	15.5407	14.641	15.1018	14.9968	15.3406	0.302952	14.9132	0.197196	-0.427442	0.169785
AT2A2_MOUSE	Sarcoplasmic/endoplasmic reticulum calcium ATPase 2	AT2A2_MOUSE_Cys498	K.SMSVYCTPNKPSR.T	18.1339	18.1409	18.4328	18.0201	18.0612	17.9994	18.2359	0.139302	18.0269	0.0256692	-0.208956	0.105279
AT2A2_MOUSE	Sarcoplasmic/endoplasmic reticulum calcium ATPase 2	AT2A2_MOUSE_Cys635	K.GTAVAICR.R	20.1293	20.2506	20.1646	19.9642	19.9791	20.1189	20.1815	0.0509746	20.0207	0.0696989	-0.160756	0.058015
AT2A2_MOUSE	Sarcoplasmic/endoplasmic reticulum calcium ATPase 2	AT2A2_MOUSE_Cys669	R.DACLNAR.C	16.8224	16.8336	17.0189	16.7223	16.6182	16.7246	16.8916	0.0901303	16.6884	0.0496418	-0.203258	0.0491323
AT2A3_MOUSE	Sarcoplasmic/endoplasmic reticulum calcium ATPase 3	AT2A3_MOUSE_Cys471	R.AGACNSVIK.Q	17.9052	17.8687	18.0111	17.7384	17.7443	17.6835	17.9283	0.0603762	17.7221	0.0273515	-0.206254	0.0116852
ATAD1_MOUSE	ATPase family AAA domain-containing protein 1	ATAD1_MOUSE_Cys137	K.GVLLYGPPGCGK.T	13.794	13.8017	13.4939	13.4107	13.58	13.1458	13.6965	0.143328	13.3789	0.178704	-0.317651	0.121416
ATE1_MOUSE	Arginyl-tRNA--protein transferase 1	ATE1_MOUSE_Cys72	K.YVYKPVMDQTC#CPQYTIR.C	16.8472	16.6472	16.8656	16.7521	16.8102	16.7509	16.7867	0.0988991	16.7711	0.0276539	-0.0156178	0.840227
ATP5E_MOUSE	ATP synthase subunit epsilon, mitochondrial	ATP5E_MOUSE_Cys19	R.FSQICAK.A	21.0663	20.9736	21.0051	20.7431	20.8572	20.7478	21.015	0.0385087	20.7827	0.0526907	-0.232287	0.00731522
ATX2_MOUSE	Ataxin-2	ATX2_MOUSE_Cys863	K.RGPEVTSQGVQTSSPACK.Q	14.8596	15.0529	14.8664	15.0246	14.9741	14.6603	14.9263	0.0895537	14.8864	0.161153	-0.0399089	0.774777
BAF_MOUSE	Barrier-to-autointegration factor	BAF_MOUSE_Cys67	K.DTCGANAK.Q	13.9417	13.9783	14.1289	13.8314	13.6114	13.7975	14.0163	0.0809915	13.7467	0.0967155	-0.269555	0.0390904
BASI_MOUSE	Basigin	BASI_MOUSE_Cys203	R.SGEYSCIFLPEPVGR.S	20.6942	20.6185	20.4685	20.4173	20.5502	20.1669	20.5937	0.0937603	20.3781	0.158897	-0.215605	0.173743
BGLR_MOUSE	Beta-glucuronidase	BGLR_MOUSE_Cys165	K.LVQSGPLTTCR.I	19.95	20.0426	20.2452	19.844	20.0187	19.8905	20.0793	0.123299	19.9177	0.0738747	-0.161566	0.18712
BPNT1_MOUSE	3'(2'),5'-bisphosphate nucleotidase 1	BPNT1_MOUSE_Cys243	K.ASAYVFASPGCK.K	19.3283	19.3752	19.452	19.2783	19.2445	19.1668	19.3851	0.0509907	19.2299	0.046665	-0.155246	0.0336527
BRAP_MOUSE	BRCA1-associated protein	BRAP_MOUSE_Cys472	R.KCTQLNTR.V	16.0046	16.0116	15.995	15.7788	15.835	15.6909	16.0037	0.00678567	15.7682	0.0593013	-0.235526	0.00505596
BTK_MOUSE	Tyrosine-protein kinase BTK	BTK_MOUSE_Cys337	R.HYVVCSTPQSQYYLAEK.H	16.5116	16.7194	16.8704	16.6427	16.5904	16.5019	16.7005	0.147064	16.5783	0.0581025	-0.122146	0.336028
C1TC_MOUSE	C-1-tetrahydrofolate synthase, cytoplasmic	C1TC_MOUSE_Cys236	K.GEWIKPGAVVIDCGINYVPDDTKPNGR.K	15.4368	14.7501	15.1877	15.6926	15.9399	15.0995	15.1249	0.283835	15.5773	0.352632	0.452485	0.230358
C1TC_MOUSE	C-1-tetrahydrofolate synthase, cytoplasmic	C1TC_MOUSE_Cys863	K.QGFGNLPICMAK.T	18.5601	18.4342	18.0283	18.1957	18.27	17.9894	18.3409	0.226894	18.1517	0.118709	-0.189164	0.355136
C1TM_MOUSE	Monofunctional C1-tetrahydrofolate synthase, mitochondrial	C1TM_MOUSE_Cys249	K.GSMTMSCPWATPQLPDKLR.E	17.3229	17.4352	17.5056	17.4941	17.2046	17.1445	17.4212	0.0752611	17.2811	0.152622	-0.140141	0.308883
C1TM_MOUSE	Monofunctional C1-tetrahydrofolate synthase, mitochondrial	C1TM_MOUSE_Cys905	R.YTQQGFGNLPICMAK.T	19.2724	19.0499	19.3971	19.1039	19.229	19.372	19.2398	0.143622	19.235	0.109516	-0.00482624	0.971666
C2CD5_MOUSE	C2 domain-containing protein 5	C2CD5_MOUSE_Cys142	R.QSSCGVK.F	15.6582	15.6429	15.8685	15.6497	15.6518	15.5315	15.7232	0.102945	15.611	0.0561922	-0.112213	0.247447
C560_MOUSE	Succinate dehydrogenase cytochrome b560 subunit, mitochondrial	C560_MOUSE_Cys70	K.WSLPMALSVCHR.G	15.5854	15.6529	15.7182	15.7593	15.6502	15.2934	15.6521	0.0542069	15.5677	0.198966	-0.0844737	0.59344
CADM1_MOUSE	Cell adhesion molecule 1	CADM1_MOUSE_Cys270	R.EGDAFELTCEAIGKPQPVMVTWVR.V	20.9333	20.6234	20.4107	20.2146	20.3786	19.9273	20.6558	0.214554	20.1735	0.186517	-0.482342	0.0744038
CADM1_MOUSE	Cell adhesion molecule 1	CADM1_MOUSE_Cys316	R.CEASNIVGK.A	19.0023	18.866	18.253	17.8192	18.1199	18.0083	18.7071	0.325882	17.9825	0.12411	-0.724644	0.0424402
CALR_MOUSE	Calreticulin	CALR_MOUSE_Cys105	K.GQTLVVQFTVKHEQNIDCGGGYVK.L	19.1951	19.1199	18.9847	19.0229	19.0418	18.94	19.0999	0.0870575	19.0016	0.0442203	-0.0983157	0.227569
CALX_MOUSE	Calnexin	CALX_MOUSE_Cys195	K.TPYTIMFGPDKCGEDYKLHFIFR.H	21.0367	20.7934	20.8822	20.8365	20.8465	20.4547	20.9041	0.100521	20.7126	0.182401	-0.191511	0.263313
CAN2_MOUSE	Calpain-2 catalytic subunit	CAN2_MOUSE_Cys240	K.GSLLGCSIDITSAADSEAVTYQK.L	16.6501	16.6626	16.7168	16.6329	16.5811	16.5933	16.6765	0.0289533	16.6024	0.0221382	-0.0740466	0.0453249
CAN2_MOUSE	Calpain-2 catalytic subunit	CAN2_MOUSE_Cys405	R.GCTFLVGLIQK.H	16.2371	16.0078	15.9383	15.73	15.7806	15.5662	16.0611	0.127656	15.6923	0.0914895	-0.368807	0.0293527
CAN2_MOUSE	Calpain-2 catalytic subunit	CAN2_MOUSE_Cys640	K.ALEEAGFKLPCQLHQVIVAR.F	20.7553	20.5717	20.6768	20.4096	20.473	20.6141	20.6679	0.0752026	20.4989	0.0854576	-0.169054	0.103628
CAND1_MOUSE	Cullin-associated NEDD8-dissociated protein 1	CAND1_MOUSE_Cys131	K.TVIGELPPASSGSALAANVCKK.I	16.9778	17.1843	17.1716	16.9079	17.0256	16.8597	17.1112	0.094487	16.9311	0.0696703	-0.18016	0.0957776
CAND1_MOUSE	Cullin-associated NEDD8-dissociated protein 1	CAND1_MOUSE_Cys92	K.VKEYQVETIVDTLCTNMLSDKEQLR.D	15.8922	16.5082	15.7594	16.337	16.3222	16.3275	16.0533	0.326243	16.3289	0.00614461	0.275603	0.298276
CAP1_MOUSE	Adenylyl cyclase-associated protein 1	CAP1_MOUSE_Cys355	K.CVNTTLQIK.G	21.327	21.1977	21.0394	20.8399	20.8184	20.7331	21.1881	0.117611	20.7972	0.0461283	-0.390884	0.0119152
CAP1_MOUSE	Adenylyl cyclase-associated protein 1	CAP1_MOUSE_Cys374	K.GKINSITVDNCK.K	20.7769	20.7219	20.6143	20.4519	20.5121	20.4682	20.7043	0.0675322	20.4774	0.025437	-0.226946	0.0112683
CAP1_MOUSE	Adenylyl cyclase-associated protein 1	CAP1_MOUSE_Cys415	K.TDGCHAYLSK.N	20.0561	20.0334	20.1331	19.9021	19.7539	19.429	20.0742	0.0426388	19.695	0.197585	-0.379196	0.056802
CAP1_MOUSE	Adenylyl cyclase-associated protein 1	CAP1_MOUSE_Cys92	R.ALLATASQCQQPAGNK.L	21.1853	21.0847	21.1686	20.9128	20.9313	20.9561	21.1462	0.0440162	20.9334	0.0177383	-0.212794	0.00316695
CAPG_MOUSE	Macrophage-capping protein	CAPG_MOUSE_Cys77	R.DEQGACAVLAVHLNTLLGERPVQHR.E	16.081	15.9809	17.021	16.1391	16.0411	15.6745	16.361	0.468481	15.9516	0.199985	-0.409386	0.31918
CAPR1_MOUSE	Caprin-1	CAPR1_MOUSE_Cys224	K.EKPVCGTTYK.A	20.4576	20.3593	20.8658	20.7966	20.5694	20.7199	20.5609	0.219304	20.6953	0.0943911	0.13437	0.470645
CASP8_MOUSE	Caspase-8	CASP8_MOUSE_Cys164	K.SICDQVNK.S	15.0833	15.2975	15.0246	15.22	15.4232	15.1924	15.1351	0.117298	15.2785	0.102903	0.143412	0.263519
CATA_MOUSE	Catalase	CATA_MOUSE_Cys377	R.LGPNYLQIPVNCPYR.A	18.8895	18.8524	19.188	19.2226	19.0161	18.9356	18.9766	0.150212	19.0581	0.120892	0.081491	0.582237
CATB_MOUSE	Cathepsin B	CATB_MOUSE_Cys105	R.DQGSCGSCWAFGAVEAISDRTCIHTNGR.V	20.2462	20.0968	20.0842	20.1723	20.133	19.8572	20.1424	0.0735565	20.0541	0.140183	-0.0882827	0.474429
CATB_MOUSE	Cathepsin B	CATB_MOUSE_Cys108	R.DQGSCGSCWAFGAVEAISDR.T	17.587	18.2434	17.7523	18.2598	18.3564	17.9593	17.8609	0.278785	18.1918	0.16909	0.330893	0.224559
CATB_MOUSE	Cathepsin B	CATB_MOUSE_Cys122	R.TCIHTNGR.V	15.3658	16.1328	15.1555	16.9915	17.0854	15.4611	15.5514	0.419983	16.5126	0.744574	0.961265	0.186984
CATB_MOUSE	Cathepsin B	CATB_MOUSE_Cys207	R.CNKSCEAGYSPSYK.E	16.2222	16.0953	15.8962	15.7269	15.8249	15.746	16.0712	0.134184	15.7659	0.042401	-0.305298	0.0373615
CATB_MOUSE	Cathepsin B	CATB_MOUSE_Cys211	K.SCEAGYSPSYK.E	22.5792	22.5655	22.1232	22.1376	22.1428	22.0097	22.4226	0.2118	22.0967	0.0615874	-0.325908	0.104881
CATB_MOUSE	Cathepsin B	CATB_MOUSE_Cys59	K.LCGTVLGGPK.L	20.5817	20.5441	20.2712	20.0279	19.914	19.9462	20.4657	0.138406	19.9627	0.0479295	-0.502958	0.0083019
CATB_MOUSE	Cathepsin B	CATB_MOUSE_Cys93	D.IDLPETFDAREQWSNCPTIGQIR.D	22.8378	22.7952	22.4624	22.5992	22.5165	22.2674	22.6985	0.167816	22.461	0.140998	-0.237453	0.200269
CATC_MOUSE	Dipeptidyl peptidase 1	CATC_MOUSE_Cys320	K.YAQDFGVVEESCFPYTAK.D	19.0767	19.0452	18.805	18.8129	18.6963	18.6733	18.9756	0.121355	18.7275	0.0611209	-0.248128	0.0611656
CATD_MOUSE	Cathepsin D	CATD_MOUSE_Cys117	K.ILDIACWVHHK.Y	20.8189	20.609	20.4429	20.4329	20.387	20.1811	20.6236	0.153826	20.3337	0.109471	-0.289935	0.0956236
CATD_MOUSE	Cathepsin D	CATD_MOUSE_Cys327	K.AIGAVPLIQGEYMIPCEK.V	18.0392	18.1301	18.0403	17.9402	17.8429	17.8578	18.0699	0.0425817	17.8803	0.0427909	-0.189561	0.0113271
CATL1_MOUSE	Cathepsin L1	CATL1_MOUSE_Cys125	R.EKGCVTPVK.N	22.1773	22.2555	22.35	22.2286	22.0316	21.9401	22.261	0.0706203	22.0668	0.120353	-0.194212	0.120408
CATL1_MOUSE	Cathepsin L1	CATL1_MOUSE_Cys169	K.LISLSEQNLVDCSHAQGNQGCNGGLM*DFAFQYIK.E	15.6664	16.6732	15.9179	17.258	17.2634	15.6807	16.0858	0.427836	16.7341	0.744843	0.648267	0.345967
CATL1_MOUSE	Cathepsin L1	CATL1_MOUSE_Cys178	K.LISLSEQNLVDCSHAQGNQGCNGGLM*DFAFQYIK.E	15.6664	16.6732	15.9179	17.258	17.2634	15.6807	16.0858	0.427836	16.7341	0.744843	0.648267	0.345967
CATL1_MOUSE	Cathepsin L1	CATL1_MOUSE_Cys269	Y.SSGIYYEPNCSSK.N	18.1801	18.2224	17.8317	17.7474	17.3887	17.7664	18.0781	0.175069	17.6342	0.173771	-0.443899	0.0636432
CATL1_MOUSE	Cathepsin L1	CATL1_MOUSE_Cys322	K.DRDNHCGLATAASYPVVN.-	16.7499	16.7186	16.7672	16.5592	16.443	16.7431	16.7452	0.0201103	16.5818	0.123549	-0.163456	0.138515
CATS_MOUSE	Cathepsin S	CATS_MOUSE_Cys134	K.GCVTEVK.Y	20.1517	20.1551	20.0452	19.8657	19.8373	19.8292	20.1173	0.05102	19.8441	0.0156737	-0.273266	0.00193081
CATS_MOUSE	Cathepsin S	CATS_MOUSE_Cys178	K.LISLSAQNLVDCSNEEK.Y	20.46	20.5449	20.0813	19.8965	20.2332	19.8283	20.3621	0.201563	19.986	0.176988	-0.376068	0.118434
CATS_MOUSE	Cathepsin S	CATS_MOUSE_Cys222	K.CHYNSK.N	14.0137	14.0923	13.7479	13.7085	13.6234	13.4522	13.9513	0.147367	13.5947	0.10658	-0.356567	0.0501943
CATZ_MOUSE	Cathepsin Z	CATZ_MOUSE_Cys156	K.HGIPDETCNNYQAK.D	21.2854	21.2695	20.9552	20.8787	21.0224	20.5897	21.17	0.152037	20.8303	0.179936	-0.339733	0.110999
CATZ_MOUSE	Cathepsin Z	CATZ_MOUSE_Cys35	R.SGQTCYHPIR.G	16.4491	16.4691	16.6599	16.3069	16.234	16.2884	16.526	0.0949921	16.2764	0.030927	-0.249591	0.0241589
CCD50_MOUSE	Coiled-coil domain-containing protein 50	CCD50_MOUSE_Cys237	R.KHDPECK.L	13.7028	13.581	13.5278	13.3985	13.0903	13.1716	13.6039	0.0732334	13.2201	0.13043	-0.383739	0.022199
CD027_MOUSE	UPF0609 protein C4orf27 homolog	CD027_MOUSE_Cys102	K.KPTGLNCNLHWR.F	15.4158	15.2955	15.5022	15.1459	14.9624	15.0613	15.4045	0.0847575	15.0565	0.074967	-0.347941	0.0121704
CD027_MOUSE	UPF0609 protein C4orf27 homolog	CD027_MOUSE_Cys17	R.TAGAGPQCEK.T	15.113	15.0969	14.929	14.8745	15.0861	14.767	15.0463	0.0832028	14.9092	0.132549	-0.137137	0.282997
CD166_MOUSE	CD166 antigen	CD166_MOUSE_Cys354	K.QIGDTLPVSCTISASR.N	18.5769	18.4914	18.357	18.381	18.3894	18.1288	18.4751	0.0905388	18.2997	0.120911	-0.175388	0.175922
CD180_MOUSE	CD180 antigen	CD180_MOUSE_Cys365	R.LELGTGCLENLENLR.E	20.8375	20.7929	20.7055	20.6714	20.6994	20.4801	20.7786	0.0548416	20.617	0.0974704	-0.161662	0.110413
CD180_MOUSE	CD180 antigen	CD180_MOUSE_Cys387	R.ELDLSHDDIETSDCCNLQLR.N	17.2054	16.9891	16.7496	16.8028	16.9235	16.7308	16.9814	0.186131	16.819	0.0795375	-0.162365	0.319996
CD180_MOUSE	CD180 antigen	CD180_MOUSE_Cys388	R.ELDLSHDDIETSDCCNLQLR.N	17.2054	16.9891	16.7496	16.8028	16.9235	16.7308	16.9814	0.186131	16.819	0.0795375	-0.162365	0.319996
CD180_MOUSE	CD180 antigen	CD180_MOUSE_Cys581	R.QNPLDCTCSNIYFLEWYKENMQK.L	14.9189	15.3536	14.5143	15.2105	14.9457	15.3019	14.9289	0.342694	15.1527	0.151061	0.223754	0.445724
CD180_MOUSE	CD180 antigen	CD180_MOUSE_Cys583	R.QNPLDCTCSNIYFLEWYKENMQK.L	14.9189	15.3536	14.5143	15.2105	14.9457	15.3019	14.9289	0.342694	15.1527	0.151061	0.223754	0.445724
CD36_MOUSE	Platelet glycoprotein 4	CD36_MOUSE_Cys311	R.FVLPANAFASPLQNPDNHCFCTEK.V	19.6697	19.3178	19.5392	19.6255	19.5269	18.6679	19.5089	0.145248	19.2734	0.430058	-0.235486	0.503836
CD36_MOUSE	Platelet glycoprotein 4	CD36_MOUSE_Cys313	R.FVLPANAFASPLQNPDNHCFCTEK.V	19.6697	19.3178	19.5392	19.6255	19.5269	18.6679	19.5089	0.145248	19.2734	0.430058	-0.235486	0.503836
CD37_MOUSE	Leukocyte antigen CD37	CD37_MOUSE_Cys230	R.EGCAQSLQK.W	17.2904	17.1276	16.7589	16.6849	16.5995	16.5032	17.059	0.222355	16.5958	0.0742109	-0.463129	0.0491078
CD68_MOUSE	Macrosialin	CD68_MOUSE_Cys22	G.TEEDCPHKK.A	13.3369	13.6021	13.32	12.9969	12.2989	12.9144	13.4196	0.12918	12.7367	0.311406	-0.682902	0.0457159
CD68_MOUSE	Macrosialin	CD68_MOUSE_Cys283	R.LQAAQLPDKGHFGPCFSCNR.D	17.1544	16.6072	16.5123	16.3993	16.5207	16.4384	16.758	0.282962	16.4528	0.0505942	-0.305179	0.207646
CD68_MOUSE	Macrosialin	CD68_MOUSE_Cys286	R.LQAAQLPDKGHFGPCFSCNR.D	17.1544	16.6072	16.5123	16.3993	16.5207	16.4384	16.758	0.282962	16.4528	0.0505942	-0.305179	0.207646
CD72_MOUSE	B-cell differentiation antigen CD72	CD72_MOUSE_Cys188	R.THEDAEQQLQACQAER.A	16.4259	16.4533	16.2468	15.9899	15.8602	15.8309	16.3753	0.091573	15.8937	0.0690787	-0.48163	0.004033
CD81_MOUSE	CD81 antigen	CD81_MOUSE_Cys175	R.NSLCPSGGNILTPLLQQDCHQK.I	16.9908	17.022	16.9421	16.817	16.6485	16.5463	16.985	0.0329004	16.6706	0.111605	-0.314387	0.0187587
CD81_MOUSE	CD81 antigen	CD81_MOUSE_Cys190	R.NSLCPSGGNILTPLLQQDCHQK.I	16.9908	17.022	16.9421	16.817	16.6485	16.5463	16.985	0.0329004	16.6706	0.111605	-0.314387	0.0187587
CD9_MOUSE	CD9 antigen	CD9_MOUSE_Cys150	K.AIHMALDCCGIAGPLEQFISDTCPK.K	19.8038	19.6333	20.1749	20.1724	19.9381	20.0855	19.8707	0.226083	20.0653	0.0967091	0.194665	0.325585
CD9_MOUSE	CD9 antigen	CD9_MOUSE_Cys151	K.AIHMALDCCGIAGPLEQFISDTCPK.K	19.8038	19.6333	20.1749	20.1724	19.9381	20.0855	19.8707	0.226083	20.0653	0.0967091	0.194665	0.325585
CD9_MOUSE	CD9 antigen	CD9_MOUSE_Cys165	K.AIHMALDCCGIAGPLEQFISDTCPK.K	19.8038	19.6333	20.1749	20.1724	19.9381	20.0855	19.8707	0.226083	20.0653	0.0967091	0.194665	0.325585
CDC27_MOUSE	Cell division cycle protein 27 homolog	CDC27_MOUSE_Cys137	K.GSECYQK.S	15.7326	15.8545	15.7429	15.5812	15.6065	15.5687	15.7767	0.0552079	15.5855	0.0157049	-0.191204	0.00923281
CDC37_MOUSE	Hsp90 co-chaperone Cdc37	CDC37_MOUSE_Cys64	R.KVAECQR.K	17.3678	17.1411	17.439	17.1993	17.0006	17.2385	17.316	0.127012	17.1461	0.104165	-0.169847	0.217479
CDC42_MOUSE	Cell division control protein 42 homolog	CDC42_MOUSE_Cys157	K.YVECSALTQK.G	22.8527	22.9273	23.1818	22.7409	22.6953	22.7764	22.9873	0.140903	22.7375	0.0332184	-0.249751	0.0712229
CDC42_MOUSE	Cell division control protein 42 homolog	CDC42_MOUSE_Cys6	K.CVVVGDGAVGK.T	21.5378	21.3612	21.7041	21.1356	21.1375	21.0901	21.5344	0.140014	21.121	0.0219193	-0.413346	0.0145559
CE170_MOUSE	Centrosomal protein of 170 kDa	CE170_MOUSE_Cys211	K.SQEAGASGCSTEAK.H	12.2034	11.9467	11.6843	11.4829	11.6475	11.4697	11.9448	0.21194	11.5334	0.0808659	-0.411476	0.0622895
CE170_MOUSE	Centrosomal protein of 170 kDa	CE170_MOUSE_Cys959	R.CSTSSPSK.D	12.9928	12.7946	12.6043	12.2386	12.6555	12.458	12.7972	0.158601	12.4507	0.170299	-0.346552	0.102953
CELF2_MOUSE	CUGBP Elav-like family member 2	CELF2_MOUSE_Cys143	K.KCNENDIR.V	15.7119	15.5369	15.8251	15.6654	15.7438	15.5466	15.6913	0.118576	15.6519	0.081075	-0.0393762	0.718006
CELF2_MOUSE	CUGBP Elav-like family member 2	CELF2_MOUSE_Cys174	R.GCAFVTFSTR.A	20.325	20.2234	20.2011	20.1801	20.2303	20.2092	20.2498	0.0539172	20.2065	0.0205639	-0.0433028	0.348408
CELF2_MOUSE	CUGBP Elav-like family member 2	CELF2_MOUSE_Cys201	K.AMHQSQTMEGCSSPIVVK.F	14.3229	13.9087	14.644	14.1176	13.9212	14.608	14.2919	0.300984	14.2156	0.28884	-0.0762572	0.808762
CH60_MOUSE	60 kDa heat shock protein, mitochondrial	CH60_MOUSE_Cys442	R.AAVEEGIVLGGGCALLR.C	20.3218	20.1244	20.4177	19.9814	20.1625	20.1428	20.2879	0.12209	20.0956	0.0811283	-0.192377	0.137037
CH60_MOUSE	60 kDa heat shock protein, mitochondrial	CH60_MOUSE_Cys447	R.CIPALDSLKPANEDQK.I	20.1793	20.0302	20.5296	19.8308	19.6236	19.9036	20.2464	0.209316	19.786	0.118616	-0.460351	0.0537588
CHERP_MOUSE	Calcium homeostasis endoplasmic reticulum protein	CHERP_MOUSE_Cys69	K.LALEQQQLICK.Q	17.4406	17.3999	17.1477	17.4	17.368	17.3114	17.3294	0.129569	17.3598	0.0366535	0.0304335	0.765246
CHIP_MOUSE	STIP1 homology and U box-containing protein 1	CHIP_MOUSE_Cys233	R.DIPDYLCGK.I	19.3043	19.408	19.3008	19.1905	19.1387	19.1985	19.3377	0.0497115	19.1759	0.0264717	-0.161793	0.0153152
CISD1_MOUSE	CDGSH iron-sulfur domain-containing protein 1	CISD1_MOUSE_Cys72	K.VVHAFDMEDLGDKAVYCR.C	15.2923	15.3744	14.872	15.2663	14.9553	14.9692	15.1796	0.220083	15.0636	0.14343	-0.11597	0.566258
CISD1_MOUSE	CDGSH iron-sulfur domain-containing protein 1	CISD1_MOUSE_Cys83	K.KFPFCDGAHIK.H	20.4374	20.4467	20.1394	20.2408	20.1855	20.1858	20.3412	0.142705	20.204	0.0260009	-0.137133	0.252197
CISD2_MOUSE	CDGSH iron-sulfur domain-containing protein 2	CISD2_MOUSE_Cys110	K.TFPACDGSHNK.H	16.3037	16.4047	16.2124	16.222	16.5253	15.6512	16.3069	0.0785572	16.1328	0.362361	-0.174078	0.543029
CISD2_MOUSE	CDGSH iron-sulfur domain-containing protein 2	CISD2_MOUSE_Cys92	K.VVNEINIEDLCLTK.A	17.8572	17.6412	17.8802	17.6833	17.8003	17.6812	17.7929	0.107645	17.7216	0.0556662	-0.0712773	0.452303
CISY_MOUSE	Citrate synthase, mitochondrial	CISY_MOUSE_Cys101	R.GYSIPECQK.M	18.8625	18.8878	19.1555	18.8146	19.1646	18.5933	18.9686	0.132535	18.8575	0.235199	-0.111106	0.59178
CK5P3_MOUSE	CDK5 regulatory subunit-associated protein 3	CK5P3_MOUSE_Cys165	R.EQFYHSCK.Q	15.6496	15.9357	16.2779	16.1045	15.6115	15.9773	15.9544	0.256817	15.8978	0.208969	-0.0566028	0.820847
CL12A_MOUSE	C-type lectin domain family 12 member A	CL12A_MOUSE_Cys118	K.IKNLSAMLQSTATQLCR.E	18.5835	18.7578	18.5174	18.2939	18.5286	18.3445	18.6196	0.101384	18.389	0.100853	-0.230614	0.0847281
CLCA_MOUSE	Clathrin light chain A	CLCA_MOUSE_Cys205	R.LCDFNPK.S	17.3349	17.4207	17.6491	17.2881	17.1786	17.3177	17.4682	0.132611	17.2614	0.0598456	-0.206782	0.1148
CLH1_MOUSE	Clathrin heavy chain 1	CLH1_MOUSE_Cys1102	R.CNEPAVWSQLAK.A	19.9413	19.9711	19.8955	19.4545	19.5506	19.3406	19.9359	0.0310783	19.4485	0.0858362	-0.487394	0.00164852
CLH1_MOUSE	Clathrin heavy chain 1	CLH1_MOUSE_Cys1257	K.EVCFAC#VDGK.E	19.3041	19.2305	19.3751	19.0103	19.1208	19.0541	19.3032	0.0590163	19.0617	0.0454655	-0.241513	0.0101476
CLH1_MOUSE	Clathrin heavy chain 1	CLH1_MOUSE_Cys1528	K.QSVELCK.K	20.703	20.7945	20.765	20.5254	20.6321	20.5953	20.7542	0.0381152	20.5842	0.0442491	-0.16993	0.0146733
CLH1_MOUSE	Clathrin heavy chain 1	CLH1_MOUSE_Cys617	R.AHIAQLCEK.A	22.9017	23.1004	23.271	22.8052	22.7898	22.7475	23.091	0.150923	22.7808	0.0243879	-0.310207	0.0454895
CLH1_MOUSE	Clathrin heavy chain 1	CLH1_MOUSE_Cys682	R.QNLQICVQVASK.Y	19.1078	19.2921	19.0928	18.8128	19.0535	18.743	19.1642	0.0906308	18.8698	0.132997	-0.294469	0.0608413
CLH1_MOUSE	Clathrin heavy chain 1	CLH1_MOUSE_Cys736	K.YIQAACK.T	20.27	20.4194	20.4927	20.1828	20.2711	20.1078	20.394	0.0926673	20.1872	0.0667701	-0.206794	0.0626057
CLH1_MOUSE	Clathrin heavy chain 1	CLH1_MOUSE_Cys753	R.ESNCYDPER.V	14.5792	14.6116	14.8791	14.588	14.4671	14.5457	14.69	0.134379	14.5336	0.0500887	-0.156389	0.197888
CLH1_MOUSE	Clathrin heavy chain 1	CLH1_MOUSE_Cys926	R.GQCDLELINVC#NENSLFK.S	18.1763	17.8857	18.5415	18.1902	18.0628	18.2542	18.2012	0.268322	18.1691	0.0795741	-0.0320611	0.879155
CLIC1_MOUSE	Chloride intracellular channel protein 1	CLIC1_MOUSE_Cys178	R.KFLDGNELTLADCNLLPK.L	19.9218	19.8652	20.3299	20.0547	19.5594	19.8168	20.039	0.207009	19.8103	0.202269	-0.228668	0.326424
CLIC1_MOUSE	Chloride intracellular channel protein 1	CLIC1_MOUSE_Cys24	K.IGNCPFSQR.L	19.8626	19.7946	19.5589	19.5258	19.4695	19.499	19.7387	0.130117	19.4981	0.0230216	-0.2406	0.0616498
CLIC1_MOUSE	Chloride intracellular channel protein 1	CLIC1_MOUSE_Cys59	K.LCPGGQLPFLLYGTEVHTDTNKIEEFLEAMLC#PPR.Y	17.425	17.4575	17.608	17.3645	17.3642	17.3205	17.4968	0.0797525	17.3497	0.0206837	-0.147071	0.0650498
CLIC4_MOUSE	Chloride intracellular channel protein 4	CLIC4_MOUSE_Cys100	K.TDVNKIEEFLEEVLCPPK.Y	13.7453	13.5015	14.0283	13.7274	14.431	13.6667	13.7583	0.215261	13.9417	0.34685	0.183368	0.559787
CLIC4_MOUSE	Chloride intracellular channel protein 4	CLIC4_MOUSE_Cys189	R.FLDGDEMTLADCNLLPK.L	18.8298	18.9444	19.1407	19.009	19.0027	18.9186	18.9716	0.128358	18.9768	0.041223	0.00511478	0.959783
CLIC4_MOUSE	Chloride intracellular channel protein 4	CLIC4_MOUSE_Cys234	R.DEFTNTCPSDK.E	17.7656	17.9804	18.0481	17.6609	17.7501	17.6636	17.9314	0.120424	17.6915	0.0414132	-0.239861	0.0561716
CLIP1_MOUSE	CAP-Gly domain-containing linker protein 1	CLIP1_MOUSE_Cys264	R.YFQCQPK.Y	19.9242	20.0158	20.0726	19.929	19.952	19.8712	20.0042	0.0611222	19.9174	0.0339799	-0.0867871	0.154103
CLU_MOUSE	Clustered mitochondria protein homolog	CLU_MOUSE_Cys214	R.DWKPLQCLK.V	19.6164	19.5034	19.527	19.5878	19.5298	19.3304	19.5489	0.0486772	19.4827	0.110243	-0.0662346	0.480404
CNBP_MOUSE	Cellular nucleic acid-binding protein	CNBP_MOUSE_Cys102	R.EQC#C#YNCGKPGHLAR.D	18.1824	18.5381	18.2364	18.0446	18.1914	18.1054	18.319	0.156529	18.1138	0.0602303	-0.205183	0.158658
CNBP_MOUSE	Cellular nucleic acid-binding protein	CNBP_MOUSE_Cys120	K.CYSC#GEFGHIQK.D	21.0671	21.1823	21.097	20.8603	20.9975	20.9668	21.1154	0.0488186	20.9415	0.0587701	-0.173935	0.0322932
CNBP_MOUSE	Cellular nucleic acid-binding protein	CNBP_MOUSE_Cys123	R.DC#DHADEQKC#YSCGEFGHIQK.D	15.4129	14.5935	15.4669	14.7812	15.1111	14.7915	15.1578	0.39959	14.8946	0.15315	-0.263175	0.433527
CNBP_MOUSE	Cellular nucleic acid-binding protein	CNBP_MOUSE_Cys133	K.C#YSC#GEFGHIQKDCTK.V	16.0213	15.9957	16.3959	16.448	15.8076	16.1088	16.1376	0.182911	16.1214	0.261585	-0.0161585	0.946363
CNBP_MOUSE	Cellular nucleic acid-binding protein	CNBP_MOUSE_Cys159	K.TSEVNCYR.C	18.9001	19.0422	18.9227	18.6922	18.5019	18.6533	18.955	0.0623492	18.6158	0.0820892	-0.33918	0.00963779
CNBP_MOUSE	Cellular nucleic acid-binding protein	CNBP_MOUSE_Cys54	R.GFQFVSSSLPDICYR.C	22.3272	22.4101	22.6037	22.4517	22.1407	22.3993	22.447	0.115844	22.3306	0.135927	-0.116464	0.408602
CNBP_MOUSE	Cellular nucleic acid-binding protein	CNBP_MOUSE_Cys98	R.EQCCYNC#GKPGHLAR.D	18.9633	19.2727	19.55	19.0203	19.153	18.9101	19.262	0.239653	19.0278	0.0993159	-0.234205	0.270767
CNBP_MOUSE	Cellular nucleic acid-binding protein	CNBP_MOUSE_Cys99	R.EQC#CYNC#GKPGHLAR.D	18.6534	17.8404	18.6245	18.1758	18.1603	18.1254	18.3728	0.376612	18.1538	0.0210837	-0.218943	0.457826
CND1_MOUSE	Condensin complex subunit 1	CND1_MOUSE_Cys1219	R.DLAYCMSQLPLTER.G	17.9276	17.9891	18.0167	17.9071	18.0278	18.0415	17.9778	0.037244	17.9921	0.0603824	0.0143536	0.788989
CND1_MOUSE	Condensin complex subunit 1	CND1_MOUSE_Cys806	R.LAQQVCLAIANISDR.R	16.16	16.1179	16.1503	16.1092	16.0621	16.0369	16.1427	0.0179903	16.0694	0.0299479	-0.0733296	0.04121
CO3_MOUSE	Complement C3	CO3_MOUSE_Cys1537	K.ACEPGVDYVYK.T	19.068	19.1769	18.7184	19.1236	19.2427	18.9134	18.9877	0.195587	19.0932	0.136113	0.105493	0.565208
COF1_MOUSE	Cofilin-1	COF1_MOUSE_Cys139	K.LTGIKHELQANCYEEVKDR.C	16.6211	16.3855	16.5627	16.536	16.3859	16.0818	16.5231	0.100174	16.3346	0.188955	-0.188552	0.280487
COF1_MOUSE	Cofilin-1	COF1_MOUSE_Cys39	K.AVLFCLSEDK.K	23.6863	23.6088	23.8668	23.6121	23.4371	23.4855	23.7206	0.108088	23.5115	0.0737967	-0.209089	0.0867445
COF1_MOUSE	Cofilin-1	COF1_MOUSE_Cys80	K.MLPDKDCRYALYDATYETK.E	21.6772	21.8818	21.7627	21.6609	21.5	21.5509	21.7739	0.0839066	21.5706	0.0671605	-0.203268	0.0555327
COG2_MOUSE	Conserved oligomeric Golgi complex subunit 2	COG2_MOUSE_Cys358	R.QCGSQASVK.R	13.5048	13.6767	13.8835	13.3393	13.3658	13.3473	13.6883	0.154831	13.3508	0.0110884	-0.337525	0.03711
COL12_MOUSE	Collectin-12	COL12_MOUSE_Cys27	R.FGIQEGTQCTK.C	18.3984	18.3821	18.4133	18.0595	17.9697	18.1082	18.3979	0.0127426	18.0458	0.0573796	-0.352113	0.00106391
COL12_MOUSE	Collectin-12	COL12_MOUSE_Cys371	R.TTCTDTLTR.H	17.898	17.8809	17.488	16.9615	17.2228	17.0916	17.7556	0.189395	17.092	0.106659	-0.663654	0.0124682
COPA_MOUSE	Coatomer subunit alpha	COPA_MOUSE_Cys380	K.FPVFNMSYNPAENAVLLCTR.A	15.7387	15.8394	15.8356	15.9125	15.5038	15.7244	15.8046	0.0465841	15.7136	0.166997	-0.091014	0.499071
COPA_MOUSE	Coatomer subunit alpha	COPA_MOUSE_Cys522	R.KLDALCNIHENIR.V	15.9081	15.9611	16.276	15.7707	16.437	15.8651	16.0484	0.162373	16.0243	0.294376	-0.0241377	0.92401
COPB_MOUSE	Coatomer subunit beta	COPB_MOUSE_Cys102	R.LLHEMILVCDAYR.K	16.2887	16.4316	16.0879	16.2368	16.2785	16.1015	16.2694	0.140974	16.2056	0.0755641	-0.0638068	0.602777
COPB_MOUSE	Coatomer subunit beta	COPB_MOUSE_Cys284	K.AAAQCYIDLIIK.E	17.1075	17.1536	17.0584	16.8835	16.8759	16.5885	17.1065	0.038852	16.7826	0.137307	-0.323879	0.0325946
COPB_MOUSE	Coatomer subunit beta	COPB_MOUSE_Cys466	R.GALWILGEYCSTK.E	16.9116	17.0498	17.2321	16.8541	16.8789	16.9055	17.0645	0.131259	16.8795	0.0209663	-0.185033	0.120358
COPB_MOUSE	Coatomer subunit beta	COPB_MOUSE_Cys623	K.VLSECSPLMNDIFNK.E	18.417	18.5474	18.7523	18.5328	18.4704	18.3683	18.5722	0.138029	18.4572	0.0678131	-0.115039	0.349761
COPG1_MOUSE	Coatomer subunit gamma-1	COPG1_MOUSE_Cys129	R.ALCQITDSTMLQAVER.Y	17.7709	17.5062	17.6899	17.8057	17.6599	17.5382	17.6556	0.110746	17.668	0.109331	0.012321	0.916243
COPG2_MOUSE	Coatomer subunit gamma-2	COPG2_MOUSE_Cys810	K.TLEEAVNNIITFLGMQPCER.S	16.1301	15.4145	16.3017	16.1287	16.1639	15.9863	15.9487	0.384204	16.0929	0.0767785	0.144208	0.630182
COR1C_MOUSE	Coronin-1C	COR1C_MOUSE_Cys190	R.NGSLICTASK.D	18.7953	18.715	18.6753	18.4115	18.4317	18.3873	18.7285	0.049891	18.4101	0.0181436	-0.318385	0.00105935
COX5B_MOUSE	Cytochrome c oxidase subunit 5B, mitochondrial	COX5B_MOUSE_Cys112	R.CPNCGTHYK.L	20.0904	19.8252	20.1511	19.6219	19.8702	19.6774	20.0222	0.141502	19.7232	0.106422	-0.299031	0.0752912
COX5B_MOUSE	Cytochrome c oxidase subunit 5B, mitochondrial	COX5B_MOUSE_Cys115	R.CPNCGTHYK.L	16.2105	16.1427	16.063	15.9316	16.0405	15.7636	16.1387	0.0602929	15.9119	0.113868	-0.226835	0.0675027
CPNE1_MOUSE	Copine-1	CPNE1_MOUSE_Cys52	R.NCSSPEFSK.T	18.0266	17.9777	17.8944	17.7646	17.7945	17.7129	17.9663	0.0545695	17.7573	0.0337026	-0.208908	0.00998322
CPPED_MOUSE	Calcineurin-like phosphoesterase domain-containing protein 1	CPPED_MOUSE_Cys88	K.FFVLCGDLVHAMPGTPWR.Q	16.6661	16.739	16.9017	16.9854	16.8946	16.7879	16.7689	0.0985122	16.8893	0.080704	0.120355	0.25233
CRIP1_MOUSE	Cysteine-rich protein 1	CRIP1_MOUSE_Cys28	K.DWHRPCLK.C	15.1421	14.5511	15.2438	15.1076	14.7486	14.6732	14.979	0.305391	14.8431	0.189521	-0.135914	0.621143
CRIP1_MOUSE	Cysteine-rich protein 1	CRIP1_MOUSE_Cys7	K.CDKEVYFAER.V	23.6213	23.6709	23.1916	22.926	23.1367	22.9537	23.4946	0.215196	23.0055	0.0934809	-0.489104	0.0420481
CRKL_MOUSE	Crk-like protein	CRKL_MOUSE_Cys249	K.RVPCAYDK.T	18.0256	17.9934	18.6833	18.4592	18.3013	18.3366	18.2341	0.317887	18.3657	0.067649	0.131642	0.597428
CSDE1_MOUSE	Cold shock domain-containing protein E1	CSDE1_MOUSE_Cys680	R.ATVECVK.D	19.5929	19.7091	19.8297	19.7086	19.472	19.6077	19.7106	0.0967	19.5961	0.0969694	-0.114461	0.302665
CSK2B_MOUSE	Casein kinase II subunit beta	CSK2B_MOUSE_Cys109	K.YQQGDFGYCPR.V	18.8657	18.8913	18.8673	18.78	18.6692	18.5897	18.8748	0.0117197	18.6796	0.078026	-0.195164	0.0249392
CSN3_MOUSE	COP9 signalosome complex subunit 3	CSN3_MOUSE_Cys298	K.QCLSSLYK.K	20.2193	20.3602	20.2186	20.0113	20.0407	19.929	20.266	0.0665719	19.9937	0.0472976	-0.27234	0.00919681
CSTF2_MOUSE	Cleavage stimulation factor subunit 2	CSTF2_MOUSE_Cys150	K.LCVQNSPQEAR.N	15.8512	15.8396	16.0855	15.9018	15.7789	15.8215	15.9254	0.113301	15.8341	0.0509691	-0.0913738	0.357021
CTL1_MOUSE	Choline transporter-like protein 1	CTL1_MOUSE_Cys97	K.YVFFLDPCNLDLINR.K	16.2045	16.5357	16.5678	16.4873	16.5015	16.4328	16.436	0.164243	16.4739	0.0296149	0.0378944	0.764203
CTL2_MOUSE	Choline transporter-like protein 2	CTL2_MOUSE_Cys158	R.DGECPAVITPSKPLAQR.C	16.8569	16.7231	16.6995	16.3993	16.4291	16.3945	16.7598	0.0693294	16.4076	0.0152862	-0.352203	0.00217358
CTND1_MOUSE	Catenin delta-1	CTND1_MOUSE_Cys692	K.TPAILEASAGAIQNLCAGR.W	17.6733	17.8306	17.502	17.5312	17.6139	17.3941	17.6686	0.134178	17.513	0.0906216	-0.155597	0.245712
CTU1_MOUSE	Cytoplasmic tRNA 2-thiolation protein 1	CTU1_MOUSE_Cys287	R.LALAPAAKPPPPGTCSR.C	19.1392	19.2756	19.227	18.9879	18.9304	18.8827	19.2139	0.0564654	18.9337	0.0430327	-0.280262	0.00504786
CTU1_MOUSE	Cytoplasmic tRNA 2-thiolation protein 1	CTU1_MOUSE_Cys360	K.DKANPCGNGGDR.A	12.5225	12.3187	12.2618	12.0621	12.352	11.9356	12.3677	0.111947	12.1166	0.174315	-0.251086	0.161675
CTU2_MOUSE	Cytoplasmic tRNA 2-thiolation protein 2	CTU2_MOUSE_Cys266	R.VHGYCK.V	15.3489	16.0687	15.894	15.7831	15.8973	15.7071	15.7705	0.306541	15.7958	0.0781654	0.0253044	0.915385
CUL1_MOUSE	Cullin-1	CUL1_MOUSE_Cys496	K.QACGFEYTSK.L	18.1505	18.1677	18.4046	18.0638	18.193	18.0717	18.2409	0.115924	18.1095	0.0591509	-0.131388	0.226545
CUL3_MOUSE	Cullin-3	CUL3_MOUSE_Cys636	R.ALQSLACGKPTQR.V	20.7109	20.5763	20.9029	20.4317	20.44	20.4831	20.73	0.134047	20.4516	0.0225332	-0.278472	0.0442392
CUL4A_MOUSE	Cullin-4A	CUL4A_MOUSE_Cys633	R.TLQSLACGK.A	19.8877	20.0101	20.0416	19.807	19.8147	19.7537	19.9798	0.0663749	19.7918	0.0271211	-0.187996	0.0206914
CX6B1_MOUSE	Cytochrome c oxidase subunit 6B1	CX6B1_MOUSE_Cys65	K.SLCPVSWVSAWDDR.I	18.9644	18.8177	18.8898	18.921	18.8561	18.8494	18.8906	0.0599164	18.8755	0.032292	-0.0151133	0.769202
CY1_MOUSE	Cytochrome c1, heme protein, mitochondrial	CY1_MOUSE_Cys219	R.HGGEDYVFSLLTGYCEPPTGVSLR.E	16.5389	16.4135	16.8008	16.9996	16.7611	17.1019	16.5844	0.161327	16.9542	0.142776	0.369797	0.0721724
CYFP1_MOUSE	Cytoplasmic FMR1-interacting protein 1	CYFP1_MOUSE_Cys1180	R.FAVLDFCYHLLK.V	16.9492	16.824	17.1344	16.9356	16.9794	16.9257	16.9692	0.127488	16.9469	0.0233372	-0.0223062	0.81967
CYTB_MOUSE	Cystatin-B	CYTB_MOUSE_Cys64	K.VDVGGDKCVHLR.V	17.9524	17.6766	17.7104	17.5914	17.5767	17.5203	17.7798	0.122802	17.5628	0.0306748	-0.216993	0.0724139
CYTSB_MOUSE	Cytospin-B	CYTSB_MOUSE_Cys138	K.LGSSPTSSCNPTPTK.H	16.4675	16.5582	16.1924	16.1162	16.2334	16.2182	16.406	0.155537	16.1892	0.0520389	-0.21679	0.13494
DAB2_MOUSE	Disabled homolog 2	DAB2_MOUSE_Cys138	R.AFGYVCGGEGQHQFFAIK.T	18.9115	19.1439	19.2865	19.0087	18.9367	18.8563	19.114	0.154533	18.9339	0.0622428	-0.180062	0.201111
DAG1_MOUSE	Dystroglycan	DAG1_MOUSE_Cys711	K.ALSIAVTGSGSCR.H	18.9369	18.9366	18.8088	18.6303	18.6726	18.4566	18.8941	0.0602922	18.5865	0.0934429	-0.307579	0.0173717
DAZP1_MOUSE	DAZ-associated protein 1	DAZP1_MOUSE_Cys124	K.IFVGGIPHNCGETELR.E	19.0204	19.0063	18.8705	18.8876	19.06	18.7125	18.9657	0.0676063	18.8867	0.141859	-0.0790762	0.515991
DBNL_MOUSE	Drebrin-like protein	DBNL_MOUSE_Cys67	K.VMYAFCR.V	18.55	18.6265	18.637	18.5833	18.1259	18.2102	18.6045	0.0387874	18.3064	0.198742	-0.298063	0.10582
DCUP_MOUSE	Uroporphyrinogen decarboxylase	DCUP_MOUSE_Cys66	R.SPEAC#CELTLQPLR.R	17.7194	17.8877	17.9073	17.6402	17.6805	17.6737	17.8381	0.0843302	17.6648	0.017638	-0.173344	0.0466123
DDB1_MOUSE	DNA damage-binding protein 1	DDB1_MOUSE_Cys378	R.QGQGQLVTCSGAFK.E	18.9196	18.8176	19.0817	18.6022	18.6851	18.5816	18.9396	0.108731	18.623	0.0447325	-0.316667	0.0189564
DDX1_MOUSE	ATP-dependent RNA helicase DDX1	DDX1_MOUSE_Cys519	R.TKIDCDNLEQYFMQQGGGPDKK.G	13.5321	13.5023	13.4798	12.5696	13.7591	13.3943	13.5047	0.0214252	13.241	0.497555	-0.263755	0.495508
DDX17_MOUSE	Probable ATP-dependent RNA helicase DDX17	DDX17_MOUSE_Cys198	K.STCIYGGAPK.G	15.2461	15.2009	15.1683	15.0751	15.1639	15.0471	15.2051	0.0318881	15.0954	0.0497655	-0.109677	0.0585394
DDX17_MOUSE	Probable ATP-dependent RNA helicase DDX17	DDX17_MOUSE_Cys219	R.GVEICIATPGR.L	20.8311	20.8202	20.8752	21.3306	21.3992	21.2225	20.8422	0.02376	21.3174	0.0727371	0.475237	0.000926633
DDX21_MOUSE	Nucleolar RNA helicase 2	DDX21_MOUSE_Cys531	K.KDAQELSQNTCIK.Q	15.9698	15.9129	15.8596	16.3363	16.3387	16.1097	15.9141	0.0449894	16.2616	0.107418	0.347514	0.0134773
DDX3L_MOUSE	Putative ATP-dependent RNA helicase Pl10	DDX3L_MOUSE_Cys222	R.DLMACAQTGSGK.T	18.7912	18.6402	18.7803	18.4788	18.5812	18.4631	18.7372	0.0687296	18.5077	0.0523426	-0.229562	0.0198112
DDX5_MOUSE	Probable ATP-dependent RNA helicase DDX5	DDX5_MOUSE_Cys234	R.LIDFLECGK.T	20.106	20.0834	20.0333	20.424	20.5935	20.3658	20.0742	0.0304086	20.4611	0.0965821	0.386838	0.00568142
DDX6_MOUSE	Probable ATP-dependent RNA helicase DDX6	DDX6_MOUSE_Cys102	K.GNEFEDYCLKR.E	16.1199	16.6608	16.1159	16.5125	16.6361	16.2002	16.2988	0.25592	16.4496	0.183411	0.150768	0.535428
DEOC_MOUSE	Putative deoxyribose-phosphate aldolase	DEOC_MOUSE_Cys100	K.GITTAAVCVYPAR.V	19.9359	19.7874	19.9893	19.6579	19.6784	19.6556	19.9042	0.085403	19.664	0.0102787	-0.240222	0.0168264
DGLB_MOUSE	Sn1-specific diacylglycerol lipase beta	DGLB_MOUSE_Cys86	R.GTICNPGPR.K	17.3624	17.3555	17.3105	17.1139	17.0207	17.1071	17.3428	0.0229805	17.0806	0.0424366	-0.262238	0.00154218
DHB11_MOUSE	Estradiol 17-beta-dehydrogenase 11	DHB11_MOUSE_Cys94	K.LGAQAHPFVVDCSQR.E	14.4752	14.5239	14.8126	14.5995	14.7895	14.2871	14.6039	0.148879	14.5587	0.207117	-0.0452342	0.814329
DHB4_MOUSE	Peroxisomal multifunctional enzyme type 2	DHB4_MOUSE_Cys175	K.LGILGLCNTLAIEGR.K	16.4175	15.9593	16.222	15.7417	16.0423	15.8303	16.1996	0.187705	15.8714	0.126106	-0.328158	0.109407
DHB4_MOUSE	Peroxisomal multifunctional enzyme type 2	DHB4_MOUSE_Cys189	R.KNNIHCNTIAPNAGSR.M	14.5018	14.9528	14.1698	14.136	14.6923	14.3811	14.5415	0.320892	14.4031	0.227651	-0.13835	0.645075
DHE3_MOUSE	Glutamate dehydrogenase 1, mitochondrial	DHE3_MOUSE_Cys172	K.CAVVDVPFGGAK.A	21.343	21.269	21.0733	20.6672	20.9178	20.6561	21.2284	0.113778	20.747	0.120854	-0.481421	0.0148316
DHSA_MOUSE	Succinate dehydrogenase [ubiquinone] flavoprotein subunit, mitochondrial	DHSA_MOUSE_Cys357	R.GCGPEKDHVYLQLHHLPPEQLATR.L	14.5897	14.7362	13.8289	14.6521	14.4493	14.7348	14.3849	0.397671	14.6121	0.119959	0.227152	0.482458
DHSA_MOUSE	Succinate dehydrogenase [ubiquinone] flavoprotein subunit, mitochondrial	DHSA_MOUSE_Cys654	K.TLNEADCATVPPAIR.S	17.4973	17.4112	17.4557	17.0612	16.9635	16.9049	17.4547	0.0351828	16.9766	0.0644821	-0.478156	0.000773582
DHSA_MOUSE	Succinate dehydrogenase [ubiquinone] flavoprotein subunit, mitochondrial	DHSA_MOUSE_Cys89	R.AAFGLSEAGFNTACLTK.L	18.4995	18.5408	18.7752	18.1893	18.3016	18.1256	18.6052	0.121374	18.2055	0.0727441	-0.399681	0.0162043
DHSB_MOUSE	Succinate dehydrogenase [ubiquinone] iron-sulfur subunit, mitochondrial	DHSB_MOUSE_Cys70	K.CGPMVLDALIK.I	16.0535	15.8288	15.8709	15.461	15.6958	15.733	15.9177	0.0975457	15.6299	0.120409	-0.287795	0.0584023
DHX9_MOUSE	ATP-dependent RNA helicase A	DHX9_MOUSE_Cys417	R.GATGCGK.T	12.7119	12.7146	12.8828	13.3158	13.3198	13.24	12.7698	0.0799326	13.2919	0.0367111	0.522056	0.00110241
DLDH_MOUSE	Dihydrolipoyl dehydrogenase, mitochondrial	DLDH_MOUSE_Cys477	R.VLGAHILGPGAGEMVNEAALALEYGASCEDIAR.V	14.5589	14.9501	14.9149	14.2551	13.9594	14.0462	14.808	0.176711	14.0869	0.12413	-0.721077	0.00915691
DLDH_MOUSE	Dihydrolipoyl dehydrogenase, mitochondrial	DLDH_MOUSE_Cys80	T.LGGTCLNVGCIPSK.A	25.4324	25.3002	25.1838	25.3001	25.3068	25.0472	25.3055	0.101568	25.218	0.12081	-0.0874381	0.477146
DLDH_MOUSE	Dihydrolipoyl dehydrogenase, mitochondrial	DLDH_MOUSE_Cys85	T.LGGTCLNVGCIPSK.A	25.4324	25.3002	25.1838	25.3001	25.3068	25.0472	25.3055	0.101568	25.218	0.12081	-0.0874381	0.477146
DNJA2_MOUSE	DnaJ homolog subfamily A member 2	DNJA2_MOUSE_Cys143	K.NVLCSACSGQGGK.S	18.1726	18.209	17.4949	17.4497	17.8406	17.6106	17.9588	0.328391	17.6337	0.160411	-0.325164	0.276747
DNJA2_MOUSE	DnaJ homolog subfamily A member 2	DNJA2_MOUSE_Cys146	K.NVLCSACSGQGGK.S	18.1726	18.209	17.4949	17.4497	17.8406	17.6106	17.9588	0.328391	17.6337	0.160411	-0.325164	0.276747
DNJB4_MOUSE	DnaJ homolog subfamily B member 4	DNJB4_MOUSE_Cys175	K.VSLEEIYSGCTK.R	18.3298	18.5186	18.4061	18.3234	18.3805	18.4512	18.4182	0.0775349	18.3851	0.0522702	-0.0331073	0.642871
DNJC2_MOUSE	DnaJ homolog subfamily C member 2	DNJC2_MOUSE_Cys276	R.TLVDNAYSCDPR.I	17.7707	17.852	17.6009	17.6125	17.6215	17.6847	17.7412	0.104633	17.6396	0.032132	-0.101597	0.259541
DNJC7_MOUSE	DnaJ homolog subfamily C member 7	DNJC7_MOUSE_Cys164	R.KVVFCMDR.A	18.4687	18.2669	18.4367	18.3318	18.1119	18.1901	18.3908	0.088535	18.2113	0.0910138	-0.179496	0.11622
DNJC7_MOUSE	DnaJ homolog subfamily C member 7	DNJC7_MOUSE_Cys175	R.ALEFAPACHR.F	17.8634	18.0587	18.0672	17.7285	17.9249	17.7356	17.9964	0.0941577	17.7963	0.0909242	-0.200095	0.0966824
DNJC7_MOUSE	DnaJ homolog subfamily C member 7	DNJC7_MOUSE_Cys58	K.AIDMCPNNASYYGNR.A	17.213	17.251	17.3199	17.0601	17.0222	17.0299	17.2613	0.0442244	17.0374	0.0163668	-0.2239	0.00256086
DOHH_MOUSE	Deoxyhypusine hydroxylase	DOHH_MOUSE_Cys201	K.EAALALAEGLQCGSALFR.H	16.7702	16.8565	16.7926	16.5105	16.4108	16.8673	16.8064	0.0365729	16.5962	0.195962	-0.210255	0.210072
DOPP1_MOUSE	Dolichyldiphosphatase 1	DOPP1_MOUSE_Cys86	R.PCGGPHTAVGTK.Y	16.3616	16.3246	16.1133	15.798	16.1131	15.9888	16.2665	0.109395	15.9666	0.12962	-0.299839	0.0667654
DPH1_MOUSE	Diphthamide biosynthesis protein 1	DPH1_MOUSE_Cys403	R.GLCQPASDK.V	17.2983	17.2834	17.0604	16.9316	16.9253	16.8787	17.214	0.108778	16.9119	0.0235856	-0.30217	0.0184711
DPH3_MOUSE	DPH3 homolog	DPH3_MOUSE_Cys48	K.EDLENGEDVATCPSCSLIIK.V	12.7446	12.9302	12.4735	13.3397	12.3764	12.8286	12.7161	0.187559	12.8482	0.39352	0.132151	0.69021
DPH3_MOUSE	DPH3 homolog	DPH3_MOUSE_Cys51	K.EDLENGEDVATCPSCSLIIK.V	12.7446	12.9302	12.4735	13.3397	12.3764	12.8286	12.7161	0.187559	12.8482	0.39352	0.132151	0.69021
DPOD3_MOUSE	DNA polymerase delta subunit 3	DPOD3_MOUSE_Cys129	K.SNLQNCSK.F	17.438	17.5052	17.7918	17.4618	17.6262	17.5266	17.5783	0.153428	17.5382	0.0676274	-0.0401475	0.751922
DRG2_MOUSE	Developmentally-regulated GTP-binding protein 2	DRG2_MOUSE_Cys241	R.VYMPCLYVYNK.I	14.5773	14.3931	14.1592	13.3263	13.972	13.9548	14.3765	0.171057	13.751	0.300411	-0.625509	0.0627117
DRG2_MOUSE	Developmentally-regulated GTP-binding protein 2	DRG2_MOUSE_Cys270	R.KPNSVVISCGMK.L	20.3604	20.2239	20.3021	20.275	20.0121	20.0673	20.2955	0.0559443	20.1181	0.11321	-0.177302	0.118037
DX39A_MOUSE	ATP-dependent RNA helicase DDX39A	DX39A_MOUSE_Cys164	K.KNCPHVVVGTPGR.I	15.0842	15.074	15.2706	15.2146	15.1625	15.0173	15.143	0.090368	15.1315	0.0834646	-0.0114931	0.901263
DX39A_MOUSE	ATP-dependent RNA helicase DDX39A	DX39A_MOUSE_Cys238	K.EIRPVCR.K	17.6146	17.6229	17.4998	17.8795	17.6727	17.7106	17.5791	0.0561563	17.7543	0.0899049	0.17516	0.0796498
DX39B_MOUSE	Spliceosome RNA helicase Ddx39b	DX39B_MOUSE_Cys165	K.NCPHIVVGTPGR.I	15.4347	16.6605	16.7984	16.5814	16.5321	16.9899	16.2979	0.612967	16.7011	0.205212	0.403242	0.427487
DYHC1_MOUSE	Cytoplasmic dynein 1 heavy chain 1	DYHC1_MOUSE_Cys3387	R.ASLACGPM*VK.W	17.6278	17.8126	17.9798	17.5231	17.6471	17.6272	17.8067	0.143753	17.5991	0.0543784	-0.207616	0.12869
DYHC1_MOUSE	Cytoplasmic dynein 1 heavy chain 1	DYHC1_MOUSE_Cys631	K.VQYPQSQACK.M	17.6299	17.6755	18.2217	17.5501	17.6461	17.474	17.8424	0.268847	17.5567	0.0704354	-0.285665	0.219721
DYL1_MOUSE	Dynein light chain 1, cytoplasmic	DYL1_MOUSE_Cys24	K.NADMSEEMQQDSVECATQALEK.Y	17.9483	17.9206	17.9387	17.7513	17.9152	17.875	17.9359	0.0114561	17.8472	0.069749	-0.0886823	0.150678
DYL1_MOUSE	Dynein light chain 1, cytoplasmic	DYL1_MOUSE_Cys56	K.KYNPTWHCIVGR.N	20.5398	20.6457	20.7729	20.7082	20.7315	20.596	20.6528	0.0952931	20.6786	0.0591548	0.0258139	0.76113
ECM29_MOUSE	Proteasome-associated protein ECM29 homolog	ECM29_MOUSE_Cys1178	R.ESSCLALNDLLR.G	19.5028	19.6233	19.6149	19.4234	19.5437	19.4229	19.5803	0.0549686	19.4633	0.0568268	-0.117037	0.104419
EDC3_MOUSE	Enhancer of mRNA-decapping protein 3	EDC3_MOUSE_Cys137	K.SQDVAISPQQQQCSK.S	14.616	14.5297	14.4814	14.7227	14.4976	14.6604	14.5424	0.0556848	14.6269	0.0948847	0.0844834	0.338553
EDC4_MOUSE	Enhancer of mRNA-decapping protein 4	EDC4_MOUSE_Cys510	K.LFCVHTK.A	18.3583	18.5762	18.3112	18.0623	18.0617	18.0124	18.4152	0.115435	18.0454	0.0233858	-0.369807	0.0113308
EF1A1_MOUSE	Elongation factor 1-alpha 1	EF1A1_MOUSE_Cys234	K.DGSASGTTLLEALDCILPPTR.P	18.3722	18.1456	18.6329	18.9159	18.02	18.178	18.3836	0.199105	18.3713	0.390462	-0.0122681	0.970321
EF1A1_MOUSE	Elongation factor 1-alpha 1	EF1A1_MOUSE_Cys411	K.SGDAAIVDM*VPGKPMCVESFSDYPPLGR.F	20.2512	20.4695	20.4975	20.3799	20.3696	20.2192	20.406	0.110117	20.3229	0.0734248	-0.083156	0.424453
EF1B_MOUSE	Elongation factor 1-beta	EF1B_MOUSE_Cys191	K.KLQIQCVVEDDK.V	20.3241	20.1129	20.1218	19.9585	19.9423	19.9496	20.1863	0.0975217	19.9501	0.00665028	-0.236143	0.0268665
EF1B_MOUSE	Elongation factor 1-beta	EF1B_MOUSE_Cys50	K.SYIEGYVPSQADVAVFEAVSGPPPADLCHALR.W	13.7999	13.2836	13.4582	13.7708	13.3154	13.5704	13.5139	0.21446	13.5522	0.186359	0.0383311	0.857978
EF1G_MOUSE	Elongation factor 1-gamma	EF1G_MOUSE_Cys194	R.WFLTCINQPQFR.A	21.1017	21.0986	21.1713	21.0379	20.9191	20.9464	21.1239	0.0335599	20.9678	0.0508212	-0.156072	0.0222747
EF2_MOUSE	Elongation factor 2	EF2_MOUSE_Cys369	R.CELLYEGPPDDEAAMGIK.S	20.3374	20.403	20.3625	20.2234	20.3111	20.0161	20.3676	0.0270216	20.1835	0.12367	-0.184106	0.108847
EF2_MOUSE	Elongation factor 2	EF2_MOUSE_Cys41	K.STLTDSLVCK.A	21.4689	21.4112	21.5735	21.3086	21.3976	21.237	21.4845	0.0671354	21.3144	0.0656877	-0.170139	0.0625233
EF2_MOUSE	Elongation factor 2	EF2_MOUSE_Cys466	R.YVEPIEDVPCGNIVGLVGVDQFLVK.T	19.3638	19.6588	20.0098	19.8286	19.7682	19.5103	19.6775	0.264041	19.7024	0.138039	0.0249133	0.911569
EF2_MOUSE	Elongation factor 2	EF2_MOUSE_Cys591	R.ETVSEESNVLCLSK.S	20.0323	20.1256	20.1308	19.9198	19.9817	19.8219	20.0963	0.045268	19.9078	0.0657873	-0.188475	0.0288958
EF2_MOUSE	Elongation factor 2	EF2_MOUSE_Cys651	R.KIWCFGPDGTGPNILTDITK.G	20.7451	20.6203	21.003	20.5149	20.6234	20.4314	20.7895	0.159339	20.5232	0.0786278	-0.266237	0.101453
EF2_MOUSE	Elongation factor 2	EF2_MOUSE_Cys693	K.EGALCEENMR.G	17.7161	17.7893	17.8666	17.5877	17.6502	17.4256	17.7906	0.0614294	17.5545	0.0946402	-0.236145	0.0415593
EF2_MOUSE	Elongation factor 2	EF2_MOUSE_Cys728	R.CLYASVLTAQPR.L	21.4483	21.4083	21.4231	21.0534	21.0775	21.0311	21.4266	0.0165249	21.054	0.0189616	-0.372546	3.06957e-05
EF2_MOUSE	Elongation factor 2	EF2_MOUSE_Cys751	R.LM*EPIYLVEIQCPEQVVGGIYGVLNR.K	18.6846	15.3972	18.8994	18.4305	16.9284	16.9921	17.6604	1.60271	17.4503	0.693565	-0.210057	0.873183
EI2BA_MOUSE	Translation initiation factor eIF-2B subunit alpha	EI2BA_MOUSE_Cys115	K.IANLCHTFIK.D	17.7373	17.6365	17.958	17.7131	17.4573	17.5222	17.7773	0.134283	17.5642	0.108561	-0.213054	0.155944
EI2BA_MOUSE	Translation initiation factor eIF-2B subunit alpha	EI2BA_MOUSE_Cys218	K.IGTNQM*AVCAK.A	20.7021	20.7001	20.8525	20.3925	20.43	20.4875	20.7516	0.0713898	20.4367	0.0390638	-0.3149	0.00542571
EI2BD_MOUSE	Translation initiation factor eIF-2B subunit delta	EI2BD_MOUSE_Cys130	R.KGEQGGVPPQACPSTAGETTSGVK.R	12.2957	11.7037	11.9812	11.5737	12.5852	12.0242	11.9935	0.241847	12.061	0.413783	0.0674857	0.851872
EIF3A_MOUSE	Eukaryotic translation initiation factor 3 subunit A	EIF3A_MOUSE_Cys478	R.HCDLQVR.I	17.5838	17.6793	17.7016	17.4977	17.5227	17.428	17.6549	0.0510902	17.4828	0.0400409	-0.172083	0.019962
EIF3A_MOUSE	Eukaryotic translation initiation factor 3 subunit A	EIF3A_MOUSE_Cys58	K.YLELCVDLRK.S	17.8726	17.8191	18.1887	17.9758	17.9714	17.7706	17.9601	0.163114	17.9059	0.0957073	-0.0542017	0.705988
EIF3C_MOUSE	Eukaryotic translation initiation factor 3 subunit C	EIF3C_MOUSE_Cys441	R.GCILTLVER.M	19.8978	19.8588	19.9819	19.8888	19.9204	19.8485	19.9128	0.0513591	19.8859	0.0294587	-0.026896	0.555567
EIF3D_MOUSE	Eukaryotic translation initiation factor 3 subunit D	EIF3D_MOUSE_Cys19	K.FMTPVIQDNPSGWGPCAVPEQFR.D	16.8503	17.2172	17.1163	17.0496	17.0993	17.3125	17.0613	0.15476	17.1538	0.114021	0.0925163	0.533459
EIF3D_MOUSE	Eukaryotic translation initiation factor 3 subunit D	EIF3D_MOUSE_Cys258	K.TQGNVFATDAILATLMSCTR.S	17.8446	17.4679	18.2932	18.0794	17.8786	18.0484	17.8686	0.337338	18.0021	0.0882696	0.133526	0.616884
EIF3D_MOUSE	Eukaryotic translation initiation factor 3 subunit D	EIF3D_MOUSE_Cys327	R.NLAMEATYINHNFSQQCLR.M	18.297	17.9191	17.8655	17.8064	17.8797	17.8082	18.0272	0.191991	17.8314	0.0341446	-0.195802	0.228629
EIF3E_MOUSE	Eukaryotic translation initiation factor 3 subunit E	EIF3E_MOUSE_Cys345	R.LFIFETFCR.I	19.3061	19.2383	19.1856	19.2323	19.1976	19.137	19.2433	0.04934	19.189	0.0393917	-0.0543555	0.290313
EIF3I_MOUSE	Eukaryotic translation initiation factor 3 subunit I	EIF3I_MOUSE_Cys76	K.HVLTGSADNSCR.L	11.6932	11.0435	11.1636	11.7936	10.9571	10.8836	11.3001	0.282254	11.2114	0.412732	-0.0886941	0.814283
EIF3K_MOUSE	Eukaryotic translation initiation factor 3 subunit K	EIF3K_MOUSE_Cys85	K.ALTNLPHTDFTLCK.C	20.4115	20.0396	20.2249	20.0026	20.1342	20.0573	20.2253	0.151843	20.0647	0.0539477	-0.160643	0.231393
EIF3L_MOUSE	Eukaryotic translation initiation factor 3 subunit L	EIF3L_MOUSE_Cys417	K.GDPQVYEELFSYACPK.F	18.6465	18.4802	18.4676	18.6789	18.5787	18.2286	18.5314	0.0814977	18.4954	0.193031	-0.0360339	0.819807
EIF3M_MOUSE	Eukaryotic translation initiation factor 3 subunit M	EIF3M_MOUSE_Cys125	R.YTVYCSLIK.V	14.6646	14.8778	14.9627	14.6823	14.9354	14.1009	14.835	0.12539	14.5729	0.349337	-0.26218	0.374342
EIF3M_MOUSE	Eukaryotic translation initiation factor 3 subunit M	EIF3M_MOUSE_Cys134	K.VAASCGAIQYIPTELDQVRK.W	17.6837	17.8952	17.8449	17.651	17.7595	17.6285	17.8079	0.0902002	17.6797	0.0571795	-0.12826	0.164656
ELMO1_MOUSE	Engulfment and cell motility protein 1	ELMO1_MOUSE_Cys411	R.EDKHECPFGR.S	16.1347	16.0264	15.9751	16.0018	15.7795	15.7147	16.0454	0.0665146	15.832	0.122968	-0.213406	0.0970256
ELMO1_MOUSE	Engulfment and cell motility protein 1	ELMO1_MOUSE_Cys622	K.DCPHMK.E	18.0457	18.0047	18.0309	18.0558	17.9283	17.8174	18.0271	0.0169448	17.9338	0.0974218	-0.0932948	0.253008
ELOB_MOUSE	Transcription elongation factor B polypeptide 2	ELOB_MOUSE_Cys60	K.TLGECGFTSQTARPQAPATVGLAFR.A	17.5167	17.0154	17.1829	16.8934	17.2089	16.8185	17.2383	0.208379	16.9736	0.169182	-0.264729	0.23554
ELOC_MOUSE	Transcription elongation factor B polypeptide 1	ELOC_MOUSE_Cys11	K.TYGGCEGPDAMYVK.L	18.1693	18.041	18.0058	17.6497	17.6802	17.5665	18.072	0.0702957	17.6321	0.0480731	-0.439885	0.00186772
EMAL2_MOUSE	Echinoderm microtubule-associated protein-like 2	EMAL2_MOUSE_Cys395	R.AQFVTCGQDK.L	19.8938	19.9989	20.0545	19.8501	19.8407	19.8393	19.9824	0.0666253	19.8434	0.00479596	-0.139024	0.0422474
ENOA_MOUSE	Alpha-enolase	ENOA_MOUSE_Cys119	K.FGANAILGVSLAVCK.A	19.4064	19.5482	19.7108	19.687	19.4888	19.5673	19.5551	0.12437	19.581	0.0814969	0.0259153	0.817443
ENOA_MOUSE	Alpha-enolase	ENOA_MOUSE_Cys337	K.SCNCLLLK.V	23.3054	23.2459	23.5585	22.9497	22.9519	22.9901	23.3699	0.135516	22.9639	0.0185559	-0.406051	0.0137148
ENOA_MOUSE	Alpha-enolase	ENOA_MOUSE_Cys339	K.SC#NCLLLK.V	22.4912	22.4784	22.6649	22.1475	22.2962	22.1918	22.5448	0.0850493	22.2118	0.0623417	-0.333013	0.0111082
ENOA_MOUSE	Alpha-enolase	ENOA_MOUSE_Cys389	R.SGETEDTFIADLVVGLCTGQIK.T	19.5891	19.7254	19.8037	19.1417	19.2632	19.2208	19.7061	0.0886513	19.2086	0.0503338	-0.497486	0.00231177
ENOB_MOUSE	Beta-enolase	ENOB_MOUSE_Cys357	K.VNQIGSVTESIQACK.L	20.7042	20.7755	20.9965	20.5754	20.539	20.5211	20.8254	0.124415	20.5452	0.0226071	-0.280235	0.0350468
ENPL_MOUSE	Endoplasmin	ENPL_MOUSE_Cys576	K.GYEVIYLTEPVDEYCIQALPEFDGKR.F	16.8598	16.7433	16.8672	16.6553	17.0004	17.2646	16.8234	0.0567594	16.9734	0.249481	0.15001	0.453626
ENPL_MOUSE	Endoplasmin	ENPL_MOUSE_Cys645	R.LTESPCALVASQYGWSGNMER.I	17.5522	17.0265	17.5341	17.2143	17.319	17.1181	17.371	0.243676	17.2171	0.0820621	-0.153826	0.445161
ENV1_MOUSE	MLV-related proviral Env polyprotein	ENV1_MOUSE_Cys131	K.WGCETTGQAYWKPSSSWDLISLK.R	20.1853	19.8683	19.4608	19.235	19.2056	18.915	19.8381	0.296537	19.1185	0.14439	-0.719627	0.0367302
ENV1_MOUSE	MLV-related proviral Env polyprotein	ENV1_MOUSE_Cys162	Q.NQGPCYDSSAVSSDIK.G	18.1406	17.7488	17.9852	17.3723	17.5679	17.5033	17.9582	0.161072	17.4812	0.0813526	-0.477045	0.0201445
ENV1_MOUSE	MLV-related proviral Env polyprotein	ENV1_MOUSE_Cys181	R.CNPLVLEFTDAGKK.A	22.7923	22.6614	22.3786	21.8408	21.9968	21.8361	22.6108	0.172647	21.8913	0.0746761	-0.719494	0.00565705
ENV1_MOUSE	MLV-related proviral Env polyprotein	ENV1_MOUSE_Cys356	K.LTLSEVTGQGLCVGAVPK.T	18.475	18.4657	18.4288	17.6829	18.1987	18.228	18.4565	0.0199272	18.0365	0.25037	-0.419979	0.0772601
ENV2_MOUSE	Retrovirus-related Env polyprotein from Fv-4 locus	ENV2_MOUSE_Cys564	K.EGGLCAALKEECCFYADHTGLVR.D	16.8553	16.3733	16.5435	16.3499	16.6154	16.0935	16.5907	0.19959	16.3529	0.213053	-0.237764	0.313568
ENV2_MOUSE	Retrovirus-related Env polyprotein from Fv-4 locus	ENV2_MOUSE_Cys571	K.EGGLCAALKEECCFYADHTGLVR.D	16.8553	16.3733	16.5435	16.3499	16.6154	16.0935	16.5907	0.19959	16.3529	0.213053	-0.237764	0.313568
ENV2_MOUSE	Retrovirus-related Env polyprotein from Fv-4 locus	ENV2_MOUSE_Cys572	K.EGGLCAALKEECCFYADHTGLVR.D	16.8553	16.3733	16.5435	16.3499	16.6154	16.0935	16.5907	0.19959	16.3529	0.213053	-0.237764	0.313568
EOGT_MOUSE	EGF domain-specific O-linked N-acetylglucosamine transferase	EOGT_MOUSE_Cys187	R.FKEDFLQGGEIGGYCK.L	18.0296	17.7454	17.9262	17.7639	17.7545	17.7349	17.9004	0.11747	17.7511	0.0121086	-0.149274	0.14836
EPS15_MOUSE	Epidermal growth factor receptor substrate 15	EPS15_MOUSE_Cys784	K.VGTPTRPCPPPPGK.R	17.5258	17.3087	17.5078	17.2585	17.3524	17.1936	17.4475	0.0983861	17.2682	0.0652256	-0.179277	0.0982211
ERD23_MOUSE	ER lumen protein retaining receptor 3	ERD23_MOUSE_Cys29	K.SCAGISGK.S	18.7543	18.9501	18.8345	18.8399	18.8832	18.7983	18.8463	0.0803749	18.8405	0.0346639	-0.0058132	0.929688
ERF3A_MOUSE	Eukaryotic peptide chain release factor GTP-binding subunit ERF3A	ERF3A_MOUSE_Cys464	K.LESGSICK.G	21.7964	21.9148	21.9076	21.7346	21.7543	21.7334	21.8729	0.0542044	21.7408	0.00955674	-0.132168	0.0273796
ERF3A_MOUSE	Eukaryotic peptide chain release factor GTP-binding subunit ERF3A	ERF3A_MOUSE_Cys518	K.GIEEEEILPGFILCDLNNLCHSGR.T	18.491	18.6514	18.4629	18.3738	18.4874	18.3317	18.5351	0.0830416	18.3977	0.0657489	-0.137437	0.140404
ERF3A_MOUSE	Eukaryotic peptide chain release factor GTP-binding subunit ERF3A	ERF3A_MOUSE_Cys524	K.GIEEEEILPGFILCDLNNLCHSGR.T	18.491	18.6514	18.4629	18.3738	18.4874	18.3317	18.5351	0.0830416	18.3977	0.0657489	-0.137437	0.140404
ERLN1_MOUSE	Erlin-1	ERLN1_MOUSE_Cys310	K.IYFGSNIPSMFVDSSCALK.Y	19.9888	19.6399	19.2492	19.6229	19.6161	19.1541	19.6259	0.302115	19.4644	0.219417	-0.161574	0.573634
ERO1A_MOUSE	ERO1-like protein alpha	ERO1A_MOUSE_Cys237	K.SKENTFYNWLEGLCVEK.R	14.4513	14.8919	14.2322	15.1048	14.1311	14.5023	14.5252	0.274357	14.5794	0.401237	0.0542774	0.882172
ERO1A_MOUSE	ERO1-like protein alpha	ERO1A_MOUSE_Cys387	R.IMDCVGCFKCR.L	19.3213	19.0076	18.5164	18.7754	18.8674	18.3341	18.9484	0.331244	18.659	0.232757	-0.289467	0.36913
ERO1A_MOUSE	ERO1-like protein alpha	ERO1A_MOUSE_Cys390	R.IMDCVGCFKCR.L	19.3213	19.0076	18.5164	18.7754	18.8674	18.3341	18.9484	0.331244	18.659	0.232757	-0.289467	0.36913
ERO1A_MOUSE	ERO1-like protein alpha	ERO1A_MOUSE_Cys393	R.IMDCVGCFKCR.L	19.3213	19.0076	18.5164	18.7754	18.8674	18.3341	18.9484	0.331244	18.659	0.232757	-0.289467	0.36913
ERO1B_MOUSE	ERO1-like protein beta	ERO1B_MOUSE_Cys130	K.ELDDCEQANK.L	17.2708	17.2543	16.8598	16.5081	16.5501	16.3237	17.1283	0.190014	16.4606	0.0983501	-0.66766	0.0115729
ERP29_MOUSE	Endoplasmic reticulum resident protein 29	ERP29_MOUSE_Cys159	K.GQGVYLGM*PGCLPAYDALAGEFIK.A	20.5228	20.5208	20.5228	20.6459	20.5154	20.2542	20.5221	0.000953255	20.4719	0.162825	-0.0502567	0.685003
ESTD_MOUSE	S-formylglutathione hydrolase	ESTD_MOUSE_Cys11	R.CFGGLQK.V	24.4269	24.2964	24.1771	23.7372	23.9342	23.8169	24.3001	0.102005	23.8295	0.0809036	-0.470666	0.00692191
ESTD_MOUSE	S-formylglutathione hydrolase	ESTD_MOUSE_Cys176	R.SVSAFAPICNPVLCSWGK.K	19.7455	19.7783	19.8572	19.7744	19.855	19.6392	19.7937	0.0468771	19.7562	0.0890272	-0.0374701	0.626277
ESTD_MOUSE	S-formylglutathione hydrolase	ESTD_MOUSE_Cys181	R.SVSAFAPIC#NPVLCSWGK.K	20.1349	19.9484	20.2154	19.9654	20.0608	19.9152	20.0996	0.111847	19.9805	0.0604047	-0.119085	0.255834
ESTD_MOUSE	S-formylglutathione hydrolase	ESTD_MOUSE_Cys206	K.AYDATCLVK.A	21.1358	21.2248	21.179	21.1638	21.0608	20.9864	21.1799	0.0363145	21.0703	0.0727411	-0.109536	0.129441
ESYT1_MOUSE	Extended synaptotagmin-1	ESYT1_MOUSE_Cys360	R.VGTQTFCSR.V	19.91	20.0113	20.0499	19.7467	19.8126	19.716	19.9904	0.0590142	19.7585	0.0402904	-0.231943	0.0101034
ETFD_MOUSE	Electron transfer flavoprotein-ubiquinone oxidoreductase, mitochondrial	ETFD_MOUSE_Cys247	K.VTVFAEGCHGHLAK.Q	16.4885	16.9148	16.728	16.3897	16.0101	16.0822	16.7104	0.174487	16.1607	0.164576	-0.549763	0.0316303
ETFD_MOUSE	Electron transfer flavoprotein-ubiquinone oxidoreductase, mitochondrial	ETFD_MOUSE_Cys265	R.ASCDAQTYGIGLK.E	18.3992	18.6694	18.5389	18.1024	18.0231	17.9489	18.5358	0.110321	18.0248	0.0626908	-0.511021	0.00469534
ETFD_MOUSE	Electron transfer flavoprotein-ubiquinone oxidoreductase, mitochondrial	ETFD_MOUSE_Cys560	R.FCPAGVYEFVPLEQGDGFR.L	17.2506	17.2303	17.3086	16.6587	16.5047	16.4837	17.2632	0.0332028	16.549	0.0780449	-0.714142	0.000284891
ETHE1_MOUSE	Persulfide dioxygenase ETHE1, mitochondrial	ETHE1_MOUSE_Cys170	R.TDFQQGCAK.T	17.5497	17.5523	17.2153	17.2388	17.4119	17.0784	17.4391	0.158254	17.243	0.136188	-0.196041	0.254923
EWS_MOUSE	RNA-binding protein EWS	EWS_MOUSE_Cys523	R.AGDWQCPNPGCGNQNFAWR.T	17.5774	17.4817	17.1781	17.3469	17.4439	17.161	17.4124	0.170205	17.3172	0.117373	-0.0951517	0.550638
EWS_MOUSE	RNA-binding protein EWS	EWS_MOUSE_Cys528	R.AGDWQC#PNPGCGNQNFAWR.T	18.7711	18.5969	18.3928	18.6716	18.507	18.3696	18.5869	0.154592	18.5161	0.123487	-0.0708957	0.638997
EWS_MOUSE	RNA-binding protein EWS	EWS_MOUSE_Cys539	R.TECNQCK.A	18.516	18.4489	18.6713	18.083	18.2886	18.1977	18.5454	0.0931529	18.1898	0.0841147	-0.35567	0.0160285
EWS_MOUSE	RNA-binding protein EWS	EWS_MOUSE_Cys542	R.TECNQCK.A	16.4285	16.6745	16.4152	16.1502	16.1189	16.0398	16.5061	0.119206	16.103	0.0464842	-0.403092	0.0112003
EXOS3_MOUSE	Exosome complex component RRP40	EXOS3_MOUSE_Cys67	R.VVCGPGLR.R	18.8541	19.0495	19.018	19.154	19.1088	19.0715	18.9739	0.0856993	19.1114	0.0337027	0.137546	0.102223
EZH1_MOUSE	Histone-lysine N-methyltransferase EZH1	EZH1_MOUSE_Cys696	R.FANHSVNPNCYAK.V	17.5993	17.5398	17.7971	17.812	17.7626	17.7405	17.6454	0.109986	17.7717	0.0298875	0.126265	0.192245
F10A1_MOUSE	Hsc70-interacting protein	F10A1_MOUSE_Cys170	K.LQKPNAAIRDCDR.A	17.5144	17.3834	17.4384	17.2921	17.5347	17.4236	17.4454	0.0537218	17.4168	0.0991677	-0.0286019	0.737991
F10A1_MOUSE	Hsc70-interacting protein	F10A1_MOUSE_Cys208	R.LLGHWEEAAHDLALACK.L	15.8654	15.3718	15.1681	15.5678	15.0906	15.8338	15.4684	0.29277	15.4974	0.307472	0.0289301	0.927865
F120A_MOUSE	Constitutive coactivator of PPAR-gamma-like protein 1	F120A_MOUSE_Cys692	R.AFLACMR.S	18.0273	18.0494	17.9527	17.9678	17.8695	17.6764	18.0098	0.0413557	17.8379	0.121047	-0.171908	0.130154
F91A1_MOUSE	Protein FAM91A1	F91A1_MOUSE_Cys750	K.IATHGLCR.K	14.1817	14.098	14.4336	14.1162	14.6639	14.051	14.2378	0.14262	14.2771	0.274822	0.0392893	0.866305
FA49B_MOUSE	Protein FAM49B	FA49B_MOUSE_Cys223	K.NLPIENTTDCLSTMASVC#R.V	16.4945	16.5209	16.7113	15.8428	16.2718	16.0999	16.5755	0.0965651	16.0715	0.176288	-0.504035	0.0238782
FA98A_MOUSE	Protein FAM98A	FA98A_MOUSE_Cys292	K.TACAINK.V	19.3395	19.5405	19.3543	19.22	19.4231	19.2227	19.4114	0.0914566	19.2886	0.0951115	-0.122827	0.258389
FA98B_MOUSE	Protein FAM98B	FA98B_MOUSE_Cys183	K.VKDILCR.V	19.5911	19.702	19.4681	19.567	19.5466	19.418	19.5871	0.0955633	19.5106	0.0659496	-0.0765167	0.404112
FAM3C_MOUSE	Protein FAM3C	FAM3C_MOUSE_Cys86	K.ICLEDNVLMSGVK.N	19.5298	19.571	19.1256	19.0752	19.0378	18.9219	19.4088	0.200984	19.0116	0.0652704	-0.397182	0.0565027
FAS_MOUSE	Fatty acid synthase	FAS_MOUSE_Cys1222	K.ACVDTALENLSTLK.M	17.8453	17.5744	17.9325	17.8648	17.8356	17.7745	17.7841	0.152478	17.825	0.0376039	0.040858	0.731569
FAS_MOUSE	Fatty acid synthase	FAS_MOUSE_Cys135	R.DPETLLGYSMVGCQR.A	18.8227	18.8303	18.742	18.79	18.631	18.6266	18.7983	0.0399664	18.6825	0.0760187	-0.115773	0.129285
FAS_MOUSE	Fatty acid synthase	FAS_MOUSE_Cys1874	K.TFCPAHK.S	20.6308	20.5714	20.7547	20.4316	20.3618	20.305	20.6523	0.0763437	20.3661	0.0517681	-0.286221	0.0117984
FAS_MOUSE	Fatty acid synthase	FAS_MOUSE_Cys2084	R.ISSCMEVLDLFLNQPHAVLSSFVLAEK.K	16.7054	16.6855	17.254	16.6105	16.7277	16.3502	16.8817	0.263441	16.5628	0.157746	-0.318834	0.215903
FAS_MOUSE	Fatty acid synthase	FAS_MOUSE_Cys212	K.LGMLSPDGTCR.S	19.2363	19.0985	19.1857	19.039	18.97	19.0034	19.1735	0.0569181	19.0041	0.0282021	-0.169348	0.0196001
FKB11_MOUSE	Peptidyl-prolyl cis-trans isomerase FKBP11	FKB11_MOUSE_Cys104	K.QVIPGLEQSLLDMCVGEK.R	18.7909	18.9975	19.0087	19.0514	19.2197	18.969	18.9324	0.100163	19.08	0.104305	0.147632	0.222293
FKBP4_MOUSE	Peptidyl-prolyl cis-trans isomerase FKBP4	FKBP4_MOUSE_Cys342	K.LQAFSAAIESCNK.A	19.3274	19.2291	19.2754	19.0317	19.067	18.9129	19.2773	0.0401652	19.0038	0.0659106	-0.273444	0.00743671
FKBP4_MOUSE	Peptidyl-prolyl cis-trans isomerase FKBP4	FKBP4_MOUSE_Cys396	K.TQLAVCQQR.T	17.4092	17.3714	17.389	17.101	17.0029	16.9998	17.3899	0.0154227	17.0346	0.046994	-0.355323	0.000528535
FLII_MOUSE	Protein flightless-1 homolog	FLII_MOUSE_Cys1069	R.TNGSALCTR.C	14.946	15.0925	14.9728	14.8677	14.8675	14.7532	15.0037	0.0636783	14.8295	0.0539411	-0.174273	0.0418345
FLNA_MOUSE	Filamin-A	FLNA_MOUSE_Cys1018	K.IVSPSGAAVPCKVEPGLGADNSVVR.F	22.4938	22.4711	22.7659	22.4037	22.4367	22.5863	22.5769	0.13393	22.4756	0.0794404	-0.101316	0.409569
FLNA_MOUSE	Filamin-A	FLNA_MOUSE_Cys1157	K.AHVAPCFDASK.V	19.1509	19.2604	19.4519	19.4276	19.3174	19.1758	19.2877	0.124386	19.3069	0.103082	0.0191823	0.874791
FLNA_MOUSE	Filamin-A	FLNA_MOUSE_Cys1260	K.LQVEPAVDTSGVQCYGPGIEGQGVFR.E	18.3497	18.776	18.4312	18.2441	18.2654	18.3801	18.519	0.18477	18.2965	0.0597337	-0.222485	0.18048
FLNA_MOUSE	Filamin-A	FLNA_MOUSE_Cys1453	K.VPVHDVTDASKVKCSGPGLSPGMVR.A	17.529	17.5817	17.5829	17.0717	17.3781	17.1528	17.5645	0.0251271	17.2009	0.129609	-0.363646	0.0176107
FLNA_MOUSE	Filamin-A	FLNA_MOUSE_Cys2107	R.VTYCPTEPGNYIINIK.F	17.0865	16.9837	17.6019	17.2564	16.9882	17.1428	17.2241	0.270469	17.1291	0.109944	-0.0949185	0.669561
FLNA_MOUSE	Filamin-A	FLNA_MOUSE_Cys2476	K.MDCQECPEGYR.V	18.1882	18.2126	18.4104	18.0268	17.9823	18.0842	18.2704	0.0994824	18.0311	0.0416911	-0.239318	0.0349254
FLNA_MOUSE	Filamin-A	FLNA_MOUSE_Cys2479	K.MDCQECPEGYR.V	16.4067	16.6792	16.5846	16.4519	16.363	16.3756	16.5568	0.112977	16.3969	0.0392806	-0.159961	0.131554
FLNA_MOUSE	Filamin-A	FLNA_MOUSE_Cys2582	K.SNFTVDCSK.A	20.4093	20.3987	20.6731	20.2603	20.2262	20.2027	20.4937	0.126918	20.2297	0.023647	-0.263964	0.0444951
FLNA_MOUSE	Filamin-A	FLNA_MOUSE_Cys478	R.SPYTVTVGQACNPAACR.A	17.3861	17.7208	17.9424	17.7179	17.5368	17.6923	17.6831	0.228649	17.649	0.0800116	-0.0341166	0.851844
FLNA_MOUSE	Filamin-A	FLNA_MOUSE_Cys483	R.SPYTVTVGQAC#NPAACR.A	18.4881	18.7503	19.012	18.6604	18.5068	18.567	18.7501	0.213915	18.5781	0.0631711	-0.172056	0.336623
FLNA_MOUSE	Filamin-A	FLNA_MOUSE_Cys574	K.VGTECGNQK.V	18.9467	18.8789	19.3704	18.9605	18.8915	18.8748	19.0654	0.217479	18.9089	0.0370894	-0.156421	0.372749
FLNA_MOUSE	Filamin-A	FLNA_MOUSE_Cys649	R.YWPQEAGEYAVHVLCNSEDIR.L	18.7989	18.5295	18.6808	18.7162	18.6454	18.4751	18.6697	0.110245	18.6123	0.101163	-0.0574722	0.61584
FLNA_MOUSE	Filamin-A	FLNA_MOUSE_Cys733	K.DNGNGTYSCSYVPR.K	15.8217	15.698	16.3532	15.8177	15.8251	15.8566	15.9576	0.284232	15.8332	0.0168495	-0.124456	0.569933
FLNA_MOUSE	Filamin-A	FLNA_MOUSE_Cys810	K.CAPGVVGPTEADIDFDIIR.N	16.7279	16.7762	17.1194	16.6546	16.4924	16.6757	16.8745	0.174292	16.6076	0.0818701	-0.266948	0.121483
FLNA_MOUSE	Filamin-A	FLNA_MOUSE_Cys841	K.YTPCGAGSYTIMVLFADQATPTSPIR.V	17.1742	17.3894	16.9705	16.8005	17.5132	17.1961	17.178	0.171009	17.1699	0.291512	-0.00809332	0.974607
FLNB_MOUSE	Filamin-B	FLNB_MOUSE_Cys1438	R.ACIPQSFTVDSSK.A	18.2776	18.4403	18.5863	18.5221	18.3583	18.2933	18.4347	0.126123	18.3912	0.0962679	-0.043484	0.718066
FLNB_MOUSE	Filamin-B	FLNB_MOUSE_Cys1617	K.CLATGPGIAPTVK.T	18.8598	18.985	19.1266	18.7696	18.7388	18.8426	18.9905	0.108991	18.7836	0.0435248	-0.20684	0.067308
FLNB_MOUSE	Filamin-B	FLNB_MOUSE_Cys2501	R.SSTETCYSAIPK.S	17.8333	17.7898	18.0821	17.8457	17.7874	17.9371	17.9018	0.128787	17.8567	0.0616119	-0.0450036	0.67881
FLNB_MOUSE	Filamin-B	FLNB_MOUSE_Cys416	R.CVYKPVQPGPHVVK.V	14.9142	15.4898	15.3758	15.2887	15.0926	15.2809	15.2599	0.248848	15.2207	0.0906403	-0.0391688	0.844547
FLNB_MOUSE	Filamin-B	FLNB_MOUSE_Cys450	K.SPFGVQIGEACNPNAC#R.A	17.0701	17.1818	17.2841	17.3705	17.2533	17.2326	17.1787	0.0874277	17.2855	0.0606888	0.10682	0.228783
FLNB_MOUSE	Filamin-B	FLNB_MOUSE_Cys706	R.MDGTYACSYTPLK.A	18.4296	18.6071	18.8642	18.5834	18.4867	18.5551	18.6336	0.178419	18.5417	0.0406118	-0.0919007	0.516753
FLNB_MOUSE	Filamin-B	FLNB_MOUSE_Cys991	K.VVPCLVAPVAGR.E	19.5385	19.3969	19.9159	19.7412	19.5444	19.5873	19.6171	0.219063	19.6243	0.0845022	0.00721436	0.967423
FLT3_MOUSE	Receptor-type tyrosine-protein kinase FLT3	FLT3_MOUSE_Cys831	K.ICDFGLAR.D	19.9746	19.8566	19.8566	19.6262	19.6407	19.5327	19.8959	0.0556176	19.5999	0.047874	-0.296073	0.00466466
FPPS_MOUSE	Farnesyl pyrophosphate synthase	FPPS_MOUSE_Cys117	R.GQICWYQKPGIGLDAINDALLLEASIYR.L	16.8751	16.2116	16.7905	16.2605	16.2233	15.9301	16.6258	0.294868	16.138	0.147731	-0.487817	0.104621
FPPS_MOUSE	Farnesyl pyrophosphate synthase	FPPS_MOUSE_Cys332	K.SLIEQCSAPLPPSIFMELANK.I	19.2383	19.2458	19.4685	19.3683	19.5094	19.2686	19.3175	0.106765	19.3821	0.0987926	0.0645997	0.56404
FRIH_MOUSE	Ferritin heavy chain	FRIH_MOUSE_Cys103	K.KPDRDDWESGLNAMECALHLEK.S	14.7226	14.4621	15.2625	15.0639	14.799	14.6126	14.8157	0.333308	14.8251	0.185163	0.00940649	0.97384
FRIH_MOUSE	Ferritin heavy chain	FRIH_MOUSE_Cys131	K.NDPHLCDFIETYYLSEQVK.S	16.9831	16.9994	16.6652	16.9598	16.9004	17.0034	16.8826	0.153839	16.9545	0.0421824	0.0719357	0.558314
FRIL1_MOUSE	Ferritin light chain 1	FRIL1_MOUSE_Cys127	H.LCDFLESHYLDK.E	17.0775	17.0163	17.0044	16.9408	17.1173	17.0641	17.0327	0.0320526	17.0407	0.0739402	0.0079901	0.895268
FUBP1_MOUSE	Far upstream element-binding protein 1	FUBP1_MOUSE_Cys128	R.IQQESGCK.I	20.0502	20.0402	20.2744	20.4095	20.2233	20.3138	20.1216	0.108104	20.3155	0.076013	0.193941	0.106573
FUBP1_MOUSE	Far upstream element-binding protein 1	FUBP1_MOUSE_Cys144	R.SCMLTGTPESVQSAK.R	18.0547	17.7543	18.1225	18.0233	18.0496	17.6859	17.9772	0.159994	17.9196	0.165573	-0.0575783	0.741447
FUBP2_MOUSE	Far upstream element-binding protein 2	FUBP2_MOUSE_Cys177	K.IQQDSGCK.V	16.9588	16.9668	17.1205	16.9726	16.8219	16.9885	17.0154	0.0744388	16.9277	0.0750501	-0.0876846	0.305839
FUBP2_MOUSE	Far upstream element-binding protein 2	FUBP2_MOUSE_Cys297	K.VQQACEMVMDILR.E	19.6031	19.2927	19.4257	19.5177	19.267	19.2303	19.4405	0.127159	19.3384	0.127722	-0.102132	0.467797
FUS_MOUSE	RNA-binding protein FUS	FUS_MOUSE_Cys421	R.AGDWKCPNPTCENMNFSWR.N	18.9446	18.97	18.9611	19.1624	18.9734	18.8207	18.9586	0.0105605	18.9855	0.139785	0.0268992	0.799537
FUS_MOUSE	RNA-binding protein FUS	FUS_MOUSE_Cys426	R.AGDWKCPNPTCENMNFSWR.N	17.5375	17.6847	17.6805	18.0255	17.5869	17.3887	17.6342	0.0684112	17.667	0.266047	0.032798	0.874109
FUS_MOUSE	RNA-binding protein FUS	FUS_MOUSE_Cys437	R.NECNQCK.A	14.481	14.6825	14.3472	14.4544	14.4626	14.1683	14.5036	0.137829	14.3618	0.136858	-0.141795	0.360212
FUS_MOUSE	RNA-binding protein FUS	FUS_MOUSE_Cys440	R.NEC#NQCK.A	18.8193	18.5629	18.8644	18.578	18.7699	18.5601	18.7489	0.132803	18.636	0.0949681	-0.112859	0.383628
G3P_MOUSE	Glyceraldehyde-3-phosphate dehydrogenase	G3P_MOUSE_Cys150	K.IVSNASCTTNCLAPLAK.V	23.282	23.0438	23.5112	23.0744	23.0925	23.0261	23.279	0.190833	23.0643	0.0280318	-0.214648	0.190642
G3P_MOUSE	Glyceraldehyde-3-phosphate dehydrogenase	G3P_MOUSE_Cys154	K.IVSNASCTTNCLAPLAK.V	21.1226	21.1566	21.2588	21.0937	21.0434	21.0401	21.1793	0.0578774	21.0591	0.0245467	-0.120274	0.0537832
G3P_MOUSE	Glyceraldehyde-3-phosphate dehydrogenase	G3P_MOUSE_Cys245	R.VPTPNVSVVDLTCRLEKPAK.Y	19.7018	20.74	20.2548	19.9728	19.8344	20.0126	20.2322	0.424145	19.94	0.0763816	-0.292225	0.391896
G3PT_MOUSE	Glyceraldehyde-3-phosphate dehydrogenase, testis-specific	G3PT_MOUSE_Cys351	R.VPTPNVSVVDLTCR.L	22.6355	22.6706	22.538	22.4413	22.4078	22.4773	22.6147	0.0561028	22.4421	0.0283718	-0.17254	0.0178226
G6PD1_MOUSE	Glucose-6-phosphate 1-dehydrogenase X	G6PD1_MOUSE_Cys13	R.TQVCGILR.E	21.0594	21.0633	21.0614	20.6924	20.7251	20.5309	21.0614	0.0016143	20.6495	0.0849158	-0.411899	0.00236605
G6PD1_MOUSE	Glucose-6-phosphate 1-dehydrogenase X	G6PD1_MOUSE_Cys158	K.NIQETCMSQTGWNR.I	17.956	18.0329	18.2341	17.8907	17.7797	17.6008	18.0743	0.117267	17.7571	0.119446	-0.31723	0.0552182
G6PD1_MOUSE	Glucose-6-phosphate 1-dehydrogenase X	G6PD1_MOUSE_Cys232	R.DNIACVILTFKEPFGTEGR.G	18.9563	19.2278	19.1149	18.7936	18.8142	18.8965	19.0997	0.111376	18.8348	0.0444395	-0.264888	0.0353907
G6PD1_MOUSE	Glucose-6-phosphate 1-dehydrogenase X	G6PD1_MOUSE_Cys385	R.DVAGDIFHQQCK.R	20.4325	20.4038	20.6465	20.5684	20.1342	20.4337	20.4943	0.108278	20.3788	0.181446	-0.115497	0.482654
G6PI_MOUSE	Glucose-6-phosphate isomerase	G6PI_MOUSE_Cys404	K.MIPCDFLIPVQTQHPIRK.G	17.1245	17.0968	17.0041	17.1717	16.9337	16.4385	17.0751	0.0514728	16.848	0.305405	-0.227134	0.358248
GALK1_MOUSE	Galactokinase	GALK1_MOUSE_Cys243	R.QCEEVAQALGK.E	19.7413	19.7911	19.6334	19.492	19.458	19.4858	19.7219	0.065844	19.4786	0.0147909	-0.243329	0.00698648
GALT7_MOUSE	N-acetylgalactosaminyltransferase 7	GALT7_MOUSE_Cys585	R.INEANQLMQYDQCLTK.G	18.4317	18.6777	18.443	18.5411	18.5587	18.144	18.5175	0.113425	18.4146	0.191483	-0.102886	0.548932
GANAB_MOUSE	Neutral alpha-glucosidase AB	GANAB_MOUSE_Cys41	K.TCDESSFCK.R	18.9334	18.7825	18.5042	18.5239	18.5542	18.4135	18.74	0.177758	18.4972	0.0604647	-0.242844	0.141375
GANAB_MOUSE	Neutral alpha-glucosidase AB	GANAB_MOUSE_Cys47	K.TCDESSFCK.R	18.9334	18.7825	18.5042	18.5239	18.5542	18.4135	18.74	0.177758	18.4972	0.0604647	-0.242844	0.141375
GATM_MOUSE	Glycine amidinotransferase, mitochondrial	GATM_MOUSE_Cys252	K.FVTTEFEPCFDAADFIR.A	16.9864	16.9792	16.9123	16.7539	16.6496	16.6156	16.9593	0.0333705	16.673	0.0588101	-0.286263	0.00391328
GBB1_MOUSE	Guanine nucleotide-binding protein G(I)/G(S)/G(T) subunit beta-1	GBB1_MOUSE_Cys317	R.VSCLGVTDDGMAVATGSWDSFLK.I	17.8778	17.6924	18.2124	18.0351	17.8924	17.9022	17.9275	0.215167	17.9432	0.0650707	0.0156892	0.926121
GBB2_MOUSE	Guanine nucleotide-binding protein G(I)/G(S)/G(T) subunit beta-2	GBB2_MOUSE_Cys204	R.TFVSGACDASIK.L	19.2601	19.2232	19.2613	18.8955	18.7344	18.7684	19.2482	0.0176456	18.7994	0.0693296	-0.448772	0.000891787
GBB2_MOUSE	Guanine nucleotide-binding protein G(I)/G(S)/G(T) subunit beta-2	GBB2_MOUSE_Cys25	K.ACGDSTLTQITAGLDPVGR.I	18.4742	18.4217	18.5262	18.4167	18.3976	18.3877	18.474	0.0426691	18.4007	0.0120156	-0.07335	0.0793714
GBLP_MOUSE	Guanine nucleotide-binding protein subunit beta-2-like 1	GBLP_MOUSE_Cys138	K.LWNTLGVCK.Y	23.0142	23.1608	22.9	22.896	23.0701	22.9694	23.025	0.106753	22.9785	0.0713726	-0.0465202	0.635417
GBLP_MOUSE	Guanine nucleotide-binding protein subunit beta-2-like 1	GBLP_MOUSE_Cys168	R.FSPNSSNPIIVSCGWDK.L	18.8973	18.7423	18.8271	18.5998	18.8022	18.4188	18.8222	0.0633369	18.6069	0.156625	-0.215303	0.145855
GBLP_MOUSE	Guanine nucleotide-binding protein subunit beta-2-like 1	GBLP_MOUSE_Cys207	K.TNHIGHTGYLNTVTVSPDGSLCASGGK.D	13.2895	12.9375	12.2715	12.5327	13.2119	12.6296	12.8328	0.422168	12.7914	0.299949	-0.0414403	0.915352
GBLP_MOUSE	Guanine nucleotide-binding protein subunit beta-2-like 1	GBLP_MOUSE_Cys249	R.YWLCAATGPSIK.I	22.2869	22.3705	22.1942	22.4032	22.3658	22.2612	22.2839	0.0720283	22.3434	0.0601238	0.0595317	0.420273
GDIA_MOUSE	Rab GDP dissociation inhibitor alpha	GDIA_MOUSE_Cys317	K.NTNDANSCQIIIPQNQVNR.K	16.6755	16.5568	16.6874	15.9642	16.1975	16.0476	16.6399	0.0589335	16.0697	0.0965317	-0.570156	0.00204664
GDIB_MOUSE	Rab GDP dissociation inhibitor beta	GDIB_MOUSE_Cys282	K.QLICDPSYVKDR.V	20.5844	20.3948	21.0314	20.6362	20.608	20.384	20.6702	0.266859	20.5427	0.11282	-0.127465	0.567533
GDIB_MOUSE	Rab GDP dissociation inhibitor beta	GDIB_MOUSE_Cys302	R.VICILSHPIK.N	19.3824	19.2552	19.1461	19.0548	19.0307	18.8742	19.2612	0.0965313	18.9865	0.0800674	-0.274714	0.036301
GDIB_MOUSE	Rab GDP dissociation inhibitor beta	GDIB_MOUSE_Cys414	R.AYDATTHFETTCDDIKDIYKR.M	14.0176	15.0682	14.8116	14.2908	14.2576	14.9992	14.6325	0.447225	14.5159	0.34201	-0.116597	0.784181
GDIR1_MOUSE	Rho GDP-dissociation inhibitor 1	GDIR1_MOUSE_Cys79	R.LTLVCSTAPGPLELDLTGDLESFK.K	19.1937	19.3786	19.7265	19.0176	19.1445	19.0279	19.4329	0.220855	19.0633	0.057547	-0.36959	0.0838434
GDIR2_MOUSE	Rho GDP-dissociation inhibitor 2	GDIR2_MOUSE_Cys75	R.LSLVCDSAPGPITMDLTGDLEALK.K	17.6908	17.615	17.486	17.2296	17.5877	17.345	17.5973	0.0845393	17.3874	0.14924	-0.209835	0.15866
GELS_MOUSE	Gelsolin	GELS_MOUSE_Cys670	R.LFACSNR.I	21.4291	21.4025	21.6483	21.1735	21.0968	20.9891	21.4933	0.110119	21.0865	0.0756413	-0.406841	0.0125784
GILT_MOUSE	Gamma-interferon-inducible lysosomal thiol reductase	GILT_MOUSE_Cys129	R.LNMVEACLLDK.L	14.8908	15.3496	15.4259	14.7002	15.0479	14.5577	15.2221	0.236317	14.7686	0.205898	-0.453482	0.110174
GILT_MOUSE	Gamma-interferon-inducible lysosomal thiol reductase	GILT_MOUSE_Cys159	K.KLGPCLQVYAPEVSPESIMECATGKR.G	16.6989	16.5425	16.4474	16.0546	17.2953	16.9189	16.5629	0.103673	16.7563	0.519402	0.193328	0.632935
GILT_MOUSE	Gamma-interferon-inducible lysosomal thiol reductase	GILT_MOUSE_Cys175	K.KLGPCLQVYAPEVSPESIMECATGKR.G	16.6989	16.5425	16.4474	16.0546	17.2953	16.9189	16.5629	0.103673	16.7563	0.519402	0.193328	0.632935
GILT_MOUSE	Gamma-interferon-inducible lysosomal thiol reductase	GILT_MOUSE_Cys69	R.VSLYYESLCGACR.Y	22.117	21.9737	21.6799	21.0991	21.4711	21.0006	21.9235	0.181967	21.1903	0.20264	-0.733263	0.0189799
GILT_MOUSE	Gamma-interferon-inducible lysosomal thiol reductase	GILT_MOUSE_Cys72	R.VSLYYESLCGACR.Y	22.117	21.9737	21.6799	21.0991	21.4711	21.0006	21.9235	0.181967	21.1903	0.20264	-0.733263	0.0189799
GLOD4_MOUSE	Glyoxalase domain-containing protein 4	GLOD4_MOUSE_Cys45	K.AACNGPYDGK.W	18.0524	17.7839	17.6576	17.623	17.6142	17.4547	17.8313	0.164615	17.564	0.0773646	-0.267335	0.106194
GLRX2_MOUSE	Glutaredoxin-2, mitochondrial	GLRX2_MOUSE_Cys146	K.LLPLVHQCYLK.K	15.7112	15.6907	15.5294	15.3668	15.1391	15.3676	15.6438	0.0812977	15.2912	0.107539	-0.352599	0.0208555
GLRX5_MOUSE	Glutaredoxin-related protein 5, mitochondrial	GLRX5_MOUSE_Cys63	K.GTPEQPQCGFSNAVVQILR.L	18.6888	18.4467	18.6611	18.4041	18.5335	18.2332	18.5989	0.108185	18.3903	0.122973	-0.208608	0.146032
GLSK_MOUSE	Glutaminase kidney isoform, mitochondrial	GLSK_MOUSE_Cys208	K.CVQSNIVLLTQAFR.R	18.4571	18.4073	18.5773	18.2657	18.2494	18.0659	18.4806	0.0713797	18.1937	0.0906172	-0.286898	0.0245098
GLSK_MOUSE	Glutaminase kidney isoform, mitochondrial	GLSK_MOUSE_Cys271	K.FSPDLWGVSVCTVDGQR.H	17.9439	17.9091	18.0043	18.0027	17.7813	17.7019	17.9525	0.0393216	17.8286	0.127296	-0.123842	0.258968
GLSL_MOUSE	Glutaminase liver isoform, mitochondrial	GLSL_MOUSE_Cys542	K.FLIEACK.V	20.3674	20.5761	20.6736	20.3723	20.3249	20.407	20.539	0.127721	20.3681	0.03366	-0.170973	0.141127
GLYC_MOUSE	Serine hydroxymethyltransferase, cytosolic	GLYC_MOUSE_Cys62	R.AVLEALGSCLNNK.Y	16.1522	16.0473	16.2023	16.2418	16.2782	15.9565	16.1339	0.0645912	16.1589	0.143827	0.0249304	0.83401
GMDS_MOUSE	GDP-mannose 4,6 dehydratase	GMDS_MOUSE_Cys8	K.CPSYPGSGDGEMGK.L	13.0642	13.2837	13.2716	13.1878	13.0432	13.1088	13.2065	0.100737	13.1133	0.0591154	-0.0932141	0.322164
GMPR2_MOUSE	GMP reductase 2	GMPR2_MOUSE_Cys186	K.VGIGPGSVCTTR.K	20.2031	20.2299	20.2714	20.0223	20.0167	19.9224	20.2348	0.0281271	19.9871	0.0458461	-0.24769	0.00286943
GNAI1_MOUSE	Guanine nucleotide-binding protein G(i) subunit alpha-1	GNAI1_MOUSE_Cys325	K.EIYTHFTCATDTK.N	19.3633	19.3525	19.2106	19.3208	19.184	19.1695	19.3088	0.0695446	19.2247	0.0681781	-0.0840546	0.289278
GNAI2_MOUSE	Guanine nucleotide-binding protein G(i) subunit alpha-2	GNAI2_MOUSE_Cys140	R.RLWADHGVQACFGR.S	14.5802	14.4559	14.8052	14.8792	14.3273	14.2636	14.6138	0.144563	14.49	0.2764	-0.123773	0.60463
GNPTA_MOUSE	N-acetylglucosamine-1-phosphotransferase subunits alpha/beta	GNPTA_MOUSE_Cys1073	K.SLVTNCKPVTDK.I	19.7961	19.6793	19.3778	19.2957	19.5424	19.1995	19.6177	0.176234	19.3458	0.144404	-0.271882	0.166764
GNS_MOUSE	N-acetylglucosamine-6-sulfatase	GNS_MOUSE_Cys505	R.LMMLQSCSGPTCR.T	19.3891	19.2819	19.198	19.171	19.2166	18.9187	19.2897	0.0782127	19.1021	0.131007	-0.187574	0.157098
GNS_MOUSE	N-acetylglucosamine-6-sulfatase	GNS_MOUSE_Cys510	R.LMMLQSCSGPTCR.T	19.3891	19.2819	19.198	19.171	19.2166	18.9187	19.2897	0.0782127	19.1021	0.131007	-0.187574	0.157098
GPNMB_MOUSE	Transmembrane glycoprotein NMB	GPNMB_MOUSE_Cys429	K.GATPMEACTIISDPTCQIAQNR.V	17.1242	17.2067	17.053	17.1023	16.872	16.7335	17.128	0.062778	16.9026	0.152144	-0.225396	0.124848
GPNMB_MOUSE	Transmembrane glycoprotein NMB	GPNMB_MOUSE_Cys437	K.GATPMEACTIISDPTCQIAQNR.V	17.1242	17.2067	17.053	17.1023	16.872	16.7335	17.128	0.062778	16.9026	0.152144	-0.225396	0.124848
GRN_MOUSE	Granulins	GRN_MOUSE_Cys207	R.AVSLPFSVVCPDAK.T	19.306	19.2193	19.3162	18.6015	18.6271	18.5764	19.2805	0.043468	18.6017	0.020701	-0.678853	3.73223e-05
GRP75_MOUSE	Stress-70 protein, mitochondrial	GRP75_MOUSE_Cys317	K.CELSSSVQTDINLPYLTMDASGPK.H	16.4524	16.6837	16.7171	16.3193	16.6462	16.394	16.6178	0.117691	16.4532	0.139826	-0.164589	0.271787
GRP75_MOUSE	Stress-70 protein, mitochondrial	GRP75_MOUSE_Cys487	K.SQVFSTAADGQTQVEIKVCQGER.E	16.3318	16.2763	16.1115	16.152	16.3669	16.0605	16.2398	0.0935469	16.1932	0.128408	-0.0466865	0.699037
GRP75_MOUSE	Stress-70 protein, mitochondrial	GRP75_MOUSE_Cys66	K.GAVVGIDLGTTNSCVAVMEGK.Q	19.1999	19.1369	18.9603	18.9955	19.0778	19.0467	19.099	0.101424	19.04	0.0338978	-0.0590152	0.47873
GSH1_MOUSE	Glutamate--cysteine ligase catalytic subunit	GSH1_MOUSE_Cys501	K.GGNAVVDGCSK.A	17.6834	17.6738	17.6247	17.3429	17.3852	17.3333	17.6606	0.0257148	17.3538	0.0225311	-0.306802	0.000222048
GSLG1_MOUSE	Golgi apparatus protein 1	GSLG1_MOUSE_Cys312	R.HLYFACR.D	16.4118	16.1339	16.1886	16.0712	15.9357	15.9076	16.2448	0.120208	15.9715	0.0714171	-0.273231	0.0506643
GSTO1_MOUSE	Glutathione S-transferase omega-1	GSTO1_MOUSE_Cys32	R.FCPFAQR.T	23.1182	22.7337	22.2221	22.325	22.5647	22.1221	22.6913	0.36705	22.3372	0.180893	-0.354069	0.288229
H32_MOUSE	Histone H3.2	H32_MOUSE_Cys111	R.FQSSAVM*ALQEASEAYLVGLFEDTNLCAIHAK.R	14.2564	13.6344	15.5851	16.5177	14.9123	14.3299	14.492	0.813623	15.2533	0.925134	0.761304	0.431505
HA13_MOUSE	H-2 class I histocompatibility antigen, D-K alpha chain	HA13_MOUSE_Cys145	R.GYEQFAYDGCDYIALNEDLK.T	17.3689	17.2643	17.4543	17.2483	17.3737	17.2947	17.3625	0.0776913	17.3056	0.0517538	-0.0569098	0.437225
HBS1L_MOUSE	HBS1-like protein	HBS1L_MOUSE_Cys133	R.AVCAGQPSK.G	17.9926	18.0141	18.04	17.9266	17.8554	17.8726	18.0156	0.0193816	17.8849	0.0303477	-0.130692	0.00682515
HD_MOUSE	Huntingtin	HD_MOUSE_Cys1844	R.HSLSCTK.S	12.2339	12.36	12.4643	12.439	12.5663	12.2454	12.3527	0.0941798	12.4169	0.131949	0.0641402	0.605643
HDGF_MOUSE	Hepatoma-derived growth factor	HDGF_MOUSE_Cys108	K.SCAAEPEVEPEAHEGDGDKK.G	12.3151	13.0311	13.4707	12.54	13.1486	12.1608	12.9389	0.476237	12.6165	0.406877	-0.322438	0.506949
HECD1_MOUSE	E3 ubiquitin-protein ligase HECTD1	HECD1_MOUSE_Cys1373	K.NNCPDKTSAAAGSSSR.K	11.4839	11.1646	11.5906	10.8152	10.8541	10.8456	11.413	0.180968	10.8383	0.0167073	-0.574744	0.011054
HEXB_MOUSE	Beta-hexosaminidase subunit beta	HEXB_MOUSE_Cys288	K.NLLTPCYNQK.T	19.3688	19.6693	19.491	19.4943	19.3469	19.4393	19.5097	0.123403	19.4268	0.0607916	-0.0828763	0.442219
HEXB_MOUSE	Beta-hexosaminidase subunit beta	HEXB_MOUSE_Cys530	R.GIAAQPLYTGYCNYENKI.-	18.3492	18.2381	18.2136	18.2165	18.3056	17.9991	18.267	0.0589849	18.1737	0.128756	-0.0932248	0.404595
HGS_MOUSE	Hepatocyte growth factor-regulated tyrosine kinase substrate	HGS_MOUSE_Cys185	R.ACGQIFCGK.C	20.0559	20.1288	20.0972	20.1011	19.9266	19.9873	20.0939	0.0298584	20.005	0.0723389	-0.08894	0.183281
HGS_MOUSE	Hepatocyte growth factor-regulated tyrosine kinase substrate	HGS_MOUSE_Cys190	R.ACGQIFCGK.C	20.0559	20.1288	20.0972	20.1011	19.9266	19.9873	20.0939	0.0298584	20.005	0.0723389	-0.08894	0.183281
HMGA2_MOUSE	High mobility group protein HMGI-C	HMGA2_MOUSE_Cys41	R.KQQQEPTCEPSPK.R	15.603	15.5123	15.3427	16.2869	16.0552	15.9258	15.486	0.107891	16.0893	0.149378	0.603297	0.00980574
HMGB1_MOUSE	High mobility group protein B1	HMGB1_MOUSE_Cys23	K.MSSYAFFVQTCREEHKK.K	19.3325	19.1739	19.7021	19.4896	18.9937	19.1444	19.4028	0.22132	19.2092	0.207572	-0.193617	0.417869
HMHA1_MOUSE	Minor histocompatibility protein HA-1	HMHA1_MOUSE_Cys468	R.TCVADAK.T	18.2784	18.4652	18.5961	18.1997	18.1366	18.2831	18.4465	0.130373	18.2065	0.0599695	-0.240078	0.0771611
HMOX2_MOUSE	Heme oxygenase 2	HMOX2_MOUSE_Cys126	K.CSEAAQK.Y	15.9833	15.9249	16.1121	15.5628	15.6867	15.673	16.0067	0.0781909	15.6408	0.0554584	-0.365906	0.00569949
HNRPL_MOUSE	Heterogeneous nuclear ribonucleoprotein L	HNRPL_MOUSE_Cys257	K.ASLNGADIYSGCCTLK.I	17.6852	18.013	17.7487	18.3254	18.3069	18.0955	17.8157	0.14192	18.2426	0.104314	0.426949	0.0265825
HNRPL_MOUSE	Heterogeneous nuclear ribonucleoprotein L	HNRPL_MOUSE_Cys258	K.ASLNGADIYSGC#CTLK.I	18.7712	18.9049	18.9137	19.2091	19.2825	19.1152	18.8633	0.0651837	19.2023	0.0684568	0.338994	0.00712194
HNRPL_MOUSE	Heterogeneous nuclear ribonucleoprotein L	HNRPL_MOUSE_Cys401	R.VFNVFCLYGNVEK.V	19.2035	19.3154	19.3803	19.5311	19.6391	19.4726	19.2997	0.0730065	19.5476	0.068957	0.247871	0.0251087
HNRPM_MOUSE	Heterogeneous nuclear ribonucleoprotein M	HNRPM_MOUSE_Cys26	K.MEEESGAPCVPSGNGAPGPK.G	14.9799	14.3959	14.6153	14.7013	14.3701	14.6493	14.6637	0.240871	14.5736	0.14544	-0.0901292	0.674035
HNRPQ_MOUSE	Heterogeneous nuclear ribonucleoprotein Q	HNRPQ_MOUSE_Cys289	R.GFCFLEYEDHK.T	19.2871	19.182	19.2985	19.2819	19.2733	19.3415	19.2559	0.0524471	19.2989	0.0303187	0.0430313	0.371953
HNRPQ_MOUSE	Heterogeneous nuclear ribonucleoprotein Q	HNRPQ_MOUSE_Cys96	K.SAFLCGVMK.T	22.9633	22.7631	23.111	23.205	23.0286	23.0963	22.9458	0.142545	23.11	0.0726374	0.164159	0.220373
HNRPU_MOUSE	Heterogeneous nuclear ribonucleoprotein U	HNRPU_MOUSE_Cys426	K.EVLADRPLFPHVLCHNC#AVEFNFGQK.E	14.9033	14.3645	14.957	15.2075	14.5362	14.7223	14.7416	0.267547	14.822	0.282939	0.0804036	0.784802
HNRPU_MOUSE	Heterogeneous nuclear ribonucleoprotein U	HNRPU_MOUSE_Cys538	R.APQCLGK.F	20.0331	20.1853	20.2314	20.4129	20.3327	20.2834	20.1499	0.0847152	20.343	0.0534012	0.193063	0.0526349
HNRPU_MOUSE	Heterogeneous nuclear ribonucleoprotein U	HNRPU_MOUSE_Cys583	R.KAVVVCPK.D	22.6168	22.5849	22.5973	22.8766	22.8615	22.8888	22.5997	0.0131111	22.8756	0.0111711	0.275981	2.24687e-05
HOIL1_MOUSE	RanBP-type and C3HC4-type zinc finger-containing protein 1	HOIL1_MOUSE_Cys491	R.WGPGGPGDTSGGCR.C	17.182	17.1545	16.9013	16.8165	16.8226	16.7504	17.0793	0.126347	16.7965	0.0326715	-0.282805	0.0374881
HPRT_MOUSE	Hypoxanthine-guanine phosphoribosyltransferase	HPRT_MOUSE_Cys106	K.SYCNDQSTGDIK.V	17.1914	16.9656	17.198	16.9447	16.8426	16.8505	17.1183	0.108034	16.8793	0.0464063	-0.239063	0.0452228
HS105_MOUSE	Heat shock protein 105 kDa	HS105_MOUSE_Cys140	K.KPVTDCVISVPSFFTDAER.R	17.1545	17.2987	17.6476	17.3087	17.4066	17.7812	17.367	0.20701	17.4989	0.203649	0.131901	0.555603
HS105_MOUSE	Heat shock protein 105 kDa	HS105_MOUSE_Cys167	R.SVLDAAQIVGLNCLR.L	20.2222	20.2362	20.334	20.1679	20.0536	20.0507	20.2641	0.0497346	20.0907	0.0545741	-0.173406	0.0293431
HS105_MOUSE	Heat shock protein 105 kDa	HS105_MOUSE_Cys245	K.LVEHFCAEFK.T	18.1346	18.5441	18.4604	18.4483	18.128	18.2348	18.3797	0.176615	18.2704	0.133169	-0.10932	0.523095
HS105_MOUSE	Heat shock protein 105 kDa	HS105_MOUSE_Cys290	K.LMSSNSTDLPLNIECFMNDKDVSGK.M	16.0102	15.7912	16.2042	15.9379	15.9198	16.0642	16.0019	0.168727	15.974	0.064215	-0.0278535	0.837959
HS105_MOUSE	Heat shock protein 105 kDa	HS105_MOUSE_Cys310	R.SQFEELCAELLQK.I	16.4854	16.6307	16.5497	16.7701	16.4123	16.3852	16.5552	0.0594728	16.5225	0.175413	-0.0327105	0.815079
HS105_MOUSE	Heat shock protein 105 kDa	HS105_MOUSE_Cys376	R.GCALQCAILSPAFK.V	18.4575	18.2732	18.3093	18.4073	18.4413	18.1927	18.3466	0.0797293	18.3471	0.110063	0.000467787	0.996349
HS105_MOUSE	Heat shock protein 105 kDa	HS105_MOUSE_Cys380	R.GC#ALQCAILSPAFK.V	19.8375	19.7043	19.8299	19.7241	19.7073	19.6245	19.7906	0.061076	19.6853	0.0435518	-0.105288	0.118129
HS105_MOUSE	Heat shock protein 105 kDa	HS105_MOUSE_Cys651	K.LCGPYEK.F	21.5309	21.6549	21.6234	21.3879	21.3691	21.4126	21.6031	0.0526535	21.3899	0.0177895	-0.213229	0.00559549
HS105_MOUSE	Heat shock protein 105 kDa	HS105_MOUSE_Cys659	K.FICEQEHEK.F	19.1989	19.1619	19.1075	19.2723	18.9618	19.1269	19.1561	0.0375457	19.1204	0.126826	-0.0357261	0.721898
HS90A_MOUSE	Heat shock protein HSP 90-alpha	HS90A_MOUSE_Cys375	R.VFIMDNCEELIPEYLNFIR.G	16.7425	16.8996	16.739	16.6546	16.7062	16.5498	16.7937	0.0748563	16.6369	0.0650482	-0.156842	0.0889527
HS90A_MOUSE	Heat shock protein HSP 90-alpha	HS90A_MOUSE_Cys482	R.YYTSASGDEMVSLKDYCTR.M	18.7399	18.7862	18.992	18.5675	19.0018	18.6574	18.8394	0.109578	18.7422	0.187182	-0.0971703	0.56078
HS90A_MOUSE	Heat shock protein HSP 90-alpha	HS90A_MOUSE_Cys530	K.HGLEVIYMIEPIDEYCVQQLK.E	17.9845	18.2463	17.9905	18.1307	18.0122	18.1475	18.0737	0.122018	18.0968	0.0602029	0.0230824	0.822189
HS90A_MOUSE	Heat shock protein HSP 90-alpha	HS90A_MOUSE_Cys573	K.TKFENLCK.I	22.0827	22.0194	22.0555	21.9401	21.9614	21.825	22.0525	0.0259226	21.9088	0.0599199	-0.143724	0.0357583
HS90A_MOUSE	Heat shock protein HSP 90-alpha	HS90A_MOUSE_Cys598	R.LVTSPCCIVTSTYGWTANMER.I	18.1933	17.8345	18.2844	18.2011	18.3973	18.1061	18.1041	0.194195	18.2348	0.12127	0.130778	0.4645
HS90A_MOUSE	Heat shock protein HSP 90-alpha	HS90A_MOUSE_Cys599	R.LVTSPC#CIVTSTYGWTANMER.I	17.6268	18.229	18.2037	17.7479	17.8848	17.6086	18.0198	0.278077	17.7471	0.112758	-0.272755	0.268
HS90B_MOUSE	Heat shock protein HSP 90-beta	HS90B_MOUSE_Cys366	R.VFIMDSCDELIPEYLNFIR.G	18.9781	18.6938	19.0433	18.8525	18.4741	18.9365	18.9051	0.151731	18.7544	0.201134	-0.15071	0.445217
HS90B_MOUSE	Heat shock protein HSP 90-beta	HS90B_MOUSE_Cys412	K.CLELFSELAEDKENYKK.F	20.1902	20.3903	20.1842	19.8465	20.001	19.5689	20.2549	0.0957852	19.8055	0.178775	-0.449446	0.0350535
HS90B_MOUSE	Heat shock protein HSP 90-beta	HS90B_MOUSE_Cys521	R.GFEVVYM*TEPIDEYCVQQLK.E	18.4539	18.5917	18.5623	18.4314	18.8259	18.5186	18.536	0.059247	18.592	0.169179	0.0560011	0.681455
HS90B_MOUSE	Heat shock protein HSP 90-beta	HS90B_MOUSE_Cys564	K.AKFENLCK.L	19.4779	19.5487	19.4712	19.3675	19.4233	19.2915	19.4993	0.0350712	19.3607	0.05402	-0.138558	0.0383111
HS90B_MOUSE	Heat shock protein HSP 90-beta	HS90B_MOUSE_Cys589	R.LVSSPCCIVTSTYGWTANMER.I	20.1776	19.561	20.3097	20.1098	20.1973	19.7536	20.0161	0.326304	20.0202	0.191879	0.00416544	0.988329
HS90B_MOUSE	Heat shock protein HSP 90-beta	HS90B_MOUSE_Cys590	R.LVSSPCCIVTSTYGWTANMER.I	19.8239	19.6581	19.8648	19.6125	19.4726	19.5821	19.7823	0.0893624	19.5557	0.060094	-0.226541	0.04094
HSP74_MOUSE	Heat shock 70 kDa protein 4	HSP74_MOUSE_Cys140	K.KPVVDCVVSVPSFYTDAER.R	19.1142	18.843	18.8583	18.8967	18.732	18.7049	18.9385	0.124385	18.7779	0.0847176	-0.160602	0.205753
HSP74_MOUSE	Heat shock 70 kDa protein 4	HSP74_MOUSE_Cys245	R.KFDEVLVNHFCEEFGK.K	16.6456	16.4467	16.4827	16.4408	16.4149	16.5089	16.525	0.0865256	16.4549	0.039604	-0.0701024	0.356313
HSP74_MOUSE	Heat shock 70 kDa protein 4	HSP74_MOUSE_Cys310	R.GKFLEMCDDLLAR.V	18.5271	18.5917	18.8281	18.7363	18.6712	18.609	18.649	0.129365	18.6721	0.0519734	0.0231497	0.825873
HSP74_MOUSE	Heat shock 70 kDa protein 4	HSP74_MOUSE_Cys780	K.ELTSICSPIISK.P	21.0344	21.1235	21.1359	20.9943	21.0567	21.1576	21.0979	0.0452067	21.0695	0.0673134	-0.0284166	0.646157
HSP7C_MOUSE	Heat shock cognate 71 kDa protein	HSP7C_MOUSE_Cys17	K.GPAVGIDLGTTYSCVGVFQHGK.V	19.8727	20.0934	20.0883	20.1046	19.9994	20.0468	20.0181	0.102849	20.0503	0.0430329	0.0321814	0.704023
HSP7C_MOUSE	Heat shock cognate 71 kDa protein	HSP7C_MOUSE_Cys574	K.ILDKCNEIISWLDK.N	19.6669	19.9803	20.1473	20.095	19.9791	20.0698	19.9315	0.199112	20.048	0.0497818	0.116488	0.467151
HSP7C_MOUSE	Heat shock cognate 71 kDa protein	HSP7C_MOUSE_Cys603	K.ELEKVCNPIITK.L	23.5014	23.644	23.8269	23.7134	23.6512	23.6729	23.6574	0.133226	23.6791	0.0257587	0.0217058	0.83212
HUWE1_MOUSE	E3 ubiquitin-protein ligase HUWE1	HUWE1_MOUSE_Cys2721	R.DQSAQCTVTK.T	15.9527	15.9382	16.0049	15.9085	15.8522	15.9026	15.9652	0.0286423	15.8878	0.0252355	-0.0774641	0.0454771
HXK2_MOUSE	Hexokinase-2	HXK2_MOUSE_Cys794	K.FLSQIESDCLALLQVR.A	15.0139	15.2111	15.1454	15.2857	15.1307	15.0544	15.1235	0.0819735	15.1569	0.0962601	0.0334381	0.727373
HXK3_MOUSE	Hexokinase-3	HXK3_MOUSE_Cys586	K.LFDHIVDCIVDFQK.R	17.3993	17.5307	17.507	17.0876	17.2063	17.2268	17.479	0.0571935	17.1736	0.0613662	-0.305399	0.00675086
I2BP2_MOUSE	Interferon regulatory factor 2-binding protein 2	I2BP2_MOUSE_Cys65	R.AHGCFPEGR.S	16.7796	17.0495	17.1583	16.6739	16.6708	16.5693	16.9958	0.159222	16.638	0.0485906	-0.357824	0.0384095
I5P2_MOUSE	Type II inositol 1,4,5-trisphosphate 5-phosphatase	I5P2_MOUSE_Cys280	R.CPEKPENSLTR.Q	17.1144	17.09	16.9824	16.7052	16.7574	16.851	17.0622	0.0573375	16.7712	0.0603174	-0.291038	0.00778485
ICA_MOUSE	Inhibitor of carbonic anhydrase	ICA_MOUSE_Cys185	S.LCQLCAGK.G	16.2094	16.2214	16.1293	16.4961	16.3019	16.1101	16.1867	0.0408884	16.3027	0.157616	0.115998	0.370714
ICA_MOUSE	Inhibitor of carbonic anhydrase	ICA_MOUSE_Cys188	S.LCQLCAGK.G	16.2094	16.2214	16.1293	16.4961	16.3019	16.1101	16.1867	0.0408884	16.3027	0.157616	0.115998	0.370714
ICAL_MOUSE	Calpastatin	ICAL_MOUSE_Cys491	R.ASMCSIR.S	20.6742	20.4707	20.292	20.3498	20.3276	20.1894	20.479	0.156116	20.2889	0.0709466	-0.19004	0.192117
ICAM1_MOUSE	Intercellular adhesion molecule 1	ICAM1_MOUSE_Cys422	K.CQAWGNPSPK.M	18.3034	18.2124	17.9156	17.7809	17.8896	17.6805	18.1438	0.165583	17.7836	0.0854048	-0.360135	0.0522465
IDH3A_MOUSE	Isocitrate dehydrogenase [NAD] subunit alpha, mitochondrial	IDH3A_MOUSE_Cys127	K.TFDLYANVRPCVSIEGYK.T	18.1694	18.3634	18.4733	18.1485	18.2313	18.1716	18.3354	0.125652	18.1838	0.0348677	-0.151555	0.175596
IDHC_MOUSE	Isocitrate dehydrogenase [NADP] cytoplasmic	IDHC_MOUSE_Cys73	K.CATITPDEK.R	17.7797	17.7562	17.6293	17.2399	17.2879	17.2202	17.7217	0.0660668	17.2494	0.0284197	-0.472353	0.000747461
IDHG1_MOUSE	Isocitrate dehydrogenase [NAD] subunit gamma 1, mitochondrial	IDHG1_MOUSE_Cys148	R.TSLDLYANVIHCK.S	18.2827	18.4178	18.2401	18.2471	18.2137	18.0986	18.3135	0.0757625	18.1865	0.0636412	-0.127058	0.143537
IDHG1_MOUSE	Isocitrate dehydrogenase [NAD] subunit gamma 1, mitochondrial	IDHG1_MOUSE_Cys333	K.NIANPTATLLASCMMLDHLK.L	18.9388	18.6882	19.0379	18.7761	18.7692	18.8016	18.8883	0.147172	18.7823	0.0139735	-0.105993	0.367953
IDHP_MOUSE	Isocitrate dehydrogenase [NADP], mitochondrial	IDHP_MOUSE_Cys235	H.SCFQYSIQK.K	20.8827	20.9596	20.7968	20.5111	20.6908	20.5306	20.8797	0.0665089	20.5775	0.0805351	-0.302192	0.0149549
IDHP_MOUSE	Isocitrate dehydrogenase [NADP], mitochondrial	IDHP_MOUSE_Cys402	K.VCVQTVESGAMTK.D	18.7651	18.6568	18.7068	18.6079	18.5753	18.4273	18.7096	0.0442526	18.5368	0.0785609	-0.17273	0.0535838
IDHP_MOUSE	Isocitrate dehydrogenase [NADP], mitochondrial	IDHP_MOUSE_Cys418	K.DLAGCIHGLSNVK.L	19.6859	19.7157	19.7568	19.6627	19.698	19.6622	19.7195	0.0290531	19.6743	0.0167588	-0.0451419	0.129729
IDI1_MOUSE	Isopentenyl-diphosphate Delta-isomerase 1	IDI1_MOUSE_Cys172	K.SYCYVSK.E	19.5047	19.4765	19.5	19.2661	19.2616	19.1677	19.4937	0.012344	19.2318	0.0453714	-0.261942	0.00140332
IF2A_MOUSE	Eukaryotic translation initiation factor 2 subunit 1	IF2A_MOUSE_Cys218	R.AGLNCSTETMPIK.I	19.1494	18.9842	19.1114	18.8459	18.8815	18.7273	19.0816	0.0706498	18.8182	0.0659304	-0.263411	0.0182256
IF2B_MOUSE	Eukaryotic translation initiation factor 2 subunit 2	IF2B_MOUSE_Cys224	K.TSFVNFTDICK.L	20.8121	20.9073	20.9967	20.7271	20.7698	20.8281	20.9054	0.0753816	20.775	0.0414267	-0.130377	0.0986889
IF2G_MOUSE	Eukaryotic translation initiation factor 2 subunit 3, X-linked	IF2G_MOUSE_Cys434	K.IVLTNPVCTEVGEK.I	18.4076	18.4556	18.6406	18.4533	18.4702	18.3841	18.5012	0.100462	18.4359	0.0372474	-0.0653565	0.436982
IF2P_MOUSE	Eukaryotic translation initiation factor 5B	IF2P_MOUSE_Cys1088	K.HIAVFPCK.M	15.7173	16.0476	16.1594	15.6727	15.8577	15.8017	15.9748	0.187684	15.7774	0.0774607	-0.197389	0.241164
IF2P_MOUSE	Eukaryotic translation initiation factor 5B	IF2P_MOUSE_Cys1122	K.QGTPMCVPSK.N	20.0241	19.9503	20.44	20.062	19.9132	20.0325	20.1381	0.215543	20.0026	0.0643293	-0.135563	0.442071
IF4A1_MOUSE	Eukaryotic initiation factor 4A-I	IF4A1_MOUSE_Cys134	H.ACIGGTNVR.A	20.6832	20.619	20.6223	20.5899	20.623	20.5354	20.6415	0.0295207	20.5828	0.0361379	-0.0587361	0.149663
IF4B_MOUSE	Eukaryotic translation initiation factor 4B	IF4B_MOUSE_Cys543	K.VDVVGATQGQAGSCSR.G	17.8434	17.3102	17.419	17.5105	17.4908	17.2772	17.5242	0.230052	17.4262	0.105636	-0.0980416	0.613017
IF4G1_MOUSE	Eukaryotic translation initiation factor 4 gamma 1	IF4G1_MOUSE_Cys923	K.MLTEAIMHDCVVK.L	18.583	18.6125	18.9524	18.7178	18.4756	18.5923	18.716	0.167611	18.5952	0.0988944	-0.120738	0.429814
IF4G2_MOUSE	Eukaryotic translation initiation factor 4 gamma 2	IF4G2_MOUSE_Cys282	R.MCSLMLSK.E	20.2999	20.3014	20.5723	20.1432	20.387	20.139	20.3912	0.128031	20.2231	0.115927	-0.168113	0.240689
IF4G2_MOUSE	Eukaryotic translation initiation factor 4 gamma 2	IF4G2_MOUSE_Cys628	K.QEGIATSDNFMQAFLNVLEQCPK.L	14.6569	14.2425	14.1086	14.3012	13.9287	14.5498	14.336	0.233401	14.2599	0.255233	-0.0761112	0.771181
IF5_MOUSE	Eukaryotic translation initiation factor 5	IF5_MOUSE_Cys122	K.QTIGNSCK.A	19.2467	19.4936	19.2215	19.3888	19.4333	19.275	19.3206	0.122788	19.3657	0.0666707	0.0451077	0.671674
IF5A1_MOUSE	Eukaryotic translation initiation factor 5A-1	IF5A1_MOUSE_Cys73	K.YEDICPSTHNMDVPNIK.R	18.5411	18.4111	18.5818	18.4469	18.3539	18.2192	18.5113	0.0728052	18.34	0.0934831	-0.171336	0.11032
IGSF8_MOUSE	Immunoglobulin superfamily member 8	IGSF8_MOUSE_Cys184	R.LTVHEGQELALGCLAQTK.T	19.7536	19.6411	19.6634	19.6704	19.5741	19.4445	19.6861	0.0486399	19.563	0.0925691	-0.12307	0.171363
IKKB_MOUSE	Inhibitor of nuclear factor kappa-B kinase subunit beta	IKKB_MOUSE_Cys464	R.NNSCLSK.M	18.7344	18.7365	18.9555	18.7214	18.7205	18.7382	18.8088	0.103753	18.7267	0.00816031	-0.0821255	0.326948
IMA3_MOUSE	Importin subunit alpha-3	IMA3_MOUSE_Cys122	K.SGILPILVHCLER.D	15.1308	15.128	15.4508	14.987	14.9478	14.9865	15.2365	0.15151	14.9738	0.0183719	-0.262777	0.0715974
IMA5_MOUSE	Importin subunit alpha-5	IMA5_MOUSE_Cys240	R.NAVWALSNLCR.G	19.9715	19.8437	19.8976	19.7521	19.6865	19.5686	19.9043	0.0523632	19.6691	0.0758858	-0.235198	0.0226038
IMB1_MOUSE	Importin subunit beta-1	IMB1_MOUSE_Cys223	R.HFIMQVVCEATQC#PDTR.V	18.8451	18.7717	18.8301	18.7176	18.6401	18.5015	18.8156	0.0316486	18.6197	0.0893918	-0.195931	0.0431581
IMB1_MOUSE	Importin subunit beta-1	IMB1_MOUSE_Cys543	K.DCYPAVQK.T	19.8814	19.7412	20.0204	19.6304	19.8169	19.6747	19.881	0.113997	19.7073	0.079547	-0.173674	0.151988
IMB1_MOUSE	Importin subunit beta-1	IMB1_MOUSE_Cys667	K.NYAEYQVCLAAVGLVGDLCR.A	17.2537	16.9917	17.3233	17.0339	17.1159	17.0014	17.1896	0.14277	17.0504	0.048196	-0.139192	0.261487
IMB1_MOUSE	Importin subunit beta-1	IMB1_MOUSE_Cys678	K.NYAEYQVCLAAVGLVGDLCR.A	17.1246	16.8181	17.2655	16.8869	17.2554	16.8962	17.0694	0.186759	17.0128	0.17158	-0.0565771	0.768163
IMB1_MOUSE	Importin subunit beta-1	IMB1_MOUSE_Cys689	R.ALQSNILPFCDEVMQLLLENLGNENVHR.S	14.7761	16.5466	14.75	15.1545	14.6312	14.9242	15.3575	0.840862	14.9033	0.214133	-0.454247	0.500188
IMB1_MOUSE	Importin subunit beta-1	IMB1_MOUSE_Cys765	R.ESCLEAYTGIVQGLK.G	18.7551	18.7236	18.68	18.6125	18.5979	18.5611	18.7196	0.0307714	18.5905	0.0216003	-0.129075	0.00830759
IMDH2_MOUSE	Inosine-5'-monophosphate dehydrogenase 2	IMDH2_MOUSE_Cys468	K.FVPYLIAGIQHSCQDIGAK.S	18.8916	19.1303	18.9364	19.0793	18.878	19.1006	18.9861	0.103582	19.0193	0.100286	0.0331904	0.761072
IMPA1_MOUSE	Inositol monophosphatase 1	IMPA1_MOUSE_Cys141	K.GAFCNGQK.L	20.3041	20.3289	20.4892	20.0419	20.1549	19.9664	20.374	0.0820244	20.0544	0.0774443	-0.319652	0.0160325
INF2_MOUSE	Inverted formin-2	INF2_MOUSE_Cys172	K.MVCSQQYR.F	19.5679	19.4794	19.5405	19.2724	19.2823	19.2763	19.5293	0.0370178	19.277	0.00406542	-0.252248	0.000663634
INF2_MOUSE	Inverted formin-2	INF2_MOUSE_Cys778	K.AQLVLTACESLLTSQR.L	16.0553	15.8702	16.1624	15.9986	16.1451	15.8862	16.0293	0.120711	16.01	0.105998	-0.0193238	0.873177
INO1_MOUSE	Inositol-3-phosphate synthase 1	INO1_MOUSE_Cys539	K.EPTPATNGCTGDANGHPQAPTPK.L	12.4466	12.5984	12.954	12.4673	12.4372	12.6043	12.6663	0.212661	12.5029	0.0727239	-0.163381	0.362028
IPO11_MOUSE	Importin-11	IPO11_MOUSE_Cys262	R.SIGTDNVCR.D	18.1416	18.196	18.2696	17.9142	18.0376	18.0069	18.2024	0.0524844	17.9862	0.0524433	-0.216167	0.0146088
IPO5_MOUSE	Importin-5	IPO5_MOUSE_Cys110	K.ICDIAAELAR.N	21.0597	21.0659	20.9835	20.7257	20.9975	20.6773	21.0364	0.0374645	20.8002	0.140947	-0.236219	0.0838017
IPO5_MOUSE	Importin-5	IPO5_MOUSE_Cys266	K.LCGDTNLNNMQR.Q	18.5041	18.6233	18.4536	18.1576	18.2175	18.1258	18.527	0.0711268	18.167	0.0379748	-0.360018	0.00321689
IPO5_MOUSE	Importin-5	IPO5_MOUSE_Cys420	R.YAACNAVGQMATDFAPGFQK.K	19.1124	19.0025	19.3105	19.1277	19.3797	18.9897	19.1418	0.127461	19.1657	0.161439	0.0239107	0.877392
IPO5_MOUSE	Importin-5	IPO5_MOUSE_Cys560	K.TIECISLIGLAVGK.E	19.0935	19.3176	19.2298	19.1326	19.0721	19.0978	19.2136	0.0921869	19.1008	0.0248041	-0.112775	0.170116
IPO5_MOUSE	Importin-5	IPO5_MOUSE_Cys733	R.VAAAESMPLLLECAR.V	19.8439	19.9238	19.8663	19.6898	19.8592	19.5887	19.878	0.0336348	19.7126	0.111594	-0.165414	0.115182
IPO5_MOUSE	Importin-5	IPO5_MOUSE_Cys750	R.GPEYLTQMWHFMCDALIK.A	17.7115	18.1175	17.8189	17.8473	17.8764	17.715	17.8826	0.171796	17.8129	0.0702475	-0.069734	0.623318
IPO7_MOUSE	Importin-7	IPO7_MOUSE_Cys401	R.MKFDVFEDFISPTTAAQTLLFTACSK.R	15.4695	15.2456	15.6645	15.5648	15.579	15.346	15.4599	0.171163	15.4966	0.106606	0.0367155	0.809499
IPO7_MOUSE	Importin-7	IPO7_MOUSE_Cys736	K.VLTGVAGEDAECHAAK.L	16.9652	17.2241	17.151	17.006	16.8471	16.7677	17.1134	0.108992	16.8736	0.0990633	-0.239781	0.0827246
IPO7_MOUSE	Importin-7	IPO7_MOUSE_Cys749	K.LLEVIILQCK.G	16.9648	17.1849	16.7221	16.3996	16.5787	16.3952	16.9572	0.189002	16.4578	0.0855025	-0.499398	0.0271623
IPO7_MOUSE	Importin-7	IPO7_MOUSE_Cys757	R.GIDQCIPLFVEAALER.L	18.9239	19.1295	19.2484	19.2218	19.1571	19.0395	19.1006	0.134055	19.1394	0.0754475	0.038868	0.738899
IQGA1_MOUSE	Ras GTPase-activating-like protein IQGAP1	IQGA1_MOUSE_Cys45	R.QNVAYEYLCHLEEAKR.W	17.8086	17.226	17.7427	17.1779	17.357	17.1056	17.5924	0.260475	17.2135	0.105666	-0.378903	0.129294
IRF5_MOUSE	Interferon regulatory factor 5	IRF5_MOUSE_Cys271	R.TLTISNPQGCR.L	18.3038	18.3602	18.4188	18.0128	18.1515	18.1039	18.3609	0.0469252	18.0894	0.0575614	-0.271534	0.00664852
ITA4_MOUSE	Integrin alpha-4	ITA4_MOUSE_Cys172	K.SDNKLPTGICYVMPSDLR.T	19.7077	19.4822	19.3275	19.1654	19.3159	19.133	19.5058	0.156111	19.2047	0.0796828	-0.301084	0.0720308
ITA4_MOUSE	Integrin alpha-4	ITA4_MOUSE_Cys904	K.ADQHCLDFLCNFGK.M	18.8784	18.7364	18.6732	18.5062	18.5331	18.539	18.7627	0.0857793	18.5261	0.0142855	-0.236549	0.0183507
ITA4_MOUSE	Integrin alpha-4	ITA4_MOUSE_Cys909	K.ADQHCLDFLCNFGK.M	18.8784	18.7364	18.6732	18.5062	18.5331	18.539	18.7627	0.0857793	18.5261	0.0142855	-0.236549	0.0183507
ITA5_MOUSE	Integrin alpha-5	ITA5_MOUSE_Cys925	R.CEFGPLHR.Q	17.591	17.4095	17.3215	16.9356	17.1111	16.8098	17.4407	0.11221	16.9522	0.123582	-0.488473	0.0143947
ITAM_MOUSE	Integrin alpha-M	ITAM_MOUSE_Cys494	R.GGQVSVCPLPR.G	20.891	20.896	20.6653	20.3852	20.4038	20.3226	20.8174	0.107618	20.3705	0.0347413	-0.446904	0.0050284
ITAM_MOUSE	Integrin alpha-M	ITAM_MOUSE_Cys505	R.WQCEALLHGDQGHPWGR.F	13.1282	12.7419	11.9091	12.5559	12.7362	12.9992	12.5931	0.508686	12.7637	0.182025	0.170644	0.678225
ITAM_MOUSE	Integrin alpha-M	ITAM_MOUSE_Cys638	R.SVFACQEQVLK.N	20.6625	20.6177	20.6408	20.3633	20.4537	20.2113	20.6404	0.0182981	20.3428	0.100045	-0.297589	0.0143996
ITAM_MOUSE	Integrin alpha-M	ITAM_MOUSE_Cys721	K.LILPDCVDDSVSPIILR.L	18.741	18.4924	18.526	18.3572	18.5717	18.2729	18.5865	0.110113	18.4006	0.125793	-0.18585	0.191017
ITAV_MOUSE	Integrin alpha-V	ITAV_MOUSE_Cys138	K.ILACAPLYHWR.T	16.4144	16.7255	16.5088	16.4736	16.292	16.3433	16.5496	0.130212	16.3696	0.0764269	-0.179931	0.167202
ITB1_MOUSE	Integrin beta-1	ITB1_MOUSE_Cys691	K.LPQPVQVDPVTHCK.E	20.1682	20.2024	19.945	19.6828	19.6804	19.8145	20.1052	0.114143	19.7259	0.0626966	-0.379292	0.0146255
ITB2_MOUSE	Integrin beta-2	ITB2_MOUSE_Cys192	K.LRNPCPNK.E	20.9082	20.8659	20.8019	20.6541	20.6797	20.4916	20.8586	0.0437007	20.6085	0.0832792	-0.250145	0.0197503
ITB2_MOUSE	Integrin beta-2	ITB2_MOUSE_Cys287	R.CHLEDNMYK.R	19.5072	19.4693	19.2393	19.1151	19.1387	19.0924	19.4053	0.118361	19.1154	0.018887	-0.289865	0.026777
ITB2_MOUSE	Integrin beta-2	ITB2_MOUSE_Cys387	K.VTYDSFCSNGASSIGK.S	18.2037	18.1286	18.2497	17.9075	18.1193	17.8234	18.194	0.0499474	17.9501	0.124472	-0.243933	0.0618385
ITB2_MOUSE	Integrin beta-2	ITB2_MOUSE_Cys550	R.YNSQVCGGSDR.G	14.7773	14.8209	14.5472	13.8795	13.9984	13.8514	14.7151	0.120076	13.9098	0.0637273	-0.805367	0.00111003
ITB2_MOUSE	Integrin beta-2	ITB2_MOUSE_Cys583	R.STTGCLNAR.L	16.9994	16.9508	16.8582	16.5925	16.8408	16.5491	16.9361	0.058563	16.6608	0.128518	-0.275301	0.0510226
ITB2_MOUSE	Integrin beta-2	ITB2_MOUSE_Cys672	R.DSEGCWITYTLQQK.D	18.1674	17.9482	18.2963	18.3201	18.029	17.9898	18.1373	0.143705	18.113	0.147357	-0.0243171	0.875414
ITB5_MOUSE	Integrin beta-5	ITB5_MOUSE_Cys202	R.YQTNPCIGYK.L	11.7287	11.5795	12.0954	11.075	11.6729	11.6945	11.8012	0.216753	11.4808	0.287098	-0.320416	0.276283
K2C6A_MOUSE	Keratin, type II cytoskeletal 6A	K2C6A_MOUSE_Cys391	K.KQCANLQAAIADAEQR.G	13.7139	14.0222	13.4506	13.0898	13.8695	13.5952	13.7289	0.233589	13.5181	0.322957	-0.210724	0.496213
K6PF_MOUSE	6-phosphofructokinase, muscle type	K6PF_MOUSE_Cys351	R.LPLMECVQVTK.D	20.4599	20.5449	20.6257	20.4868	20.4467	20.3523	20.5435	0.0676603	20.4286	0.0563713	-0.114901	0.138769
K6PP_MOUSE	6-phosphofructokinase type C	K6PP_MOUSE_Cys111	K.AACNLAR.L	18.1635	18.2281	18.4273	18.2528	18.2256	18.1669	18.273	0.112274	18.2151	0.0358603	-0.0578995	0.525467
K6PP_MOUSE	6-phosphofructokinase type C	K6PP_MOUSE_Cys122	R.LGITNLCVIGGDGSLTGANLFR.K	17.5261	17.3815	17.3846	17.7463	17.3399	17.4844	17.4307	0.0674315	17.5235	0.168209	0.0927926	0.509069
K6PP_MOUSE	6-phosphofructokinase type C	K6PP_MOUSE_Cys359	R.LPLMECVQMTQDVQK.A	18.5556	18.4775	18.607	18.4884	18.432	18.4321	18.5467	0.0532172	18.4508	0.0265643	-0.0958701	0.0848354
K6PP_MOUSE	6-phosphofructokinase type C	K6PP_MOUSE_Cys410	K.SNCNVAVINVGAPAAGMNAAVR.S	18.9521	19.2122	19.1266	18.9288	19.0591	18.9149	19.097	0.108254	18.9676	0.0649372	-0.129366	0.220855
KAP0_MOUSE	cAMP-dependent protein kinase type I-alpha regulatory subunit	KAP0_MOUSE_Cys67	R.QIQCLQK.T	21.0039	20.9263	20.9203	20.8045	20.8978	20.7649	20.9501	0.0380714	20.8224	0.0556849	-0.127742	0.0553354
KAP2_MOUSE	cAMP-dependent protein kinase type II-alpha regulatory subunit	KAP2_MOUSE_Cys131	R.LQEACKDILLFK.N	18.8835	18.8059	18.6726	18.684	18.5998	18.5197	18.7873	0.0870916	18.6012	0.0670761	-0.186146	0.0747805
KCC2B_MOUSE	Calcium/calmodulin-dependent protein kinase type II subunit beta	KCC2B_MOUSE_Cys273	K.HPWVCQR.S	17.2366	17.392	17.4966	17.443	17.4751	17.2953	17.375	0.10682	17.4045	0.0782755	0.0294294	0.769021
KCC2D_MOUSE	Calcium/calmodulin-dependent protein kinase type II subunit delta	KCC2D_MOUSE_Cys273	K.HPWICQR.S	17.4552	17.5746	17.5345	17.4546	17.341	17.3504	17.5214	0.0496142	17.382	0.0514807	-0.139435	0.0509523
KCC2D_MOUSE	Calcium/calmodulin-dependent protein kinase type II subunit delta	KCC2D_MOUSE_Cys481	R.SGSPTVPIKPPCIPNGK.E	17.4257	17.3432	17.368	17.2569	17.2062	17.2861	17.379	0.03456	17.2497	0.0330046	-0.129236	0.0187052
KCRB_MOUSE	Creatine kinase B-type	KCRB_MOUSE_Cys283	K.NYEFMWNPHLGYILTCPSNLGTGLR.A	15.5503	15.8203	15.8868	15.8153	15.7726	15.3908	15.7524	0.145523	15.6596	0.190842	-0.0928647	0.613324
KPBB_MOUSE	Phosphorylase b kinase regulatory subunit beta	KPBB_MOUSE_Cys1058	R.GTCSYLTK.V	18.7113	18.8184	18.8127	18.5866	18.5847	18.623	18.7808	0.0491878	18.5981	0.0176415	-0.182714	0.00778977
KPCD_MOUSE	Protein kinase C delta type	KPCD_MOUSE_Cys192	R.QCNAAIHKK.C	14.6759	15.2784	15.0636	15.1509	15.1617	15.1901	15.0059	0.249308	15.1676	0.01652	0.161629	0.412035
KPYM_MOUSE	Pyruvate kinase PKM	KPYM_MOUSE_Cys152	K.CDENILWLDYK.N	19.6647	19.9242	19.9679	19.721	19.7876	19.6255	19.8523	0.133847	19.7114	0.066556	-0.140873	0.253457
KPYM_MOUSE	Pyruvate kinase PKM	KPYM_MOUSE_Cys31	H.AAMADTFLEHMCR.L	18.3851	18.6587	18.139	18.4932	18.2245	18.2466	18.3943	0.212266	18.3214	0.121777	-0.0728697	0.695316
KPYM_MOUSE	Pyruvate kinase PKM	KPYM_MOUSE_Cys326	R.AGKPVICATQMLESMIKKPR.P	23.1979	22.8116	23.226	22.8459	22.935	22.7344	23.0785	0.189057	22.8384	0.0820685	-0.240075	0.174835
KPYM_MOUSE	Pyruvate kinase PKM	KPYM_MOUSE_Cys358	R.AEGSDVANAVLDGADCIM*LSGETAK.G	21.3089	21.0335	21.0464	20.0154	20.6582	20.8546	21.1296	0.126896	20.5094	0.358415	-0.620203	0.082317
KPYM_MOUSE	Pyruvate kinase PKM	KPYM_MOUSE_Cys474	R.GIFPVLCK.D	24.6933	24.6724	24.6892	24.3927	24.4131	24.347	24.6849	0.00903662	24.3843	0.0276051	-0.300683	0.000126661
KPYM_MOUSE	Pyruvate kinase PKM	KPYM_MOUSE_Cys49	R.NTGIICTIGPASR.S	25.4008	25.2521	25.3607	24.7253	25.0253	24.7901	25.3379	0.0628241	24.8469	0.128859	-0.49095	0.00838079
LACB2_MOUSE	Beta-lactamase-like protein 2	LACB2_MOUSE_Cys100	K.NINNDTTYCIK.K	18.175	18.1578	18.1089	17.7704	17.8937	17.7393	18.1472	0.0279894	17.8012	0.0666742	-0.346078	0.00248606
LAMP1_MOUSE	Lysosome-associated membrane glycoprotein 1	LAMP1_MOUSE_Cys327	K.ALQATVGNSYKCNTEEHIFVSK.M	19.2852	19.2419	19.4178	19.1171	19.0931	18.9078	19.315	0.0748201	19.0393	0.0935456	-0.275615	0.0312589
LAP2A_MOUSE	Lamina-associated polypeptide 2, isoforms alpha/zeta	LAP2A_MOUSE_Cys560	R.AATQASSTESCDK.H	11.9251	11.8725	11.9524	11.7825	11.9155	11.6874	11.9167	0.0331392	11.7951	0.0935537	-0.121554	0.158307
LAR4B_MOUSE	La-related protein 4B	LAR4B_MOUSE_Cys635	R.LPSTPTTTACK.S	17.5001	17.2879	17.3238	17.2727	17.3205	17.2531	17.3706	0.0927364	17.2821	0.0282897	-0.0885093	0.266258
LARP1_MOUSE	La-related protein 1	LARP1_MOUSE_Cys1030	R.CPSQSSSRPATGISQPPTTPTGQATR.E	12.3906	12.1856	12.5231	12.0185	12.014	12.0047	12.3664	0.138826	12.0124	0.00573107	-0.354028	0.0226895
LARP1_MOUSE	La-related protein 1	LARP1_MOUSE_Cys930	R.YGLECLFR.Y	19.1333	19.1784	19.4811	19.2096	19.0966	19.2235	19.2643	0.154439	19.1766	0.0568197	-0.0876993	0.492976
LASP1_MOUSE	LIM and SH3 domain protein 1	LASP1_MOUSE_Cys53	K.KPYCNAHYPK.Q	19.705	19.8262	19.5959	19.8091	19.7495	20.0008	19.709	0.0940873	19.8531	0.10719	0.144112	0.226224
LDHA_MOUSE	L-lactate dehydrogenase A chain	LDHA_MOUSE_Cys131	K.YSPHCK.L	21.1723	21.2055	21.6511	21.4482	21.361	21.3092	21.3429	0.218346	21.3728	0.057349	0.0298262	0.860876
LDHA_MOUSE	L-lactate dehydrogenase A chain	LDHA_MOUSE_Cys163	R.VIGSGCNLDSAR.F	21.6738	21.8566	22.0341	21.4983	21.7311	21.6568	21.8548	0.147121	21.6287	0.0970658	-0.226099	0.143855
LDHA_MOUSE	L-lactate dehydrogenase A chain	LDHA_MOUSE_Cys84	K.DYCVTANSK.L	23.0343	22.9532	23.1395	22.9382	22.9865	22.7687	23.0423	0.0762665	22.8978	0.0934023	-0.144528	0.165316
LEG1_MOUSE	Galectin-1	LEG1_MOUSE_Cys43	K.DSNNLCLHFNPR.F	15.1189	15.634	15.327	15.1756	15.4804	15.4066	15.36	0.211554	15.3542	0.129829	-0.00572668	0.975534
LEG1_MOUSE	Galectin-1	LEG1_MOUSE_Cys61	R.FNAHGDANTIVCNTK.E	20.6187	20.447	20.5387	20.1591	20.2635	20.382	20.5348	0.0701416	20.2682	0.0910423	-0.266582	0.030491
LEG3_MOUSE	Galectin-3	LEG3_MOUSE_Cys187	R.RVIVCNTK.Q	24.067	24.1652	24.1794	23.8852	23.7191	23.7949	24.1372	0.0499902	23.7997	0.067895	-0.337496	0.00480016
LETM1_MOUSE	LETM1 and EF-hand domain-containing protein 1, mitochondrial	LETM1_MOUSE_Cys378	K.ELQAACR.A	17.836	17.7959	18.0973	17.6944	17.5343	17.6015	17.9097	0.13366	17.6101	0.0656491	-0.299664	0.046589
LGMN_MOUSE	Legumain	LGMN_MOUSE_Cys52	R.HQADACHAYQIIHR.N	15.897	16.0439	15.7996	15.3119	15.8008	15.6856	15.9135	0.100424	15.5995	0.208695	-0.314042	0.12762
LIMD1_MOUSE	LIM domain-containing protein 1	LIMD1_MOUSE_Cys303	K.GTTVSAPMVPSSASQGACPK.R	15.9448	15.7338	15.7951	15.9447	15.8049	15.9471	15.8246	0.0885992	15.8989	0.066482	0.0743426	0.396289
LIMS1_MOUSE	LIM and senescent cell antigen-like-containing domain protein 1	LIMS1_MOUSE_Cys164	K.NDPYHPDHFNC#ANCGK.E	16.192	15.8687	15.8014	15.7338	15.3504	15.4116	15.954	0.170525	15.4986	0.168177	-0.455433	0.0547022
LIMS1_MOUSE	LIM and senescent cell antigen-like-containing domain protein 1	LIMS1_MOUSE_Cys222	K.CEKPFLGHR.H	14.6854	14.867	14.8067	14.4335	14.6638	14.5241	14.7864	0.0755279	14.5405	0.0947186	-0.245902	0.0454415
LIPL_MOUSE	Lipoprotein lipase	LIPL_MOUSE_Cys266	R.GLGDVDQLVKCSHER.S	16.7715	16.8425	16.226	16.5523	16.2763	16.8798	16.6134	0.27542	16.5695	0.246666	-0.0438862	0.874836
LIPL_MOUSE	Lipoprotein lipase	LIPL_MOUSE_Cys310	R.CNNLGYEINK.V	19.7353	19.6338	19.4925	19.4887	19.2596	19.2783	19.6205	0.0995846	19.3422	0.103869	-0.278334	0.0521477
LIPL_MOUSE	Lipoprotein lipase	LIPL_MOUSE_Cys445	K.KVIFCAR.E	20.4619	20.4676	20.0989	20.1658	20.0956	20.0679	20.3428	0.172459	20.1098	0.0412042	-0.23302	0.136635
LIS1_MOUSE	Platelet-activating factor acetylhydrolase IB subunit alpha	LIS1_MOUSE_Cys252	R.MVRPNQDGTLIASCSNDQTVR.V	15.9893	15.9828	15.7443	15.5424	15.4527	15.6216	15.9055	0.113981	15.5389	0.0689927	-0.36656	0.0176784
LMAN1_MOUSE	Protein ERGIC-53	LMAN1_MOUSE_Cys238	K.TLTVMINNGFTPDKNDYEFCAK.V	19.0712	18.8644	18.2794	18.6573	18.7132	18.2278	18.7383	0.335309	18.5328	0.216867	-0.205566	0.506936
LMNA_MOUSE	Prelamin-A/C	LMNA_MOUSE_Cys522	K.AQNTWGCGSSLR.T	17.9273	17.9539	17.9498	18.377	18.2661	18.0607	17.9437	0.0116792	18.2346	0.131064	0.290963	0.0352813
LONM_MOUSE	Lon protease homolog, mitochondrial	LONM_MOUSE_Cys509	K.ILCFHGPPGVGK.T	11.9086	12.0957	12.1542	11.9335	12.2119	11.2454	12.0528	0.104742	11.7969	0.406233	-0.255889	0.437
LPP1_MOUSE	Lipid phosphate phosphohydrolase 1	LPP1_MOUSE_Cys40	R.GIFCNDDSIKYPYK.E	18.5107	18.3445	18.4261	18.3449	18.3062	18.3291	18.4271	0.0678517	18.3268	0.0158719	-0.100345	0.111387
LPPRC_MOUSE	Leucine-rich PPR motif-containing protein, mitochondrial	LPPRC_MOUSE_Cys112	R.VFESTCSSGSPGSNQALLLLR.S	16.1844	15.9651	16.2985	15.8672	16.1442	15.9016	16.1493	0.138355	15.971	0.123243	-0.178309	0.245156
LPPRC_MOUSE	Leucine-rich PPR motif-containing protein, mitochondrial	LPPRC_MOUSE_Cys1321	R.DNDKVYSCSMK.S	17.3978	17.1757	17.197	17.0933	16.9944	17.0344	17.2568	0.100036	17.0407	0.0406507	-0.216125	0.047317
LPPRC_MOUSE	Leucine-rich PPR motif-containing protein, mitochondrial	LPPRC_MOUSE_Cys847	K.GDLPAALEASIACHK.K	13.7043	14.4014	14.6152	13.7867	14.6525	14.0112	14.2403	0.388895	14.1501	0.366837	-0.0901721	0.823189
LPXN_MOUSE	Leupaxin	LPXN_MOUSE_Cys152	K.GYCASC#QKPIAGK.V	16.996	16.9489	17.1599	16.911	16.9939	16.862	17.0349	0.0904202	16.9223	0.0544628	-0.112642	0.205764
LPXN_MOUSE	Leupaxin	LPXN_MOUSE_Cys329	R.GTLCHDC#GQPITGR.C	16.9634	16.9888	16.9723	17.0432	16.8459	16.7848	16.9748	0.0105168	16.8913	0.110275	-0.0835032	0.346474
LRC58_MOUSE	Leucine-rich repeat-containing protein 58	LRC58_MOUSE_Cys291	R.YLGSASNCPNPK.C	18.2633	18.2542	17.9951	17.9404	18.0901	17.9648	18.1709	0.124332	17.9985	0.0655852	-0.172381	0.157895
LRC59_MOUSE	Leucine-rich repeat-containing protein 59	LRC59_MOUSE_Cys277	R.VTGLHQQPLCTSVNTIYDNAVQGLR.H	16.6294	16.6227	16.9266	16.8646	16.9989	16.7756	16.7262	0.141705	16.8797	0.0917881	0.153473	0.267985
LRCH4_MOUSE	Leucine-rich repeat and calponin homology domain-containing protein 4	LRCH4_MOUSE_Cys454	R.AAGAGASAPSTQATCNGPPK.S	13.8193	13.7276	13.8255	13.6585	13.328	13.435	13.7908	0.044778	13.4738	0.137689	-0.316977	0.0363588
LRP1_MOUSE	Prolow-density lipoprotein receptor-related protein 1	LRP1_MOUSE_Cys1564	R.TVSCACPHLMK.L	19.5898	19.3964	19.5392	19.3767	19.5297	19.3517	19.5085	0.0818753	19.4194	0.0787041	-0.0891044	0.329395
LRP1_MOUSE	Prolow-density lipoprotein receptor-related protein 1	LRP1_MOUSE_Cys1566	R.TVSCACPHLMK.L	19.5898	19.3964	19.5392	19.3767	19.5297	19.3517	19.5085	0.0818753	19.4194	0.0787041	-0.0891044	0.329395
LRP1_MOUSE	Prolow-density lipoprotein receptor-related protein 1	LRP1_MOUSE_Cys2160	K.GTNVCAVANGGCQQLCLYR.G	17.115	17.5626	17.5605	17.0778	16.8823	17.0934	17.4127	0.210544	17.0179	0.0960364	-0.394853	0.0733133
LRP1_MOUSE	Prolow-density lipoprotein receptor-related protein 1	LRP1_MOUSE_Cys2167	K.GTNVCAVANGGCQQLCLYR.G	17.115	17.5626	17.5605	17.0778	16.8823	17.0934	17.4127	0.210544	17.0179	0.0960364	-0.394853	0.0733133
LRP1_MOUSE	Prolow-density lipoprotein receptor-related protein 1	LRP1_MOUSE_Cys2171	K.GTNVCAVANGGCQQLCLYR.G	17.115	17.5626	17.5605	17.0778	16.8823	17.0934	17.4127	0.210544	17.0179	0.0960364	-0.394853	0.0733133
LRP1_MOUSE	Prolow-density lipoprotein receptor-related protein 1	LRP1_MOUSE_Cys2953	K.LSGCSQDCEDLK.I	19.5301	19.4328	19.2204	18.9173	19.1423	18.9115	19.3944	0.129312	18.9904	0.107456	-0.404053	0.0273118
LRP1_MOUSE	Prolow-density lipoprotein receptor-related protein 1	LRP1_MOUSE_Cys2957	K.LSGCSQDCEDLK.I	19.5301	19.4328	19.2204	18.9173	19.1423	18.9115	19.3944	0.129312	18.9904	0.107456	-0.404053	0.0273118
LRP1_MOUSE	Prolow-density lipoprotein receptor-related protein 1	LRP1_MOUSE_Cys3295	R.QPDVPNHPCK.V	17.4437	17.2958	17.3681	17.0614	17.1019	17.0153	17.3692	0.0604047	17.0595	0.0353781	-0.309686	0.00332878
LRP1_MOUSE	Prolow-density lipoprotein receptor-related protein 1	LRP1_MOUSE_Cys3474	R.VWVCDR.D	21.0855	20.8704	20.6632	20.4638	20.5851	20.3874	20.873	0.172403	20.4788	0.0813854	-0.394283	0.0430375
LRP1_MOUSE	Prolow-density lipoprotein receptor-related protein 1	LRP1_MOUSE_Cys3808	K.AAYCACR.S	20.9657	20.8671	20.8648	20.4943	20.5896	20.3613	20.8992	0.0470254	20.4817	0.0936325	-0.417484	0.0048811
LRP1_MOUSE	Prolow-density lipoprotein receptor-related protein 1	LRP1_MOUSE_Cys3810	K.AAYCACR.S	20.9657	20.8671	20.8648	20.4943	20.5896	20.3613	20.8992	0.0470254	20.4817	0.0936325	-0.417484	0.0048811
LRP1_MOUSE	Prolow-density lipoprotein receptor-related protein 1	LRP1_MOUSE_Cys41	R.DQITCISK.G	20.2634	20.1913	19.9683	19.6595	19.7508	19.6564	20.141	0.125612	19.6889	0.0437692	-0.452106	0.00860631
LRP1_MOUSE	Prolow-density lipoprotein receptor-related protein 1	LRP1_MOUSE_Cys4152	K.QPEVTNPCDR.K	16.0926	16.108	16.0152	15.9143	15.8112	15.7698	16.0719	0.0405882	15.8318	0.0607588	-0.240175	0.00967242
LRP1_MOUSE	Prolow-density lipoprotein receptor-related protein 1	LRP1_MOUSE_Cys4348	R.CLQGACVVNK.Q	18.6042	18.513	18.2901	18.0288	18.1734	18.0291	18.4691	0.131941	18.0771	0.068105	-0.392007	0.0202322
LRP1_MOUSE	Prolow-density lipoprotein receptor-related protein 1	LRP1_MOUSE_Cys4353	R.CLQGACVVNK.Q	18.6042	18.513	18.2901	18.0288	18.1734	18.0291	18.4691	0.131941	18.0771	0.068105	-0.392007	0.0202322
LRP1_MOUSE	Prolow-density lipoprotein receptor-related protein 1	LRP1_MOUSE_Cys808	R.MYDAQQQQVGTNKCR.V	15.6748	15.6478	15.6097	15.1876	15.3676	15.6692	15.6441	0.026701	15.4081	0.198687	-0.235972	0.171316
LRP1_MOUSE	Prolow-density lipoprotein receptor-related protein 1	LRP1_MOUSE_Cys903	R.FKCENNR.C	20.1743	20.1708	19.8786	19.2948	19.5791	19.4371	20.0746	0.138582	19.437	0.116058	-0.637552	0.00755439
LUC7L_MOUSE	Putative RNA-binding protein Luc7-like 1	LUC7L_MOUSE_Cys59	R.MDLGECTK.I	18.6947	18.7326	18.854	18.7789	18.5715	18.648	18.7604	0.0679411	18.6661	0.0856432	-0.0942788	0.289596
LY86_MOUSE	Lymphocyte antigen 86	LY86_MOUSE_Cys112	K.FSFCGRR.K	16.9482	17.077	17.5022	16.9692	16.8332	16.9271	17.1758	0.236753	16.9099	0.0568373	-0.265932	0.197322
LY9_MOUSE	T-lymphocyte surface antigen Ly-9	LY9_MOUSE_Cys480	K.KQCSSLATR.Y	15.2429	15.1208	15.4367	15.1597	15.0738	15.023	15.2668	0.1301	15.0855	0.0564191	-0.181299	0.144872
LYPA2_MOUSE	Acyl-protein thioesterase 2	LYPA2_MOUSE_Cys56	K.YICPHAPR.I	18.1998	18.2068	18.3326	18.151	18.2066	18.0278	18.2464	0.0610094	18.1285	0.0747068	-0.117935	0.158834
LYZ2_MOUSE	Lysozyme C-2	LYZ2_MOUSE_Cys113	R.AVNACGINCSALLQDDITAAIQCAK.R	19.0328	18.996	19.2384	18.6986	18.9581	18.7263	19.089	0.106644	18.7943	0.116331	-0.294701	0.0575282
LYZ2_MOUSE	Lysozyme C-2	LYZ2_MOUSE_Cys95	R.AVNACGINCSALLQDDITAAIQCAK.R	19.0328	18.996	19.2384	18.6986	18.9581	18.7263	19.089	0.106644	18.7943	0.116331	-0.294701	0.0575282
LYZ2_MOUSE	Lysozyme C-2	LYZ2_MOUSE_Cys99	R.AVNACGINCSALLQDDITAAIQCAK.R	19.0328	18.996	19.2384	18.6986	18.9581	18.7263	19.089	0.106644	18.7943	0.116331	-0.294701	0.0575282
MACF1_MOUSE	Microtubule-actin cross-linking factor 1	MACF1_MOUSE_Cys5008	K.HQLEIFDALGSQACSNK.N	17.4089	17.4601	17.2161	17.4736	17.3667	17.3429	17.3617	0.105035	17.3944	0.0568421	0.0326695	0.718563
MANBA_MOUSE	Beta-mannosidase	MANBA_MOUSE_Cys153	R.SAVQYAECQSK.A	13.7094	13.6801	13.8735	13.9148	13.8035	13.5508	13.7544	0.0851254	13.7564	0.152266	0.00202535	0.987686
MAZ_MOUSE	Myc-associated zinc finger protein	MAZ_MOUSE_Cys394	K.VPCHVCGK.M	15.3867	15.1211	15.7117	15.394	14.8637	14.7269	15.4065	0.241486	14.9948	0.287701	-0.411664	0.196089
MAZ_MOUSE	Myc-associated zinc finger protein	MAZ_MOUSE_Cys397	K.VPCHVCGK.M	15.3867	15.1211	15.7117	15.394	14.8637	14.7269	15.4065	0.241486	14.9948	0.287701	-0.411664	0.196089
MBNL1_MOUSE	Muscleblind-like protein 1	MBNL1_MOUSE_Cys27	R.GTCSRPDTECK.F	13.8756	13.9822	13.5838	13.8812	13.9734	13.9061	13.8138	0.168394	13.9202	0.0389727	0.106381	0.433196
MBNL1_MOUSE	Muscleblind-like protein 1	MBNL1_MOUSE_Cys34	R.GTCSRPDTECK.F	13.8756	13.9822	13.5838	13.8812	13.9734	13.9061	13.8138	0.168394	13.9202	0.0389727	0.106381	0.433196
MCE1_MOUSE	mRNA-capping enzyme	MCE1_MOUSE_Cys565	R.CAAAAQGQK.R	13.681	13.7658	13.5305	13.269	13.4504	13.2455	13.6591	0.0973046	13.3217	0.0915665	-0.337464	0.0233375
MCM2_MOUSE	DNA replication licensing factor MCM2	MCM2_MOUSE_Cys522	R.GDINVLLCGDPGTAK.S	18.0727	17.9665	17.8748	18.0994	18.1485	17.8188	17.9713	0.0808655	18.0223	0.145251	0.0509448	0.687086
MCM5_MOUSE	DNA replication licensing factor MCM5	MCM5_MOUSE_Cys196	R.KCNMDQAGR.P	14.7493	14.6024	14.6554	14.5571	14.5603	14.5134	14.669	0.0607343	14.5436	0.0213953	-0.125432	0.0511222
MCM7_MOUSE	DNA replication licensing factor MCM7	MCM7_MOUSE_Cys566	R.YIAMCHER.Q	18.0222	17.8977	18.1143	17.7571	17.8964	17.7712	18.0114	0.088742	17.8082	0.0626357	-0.203183	0.057256
MCTS1_MOUSE	Malignant T-cell-amplified sequence 1	MCTS1_MOUSE_Cys113	K.FVLSGANIMCPGLTSPGAK.L	17.6935	17.4512	17.6634	17.5052	17.4157	17.3217	17.6027	0.107821	17.4142	0.0749141	-0.188486	0.112177
MCTS1_MOUSE	Malignant T-cell-amplified sequence 1	MCTS1_MOUSE_Cys14	K.KFDEKENVSNCIQLK.T	15.4003	14.6361	14.8882	15.122	14.4391	14.8334	14.9749	0.31792	14.7982	0.279933	-0.176701	0.586951
MDHC_MOUSE	Malate dehydrogenase, cytoplasmic	MDHC_MOUSE_Cys137	K.VIVVGNPANTNCLTASK.S	20.1418	20.0675	20.3381	19.9318	19.7164	19.8397	20.1825	0.11414	19.8293	0.088266	-0.353185	0.025778
MDHC_MOUSE	Malate dehydrogenase, cytoplasmic	MDHC_MOUSE_Cys154	K.ENFSCLTR.L	21.3928	21.4019	21.6225	21.2962	21.1468	21.1957	21.4724	0.10617	21.2129	0.0621851	-0.259522	0.0406214
MDHM_MOUSE	Malate dehydrogenase, mitochondrial	MDHM_MOUSE_Cys212	K.TIIPLISQCTPK.V	21.9468	21.9903	22.2694	21.7731	21.9349	21.6978	22.0688	0.142932	21.802	0.098906	-0.266844	0.0956898
MDHM_MOUSE	Malate dehydrogenase, mitochondrial	MDHM_MOUSE_Cys285	K.ETECTYFSTPLLLGK.K	19.6761	19.7544	19.8751	19.6419	19.7599	19.6112	19.7685	0.0818586	19.671	0.0641191	-0.097532	0.25534
MDHM_MOUSE	Malate dehydrogenase, mitochondrial	MDHM_MOUSE_Cys89	K.GYLGPEQLPDCLK.G	22.3096	22.3611	22.4472	22.2474	22.2371	22.2129	22.3726	0.0567561	22.2325	0.0144419	-0.140189	0.0276505
MDR1A_MOUSE	Multidrug resistance protein 1A	MDR1A_MOUSE_Cys1070	K.KGQTLALVGSSGCGK.S	18.1121	18.3404	18.1987	17.7908	17.9755	17.8498	18.2171	0.0941017	17.8721	0.0770219	-0.345012	0.0159651
METK2_MOUSE	S-adenosylmethionine synthase isoform type-2	METK2_MOUSE_Cys56	K.VACETVAK.T	19.9262	19.9025	20.108	20.0278	19.9437	20.0617	19.9789	0.0918189	20.0111	0.0496048	0.0321526	0.685534
MIF_MOUSE	Macrophage migration inhibitory factor	MIF_MOUSE_Cys81	K.LLCGLLSDR.L	20.3429	20.3054	20.5024	20.1519	19.8962	20.0167	20.3836	0.0854055	20.0216	0.104448	-0.361953	0.0192039
MINP1_MOUSE	Multiple inositol polyphosphate phosphatase 1	MINP1_MOUSE_Cys331	R.SSCNLFQDIFLHLDK.A	17.7492	17.5657	17.481	17.3734	17.541	17.0916	17.5986	0.111939	17.3353	0.185439	-0.263259	0.160772
MIP18_MOUSE	Mitotic spindle-associated MMXD complex subunit MIP18	MIP18_MOUSE_Cys158	R.VAAALENTHLLEVVNQCLSAR.S	18.1712	18.143	18.5223	18.0509	18.3175	18.0826	18.2789	0.172536	18.1504	0.118923	-0.128503	0.434739
MK01_MOUSE	Mitogen-activated protein kinase 1	MK01_MOUSE_Cys38	R.YTNLSYIGEGAYGMVCSAYDNLNK.V	16.9615	17.1678	17.3274	17.1148	16.8825	16.9991	17.1522	0.149773	16.9988	0.0948389	-0.153434	0.288109
MK03_MOUSE	Mitogen-activated protein kinase 3	MK03_MOUSE_Cys179	R.DLKPSNLLINTTCDLK.I	19.4624	19.4002	19.6443	19.3515	19.768	19.2215	19.5023	0.103574	19.447	0.233112	-0.0553076	0.774424
MKRN2_MOUSE	Probable E3 ubiquitin-protein ligase makorin-2	MKRN2_MOUSE_Cys337	K.GTCPFGSK.C	19.1838	19.2772	19.2702	19.3343	19.1827	19.1543	19.2437	0.042453	19.2237	0.0790338	-0.0200013	0.768304
MMS19_MOUSE	MMS19 nucleotide excision repair protein homolog	MMS19_MOUSE_Cys357	R.ADAEDLLGSFLSNILQDCR.H	16.1391	15.9103	16.0797	16.2413	16.257	16.1829	16.043	0.0969124	16.2271	0.0318609	0.184032	0.063226
MOES_MOUSE	Moesin	MOES_MOUSE_Cys284	R.ILALCMGNHELYM*R.R	19.751	19.6239	19.7595	19.7111	19.5573	19.5271	19.7115	0.0620268	19.5985	0.0805763	-0.112944	0.191322
MOS1_MOUSE	Mitochondrial inner membrane organizing system protein 1	MOS1_MOUSE_Cys13	R.CMADTVVK.L	20.8022	20.6133	20.3449	20.1645	20.2135	20.0861	20.5868	0.187614	20.1547	0.0524627	-0.432095	0.0349568
MOSC2_MOUSE	MOSC domain-containing protein 2, mitochondrial	MOSC2_MOUSE_Cys301	R.LCDPSVK.S	20.7851	20.7623	20.933	20.8247	20.8506	20.8101	20.8268	0.0756812	20.8285	0.0167668	0.00170098	0.97673
MP2K3_MOUSE	Dual specificity mitogen-activated protein kinase kinase 3	MP2K3_MOUSE_Cys227	K.TMDAGCKPYMAPER.I	17.689	17.6616	17.6081	17.5446	17.4789	17.5354	17.6529	0.0335755	17.5197	0.0290489	-0.133241	0.0132194
MP2K3_MOUSE	Dual specificity mitogen-activated protein kinase kinase 3	MP2K3_MOUSE_Cys29	R.ISCVSKPPVSNPTPPR.N	19.1531	18.7761	19.0085	18.7971	18.7433	18.6985	18.9792	0.155297	18.7463	0.0402897	-0.232938	0.109284
MPCP_MOUSE	Phosphate carrier protein, mitochondrial	MPCP_MOUSE_Cys131	K.GWAPTLIGYSMQGLCK.F	17.2135	17.2418	17.2966	17.4492	17.2179	17.5269	17.2506	0.0344598	17.398	0.131246	0.147331	0.199461
MPEG1_MOUSE	Macrophage-expressed gene 1 protein	MPEG1_MOUSE_Cys34	A.DKPLGETGTTGFQICK.N	18.2803	18.0798	17.9966	17.8597	17.7684	17.5782	18.1189	0.119108	17.7354	0.117257	-0.383495	0.0315292
MPPA_MOUSE	Mitochondrial-processing peptidase subunit alpha	MPPA_MOUSE_Cys465	R.KLPHELCTLIR.N	14.0314	14.2646	14.8862	14.3645	14.4253	14.4164	14.3941	0.360799	14.4021	0.0268401	0.0079978	0.976558
MPRD_MOUSE	Cation-dependent mannose-6-phosphate receptor	MPRD_MOUSE_Cys133	K.GGDEYDNHCGK.E	17.1416	17.2281	16.9239	17.0537	17.1125	16.8452	17.0979	0.127958	17.0038	0.114668	-0.0940629	0.48202
MPRD_MOUSE	Cation-dependent mannose-6-phosphate receptor	MPRD_MOUSE_Cys146	R.AVVMISCNR.H	24.4555	24.4801	24.3395	24.4617	24.2585	24.1227	24.425	0.0613242	24.281	0.1393	-0.144038	0.25179
MPRD_MOUSE	Cation-dependent mannose-6-phosphate receptor	MPRD_MOUSE_Cys33	K.SCDLVGEK.D	22.9797	22.8793	22.4558	22.4288	22.7199	22.32	22.7716	0.227037	22.4896	0.168822	-0.282015	0.231442
MPRI_MOUSE	Cation-independent mannose-6-phosphate receptor	MPRI_MOUSE_Cys1035	R.FICNDDIYPGAPK.F	19.0431	19.0113	19.1979	19.3523	19.2503	19.0999	19.0841	0.0815403	19.2342	0.103674	0.15006	0.182911
MPRI_MOUSE	Cation-independent mannose-6-phosphate receptor	MPRI_MOUSE_Cys1220	E.GDNCQVK.D	15.8494	15.7555	15.4616	15.1751	15.0528	15.0382	15.6889	0.165185	15.0887	0.0613769	-0.600171	0.0085444
MPRI_MOUSE	Cation-independent mannose-6-phosphate receptor	MPRI_MOUSE_Cys1275	K.AVSSCQEK.K	17.1277	17.107	16.8806	16.5599	16.6629	16.5752	17.0384	0.111915	16.5993	0.0454091	-0.439065	0.00678591
MPRI_MOUSE	Cation-independent mannose-6-phosphate receptor	MPRI_MOUSE_Cys1469	R.FTCSDNQVNSR.P	16.7325	16.6321	16.6837	16.4941	16.4492	16.6441	16.6827	0.0409791	16.5292	0.0833353	-0.153588	0.0794722
MPRI_MOUSE	Cation-independent mannose-6-phosphate receptor	MPRI_MOUSE_Cys1591	R.LSYKDQVLQLVYENGSPCPSLSDLR.Y	15.9781	15.5719	15.9957	15.9797	16.1299	15.6156	15.8485	0.195772	15.9084	0.215941	0.0598533	0.785941
MPRI_MOUSE	Cation-independent mannose-6-phosphate receptor	MPRI_MOUSE_Cys2032	R.VYKGPLDCSER.A	20.0902	19.9469	19.7065	19.7162	19.8849	19.6953	19.9145	0.15832	19.7655	0.0848654	-0.149072	0.305656
MPRI_MOUSE	Cation-independent mannose-6-phosphate receptor	MPRI_MOUSE_Cys369	K.VSLCNNK.E	15.7428	15.4853	15.8114	15.5071	15.6932	15.4687	15.6798	0.140365	15.5563	0.0980104	-0.123509	0.365283
MPRI_MOUSE	Cation-independent mannose-6-phosphate receptor	MPRI_MOUSE_Cys470	K.EKEDLLCGAINGK.K	17.824	17.9607	18.0208	17.9608	18.0203	17.7471	17.9352	0.0823078	17.9094	0.117319	-0.0257369	0.812037
MPRI_MOUSE	Cation-independent mannose-6-phosphate receptor	MPRI_MOUSE_Cys724	R.ATLITFLCDR.D	21.8856	21.7257	21.6228	21.4892	21.5769	21.3834	21.7447	0.108096	21.4832	0.079105	-0.261536	0.0507842
MPRI_MOUSE	Cation-independent mannose-6-phosphate receptor	MPRI_MOUSE_Cys823	R.YASACQMK.Y	19.3682	19.4849	19.4492	19.2016	19.2609	19.2186	19.4341	0.0488504	19.2271	0.0249264	-0.207034	0.00593024
MPRI_MOUSE	Cation-independent mannose-6-phosphate receptor	MPRI_MOUSE_Cys886	R.IHLVCGR.G	18.7569	18.7602	18.3699	18.3561	18.2507	18.1708	18.629	0.183199	18.2592	0.0759038	-0.369826	0.057733
MPRI_MOUSE	Cation-independent mannose-6-phosphate receptor	MPRI_MOUSE_Cys964	K.TFVFNICGAMPACGTVAGKPAYGCEAETQIEDIK.D	17.9943	17.9632	17.9665	17.9904	18.3564	18.1246	17.9747	0.0139586	18.1571	0.151174	0.182415	0.1645
MPRI_MOUSE	Cation-independent mannose-6-phosphate receptor	MPRI_MOUSE_Cys970	K.TFVFNICGAMPACGTVAGKPAYGCEAETQIEDIK.D	17.9943	17.9632	17.9665	17.9904	18.3564	18.1246	17.9747	0.0139586	18.1571	0.151174	0.182415	0.1645
MSH2_MOUSE	DNA mismatch repair protein Msh2	MSH2_MOUSE_Cys404	R.QAANLQDCYR.L	17.1446	17.4503	17.3338	17.1235	17.0083	17.0258	17.3096	0.125938	17.0526	0.0507007	-0.257024	0.055378
MSH2_MOUSE	DNA mismatch repair protein Msh2	MSH2_MOUSE_Cys843	R.HVIACAK.Q	18.35	18.2335	18.4422	18.0446	18.1501	18.1267	18.3419	0.0853679	18.1071	0.0452376	-0.234822	0.0263588
MT1_MOUSE	Metallothionein-1	MT1_MOUSE_Cys33	K.SCC#SC#CPVGCSK.C	21.511	21.1461	21.5797	20.7918	20.8198	20.8621	21.4122	0.190302	20.8246	0.0288925	-0.587648	0.0124713
MT1_MOUSE	Metallothionein-1	MT1_MOUSE_Cys34	K.SC#CSCCPVGC#SK.C	20.7077	20.2623	20.7815	19.8777	19.8875	19.9869	20.5838	0.229365	19.9174	0.049361	-0.666464	0.0159001
MT1_MOUSE	Metallothionein-1	MT1_MOUSE_Cys36	K.SC#CSCCPVGC#SK.C	19.3107	19.1465	19.4081	18.6917	18.5228	18.7107	19.2884	0.107939	18.6417	0.0844645	-0.646722	0.00262103
MT1_MOUSE	Metallothionein-1	MT1_MOUSE_Cys37	K.SC#CSCCPVGC#SK.C	22.1645	21.7708	22.2351	21.406	21.4277	21.4899	22.0568	0.204285	21.4412	0.0355649	-0.615627	0.0137105
MT1_MOUSE	Metallothionein-1	MT1_MOUSE_Cys41	K.SCC#SC#CPVGCSK.C	19.949	19.8762	20.2297	19.5726	19.3376	19.5467	20.0183	0.15239	19.4856	0.10522	-0.532666	0.0152503
MT1_MOUSE	Metallothionein-1	MT1_MOUSE_Cys44	K.CAQGCVCK.G	23.0913	22.9834	23.0144	22.3276	22.4087	22.4461	23.0297	0.0453715	22.3941	0.0494578	-0.635589	0.000179778
MT1_MOUSE	Metallothionein-1	MT1_MOUSE_Cys48	K.CAQGCVCK.G	21.123	21.5377	21.2863	20.8285	20.8263	20.8743	21.3157	0.170553	20.843	0.0221242	-0.47264	0.0177427
MT1_MOUSE	Metallothionein-1	MT1_MOUSE_Cys50	K.CAQGCVCK.G	21.123	21.5377	21.2863	20.8285	20.8263	20.8743	21.3157	0.170553	20.843	0.0221242	-0.47264	0.0177427
MT2_MOUSE	Metallothionein-2	MT2_MOUSE_Cys33	K.SCC#SC#CPVGC#AK.C	20.7736	20.257	20.7806	20.0441	20.2273	20.1244	20.6037	0.245176	20.1319	0.0749733	-0.471826	0.0598837
MT2_MOUSE	Metallothionein-2	MT2_MOUSE_Cys34	K.SC#CSCC#PVGCAK.C	19.8264	19.5016	19.7615	19.1666	19.1908	19.1797	19.6965	0.140329	19.1791	0.0098708	-0.517436	0.00650823
MT2_MOUSE	Metallothionein-2	MT2_MOUSE_Cys36	K.SC#CSCC#PVGCAK.C	20.1256	19.7946	20.1471	19.5968	19.6839	19.64	20.0224	0.161334	19.6402	0.0355515	-0.382194	0.0307392
MT2_MOUSE	Metallothionein-2	MT2_MOUSE_Cys37	K.SC#CSC#CPVGC#AK.C	20.5899	20.0505	20.5441	19.7417	19.9078	19.811	20.3948	0.244217	19.8202	0.068113	-0.574689	0.0327269
MT2_MOUSE	Metallothionein-2	MT2_MOUSE_Cys41	K.SC#CSCC#PVGCAK.C	18.4724	18.3522	18.4185	17.9814	17.8525	17.9286	18.4144	0.0491699	17.9208	0.0529409	-0.493537	0.000642415
MTDC_MOUSE	Bifunctional methylenetetrahydrofolate dehydrogenase/cyclohydrolase, mitochondrial	MTDC_MOUSE_Cys145	K.VCNAVSPDKDVDGFHVINVGR.M	17	16.8167	17.2709	16.4131	16.5283	16.0204	17.0292	0.186557	16.3206	0.217435	-0.708559	0.0249506
MYO1E_MOUSE	Unconventional myosin-Ie	MYO1E_MOUSE_Cys1055	K.PKPQVPQCK.A	19.0947	19.057	19.2057	18.9739	18.9385	18.8067	19.1192	0.0631132	18.9064	0.0719379	-0.212792	0.0346946
MYO1E_MOUSE	Unconventional myosin-Ie	MYO1E_MOUSE_Cys579	K.CTPHYIR.C	17.7757	17.7458	17.8224	17.6764	17.5801	17.6852	17.7813	0.0315131	17.6472	0.047622	-0.134051	0.0293836
MYOF_MOUSE	Myoferlin	MYOF_MOUSE_Cys1389	R.CDPYAGKEDIVPQLK.A	17.8997	17.77	17.9368	17.7813	17.6147	17.7339	17.8688	0.0714936	17.71	0.0700769	-0.158853	0.0882264
MYOF_MOUSE	Myoferlin	MYOF_MOUSE_Cys212	R.QLCGNNIRPVVK.V	21.1862	21.1211	21.3069	21.1191	21.1561	20.9899	21.2047	0.0769693	21.0884	0.071241	-0.116322	0.191837
NAA15_MOUSE	N-alpha-acetyltransferase 15, NatA auxiliary subunit	NAA15_MOUSE_Cys529	R.HFIEITDDQFDFHTYCMR.K	14.637	14.8516	14.723	14.796	14.2353	14.511	14.7372	0.0881617	14.5141	0.228947	-0.223085	0.267851
NAGPA_MOUSE	N-acetylglucosamine-1-phosphodiester alpha-N-acetylglucosaminidase	NAGPA_MOUSE_Cys116	R.TFSVLEPGGAGGCAQK.R	18.8175	18.6983	18.5628	18.4486	18.3766	18.2848	18.6929	0.104045	18.37	0.0670709	-0.32287	0.0210448
NB5R3_MOUSE	NADH-cytochrome b5 reductase 3	NB5R3_MOUSE_Cys284	R.DHLPTPGEEPLILMC#GPPPMIQFACLPNLER.V	13.4357	13.1306	15.9106	15.5603	12.9335	15.6853	14.159	1.24483	14.7263	1.26876	0.567379	0.675074
NCBP1_MOUSE	Nuclear cap-binding protein subunit 1	NCBP1_MOUSE_Cys320	R.FVIEENLHCIIK.S	18.4779	18.6024	18.4953	18.4951	18.5087	18.4326	18.5252	0.0550555	18.4788	0.0331351	-0.046402	0.364879
NCEH1_MOUSE	Neutral cholesterol ester hydrolase 1	NCEH1_MOUSE_Cys345	K.TYILTCEHDVLRDDGIMYAK.R	16.0452	16.1958	15.9804	15.7114	14.9303	15.9411	16.0738	0.0902224	15.5276	0.432647	-0.546216	0.155407
NCF1_MOUSE	Neutrophil cytosol factor 1	NCF1_MOUSE_Cys111	R.CPHLLDFFK.V	17.5304	17.3736	17.7133	17.0912	17.2855	17.0292	17.5391	0.138814	17.1353	0.109203	-0.403828	0.0318698
NCF2_MOUSE	Neutrophil cytosol factor 2	NCF2_MOUSE_Cys291	K.GLVPCNYLEPVELR.I	19.6794	19.7076	19.8094	19.6659	19.6665	19.4516	19.7321	0.0558214	19.5947	0.10119	-0.137469	0.16781
NCOAT_MOUSE	Bifunctional protein NCOAT	NCOAT_MOUSE_Cys596	R.ANSSVVSVNCK.G	17.847	17.8845	17.771	17.5808	17.594	17.4741	17.8342	0.0472179	17.5496	0.0536941	-0.284527	0.0049042
NDC1_MOUSE	Nucleoporin NDC1	NDC1_MOUSE_Cys370	R.ECLNLLNDMTQK.L	19.0573	19.085	19.0492	18.9201	18.8759	18.9299	19.0639	0.0153496	18.9086	0.0234861	-0.155215	0.00144096
NDUA8_MOUSE	NADH dehydrogenase [ubiquinone] 1 alpha subcomplex subunit 8	NDUA8_MOUSE_Cys36	K.AAAHHYGAQCDK.T	12.8637	12.7386	12.6519	12.8303	12.8471	12.5957	12.7514	0.0869161	12.7577	0.114741	0.006244	0.954027
NDUBA_MOUSE	NADH dehydrogenase [ubiquinone] 1 beta subcomplex subunit 10	NDUBA_MOUSE_Cys113	R.LKACQQR.E	16.6838	16.5929	16.9115	16.9231	16.3576	16.7681	16.7294	0.134012	16.6829	0.238572	-0.0464832	0.821956
NDUS1_MOUSE	NADH-ubiquinone oxidoreductase 75 kDa subunit, mitochondrial	NDUS1_MOUSE_Cys463	R.HSFCEVLK.D	16.7199	16.3764	16.1573	15.9696	16.2358	16.0918	16.4179	0.231547	16.0991	0.108766	-0.318835	0.152758
NDUS1_MOUSE	NADH-ubiquinone oxidoreductase 75 kDa subunit, mitochondrial	NDUS1_MOUSE_Cys92	K.VVAACAM*PVM*K.G	18.6901	18.7989	18.5574	18.3264	18.4883	18.3696	18.6822	0.0987451	18.3948	0.0684342	-0.287399	0.027707
NDUS2_MOUSE	NADH dehydrogenase [ubiquinone] iron-sulfur protein 2, mitochondrial	NDUS2_MOUSE_Cys347	R.IIEQCLNK.M	19.1801	19.2012	19.2983	19.0401	19.0889	19.0141	19.2265	0.0514633	19.0477	0.0310055	-0.178811	0.0135982
NDUS6_MOUSE	NADH dehydrogenase [ubiquinone] iron-sulfur protein 6, mitochondrial	NDUS6_MOUSE_Cys104	K.TGTCGYCGLQFK.Q	19.4442	19.4787	19.236	19.0946	18.9388	18.76	19.3863	0.107178	18.9311	0.136717	-0.455172	0.0207366
NDUS6_MOUSE	NADH dehydrogenase [ubiquinone] iron-sulfur protein 6, mitochondrial	NDUS6_MOUSE_Cys107	K.TGTCGYCGLQFK.Q	19.4442	19.4787	19.236	19.0946	18.9388	18.76	19.3863	0.107178	18.9311	0.136717	-0.455172	0.0207366
NDUS8_MOUSE	NADH dehydrogenase [ubiquinone] iron-sulfur protein 8, mitochondrial	NDUS8_MOUSE_Cys119	K.LCEAICPAQAITIEAEPR.A	19.6218	19.6376	19.5547	19.6737	19.4285	19.337	19.6047	0.0359358	19.4797	0.142148	-0.125012	0.294345
NDUS8_MOUSE	NADH dehydrogenase [ubiquinone] iron-sulfur protein 8, mitochondrial	NDUS8_MOUSE_Cys123	K.LCEAICPAQAITIEAEPR.A	19.0331	18.8639	18.7853	18.9035	18.7295	18.7106	18.8941	0.103379	18.7812	0.0867962	-0.112854	0.302546
NDUV1_MOUSE	NADH dehydrogenase [ubiquinone] flavoprotein 1, mitochondrial	NDUV1_MOUSE_Cys425	K.QIEGHTICALGDGAAWPVQGLIR.H	17.6411	17.0764	17.2659	17.0307	17.1245	16.8307	17.3278	0.234692	16.9953	0.122538	-0.332499	0.150373
NELFB_MOUSE	Negative elongation factor B	NELFB_MOUSE_Cys141	R.ACAVEVK.R	18.5989	18.7862	18.7663	18.6338	18.6331	18.585	18.7171	0.083993	18.6173	0.0228632	-0.0997861	0.180305
NEUA_MOUSE	N-acylneuraminate cytidylyltransferase	NEUA_MOUSE_Cys430	K.VNNSCQK.-	15.4592	15.3641	15.2742	15.7581	15.7947	15.6418	15.3658	0.0755477	15.7315	0.0651953	0.365714	0.00659315
NFX1_MOUSE	Transcriptional repressor NF-X1	NFX1_MOUSE_Cys32	K.TSGLNCGTQR.R	14.1967	14.2532	14.0387	13.8821	14.0011	13.8786	14.1629	0.0907983	13.9206	0.0569512	-0.242222	0.0330255
NIBAN_MOUSE	Protein Niban	NIBAN_MOUSE_Cys41	R.QYSVAFCNHVR.S	19.7903	19.9676	19.635	19.4855	19.5253	19.4433	19.7976	0.135851	19.4847	0.0334837	-0.312894	0.0340991
NIBL1_MOUSE	Niban-like protein 1	NIBL1_MOUSE_Cys194	R.HCNNGIPENSKVEGPAFTDAIR.M	16.5747	16.7456	16.8959	16.4909	16.7597	16.5037	16.7387	0.13121	16.5847	0.123796	-0.153974	0.293891
NIBL1_MOUSE	Niban-like protein 1	NIBL1_MOUSE_Cys405	K.MQSCYEK.M	15.0191	15.3227	15.0626	14.9344	14.6513	14.9421	15.1348	0.13404	14.8426	0.135339	-0.292172	0.0958957
NICA_MOUSE	Nicastrin	NICA_MOUSE_Cys585	R.EQCQDPSKVPNESK.D	16.2487	16.3287	15.6034	15.7411	15.8073	15.3363	16.0603	0.324725	15.6282	0.208181	-0.432053	0.188354
NIF3L_MOUSE	NIF3-like protein 1	NIF3L_MOUSE_Cys147	K.GLGTCTTRPIHPSR.A	16.9076	17.1454	17.205	16.9672	17.0245	16.9639	17.086	0.128484	16.9852	0.0278187	-0.100803	0.339174
NMD3_MOUSE	60S ribosomal export protein NMD3	NMD3_MOUSE_Cys256	K.DNVVCLSPK.L	18.7788	18.7946	18.8087	18.6601	18.6541	18.5969	18.7941	0.0121974	18.637	0.0284964	-0.157024	0.00200958
NOMO1_MOUSE	Nodal modulator 1	NOMO1_MOUSE_Cys1004	R.GLLPGCMYHVQLK.A	18.4767	18.0693	18.2505	18.2167	18.335	18.2189	18.2655	0.166631	18.2568	0.0552525	-0.00865684	0.94775
NOMO1_MOUSE	Nodal modulator 1	NOMO1_MOUSE_Cys108	R.VDGVSDICTK.G	19.9137	19.7888	19.4509	19.5476	19.6224	19.3897	19.7178	0.195477	19.5199	0.0970138	-0.19791	0.268929
NOP16_MOUSE	Nucleolar protein 16	NOP16_MOUSE_Cys36	R.IECSHIR.H	17.8387	17.6326	17.6914	17.7869	17.7078	17.5557	17.7209	0.0866829	17.6835	0.0959171	-0.0373987	0.703422
NPC2_MOUSE	Epididymal secretory protein E1	NPC2_MOUSE_Cys42	K.EVNVSPCPTDPCQLHK.G	19.362	19.5994	19.4334	19.1322	19.1938	19.1556	19.465	0.099426	19.1605	0.0253874	-0.304432	0.0137449
NPC2_MOUSE	Epididymal secretory protein E1	NPC2_MOUSE_Cys47	K.EVNVSPCPTDPCQLHK.G	19.362	19.5994	19.4334	19.1322	19.1938	19.1556	19.465	0.099426	19.1605	0.0253874	-0.304432	0.0137449
NPC2_MOUSE	Epididymal secretory protein E1	NPC2_MOUSE_Cys93	R.VPFPIPEPDGCK.S	14.4355	15.2131	14.9487	14.4095	14.7739	14.8662	14.8658	0.322808	14.6832	0.197188	-0.182558	0.532388
NPTN_MOUSE	Neuroplastin	NPTN_MOUSE_Cys258	R.SENKNEGQDAMMYCK.S	18.318	18.1482	17.9959	17.8381	17.7841	17.6022	18.154	0.131566	17.7415	0.10091	-0.412559	0.0244768
NRP2_MOUSE	Neuropilin-2	NRP2_MOUSE_Cys277	R.YYLIHQEPPENFQCNVPLGMESGR.I	16.3611	16.3793	16.1882	16.0641	16.3572	16.3849	16.3095	0.0861114	16.2687	0.145106	-0.0407993	0.749596
NS1BP_MOUSE	Influenza virus NS1A-binding protein homolog	NS1BP_MOUSE_Cys274	K.QISGSSTGCLSSPNASMQSPK.H	14.2506	13.8241	14.1115	13.411	13.6238	13.6391	14.0621	0.177588	13.5579	0.104087	-0.504121	0.0257362
NU107_MOUSE	Nuclear pore complex protein Nup107	NU107_MOUSE_Cys622	R.HQCLELAK.E	15.0547	15.1471	14.694	14.9066	14.7411	14.9916	14.9653	0.195485	14.8798	0.104029	-0.0855068	0.614039
NUBP1_MOUSE	Cytosolic Fe-S cluster assembly factor NUBP1	NUBP1_MOUSE_Cys25	R.GASC#QGCPNQR.L	14.72	14.2551	14.7593	14.0708	14.2658	14.184	14.5781	0.228975	14.1735	0.0799235	-0.404624	0.0777079
NUDC2_MOUSE	NudC domain-containing protein 2	NUDC2_MOUSE_Cys45	R.AQDIQCGLQSR.H	17.5285	17.5424	17.3717	17.1053	17.2102	17.1776	17.4808	0.0773799	17.1644	0.0438685	-0.316488	0.00732402
NXF1_MOUSE	Nuclear RNA export factor 1	NXF1_MOUSE_Cys587	K.CLQDNNWDYTR.S	17.4931	17.5193	17.3903	17.3586	17.3518	17.3137	17.4676	0.0556939	17.3414	0.0197722	-0.126168	0.0391971
NXT1_MOUSE	NTF2-related export protein 1	NXT1_MOUSE_Cys132	K.IASDCFR.F	19.6431	19.599	19.7374	19.5745	19.5362	19.6144	19.6598	0.0577223	19.5751	0.0319188	-0.0847551	0.143343
ODO1_MOUSE	2-oxoglutarate dehydrogenase, mitochondrial	ODO1_MOUSE_Cys566	K.ICEEAFTR.S	19.2869	19.1997	19.262	19.0305	19.1178	19.095	19.2496	0.0366835	19.0811	0.036972	-0.168497	0.0102202
ODO1_MOUSE	2-oxoglutarate dehydrogenase, mitochondrial	ODO1_MOUSE_Cys904	R.LLFCTGK.V	20.698	20.6531	20.6804	20.5028	20.5206	20.4389	20.6772	0.018485	20.4874	0.0351024	-0.189717	0.0024935
ODP2_MOUSE	Dihydrolipoyllysine-residue acetyltransferase component of pyruvate dehydrogenase complex, mitochondrial	ODP2_MOUSE_Cys163	R.DVPVGSIICITVEKPQDIEAFK.N	17.591	17.5973	17.8881	17.401	17.5644	17.332	17.6921	0.138568	17.4324	0.0974488	-0.259706	0.0960154
ODP2_MOUSE	Dihydrolipoyllysine-residue acetyltransferase component of pyruvate dehydrogenase complex, mitochondrial	ODP2_MOUSE_Cys290	R.DVPLGAPLCIIVEK.Q	17.7683	17.7395	17.7149	17.6211	17.5909	17.5519	17.7409	0.021801	17.588	0.0283123	-0.152899	0.00376326
OFUT1_MOUSE	GDP-fucose protein O-fucosyltransferase 1	OFUT1_MOUSE_Cys272	K.DGTAGSHFMASPQCVGYSR.S	16.441	16.5437	16.3703	16.3723	16.3319	16.1704	16.4516	0.0711746	16.2916	0.0872104	-0.160085	0.114644
OFUT1_MOUSE	GDP-fucose protein O-fucosyltransferase 1	OFUT1_MOUSE_Cys43	S.AGSWDLAGYLLYCPCMGR.F	17.8481	17.7037	17.9936	17.738	17.625	17.5058	17.8485	0.118343	17.6229	0.0948225	-0.225526	0.103279
OFUT1_MOUSE	GDP-fucose protein O-fucosyltransferase 1	OFUT1_MOUSE_Cys45	S.AGSWDLAGYLLYCPCMGR.F	17.8481	17.7037	17.9936	17.738	17.625	17.5058	17.8485	0.118343	17.6229	0.0948225	-0.225526	0.103279
OGT1_MOUSE	UDP-N-acetylglucosamine--peptide N-acetylglucosaminyltransferase 110 kDa subunit	OGT1_MOUSE_Cys531	R.HGNLCLDK.I	18.9429	18.7688	18.9522	18.5971	18.7349	18.5818	18.888	0.0843468	18.6379	0.0688152	-0.25004	0.031424
OLA1_MOUSE	Obg-like ATPase 1	OLA1_MOUSE_Cys187	K.LKPEYDIMCK.V	19.7466	19.4905	19.7894	19.7927	19.5446	19.4729	19.6755	0.13196	19.6034	0.137017	-0.0721095	0.620326
OLA1_MOUSE	Obg-like ATPase 1	OLA1_MOUSE_Cys75	R.FDFLCQYHKPASK.I	15.5711	14.9993	14.6247	15.1717	15.3323	15.0499	15.065	0.389154	15.1846	0.115648	0.119604	0.698329
OPA1_MOUSE	Dynamin-like 120 kDa protein, mitochondrial	OPA1_MOUSE_Cys786	R.TQEQCVHNETK.N	12.3607	12.448	12.4684	12.1735	12.2571	12.0135	12.4257	0.0467035	12.148	0.101054	-0.277655	0.0242918
OSGEP_MOUSE	Probable tRNA threonylcarbamoyladenosine biosynthesis protein Osgep	OSGEP_MOUSE_Cys252	R.AMAHCGSK.E	15.2903	15.2042	15.8408	15.0752	14.9364	15.0032	15.4451	0.281986	15.0049	0.056685	-0.440151	0.0964397
OSTC_MOUSE	Oligosaccharyltransferase complex subunit OSTC	OSTC_MOUSE_Cys14	R.VPFLVLECPNLK.L	16.6911	16.4413	16.7991	16.6058	16.7004	16.6553	16.6439	0.149827	16.6538	0.0386192	0.00996805	0.931785
OSTF1_MOUSE	Osteoclast-stimulating factor 1	OSTF1_MOUSE_Cys185	K.LALDMATNAACASLLKK.K	18.7877	18.5363	18.7585	18.3356	18.4634	18.269	18.6942	0.112261	18.356	0.0806691	-0.338152	0.0258326
OTUB1_MOUSE	Ubiquitin thioesterase OTUB1	OTUB1_MOUSE_Cys91	K.TRPDGNCFYR.A	14.9333	15.6273	14.7619	15.0043	14.3963	13.9037	15.1075	0.374168	14.4348	0.450135	-0.672722	0.179417
OXA1L_MOUSE	Mitochondrial inner membrane protein OXA1L	OXA1L_MOUSE_Cys148	R.CLVFPLIVK.G	19.1197	19.2829	19.5032	19.0285	19.0421	19.0307	19.3019	0.157143	19.0338	0.00593266	-0.268124	0.0734533
P4HA1_MOUSE	Prolyl 4-hydroxylase subunit alpha-1	P4HA1_MOUSE_Cys503	R.HAACPVLVGNK.W	19.5741	19.7084	19.2596	19.5048	19.1491	19.4782	19.5141	0.188079	19.3773	0.161769	-0.13673	0.479255
P4R3A_MOUSE	Serine/threonine-protein phosphatase 4 regulatory subunit 3A	P4R3A_MOUSE_Cys98	K.ICQVQGK.D	19.3691	19.3603	19.4103	19.0904	19.2296	19.2167	19.3799	0.0218257	19.1789	0.0628159	-0.201002	0.0129027
P5CR1_MOUSE	Pyrroline-5-carboxylate reductase 1, mitochondrial	P5CR1_MOUSE_Cys262	R.SLLINAVEASCIR.T	15.9225	16.0147	15.9438	15.9299	15.834	15.6706	15.9603	0.0394244	15.8115	0.107029	-0.148838	0.138721
PA24A_MOUSE	Cytosolic phospholipase A2	PA24A_MOUSE_Cys619	K.ECYVFKPK.N	20.3819	20.1999	20.3985	20.0668	20.0265	20.0984	20.3268	0.089958	20.0639	0.0294204	-0.262895	0.0171291
PABP1_MOUSE	Polyadenylate-binding protein 1	PABP1_MOUSE_Cys128	K.ALYDTFSAFGNILSCK.V	20.0452	20.0288	19.9117	19.9311	20.1829	19.9729	19.9952	0.0594505	20.029	0.110198	0.0337553	0.722402
PACN2_MOUSE	Protein kinase C and casein kinase substrate in neurons protein 2	PACN2_MOUSE_Cys44	R.LC#GDLMNCLHER.A	15.8802	16.1092	16.5267	15.9912	16.2742	16.0033	16.1721	0.267646	16.0895	0.13066	-0.0825082	0.715203
PARP1_MOUSE	Poly [ADP-ribose] polymerase 1	PARP1_MOUSE_Cys295	R.VADGMAFGALLPCK.E	18.9575	18.7677	18.9386	19.0223	19.016	18.8685	18.8879	0.0853751	18.9689	0.0710496	0.0810214	0.360548
PAXI_MOUSE	Paxillin	PAXI_MOUSE_Cys358	K.GVCGAC#K.K	18.9082	18.7208	18.8897	18.4278	18.5409	18.4999	18.8395	0.0843037	18.4896	0.0467506	-0.34999	0.00681714
PAXI_MOUSE	Paxillin	PAXI_MOUSE_Cys535	R.GSLCSGCQKPITGR.C	17.9648	17.9924	17.8877	17.77	17.7565	17.5279	17.9483	0.0442838	17.6848	0.111093	-0.263467	0.035681
PAXI_MOUSE	Paxillin	PAXI_MOUSE_Cys538	R.GSLCSGCQKPITGR.C	17.9648	17.9924	17.8877	17.77	17.7565	17.5279	17.9483	0.0442838	17.6848	0.111093	-0.263467	0.035681
PAXI_MOUSE	Paxillin	PAXI_MOUSE_Cys582	K.EQNDKPYCQSCFVK.L	18.147	18.3994	17.9864	17.9983	18.1095	17.8541	18.1776	0.16996	17.9873	0.104556	-0.190297	0.248741
PAXI_MOUSE	Paxillin	PAXI_MOUSE_Cys585	K.EQNDKPYC#QSCFVK.L	18.8672	18.9456	18.7327	18.6244	18.7146	18.5569	18.8485	0.0879249	18.632	0.0646093	-0.216517	0.0484978
PCBP1_MOUSE	Poly(rC)-binding protein 1	PCBP1_MOUSE_Cys109	R.LVVPATQCGSLIGK.G	21.1887	21.26	21.5017	21.3703	21.1038	21.0736	21.3168	0.133957	21.1826	0.133307	-0.134238	0.37196
PCBP1_MOUSE	Poly(rC)-binding protein 1	PCBP1_MOUSE_Cys158	R.AITIAGVPQSVTECVK.Q	20.2945	20.8364	20.6704	20.4062	20.4473	20.4176	20.6004	0.226675	20.4237	0.0173102	-0.176774	0.333208
PCBP1_MOUSE	Poly(rC)-binding protein 1	PCBP1_MOUSE_Cys194	R.VM*TIPYQPM*PASSPVICAGGQDR.C	19.4975	19.5872	19.2645	19.218	19.119	19.0867	19.4497	0.13599	19.1412	0.0558656	-0.308514	0.0412387
PCBP1_MOUSE	Poly(rC)-binding protein 1	PCBP1_MOUSE_Cys54	R.INISEGNCPER.I	20.1103	20.4912	20.4026	20.4316	20.0266	20.4056	20.3347	0.162728	20.2879	0.185108	-0.0468044	0.801549
PCBP2_MOUSE	Poly(rC)-binding protein 2	PCBP2_MOUSE_Cys109	R.LVVPASQCGSLIGK.G	22.1894	22.1771	22.4374	22.1499	22.0013	22.1354	22.268	0.119911	22.0955	0.0668699	-0.172412	0.150398
PCKGM_MOUSE	Phosphoenolpyruvate carboxykinase [GTP], mitochondrial	PCKGM_MOUSE_Cys306	R.YVAAAFPSACGK.T	19.5542	19.5124	19.541	19.1908	19.4272	19.2181	19.5359	0.0174353	19.2787	0.105584	-0.257163	0.0273158
PCNA_MOUSE	Proliferating cell nuclear antigen	PCNA_MOUSE_Cys135	K.LMDLDVEQLGIPEQEYSCVIK.M	19.53	19.7743	19.6127	19.4119	19.8272	19.7798	19.639	0.101459	19.673	0.185629	0.0339806	0.831434
PCNA_MOUSE	Proliferating cell nuclear antigen	PCNA_MOUSE_Cys162	R.DLSHIGDAVVISCAK.N	18.9786	18.8737	19.0309	18.761	18.7871	18.6441	18.9611	0.0653454	18.7307	0.0621929	-0.23036	0.0225304
PCP_MOUSE	Lysosomal Pro-X carboxypeptidase	PCP_MOUSE_Cys262	K.LSGSGSGLQSLTNILHLCSPLTSEK.I	15.1841	14.683	15.1169	14.667	14.7571	14.958	14.9947	0.222081	14.794	0.121646	-0.200655	0.325165
PCY2_MOUSE	Ethanolamine-phosphate cytidylyltransferase	PCY2_MOUSE_Cys324	K.VDLVCHGK.T	15.806	16.5615	16.0702	16.2949	15.9204	16.0662	16.1459	0.313035	16.0938	0.154108	-0.0520942	0.843093
PDC6I_MOUSE	Programmed cell death 6-interacting protein	PDC6I_MOUSE_Cys40	K.FIQQTYPSGGEEQAQYCR.A	17.2576	17.4494	17.2236	17.2239	17.2967	17.1482	17.3102	0.0993913	17.2229	0.0606372	-0.0872512	0.348984
PDIA1_MOUSE	Protein disulfide-isomerase	PDIA1_MOUSE_Cys314	K.KEECPAVR.L	17.9239	18.1654	17.9801	17.6042	17.6434	17.5613	18.0232	0.103183	17.603	0.033536	-0.420197	0.00540885
PDIA1_MOUSE	Protein disulfide-isomerase	PDIA1_MOUSE_Cys345	K.YKPESDELTAEKITEFCHRFLEGK.I	20.4651	20.6132	20.3694	20.3041	20.6486	20.2848	20.4826	0.100303	20.4125	0.167112	-0.0700945	0.637797
PDIA1_MOUSE	Protein disulfide-isomerase	PDIA1_MOUSE_Cys399	K.KNVFVEFYAPWCGHCK.Q	20.672	20.887	20.768	20.589	20.6048	20.5612	20.7757	0.087931	20.585	0.0180103	-0.19068	0.0397698
PDIA1_MOUSE	Protein disulfide-isomerase	PDIA1_MOUSE_Cys402	K.KNVFVEFYAPWCGHCK.Q	20.4735	20.6928	20.5211	20.3377	20.3599	20.3623	20.5625	0.0941816	20.3533	0.0110809	-0.20913	0.0355696
PDIA1_MOUSE	Protein disulfide-isomerase	PDIA1_MOUSE_Cys55	K.YLLVEFYAPWCGHCK.A	20.8217	20.9715	20.4249	20.4408	20.5306	20.5454	20.7394	0.230609	20.5056	0.0462213	-0.233787	0.232516
PDIA1_MOUSE	Protein disulfide-isomerase	PDIA1_MOUSE_Cys58	K.YLLVEFYAPWCGHCK.A	20.8217	20.9715	20.4249	20.4408	20.5306	20.5454	20.7394	0.230609	20.5056	0.0462213	-0.233787	0.232516
PDIA3_MOUSE	Protein disulfide-isomerase A3	PDIA3_MOUSE_Cys244	K.FIQDSIFGLCPHMTEDNKDLIQGK.D	18.0654	18.1181	17.8521	17.9167	16.5643	16.7211	18.0119	0.11503	17.0674	0.603935	-0.944477	0.0955329
PDIA3_MOUSE	Protein disulfide-isomerase A3	PDIA3_MOUSE_Cys406	K.DVLIEFYAPWCGHCK.N	19.5253	19.382	19.5482	19.4301	19.361	19.3644	19.4851	0.0735306	19.3851	0.0318154	-0.100004	0.152286
PDIA3_MOUSE	Protein disulfide-isomerase A3	PDIA3_MOUSE_Cys409	K.DVLIEFYAPWCGHCK.N	19.5253	19.382	19.5482	19.4301	19.361	19.3644	19.4851	0.0735306	19.3851	0.0318154	-0.100004	0.152286
PDIA3_MOUSE	Protein disulfide-isomerase A3	PDIA3_MOUSE_Cys57	R.VSDTGSAGLMLVEFFAPWCGHCK.R	21.0166	21.2908	20.6963	20.4575	20.4379	20.5942	21.0012	0.242953	20.4966	0.0695347	-0.504667	0.0476229
PDIA3_MOUSE	Protein disulfide-isomerase A3	PDIA3_MOUSE_Cys60	R.VSDTGSAGLMLVEFFAPWCGHCK.R	21.0166	21.2908	20.6963	20.4575	20.4379	20.5942	21.0012	0.242953	20.4966	0.0695347	-0.504667	0.0476229
PDIA3_MOUSE	Protein disulfide-isomerase A3	PDIA3_MOUSE_Cys85	K.GIVPLAKVDCTANTNTCNK.Y	21.9225	21.9316	21.7044	21.7188	21.5871	21.4046	21.8528	0.105027	21.5702	0.128828	-0.282607	0.0739922
PDIA3_MOUSE	Protein disulfide-isomerase A3	PDIA3_MOUSE_Cys92	K.GIVPLAKVDCTANTNTCNK.Y	21.8953	21.9061	21.6803	21.697	21.5575	21.3802	21.8272	0.103973	21.5449	0.129643	-0.28234	0.0741415
PDIA4_MOUSE	Protein disulfide-isomerase A4	PDIA4_MOUSE_Cys199	K.DNFDDVVNNADIILVEFYAPWCGHCK.K	14.57	15.5212	15.1444	14.4338	15.4224	14.33	15.0785	0.391127	14.7287	0.492353	-0.349817	0.475419
PDIA4_MOUSE	Protein disulfide-isomerase A4	PDIA4_MOUSE_Cys202	K.DNFDDVVNNADIILVEFYAPWCGHCK.K	14.57	15.5212	15.1444	14.4338	15.4224	14.33	15.0785	0.391127	14.7287	0.492353	-0.349817	0.475419
PDIA4_MOUSE	Protein disulfide-isomerase A4	PDIA4_MOUSE_Cys548	K.KDVLIEFYAPWCGHCK.Q	17.1131	17.1403	16.8885	17.0189	16.9268	16.8933	17.0473	0.11284	16.9464	0.0531111	-0.100937	0.316215
PDIA4_MOUSE	Protein disulfide-isomerase A4	PDIA4_MOUSE_Cys551	K.KDVLIEFYAPWCGHCK.Q	17.1131	17.1403	16.8885	17.0189	16.9268	16.8933	17.0473	0.11284	16.9464	0.0531111	-0.100937	0.316215
PDIA6_MOUSE	Protein disulfide-isomerase A6	PDIA6_MOUSE_Cys190	K.NVLDSEDVWMVEFYAPWCGHCK.N	17.8032	17.9225	18.0026	17.9881	17.9622	17.6824	17.9094	0.0819294	17.8776	0.138409	-0.0318642	0.793238
PDIA6_MOUSE	Protein disulfide-isomerase A6	PDIA6_MOUSE_Cys193	K.NVLDSEDVWMVEFYAPWCGHCK.N	17.8032	17.9225	18.0026	17.9881	17.9622	17.6824	17.9094	0.0819294	17.8776	0.138409	-0.0318642	0.793238
PDIA6_MOUSE	Protein disulfide-isomerase A6	PDIA6_MOUSE_Cys291	K.TCEEHQLCVVAVLPHILDTGAAGR.N	18.524	18.5259	18.9753	19.2471	18.8484	18.842	18.6751	0.212308	18.9792	0.189493	0.304083	0.205274
PDIA6_MOUSE	Protein disulfide-isomerase A6	PDIA6_MOUSE_Cys297	K.TCEEHQLCVVAVLPHILDTGAAGR.N	18.524	18.5259	18.9753	19.2471	18.8484	18.842	18.6751	0.212308	18.9792	0.189493	0.304083	0.205274
PDLI2_MOUSE	PDZ and LIM domain protein 2	PDLI2_MOUSE_Cys286	K.CSVNISNQAVR.I	17.5523	17.6324	17.4146	17.5548	17.4042	17.4467	17.5331	0.0899275	17.4686	0.0633886	-0.0645522	0.453333
PDLI5_MOUSE	PDZ and LIM domain protein 5	PDLI5_MOUSE_Cys418	R.TPMC#AHCNQVIR.G	15.278	15.6946	15.4635	15.1143	15.5349	15.4482	15.4787	0.170426	15.3658	0.181313	-0.112888	0.556066
PDLI5_MOUSE	PDZ and LIM domain protein 5	PDLI5_MOUSE_Cys73	K.ACTGSLNMTLQR.A	18.7623	18.8231	18.8608	18.6284	18.6353	18.5789	18.8154	0.0405894	18.6142	0.0251131	-0.2012	0.00397537
PDS5A_MOUSE	Sister chromatid cohesion protein PDS5 homolog A	PDS5A_MOUSE_Cys1092	K.SALCNADSPKDPVLPMK.F	17.8642	17.8361	17.6921	17.5357	17.2533	17.478	17.7974	0.0753551	17.4223	0.12181	-0.375101	0.0207711
PDS5A_MOUSE	Sister chromatid cohesion protein PDS5 homolog A	PDS5A_MOUSE_Cys580	R.SQLELLISPTCSC#K.Q	17.4657	17.6272	17.7837	17.4812	17.4599	17.5504	17.6255	0.129842	17.4972	0.0386652	-0.128359	0.251327
PEBP1_MOUSE	Phosphatidylethanolamine-binding protein 1	PEBP1_MOUSE_Cys133	R.YVWLVYEQEQPLSCDEPILSNK.S	16.0041	16.2514	16.1533	15.8345	16.2558	15.9968	16.1363	0.101652	16.029	0.173503	-0.107264	0.492606
PELP1_MOUSE	Proline-, glutamic acid- and leucine-rich protein 1	PELP1_MOUSE_Cys523	R.NANSDVCAAALR.G	17.2351	17.1886	17.1669	17.2148	17.2814	17.1601	17.1968	0.0284417	17.2188	0.0495733	0.021916	0.616413
PGAM1_MOUSE	Phosphoglycerate mutase 1	PGAM1_MOUSE_Cys153	R.YADLTEDQLPSCESLK.D	17.2555	17.379	17.5008	17.2374	17.0882	17.244	17.3784	0.100135	17.1899	0.071956	-0.188552	0.0966181
PGK1_MOUSE	Phosphoglycerate kinase 1	PGK1_MOUSE_Cys108	K.DC#VGPEVENACANPAAGTVILLENLR.F	19.1531	18.9776	19.3138	19.0933	19.0837	18.7121	19.1482	0.137322	18.963	0.17748	-0.185138	0.308122
PGK1_MOUSE	Phosphoglycerate kinase 1	PGK1_MOUSE_Cys316	K.TGQATVASGIPAGWMGLDCGTESSKK.Y	18.4579	18.2518	18.257	18.0353	17.9047	17.7239	18.3222	0.0959528	17.8879	0.127672	-0.434276	0.0183733
PGK1_MOUSE	Phosphoglycerate kinase 1	PGK1_MOUSE_Cys379	R.GC#ITIIGGGDTATCCAK.W	17.9798	17.8449	18.0018	17.651	17.7545	17.6778	17.9422	0.0693746	17.6944	0.0438262	-0.247727	0.0129565
PGK1_MOUSE	Phosphoglycerate kinase 1	PGK1_MOUSE_Cys380	R.GC#ITIIGGGDTATC#CAK.W	19.673	19.6038	19.7304	19.2903	19.4523	19.4545	19.6691	0.051721	19.399	0.0768868	-0.270033	0.0145986
PGK1_MOUSE	Phosphoglycerate kinase 1	PGK1_MOUSE_Cys50	K.FCLDNGAK.S	22.2034	22.2979	22.3537	21.8816	21.9431	21.9662	22.285	0.0620282	21.9303	0.0356922	-0.354701	0.00218111
PGK1_MOUSE	Phosphoglycerate kinase 1	PGK1_MOUSE_Cys99	K.DCVGPEVENACANPAAGTVILLENLR.F	17.4659	16.9299	17.8005	17.6189	17.6285	17.7205	17.3987	0.358589	17.656	0.0457705	0.257224	0.371211
PGRC2_MOUSE	Membrane-associated progesterone receptor component 2	PGRC2_MOUSE_Cys75	R.GLCSGPGAGEESPAATLPR.M	16.6735	16.6092	16.7214	16.8521	16.6967	16.4517	16.668	0.0459755	16.6668	0.164793	-0.00120045	0.992558
PHAX_MOUSE	Phosphorylated adapter RNA export protein	PHAX_MOUSE_Cys42	K.VLGGGSAACAPVSHYR.T	19.2465	19.4859	19.2698	19.2486	19.0972	19.3587	19.3341	0.107802	19.2348	0.107219	-0.0992495	0.408171
PHB_MOUSE	Prohibitin	PHB_MOUSE_Cys69	R.GVQDIVVGEGTHFLIPWVQKPIIFDCR.S	16.527	17.0252	16.1496	16.1324	16.4711	15.9681	16.5673	0.358625	16.1906	0.209431	-0.376737	0.268819
PI42B_MOUSE	Phosphatidylinositol 5-phosphate 4-kinase type-2 beta	PI42B_MOUSE_Cys30	K.HFVCQK.V	18.646	18.4432	18.3291	18.0049	17.7837	17.7148	18.4728	0.131063	17.8345	0.123733	-0.638306	0.0074468
PIPNA_MOUSE	Phosphatidylinositol transfer protein alpha isoform	PIPNA_MOUSE_Cys95	K.AWNAYPYCR.T	21.8582	21.9702	22.1693	22.0825	21.8425	21.8439	21.9992	0.12865	21.923	0.112843	-0.0762616	0.562752
PIPNB_MOUSE	Phosphatidylinositol transfer protein beta isoform	PIPNB_MOUSE_Cys187	K.ELANTPDCPR.M	17.1026	16.9537	17.1307	16.8337	16.8975	16.8391	17.0623	0.0776624	16.8567	0.0288812	-0.205595	0.0246933
PLAP_MOUSE	Phospholipase A-2-activating protein	PLAP_MOUSE_Cys116	K.DTVCSLSSGK.F	17.5344	17.5039	17.4077	17.2601	17.4307	17.3651	17.482	0.0539875	17.352	0.0702562	-0.12998	0.106669
PLAP_MOUSE	Phospholipase A-2-activating protein	PLAP_MOUSE_Cys193	R.TFLGHEDCVR.G	14.7715	15.0218	14.8222	14.8504	14.7261	14.6036	14.8718	0.108058	14.7267	0.100762	-0.145166	0.237027
PLCD_MOUSE	1-acyl-sn-glycerol-3-phosphate acyltransferase delta	PLCD_MOUSE_Cys82	K.ACPHYGK.E	16.1879	15.6804	16.2933	15.5566	15.8361	15.234	16.0539	0.267532	15.5422	0.246008	-0.511632	0.11734
PLCG2_MOUSE	1-phosphatidylinositol 4,5-bisphosphate phosphodiesterase gamma-2	PLCG2_MOUSE_Cys496	R.HYCAIADAK.L	15.7753	15.7043	16.1907	16.3081	16.2683	15.9878	15.8901	0.214532	16.1881	0.142546	0.298005	0.177136
PLEK_MOUSE	Pleckstrin	PLEK_MOUSE_Cys102	K.CIEGGQK.F	20.1014	20.0676	20.2349	19.923	20.0158	19.9044	20.1347	0.0722346	19.9477	0.0487214	-0.186913	0.0386361
PLMN_MOUSE	Plasminogen	PLMN_MOUSE_Cys316	R.TPENFPCK.N	22.1065	22.1256	21.8568	21.895	21.9716	21.7869	22.0296	0.122475	21.8845	0.0757714	-0.14513	0.227249
PLP2_MOUSE	Proteolipid protein 2	PLP2_MOUSE_Cys12	R.LSAPGCWLACTSFSR.T	19.6558	19.4499	19.3883	19.5586	19.3761	19.2973	19.498	0.114371	19.4107	0.109436	-0.0873122	0.478938
PLP2_MOUSE	Proteolipid protein 2	PLP2_MOUSE_Cys16	R.LSAPGCWLACTSFSR.T	19.6558	19.4499	19.3883	19.5586	19.3761	19.2973	19.498	0.114371	19.4107	0.109436	-0.0873122	0.478938
PLSI_MOUSE	Plastin-1	PLSI_MOUSE_Cys620	K.MVMTVFACLMGK.G	16.2236	16.0115	16.517	15.8963	16.1428	15.8532	16.2507	0.207236	15.9641	0.127585	-0.286589	0.17116
PLSL_MOUSE	Plastin-2	PLSL_MOUSE_Cys140	K.ALENDPDCR.H	15.7204	15.7565	15.6858	15.614	15.5897	15.6425	15.7209	0.0288912	15.6154	0.0215444	-0.105479	0.0143877
PLSL_MOUSE	Plastin-2	PLSL_MOUSE_Cys164	R.HVIPMNPNTDDLFNAVGDGIVLCK.M	20.4814	20.4671	20.5277	20.2722	20.3129	20.3203	20.492	0.0258569	20.3018	0.0211363	-0.190262	0.00128869
PLSL_MOUSE	Plastin-2	PLSL_MOUSE_Cys31	K.VDTDGNGYISCNELNDLFK.A	18.6149	18.5671	18.8568	18.4194	18.4449	18.3164	18.6796	0.12682	18.3935	0.0555622	-0.286075	0.0431573
PLSL_MOUSE	Plastin-2	PLSL_MOUSE_Cys336	R.AECMLQQAER.L	22.5959	22.3779	22.7193	22.4836	22.517	22.3774	22.5644	0.14116	22.4593	0.0595254	-0.105061	0.387041
PLSL_MOUSE	Plastin-2	PLSL_MOUSE_Cys460	K.KLENCNYAVDLGKNQAK.F	22.9755	22.9445	23.2579	22.7221	22.7956	22.8194	23.0593	0.14098	22.779	0.0414005	-0.28027	0.0542313
PLXB2_MOUSE	Plexin-B2	PLXB2_MOUSE_Cys1083	R.MDGHCAPLR.T	19.7542	19.8116	19.6386	19.6081	19.4365	19.583	19.7348	0.0719357	19.5425	0.07568	-0.192278	0.0597789
PLXB2_MOUSE	Plexin-B2	PLXB2_MOUSE_Cys1488	K.VLNCDTISQVK.E	18.9321	18.9579	19.0077	18.7768	18.7765	18.6975	18.9659	0.0313586	18.7503	0.0373402	-0.215658	0.00333212
PLXB2_MOUSE	Plexin-B2	PLXB2_MOUSE_Cys848	K.ITVAGQNCAFEPR.G	18.9806	19.033	18.9757	18.8132	18.7714	18.7239	18.9964	0.0259542	18.7695	0.0364768	-0.226925	0.0020049
PLXB2_MOUSE	Plexin-B2	PLXB2_MOUSE_Cys983	R.VPSPGISFTYCENPMIR.A	20.0353	19.9378	19.6644	19.5366	19.6893	19.6359	19.8792	0.157022	19.6206	0.0632631	-0.25856	0.0968898
PNPT1_MOUSE	Polyribonucleotide nucleotidyltransferase 1, mitochondrial	PNPT1_MOUSE_Cys459	K.ALCPVIPK.D	15.4812	15.5886	15.541	15.3998	15.8133	14.8994	15.5369	0.0439205	15.3709	0.373658	-0.166084	0.566276
PP1A_MOUSE	Serine/threonine-protein phosphatase PP1-alpha catalytic subunit	PP1A_MOUSE_Cys105	K.QSLETICLLLAYK.I	16.6586	16.434	16.7224	16.5063	16.6878	16.1055	16.605	0.123688	16.4332	0.243271	-0.171827	0.423565
PP1A_MOUSE	Serine/threonine-protein phosphatase PP1-alpha catalytic subunit	PP1A_MOUSE_Cys140	R.IYGFYDECK.R	18.7954	18.5314	18.7142	18.7705	18.5344	18.5828	18.6803	0.110405	18.6292	0.101824	-0.0511551	0.655201
PP1A_MOUSE	Serine/threonine-protein phosphatase PP1-alpha catalytic subunit	PP1A_MOUSE_Cys155	K.TFTDCFNC#LPIAAIVDEK.I	17.2906	17.0161	17.5498	17.0287	17.2394	17.1922	17.2855	0.217934	17.1534	0.0902731	-0.132054	0.472842
PP2AA_MOUSE	Serine/threonine-protein phosphatase 2A catalytic subunit alpha isoform	PP2AA_MOUSE_Cys133	R.QITQVYGFYDECLR.K	20.1996	20.1651	20.1639	20.0431	20.0548	20.0292	20.1762	0.0165761	20.0423	0.0104641	-0.133885	0.000642702
PP2AA_MOUSE	Serine/threonine-protein phosphatase 2A catalytic subunit alpha isoform	PP2AA_MOUSE_Cys20	K.ELDQWIEQLNECK.Q	18.2321	18.1489	18.2121	18.1916	18.0108	18.048	18.1977	0.0354537	18.0835	0.077966	-0.114225	0.132351
PP2AA_MOUSE	Serine/threonine-protein phosphatase 2A catalytic subunit alpha isoform	PP2AA_MOUSE_Cys266	R.NVVTIFSAPNYCYR.C	21.3222	21.2635	21.2992	20.803	20.9803	20.855	21.295	0.0241623	20.8794	0.0744341	-0.415537	0.001683
PP4R1_MOUSE	Serine/threonine-protein phosphatase 4 regulatory subunit 1	PP4R1_MOUSE_Cys664	R.QNWHCLR.E	14.8433	14.9925	15.3337	14.9072	15.3148	14.7985	15.0565	0.205259	15.0069	0.22225	-0.0496598	0.827823
PPAL_MOUSE	Lysosomal acid phosphatase	PPAL_MOUSE_Cys159	R.LLKFPLGPCPR.Y	20.7651	20.4406	20.1863	20.1992	20.432	19.911	20.464	0.236881	20.1807	0.213106	-0.283267	0.277066
PPCE_MOUSE	Prolyl endopeptidase	PPCE_MOUSE_Cys255	R.YVLLSIWEGCDPVNR.L	16.0357	16.3532	16.5142	15.9874	15.9182	15.4332	16.301	0.198823	15.7796	0.246533	-0.521448	0.0803939
PPCE_MOUSE	Prolyl endopeptidase	PPCE_MOUSE_Cys57	K.ITVPFLEQCPIR.G	15.4213	15.4221	15.2678	15.2252	15.083	15.0933	15.3704	0.0725498	15.1338	0.0647256	-0.23654	0.0262785
PPGB_MOUSE	Lysosomal protective protein	PPGB_MOUSE_Cys241	K.CNFYDNK.D	20.0656	20.1652	19.8963	19.5515	19.67	19.5432	20.0424	0.111025	19.5882	0.05794	-0.454125	0.00684699
PPGB_MOUSE	Lysosomal protective protein	PPGB_MOUSE_Cys276	K.SGLNIYNLYAPCAGGVPGR.H	18.9095	19.2612	19.2613	18.3758	19.0511	18.2771	19.144	0.165835	18.568	0.343967	-0.576011	0.0998404
PPGB_MOUSE	Lysosomal protective protein	PPGB_MOUSE_Cys32	A.APDQDEIDCLPGLAK.Q	19.9813	20.1928	19.8892	19.4488	19.603	19.7339	20.0211	0.127109	19.5952	0.116527	-0.425835	0.0250688
PPGB_MOUSE	Lysosomal protective protein	PPGB_MOUSE_Cys356	R.WDMCNFLVNLQYR.R	21.513	21.2017	20.9553	21.0363	20.9641	20.829	21.2234	0.228182	20.9431	0.0859242	-0.280212	0.179431
PPGB_MOUSE	Lysosomal protective protein	PPGB_MOUSE_Cys438	K.ECSHITFLTIK.G	15.1135	15.3254	15.699	15.5028	15.3967	15.9616	15.3793	0.242031	15.6204	0.245175	0.241075	0.378389
PPIA_MOUSE	Peptidyl-prolyl cis-trans isomerase A	PPIA_MOUSE_Cys115	K.HTGPGILSM*ANAGPNTNGSQFFICTAK.T	18.6511	18.1321	19.0012	17.5913	17.5882	18.4241	18.5948	0.357032	17.8679	0.393342	-0.726947	0.125052
PPIA_MOUSE	Peptidyl-prolyl cis-trans isomerase A	PPIA_MOUSE_Cys62	R.IIPGFM*CQGGDFTR.H	23.085	22.9021	23.3298	22.8372	22.6576	22.9545	23.1056	0.175205	22.8165	0.122103	-0.289172	0.128012
PPID_MOUSE	Peptidyl-prolyl cis-trans isomerase D	PPID_MOUSE_Cys71	K.GCPFHR.I	16.3563	16.6916	16.4981	16.1618	16.3168	16.199	16.5153	0.137433	16.2259	0.0660628	-0.289443	0.0549763
PPIL1_MOUSE	Peptidyl-prolyl cis-trans isomerase-like 1	PPIL1_MOUSE_Cys133	R.VCQGIGMVNR.V	20.4642	20.257	20.506	20.1953	20.1295	20.0957	20.4091	0.108886	20.1402	0.041376	-0.268912	0.0309384
PPM1G_MOUSE	Protein phosphatase 1G	PPM1G_MOUSE_Cys164	R.YGQNCQK.V	20.5148	20.5523	20.4638	20.1292	20.3593	20.0937	20.5103	0.0362667	20.194	0.117725	-0.316255	0.0221451
PPME1_MOUSE	Protein phosphatase methylesterase 1	PPME1_MOUSE_Cys312	R.GLSNLFLSCPIPK.L	18.9244	18.7277	19.0184	18.8162	18.8249	18.7797	18.8902	0.121114	18.8069	0.0195539	-0.0832308	0.391672
PPP5_MOUSE	Serine/threonine-protein phosphatase 5	PPP5_MOUSE_Cys404	R.GVSCQFGPDVTK.A	19.9834	19.9982	19.9352	19.8445	19.8257	19.7961	19.9723	0.0269202	19.8221	0.0198864	-0.150182	0.00315866
PPP6_MOUSE	Serine/threonine-protein phosphatase 6 catalytic subunit	PPP6_MOUSE_Cys129	R.QITQVYGFYDECQTK.Y	13.1079	13.2637	13.4005	13.4783	13.2763	13.024	13.2574	0.119542	13.2595	0.185863	0.00216254	0.989621
PRC2C_MOUSE	Protein PRRC2C	PRC2C_MOUSE_Cys224	R.IACGPPQAK.L	20.4977	20.1986	20.3629	20.3137	20.1377	20.0675	20.3531	0.122312	20.173	0.103538	-0.180076	0.187223
PRDX1_MOUSE	Peroxiredoxin-1	PRDX1_MOUSE_Cys173	K.HGEVCPAGWKPGSDTIKPDVNK.S	21.9851	20.132	21.0166	21.3227	21.1269	19.3776	21.0446	0.75678	20.6091	0.874465	-0.435546	0.62251
PRDX1_MOUSE	Peroxiredoxin-1	PRDX1_MOUSE_Cys52	K.GKYVVFFFYPLDFTFVCPTEIIAFSDR.A	14.3448	13.9719	14.5457	15.3718	14.0983	14.727	14.2875	0.237712	14.7324	0.519937	0.444913	0.332859
PRDX4_MOUSE	Peroxiredoxin-4	PRDX4_MOUSE_Cys54	R.ENECHFYAGGQVYPGEASR.V	16.1366	16.1204	16.0911	15.837	16.0687	15.8372	16.116	0.0188476	15.9143	0.109208	-0.201727	0.0617009
PRDX6_MOUSE	Peroxiredoxin-6	PRDX6_MOUSE_Cys47	R.DFTPVCTTELGR.A	20.9544	20.9901	20.712	20.5755	20.6767	20.6185	20.8855	0.123548	20.6236	0.0414664	-0.261894	0.0467728
PREX1_MOUSE	Phosphatidylinositol 3,4,5-trisphosphate-dependent Rac exchanger 1 protein	PREX1_MOUSE_Cys32	R.GPVSGPCAAAR.D	16.6709	16.6192	16.7298	16.5305	16.6693	16.6041	16.6733	0.0451783	16.6013	0.0566875	-0.0719979	0.232819
PROF1_MOUSE	Profilin-1	PROF1_MOUSE_Cys128	K.CYEMASHLR.R	21.5011	21.2151	21.6563	21.1818	21.2574	21.13	21.4575	0.182744	21.1898	0.0523234	-0.267763	0.117169
PROP_MOUSE	Properdin	PROP_MOUSE_Cys159	R.VCDNPAPK.C	17.358	17.515	17.1374	16.8316	16.709	16.6532	17.3368	0.154895	16.7313	0.0745142	-0.605536	0.0075859
PROP_MOUSE	Properdin	PROP_MOUSE_Cys292	R.HGGPFCAGDATR.N	14.7485	14.1822	14.8791	14.6653	14.6491	14.836	14.6033	0.302459	14.7168	0.0845492	0.11356	0.636024
PROP_MOUSE	Properdin	PROP_MOUSE_Cys302	R.NQMCNK.A	20.3058	20.0821	19.8383	18.9211	19.0469	19.0583	20.0754	0.190919	19.0088	0.0621538	-1.06664	0.0016799
PROP_MOUSE	Properdin	PROP_MOUSE_Cys332	R.MSINCEGTPGQQSR.S	17.6164	17.3495	17.1995	16.6997	16.5778	16.6425	17.3885	0.172429	16.64	0.0497846	-0.748467	0.00413452
PROS_MOUSE	Vitamin K-dependent protein S	PROS_MOUSE_Cys88	K.YLGCLGAFR.V	19.238	19.157	19.1519	18.9644	19.0082	18.8168	19.1823	0.0394258	18.9298	0.0818967	-0.252496	0.0171227
PRP6_MOUSE	Pre-mRNA-processing factor 6	PRP6_MOUSE_Cys604	R.AVAHCPK.A	15.219	15.201	15.5427	15.7769	15.5285	15.424	15.3209	0.156996	15.5765	0.148021	0.255555	0.169254
PRPS1_MOUSE	Ribose-phosphate pyrophosphokinase 1	PRPS1_MOUSE_Cys91	R.VTAVIPCFPYAR.Q	19.9259	19.6732	20.0017	19.8529	20.0954	19.6931	19.8669	0.140436	19.8805	0.165412	0.0135401	0.933921
PRPS2_MOUSE	Ribose-phosphate pyrophosphokinase 2	PRPS2_MOUSE_Cys165	R.NCIIVSPDAGGAK.R	18.1954	18.3975	18.2522	17.904	17.9356	17.9592	18.2817	0.0851329	17.9329	0.0226282	-0.348772	0.00499432
PRS4_MOUSE	26S protease regulatory subunit 4	PRS4_MOUSE_Cys399	K.AICTEAGLMALR.E	20.5399	20.5569	20.4604	20.4951	20.4991	20.4029	20.5191	0.0420719	20.4657	0.0444529	-0.0533657	0.285061
PRS6A_MOUSE	26S protease regulatory subunit 6A	PRS6A_MOUSE_Cys243	R.ACAAQTK.A	13.7408	13.7921	13.9165	13.736	13.6751	13.7677	13.8165	0.0737857	13.7262	0.0384196	-0.0902195	0.199876
PRS6B_MOUSE	26S protease regulatory subunit 6B	PRS6B_MOUSE_Cys210	R.GVLMYGPPGCGK.T	19.7417	19.572	19.7963	19.7882	19.789	19.5923	19.7033	0.0954998	19.7232	0.0925275	0.0198304	0.84327
PRS7_MOUSE	26S protease regulatory subunit 7	PRS7_MOUSE_Cys389	R.SVCTEAGMFAIR.A	19.0148	18.9697	19.1181	18.937	18.9203	18.9338	19.0342	0.0621237	18.9304	0.00720438	-0.10383	0.0786956
PRS8_MOUSE	26S protease regulatory subunit 8	PRS8_MOUSE_Cys363	K.GVCTEAGMYALR.E	19.4673	19.3825	19.2901	19.2984	19.3806	19.2225	19.38	0.072332	19.3005	0.0645706	-0.0794752	0.310865
PSA_MOUSE	Puromycin-sensitive aminopeptidase	PSA_MOUSE_Cys266	R.SKDGVCVR.V	17.4847	17.3412	17.5461	17.2353	17.266	17.2588	17.4573	0.085875	17.2534	0.0131088	-0.203913	0.0293885
PSA_MOUSE	Puromycin-sensitive aminopeptidase	PSA_MOUSE_Cys67	R.LPAEVSPINYSLCLKPDLLDFTFEGK.L	15.4662	15.1446	14.8996	15.029	14.9326	14.8861	15.1701	0.232017	14.9492	0.0595025	-0.220917	0.262106
PSA1_MOUSE	Proteasome subunit alpha type-1	PSA1_MOUSE_Cys85	R.LLCNFMR.Q	18.9736	18.828	18.9887	18.661	18.609	18.642	18.9301	0.0724762	18.6374	0.0215101	-0.292739	0.00541261
PSA3_MOUSE	Proteasome subunit alpha type-3	PSA3_MOUSE_Cys42	R.CKDGVVFGVEK.L	19.405	19.2926	19.4388	19.1161	19.2363	19.105	19.3788	0.0625109	19.1525	0.0594527	-0.226293	0.0206601
PSA4_MOUSE	Proteasome subunit alpha type-4	PSA4_MOUSE_Cys163	K.ATCIGNNSAAAVSM*LK.Q	13.9036	14.3532	14.5729	14.1356	14.0281	14.2235	14.2766	0.278554	14.1291	0.0799291	-0.147488	0.511491
PSA4_MOUSE	Proteasome subunit alpha type-4	PSA4_MOUSE_Cys74	K.LNEDMACSVAGITSDANVLTNELR.L	17.1415	17.3907	17.6405	17.4112	17.3733	17.2174	17.3909	0.203736	17.334	0.0838428	-0.0569141	0.733358
PSA5_MOUSE	Proteasome subunit alpha type-5	PSA5_MOUSE_Cys165	K.GPQLFHMDPSGTFVQCDAR.A	13.7026	12.7778	12.9326	13.3021	12.9001	13.4236	13.1376	0.404436	13.2086	0.223694	0.0709573	0.838738
PSA6_MOUSE	Proteasome subunit alpha type-6	PSA6_MOUSE_Cys47	R.GKDCAVIVTQK.K	21.6998	21.9092	21.9181	21.8222	21.6755	21.6479	21.8424	0.100868	21.7152	0.0764891	-0.127171	0.228438
PSB2_MOUSE	Proteasome subunit beta type-2	PSB2_MOUSE_Cys91	R.RNLADCLR.S	16.7414	16.9428	17.1773	16.8118	16.7392	16.6617	16.9538	0.178119	16.7376	0.0612645	-0.216251	0.17978
PSB6_MOUSE	Proteasome subunit beta type-6	PSB6_MOUSE_Cys185	R.EGMTKDECLQFTANALALAMER.D	17.7119	17.7552	17.8782	17.7079	17.8012	17.6545	17.7818	0.0704513	17.7212	0.0606233	-0.0606048	0.408638
PSD11_MOUSE	26S proteasome non-ATPase regulatory subunit 11	PSD11_MOUSE_Cys202	R.TTANAIYCPPK.L	18.864	19.0302	19.01	18.7956	18.9015	18.6703	18.9681	0.0740299	18.7891	0.0944947	-0.178951	0.102693
PSD11_MOUSE	26S proteasome non-ATPase regulatory subunit 11	PSD11_MOUSE_Cys289	K.CVAQASK.N	20.1148	20.0322	20.3466	20.1069	20.1139	20.0131	20.1645	0.133062	20.078	0.0459855	-0.0865686	0.433586
PSD13_MOUSE	26S proteasome non-ATPase regulatory subunit 13	PSD13_MOUSE_Cys182	R.FLGCVDIK.D	21.6089	21.5401	21.7573	21.5789	21.6765	21.5182	21.6354	0.09065	21.5912	0.0652191	-0.044254	0.605092
PSD13_MOUSE	26S proteasome non-ATPase regulatory subunit 13	PSD13_MOUSE_Cys357	R.LELWCTDVK.S	20.2968	20.4624	20.5231	20.333	20.3275	20.1592	20.4274	0.0956243	20.2732	0.0806763	-0.154196	0.156292
PSMD1_MOUSE	26S proteasome non-ATPase regulatory subunit 1	PSMD1_MOUSE_Cys141	R.CLDDHKYK.Q	17.8244	17.8197	17.8793	17.7996	17.8125	17.7876	17.8411	0.0270501	17.7999	0.0101993	-0.0412235	0.113935
PSMD1_MOUSE	26S proteasome non-ATPase regulatory subunit 1	PSMD1_MOUSE_Cys806	K.SNCKPSTFAYPAPLEVPKEK.E	17.6669	17.192	18.0269	17.7493	17.7128	17.0547	17.6286	0.34192	17.5056	0.319177	-0.123002	0.728834
PSMD2_MOUSE	26S proteasome non-ATPase regulatory subunit 2	PSMD2_MOUSE_Cys251	R.CALGVFR.K	20.235	20.2451	20.4073	19.8787	20.0347	19.9711	20.2958	0.0789323	19.9615	0.0640698	-0.334313	0.00965725
PSMD2_MOUSE	26S proteasome non-ATPase regulatory subunit 2	PSMD2_MOUSE_Cys448	K.SGALLACGIVNSGVR.N	19.2883	19.1217	19.6143	19.112	19.2045	19.2546	19.3414	0.204586	19.1903	0.0590699	-0.15107	0.372486
PSMD8_MOUSE	26S proteasome non-ATPase regulatory subunit 8	PSMD8_MOUSE_Cys115	K.CGEELGR.L	16.8404	16.7713	16.8077	16.5778	16.6179	16.5105	16.8065	0.0282014	16.5687	0.0443406	-0.237741	0.00306426
PSMD8_MOUSE	26S proteasome non-ATPase regulatory subunit 8	PSMD8_MOUSE_Cys161	R.DILEIGAQWSILCK.D	16.2928	16.2471	16.4797	16.1042	16.1352	16.2337	16.3399	0.100603	16.1577	0.0552114	-0.182191	0.08811
PSME1_MOUSE	Proteasome activator complex subunit 1	PSME1_MOUSE_Cys22	K.VDVFREDLCSK.T	18.8167	18.6971	18.8496	18.9526	19.0008	18.7451	18.7878	0.0655506	18.8995	0.110921	0.11171	0.287385
PSME2_MOUSE	Proteasome activator complex subunit 2	PSME2_MOUSE_Cys33	R.QNLFQEADDFLCTFLPR.K	16.1609	16.193	16.4565	16.2823	16.4027	16.2116	16.2702	0.132406	16.2989	0.0788891	0.0287178	0.805179
PSME2_MOUSE	Proteasome activator complex subunit 2	PSME2_MOUSE_Cys91	K.CGYLPGNEK.L	19.5265	19.5653	19.7634	19.2499	19.339	19.155	19.6184	0.103749	19.248	0.0751282	-0.370379	0.0149857
PTBP1_MOUSE	Polypyrimidine tract-binding protein 1	PTBP1_MOUSE_Cys249	K.LSLDGQNIYNACCTLR.I	19.057	19.0169	19.0409	19.7868	19.3749	19.6628	19.0383	0.0164691	19.6082	0.172547	0.569873	0.00966432
PTBP1_MOUSE	Polypyrimidine tract-binding protein 1	PTBP1_MOUSE_Cys250	K.LSLDGQNIYNAC#CTLR.I	19.5664	19.4713	19.6607	20.1931	19.9526	20.0918	19.5661	0.0773026	20.0792	0.0986169	0.513067	0.00442064
PTN11_MOUSE	Tyrosine-protein phosphatase non-receptor type 11	PTN11_MOUSE_Cys318	K.CNNSKPK.K	14.9282	14.8259	14.897	14.3554	14.5816	14.4057	14.8837	0.0428118	14.4476	0.0969721	-0.43614	0.00434336
PTN22_MOUSE	Tyrosine-protein phosphatase non-receptor type 22	PTN22_MOUSE_Cys758	K.SVCNSSSPSKPTER.V	13.5953	13.4396	13.4699	13.3957	13.4035	13.4846	13.5016	0.0674122	13.4279	0.0402002	-0.0736616	0.255117
PTN6_MOUSE	Tyrosine-protein phosphatase non-receptor type 6	PTN6_MOUSE_Cys102	K.YPLNCSDPTSER.W	16.3573	16.4997	16.5261	16.2427	16.4054	16.2898	16.461	0.0741558	16.3127	0.0683536	-0.148351	0.105991
PTPRC_MOUSE	Receptor-type tyrosine-protein phosphatase C	PTPRC_MOUSE_Cys382	K.NVINVQTDLGIPETPKPSCGDPAAR.K	20.8592	20.5412	20.51	20.1022	20.4117	19.8947	20.6368	0.157797	20.1362	0.212417	-0.500598	0.0554929
PTPRC_MOUSE	Receptor-type tyrosine-protein phosphatase C	PTPRC_MOUSE_Cys463	K.CNFHTK.A	22.2081	22.1604	21.7565	21.3606	21.6427	21.3297	22.0417	0.202574	21.4443	0.140852	-0.597335	0.0266864
PUR2_MOUSE	Trifunctional purine biosynthetic protein adenosine-3	PUR2_MOUSE_Cys134	R.AFTNPEDACSFITSANFPALVVK.A	17.9509	18.0463	18.0157	18.0645	18.1132	18.0357	18.0043	0.0397762	18.0712	0.0319895	0.0668857	0.13749
PUR2_MOUSE	Trifunctional purine biosynthetic protein adenosine-3	PUR2_MOUSE_Cys41	K.QVLVAPGNAGTACAGK.I	17.5083	17.4265	18.2161	17.1754	18.196	17.164	17.717	0.354518	17.5118	0.483817	-0.205219	0.653777
PUR2_MOUSE	Trifunctional purine biosynthetic protein adenosine-3	PUR2_MOUSE_Cys93	R.CFGPTAQAAQLESSKK.F	18.4757	18.2956	18.3739	17.7904	18.0991	17.9738	18.3817	0.0737419	17.9544	0.126784	-0.427313	0.0146099
PUR4_MOUSE	Phosphoribosylformylglycinamidine synthase	PUR4_MOUSE_Cys270	K.FCDNSSAIQGK.K	19.1199	19.171	19.168	18.9716	18.8512	18.8872	19.153	0.0233967	18.9034	0.0504643	-0.249608	0.00315816
PUR6_MOUSE	Multifunctional protein ADE2	PUR6_MOUSE_Cys63	K.ITSCIFQLLQEAGIK.T	16.6238	15.9222	16.135	15.8489	16.0698	15.8109	16.227	0.29373	15.9099	0.114174	-0.317139	0.227771
PUR9_MOUSE	Bifunctional purine biosynthesis protein PURH	PUR9_MOUSE_Cys101	R.VVVCNLYPFVK.T	17.8236	17.8133	18.008	17.6886	17.6704	17.8505	17.8816	0.0894755	17.7365	0.0809593	-0.145151	0.164128
PUR9_MOUSE	Bifunctional purine biosynthesis protein PURH	PUR9_MOUSE_Cys287	R.VCMVYDLYPTLTPLAVAYAR.A	17.9321	18.0489	18.2466	18.0645	17.8329	17.8702	18.0759	0.129786	17.9225	0.101561	-0.153333	0.258582
PUR9_MOUSE	Bifunctional purine biosynthesis protein PURH	PUR9_MOUSE_Cys434	K.YTQSNSVCYAK.D	20.9293	21.0807	20.9839	20.4882	20.5702	20.6594	20.998	0.0626177	20.5726	0.069949	-0.42538	0.00304716
PURA2_MOUSE	Adenylosuccinate synthetase isozyme 2	PURA2_MOUSE_Cys58	K.VVDLLAQDADIVCR.C	16.1524	16.3765	16.5579	16.5866	16.4477	16.157	16.3622	0.165854	16.3971	0.178986	0.0348589	0.849754
QCR1_MOUSE	Cytochrome b-c1 complex subunit 1, mitochondrial	QCR1_MOUSE_Cys410	R.NALVSHLDGTTPVCEDIGR.S	13.4387	14.0426	14.3742	13.4063	14.096	13.961	13.9518	0.387266	13.8211	0.298429	-0.130699	0.724596
QCR6_MOUSE	Cytochrome b-c1 complex subunit 6, mitochondrial	QCR6_MOUSE_Cys35	R.EHCEQLEK.C	18.7552	18.6516	18.5688	18.5805	18.5178	18.4282	18.6585	0.0762363	18.5088	0.0624899	-0.149683	0.0982632
RAB21_MOUSE	Ras-related protein Rab-21	RAB21_MOUSE_Cys175	K.GIEELFLDLCKR.M	18.418	18.21	18.9398	18.6426	18.5673	18.4992	18.5226	0.307002	18.5697	0.0585597	0.0471043	0.841637
RAB31_MOUSE	Ras-related protein Rab-31	RAB31_MOUSE_Cys9	K.VCLLGDTGVGK.S	19.4247	19.4421	19.6731	19.2388	19.3215	19.17	19.5133	0.113204	19.2434	0.0619404	-0.269868	0.0416542
RAB7A_MOUSE	Ras-related protein Rab-7a	RAB7A_MOUSE_Cys84	R.GADC#CVLVFDVTAPNTFK.T	18.1153	17.747	18.3328	17.8766	17.8904	17.6031	18.065	0.241774	17.79	0.132327	-0.274982	0.23109
RAC1_MOUSE	Ras-related C3 botulinum toxin substrate 1	RAC1_MOUSE_Cys105	R.HHCPNTPIILVGTK.L	20.6002	20.4512	20.5417	20.3255	20.3061	20.1951	20.531	0.0612931	20.2756	0.0574772	-0.255449	0.0126523
RAC1_MOUSE	Ras-related C3 botulinum toxin substrate 1	RAC1_MOUSE_Cys157	K.YLECSALTQR.G	15.3245	15.97	15.9218	15.3419	15.5988	15.8529	15.7388	0.29358	15.5979	0.208647	-0.140901	0.609558
RAC2_MOUSE	Ras-related C3 botulinum toxin substrate 2	RAC2_MOUSE_Cys178	R.AVLCPQPTR.Q	21.7227	21.9313	22.2654	21.8874	21.7331	21.6884	21.9731	0.223503	21.7696	0.0852443	-0.203535	0.2952
RAD50_MOUSE	DNA repair protein RAD50	RAD50_MOUSE_Cys102	R.SMLCSQK.N	19.0387	18.8832	19.1252	19.6254	19.6521	19.6024	19.0157	0.100103	19.6266	0.0202903	0.610924	0.00107027
RAE1L_MOUSE	mRNA export factor	RAE1L_MOUSE_Cys106	K.VFTASCDK.T	20.195	20.0626	20.1229	19.6727	20.0515	19.782	20.1268	0.0541482	19.8354	0.159195	-0.291396	0.0703894
RAGP1_MOUSE	Ran GTPase-activating protein 1	RAGP1_MOUSE_Cys152	K.LNNCGMGIGGGK.I	19.4005	19.2792	19.5888	19.16	19.2573	19.2502	19.4228	0.127376	19.2225	0.0443141	-0.200286	0.103625
RAGP1_MOUSE	Ran GTPase-activating protein 1	RAGP1_MOUSE_Cys169	K.ILAAALTECHR.K	17.3932	17.4685	17.0197	17.0816	16.9769	16.8097	17.2938	0.196249	16.9561	0.111988	-0.33774	0.102044
RAN_MOUSE	GTP-binding nuclear protein Ran	RAN_MOUSE_Cys120	R.VC#ENIPIVLCGNKVDIK.D	20.1765	20.1382	20.5906	20.0628	20.1016	19.8922	20.3017	0.204832	20.0189	0.0909716	-0.282834	0.148873
RANG_MOUSE	Ran-specific GTPase-activating protein	RANG_MOUSE_Cys158	K.TKFEECR.K	18.9325	18.9568	19.1141	18.6365	18.5629	18.5555	19.0011	0.0804891	18.585	0.0365394	-0.416136	0.00264364
RANG_MOUSE	Ran-specific GTPase-activating protein	RANG_MOUSE_Cys99	K.ICANHYITPMMELKPNAGSDR.A	17.5895	17.5558	17.8408	17.5892	17.0622	17.2375	17.6621	0.127142	17.2963	0.219142	-0.36575	0.110742
RANT_MOUSE	GTP-binding nuclear protein Ran, testis-specific isoform	RANT_MOUSE_Cys112	R.VCENIPIVLCGNK.V	22.3943	22.6205	22.652	22.3789	22.3262	22.3879	22.5556	0.114762	22.3643	0.0272122	-0.191237	0.0835769
RANT_MOUSE	GTP-binding nuclear protein Ran, testis-specific isoform	RANT_MOUSE_Cys120	R.VC#ENIPIVLCGNK.V	23.5324	23.4945	23.6815	23.2359	23.3351	23.312	23.5694	0.0807026	23.2943	0.0423599	-0.275117	0.0129627
RAP1B_MOUSE	Ras-related protein Rap-1b	RAP1B_MOUSE_Cys118	R.VKDTDDVPMILVGNKCDLEDER.V	17.2892	16.9895	17.5504	17.5851	17.3501	17.1393	17.2764	0.229184	17.3582	0.182102	0.0817835	0.712921
RAP1B_MOUSE	Ras-related protein Rap-1b	RAP1B_MOUSE_Cys141	R.QWNNCAFLESSAK.S	18.9291	18.8973	19.2033	18.9585	18.7435	18.7586	19.0099	0.137396	18.8202	0.0980044	-0.189725	0.187077
RASA3_MOUSE	Ras GTPase-activating protein 3	RASA3_MOUSE_Cys678	K.VSQCNQK.R	15.6096	15.5958	15.9951	15.596	15.6161	15.7362	15.7335	0.185061	15.6495	0.0618976	-0.0840322	0.575414
RBMS1_MOUSE	RNA-binding motif, single-stranded-interacting protein 1	RBMS1_MOUSE_Cys221	K.TPPGVSAPTEPLLCK.F	18.0932	17.8949	18.2525	17.8526	17.9089	17.9912	18.0802	0.146259	17.9176	0.0568989	-0.162601	0.21672
RBP2_MOUSE	E3 SUMO-protein ligase RanBP2	RBP2_MOUSE_Cys1366	K.KCVSCQNTNPTSNK.E	14.4857	14.3267	14.5131	14.3463	14.3803	14.3702	14.4418	0.0821851	14.3656	0.014265	-0.0762228	0.265857
RBP2_MOUSE	E3 SUMO-protein ligase RanBP2	RBP2_MOUSE_Cys1369	K.KCVSCQNTNPTSNK.E	14.4857	14.3267	14.5131	14.3463	14.3803	14.3702	14.4418	0.0821851	14.3656	0.014265	-0.0762228	0.265857
RBP2_MOUSE	E3 SUMO-protein ligase RanBP2	RBP2_MOUSE_Cys2811	K.VCANHVITK.A	18.6775	18.6296	19.013	18.677	18.9028	18.6602	18.7734	0.170566	18.7467	0.110616	-0.0267183	0.861595
RCC2_MOUSE	Protein RCC2	RCC2_MOUSE_Cys207	R.LIEALSHEAIVLAACGR.N	15.814	15.7373	16.1462	15.9325	15.7521	15.7116	15.8992	0.177465	15.7988	0.0959929	-0.100405	0.520389
RCC2_MOUSE	Protein RCC2	RCC2_MOUSE_Cys335	R.DVACGANHTLVLDSQKR.V	16.2373	15.696	16.5512	15.4988	15.2179	16.87	16.1615	0.353228	15.8622	0.721779	-0.299255	0.626284
RCC2_MOUSE	Protein RCC2	RCC2_MOUSE_Cys426	K.AVQDLCGWR.I	21.6683	21.557	21.5226	21.6148	21.6728	21.4934	21.5826	0.0621649	21.5937	0.0747525	0.0110239	0.880374
RENBP_MOUSE	N-acylglucosamine 2-epimerase	RENBP_MOUSE_Cys391	K.GCFHVPR.C	16.2621	16.4458	16.2861	16.013	15.9608	16.1653	16.3313	0.0815444	16.0464	0.0867732	-0.284966	0.0276724
RENT1_MOUSE	Regulator of nonsense transcripts 1	RENT1_MOUSE_Cys208	R.QPCASQSSLK.D	16.553	16.5979	16.5701	16.3604	16.3496	16.2834	16.5737	0.0185084	16.3311	0.0340246	-0.242548	0.00089779
RENT1_MOUSE	Regulator of nonsense transcripts 1	RENT1_MOUSE_Cys526	R.QGNGPVLVCAPSNIAVDQLTEK.I	16.9835	17.5119	17.2543	17.1228	16.8683	17.1068	17.2499	0.215722	17.0326	0.116409	-0.217231	0.278364
RENT1_MOUSE	Regulator of nonsense transcripts 1	RENT1_MOUSE_Cys678	K.QLILVGDHC#QLGPVVMCK.K	15.9183	16.423	16.3693	16.1354	16.504	16.0008	16.2369	0.22634	16.2134	0.212697	-0.023458	0.920082
RFC5_MOUSE	Replication factor C subunit 5	RFC5_MOUSE_Cys72	K.TSTILACAK.Q	20.5279	20.552	20.452	20.4268	20.4662	20.3662	20.5106	0.0426313	20.4198	0.0411377	-0.0908688	0.0958998
RHG01_MOUSE	Rho GTPase-activating protein 1	RHG01_MOUSE_Cys91	K.IIVFSACR.M	19.5742	19.4645	19.5125	19.2528	19.2771	19.246	19.5171	0.044901	19.2586	0.0133434	-0.25842	0.0014561
RHG30_MOUSE	Rho GTPase-activating protein 30	RHG30_MOUSE_Cys968	K.IHVAPASPCPRPGR.L	15.1879	15.1699	15.0973	14.9312	15.143	14.8949	15.1517	0.0391333	14.9897	0.109403	-0.161961	0.119991
RHOA_MOUSE	Transforming protein RhoA	RHOA_MOUSE_Cys159	R.IGAFGYMECSAK.T	22.6329	22.6868	23.1165	22.6728	22.5527	22.5123	22.8121	0.216411	22.5792	0.0681921	-0.232825	0.220367
RHOA_MOUSE	Transforming protein RhoA	RHOA_MOUSE_Cys16	K.KLVIVGDGACGK.T	16.8696	16.907	17.0619	16.9248	17.0543	17.306	16.9462	0.0832734	17.095	0.15828	0.148857	0.304431
RINI_MOUSE	Ribonuclease inhibitor	RINI_MOUSE_Cys137	K.LLC#EGLQDPQCR.L	19.4279	19.3696	19.2308	19.1521	18.987	19.0171	19.3428	0.0826725	19.0521	0.0717625	-0.290712	0.0198525
RINI_MOUSE	Ribonuclease inhibitor	RINI_MOUSE_Cys147	K.LQLEYCNLTATSC#EPLASVLR.V	16.1959	16.0507	16.2151	15.5598	15.7281	15.4736	16.1539	0.0733884	15.5872	0.105652	-0.566737	0.00338012
RINI_MOUSE	Ribonuclease inhibitor	RINI_MOUSE_Cys154	K.LQLEYC#NLTATSCEPLASVLR.V	18.4994	18.0444	18.4904	18.398	18.1012	18.3079	18.3447	0.212413	18.269	0.124271	-0.075658	0.686151
RINI_MOUSE	Ribonuclease inhibitor	RINI_MOUSE_Cys194	K.DSACQLESLK.L	19.7949	19.8186	19.6215	19.3679	19.3771	19.4964	19.745	0.0878267	19.4138	0.058516	-0.331171	0.011353
RINI_MOUSE	Ribonuclease inhibitor	RINI_MOUSE_Cys204	K.LENCGITAANC#K.D	19.1274	19.0853	18.9722	18.6387	18.676	18.8002	19.0616	0.0655472	18.705	0.0690435	-0.356634	0.00609644
RINI_MOUSE	Ribonuclease inhibitor	RINI_MOUSE_Cys215	K.DLCDVVASK.A	20.1548	20.268	20.0248	19.9388	19.8476	19.8774	20.1492	0.0993893	19.888	0.0379707	-0.261243	0.0255267
RINI_MOUSE	Ribonuclease inhibitor	RINI_MOUSE_Cys243	K.LGNAGIAALCPGLLLPSC#K.L	13.9649	14.2445	14.1695	13.6052	13.6011	13.2149	14.1263	0.118159	13.4737	0.183046	-0.652563	0.0133076
RINI_MOUSE	Ribonuclease inhibitor	RINI_MOUSE_Cys251	K.LGNAGIAALC#PGLLLPSCK.L	17.3657	17.1789	17.5487	17.2367	17.4613	17.3445	17.3644	0.150978	17.3475	0.0917115	-0.0169552	0.898585
RINI_MOUSE	Ribonuclease inhibitor	RINI_MOUSE_Cys308	R.LLC#ESLLEPGCQLESLWIK.T	18.3286	18.4116	18.0034	18.1591	18.1967	18.1475	18.2479	0.176178	18.1677	0.0209996	-0.080127	0.557771
RINI_MOUSE	Ribonuclease inhibitor	RINI_MOUSE_Cys33	R.LDDCGLTEVR.C	20.0722	20.1068	20.0459	20.0597	19.9142	19.9223	20.075	0.0249604	19.9654	0.0667658	-0.109539	0.0954562
RINI_MOUSE	Ribonuclease inhibitor	RINI_MOUSE_Cys382	R.ELWLGDC#DVTNSGCSSLANVLLANR.S	17.7355	17.8696	17.9736	17.8907	18.1664	17.9102	17.8596	0.0974742	17.9891	0.125619	0.129482	0.313612
RINI_MOUSE	Ribonuclease inhibitor	RINI_MOUSE_Cys40	R.CKDISSAVQANPALTELSLR.T	20.3059	20.1474	20.0601	19.6329	19.7663	19.7739	20.1711	0.101741	19.7243	0.0647565	-0.446753	0.00634556
RINI_MOUSE	Ribonuclease inhibitor	RINI_MOUSE_Cys404	R.ELDLSNNCMGGPGVLQLLESLK.Q	20.0603	19.6771	19.9388	20.219	20.1201	19.9626	19.8921	0.1599	20.1006	0.105591	0.20849	0.198698
RINI_MOUSE	Ribonuclease inhibitor	RINI_MOUSE_Cys80	R.TNELGDGGVGLVLQGLQNPTCK.I	18.6165	18.3853	18.288	18.3467	18.5299	18.3746	18.43	0.137754	18.4171	0.0805819	-0.0128905	0.914561
RINI_MOUSE	Ribonuclease inhibitor	RINI_MOUSE_Cys90	K.LSLQNCGLTEAGCGILPGMLR.S	18.3658	18.4425	18.5959	18.4675	18.3499	18.2932	18.4681	0.095649	18.3702	0.0725604	-0.0978811	0.313126
RINI_MOUSE	Ribonuclease inhibitor	RINI_MOUSE_Cys97	K.LSLQNC#GLTEAGCGILPGMLR.S	18.3658	18.4425	18.5959	18.4675	18.3499	18.2932	18.4681	0.095649	18.3702	0.0725604	-0.0978811	0.313126
RIPK3_MOUSE	Receptor-interacting serine/threonine-protein kinase 3	RIPK3_MOUSE_Cys334	R.GTEMDCPR.E	16.4493	16.2192	16.2073	15.9721	16.068	15.8238	16.2919	0.111399	15.9546	0.100463	-0.337303	0.0335368
RIPK3_MOUSE	Receptor-interacting serine/threonine-protein kinase 3	RIPK3_MOUSE_Cys360	R.LHLEEPSGPVPGKCPER.Q	15.2285	15.5071	15.0057	15.1851	15.1799	15.3646	15.2471	0.205129	15.2432	0.0858905	-0.00388065	0.981494
RIR2_MOUSE	Ribonucleoside-diphosphate reductase subunit M2	RIR2_MOUSE_Cys203	R.EYLFNAIETMPCVK.K	18.0082	18.0006	18.0915	17.7919	17.6096	17.5814	18.0334	0.0411603	17.661	0.0932838	-0.372459	0.0066701
RL11_MOUSE	60S ribosomal protein L11	RL11_MOUSE_Cys21	K.LCLNICVGESGDR.L	19.9268	19.8855	20.043	20.1294	19.9815	19.9478	19.9518	0.0666708	20.0196	0.0788513	0.0677974	0.405689
RL11_MOUSE	60S ribosomal protein L11	RL11_MOUSE_Cys25	K.LCLNICVGESGDR.L	19.9268	19.8855	20.043	20.1294	19.9815	19.9478	19.9518	0.0666708	20.0196	0.0788513	0.0677974	0.405689
RL12_MOUSE	60S ribosomal protein L12	RL12_MOUSE_Cys141	K.EILGTAQSVGCNVDGR.H	19.9065	19.9852	19.7904	19.9437	19.7869	19.6472	19.894	0.0800131	19.7926	0.121093	-0.101389	0.379122
RL12_MOUSE	60S ribosomal protein L12	RL12_MOUSE_Cys162	R.HPHDIIDDINSGAVECPAS.-	18.1543	18.2977	17.7699	17.8785	18.0133	17.9244	18.074	0.222845	17.9387	0.0559424	-0.135221	0.45204
RL12_MOUSE	60S ribosomal protein L12	RL12_MOUSE_Cys17	R.CTGGEVGATSALAPK.I	17.1313	17.2872	17.4165	17.105	17.0122	16.9972	17.2783	0.116596	17.0381	0.047637	-0.240163	0.0542856
RL14_MOUSE	60S ribosomal protein L14	RL14_MOUSE_Cys42	R.ALVDGPCTR.V	19.4507	19.6867	19.5467	19.6382	19.7036	19.6847	19.5614	0.0969241	19.6755	0.0274804	0.114125	0.184404
RL18A_MOUSE	60S ribosomal protein L18a	RL18A_MOUSE_Cys22	K.CHTPPLYR.M	20.2669	20.4419	20.0358	19.9211	19.9115	19.891	20.2482	0.166315	19.9079	0.0125809	-0.340347	0.0447512
RL23_MOUSE	60S ribosomal protein L23	RL23_MOUSE_Cys28	R.ISLGLPVGAVINCADNTGAK.N	19.9188	19.3779	20.0131	19.9515	19.7527	19.4887	19.77	0.279895	19.7309	0.189558	-0.0390025	0.878298
RL24_MOUSE	60S ribosomal protein L24	RL24_MOUSE_Cys6	K.VELCSFSGYK.I	20.5593	20.6541	20.5889	20.7511	20.6611	20.7291	20.6008	0.0395773	20.7138	0.0382756	0.113016	0.0439897
RL27A_MOUSE	60S ribosomal protein L27a	RL27A_MOUSE_Cys70	R.NQSFCPTVNLDK.L	18.4381	18.5942	18.463	18.5582	18.5562	18.5992	18.4984	0.0684913	18.5712	0.0198067	0.0728051	0.222204
RL3_MOUSE	60S ribosomal protein L3	RL3_MOUSE_Cys253	K.VACIGAWHPAR.V	18.2937	18.4158	18.0873	19.3924	19.147	19.0682	18.2656	0.135599	19.2025	0.138052	0.936892	0.00238104
RL3_MOUSE	60S ribosomal protein L3	RL3_MOUSE_Cys336	K.GCVVGTK.K	23.664	23.8753	24.1413	24.2216	24.1356	24.1814	23.8935	0.195272	24.1795	0.0351271	0.285997	0.111127
RL30_MOUSE	60S ribosomal protein L30	RL30_MOUSE_Cys52	K.LVILANNCPALR.K	17.5479	17.3792	17.454	17.4445	17.3864	16.8903	17.4604	0.069004	17.2404	0.248722	-0.219968	0.294548
RL32_MOUSE	60S ribosomal protein L32	RL32_MOUSE_Cys96	K.SYCAEIAHNVSSK.N	18.8998	18.9769	19.079	19.3496	19.0139	19.1271	18.9852	0.0734118	19.1635	0.139469	0.178326	0.184828
RL34_MOUSE	60S ribosomal protein L34	RL34_MOUSE_Cys46	K.SACGVCPGR.L	20.2096	20.4672	20.5146	20.6419	20.5495	20.5347	20.3971	0.13402	20.5754	0.0474241	0.178286	0.150812
RL34_MOUSE	60S ribosomal protein L34	RL34_MOUSE_Cys49	K.SACGVCPGR.L	20.2096	20.4672	20.5146	20.6419	20.5495	20.5347	20.3971	0.13402	20.5754	0.0474241	0.178286	0.150812
RL34_MOUSE	60S ribosomal protein L34	RL34_MOUSE_Cys83	R.AYGGSM*CAK.C	19.5978	19.9692	19.9771	19.9952	20.0621	19.9916	19.848	0.176956	20.0163	0.0324103	0.168258	0.256489
RL35A_MOUSE	60S ribosomal protein L35a	RL35A_MOUSE_Cys47	R.CAYVYK.A	18.0421	19.0586	19.152	18.7553	18.8762	18.5262	18.7509	0.502633	18.7192	0.145122	-0.0316574	0.935916
RL37_MOUSE	60S ribosomal protein L37	RL37_MOUSE_Cys19	R.NKTHTLCR.R	14.5716	14.7664	14.7786	14.8864	14.7974	14.7427	14.7056	0.0948269	14.8088	0.0592293	0.103281	0.261469
RL37_MOUSE	60S ribosomal protein L37	RL37_MOUSE_Cys37	K.CGYPAKR.K	18.1731	18.2626	18.3132	18.3542	18.3244	18.2197	18.2496	0.0579188	18.2994	0.0576949	0.0497984	0.437563
RL4_MOUSE	60S ribosomal protein L4	RL4_MOUSE_Cys125	R.YAICSALAASALPALVMSK.G	20.4948	20.1943	20.6223	20.6585	20.6841	20.5506	20.4372	0.179421	20.6311	0.0578846	0.193913	0.219463
RL4_MOUSE	60S ribosomal protein L4	RL4_MOUSE_Cys208	R.RGPCIIYNEDNGIIK.A	20.1638	20.1299	20.7586	20.6848	20.3548	20.5374	20.3507	0.288694	20.5257	0.134966	0.174937	0.480912
RL4_MOUSE	60S ribosomal protein L4	RL4_MOUSE_Cys250	R.FCIWTESAFR.K	15.9118	15.8222	15.4138	15.9753	15.8222	16.166	15.7159	0.216768	15.9878	0.14063	0.271902	0.210928
RL4_MOUSE	60S ribosomal protein L4	RL4_MOUSE_Cys96	R.SGQGAFGNM*CR.G	14.3598	14.8739	14.7064	14.8698	14.8094	14.819	14.6467	0.214084	14.8327	0.0265271	0.186008	0.289671
RL5_MOUSE	60S ribosomal protein L5	RL5_MOUSE_Cys100	K.VGLTNYAAAYCTGLLLAR.R	18.6797	19.0553	18.6737	18.8739	18.9449	18.524	18.8029	0.178488	18.7809	0.183966	-0.0219554	0.909426
RL7_MOUSE	60S ribosomal protein L7	RL7_MOUSE_Cys208	K.FGIICMEDLIHEIYTVGK.R	20.1617	20.1896	20.5936	20.6767	20.7095	20.3209	20.315	0.197356	20.569	0.175989	0.254066	0.245782
RL7A_MOUSE	60S ribosomal protein L7a	RL7A_MOUSE_Cys182	K.MGVPYCIIK.G	22.3768	22.3474	22.4597	22.7075	22.6879	22.6641	22.3946	0.0475374	22.6865	0.0177458	0.29186	0.00124255
RL7A_MOUSE	60S ribosomal protein L7a	RL7A_MOUSE_Cys199	K.TCTTVAFTQVNSEDKGALAK.L	20.4061	20.5331	20.533	20.6029	20.5252	20.3605	20.4907	0.0598349	20.4962	0.101071	0.00544826	0.950844
RL8_MOUSE	60S ribosomal protein L8	RL8_MOUSE_Cys114	K.AQLNIGNVLPVGTMPEGTIVCCLEEKPGDR.G	17.1131	17.0225	17.1273	17.5346	17.3783	17.1794	17.0876	0.0464129	17.3641	0.145371	0.276482	0.0624872
RL8_MOUSE	60S ribosomal protein L8	RL8_MOUSE_Cys115	K.AQLNIGNVLPVGTMPEGTIVC#CLEEKPGDR.G	17.1459	16.9391	17.2319	17.416	17.3633	17.1348	17.1057	0.122897	17.3047	0.122083	0.199039	0.179502
RL8_MOUSE	60S ribosomal protein L8	RL8_MOUSE_Cys90	R.TELFIAAEGIHTGQFVYCGK.K	19.4167	19.7381	19.5352	19.6907	19.6373	19.9471	19.5633	0.132737	19.7583	0.135243	0.195014	0.219267
RL9_MOUSE	60S ribosomal protein L9	RL9_MOUSE_Cys134	R.TGVACSVSQAQK.D	17.3073	17.1257	16.8934	16.7481	17.0382	16.9491	17.1088	0.169374	16.9118	0.121323	-0.196972	0.252186
RL9_MOUSE	60S ribosomal protein L9	RL9_MOUSE_Cys74	R.TICSHVQNMIK.G	20.9418	20.7085	20.8241	20.7798	20.8387	20.624	20.8248	0.0952203	20.7475	0.0905504	-0.0773053	0.452194
RLA0_MOUSE	60S acidic ribosomal protein P0	RLA0_MOUSE_Cys119	R.AGAIAPCEVTVPAQNTGLGPEK.T	16.3572	17.0416	16.6166	16.7593	16.5986	16.4542	16.6718	0.282116	16.604	0.124606	-0.0677382	0.771606
RLA0_MOUSE	60S acidic ribosomal protein P0	RLA0_MOUSE_Cys27	K.IIQLLDDYPKCFIVGADNVGSK.Q	19.0813	19.1629	19.3408	19.2216	19.2368	19.3909	19.195	0.108362	19.2831	0.0764615	0.0880921	0.400727
RM30_MOUSE	39S ribosomal protein L30, mitochondrial	RM30_MOUSE_Cys138	K.LPQGLPTEETMSSTCLK.S	19.8969	19.7323	20.0204	19.8218	19.7046	19.6046	19.8832	0.11803	19.7103	0.0887993	-0.172877	0.17322
RM32_MOUSE	39S ribosomal protein L32, mitochondrial	RM32_MOUSE_Cys122	K.HVLCGYCYEK.V	13.9924	14.7119	14.6886	14.5717	15.0021	14.2645	14.4643	0.333822	14.6128	0.30251	0.148488	0.665371
RM32_MOUSE	39S ribosomal protein L32, mitochondrial	RM32_MOUSE_Cys125	K.HVLCGYCYEK.V	13.9924	14.7119	14.6886	14.5717	15.0021	14.2645	14.4643	0.333822	14.6128	0.30251	0.148488	0.665371
RM37_MOUSE	39S ribosomal protein L37, mitochondrial	RM37_MOUSE_Cys207	R.TSAQNCTLATTWNR.E	17.1372	17.1188	17.0088	16.8413	16.7122	16.8247	17.0882	0.0566947	16.7927	0.0573608	-0.295535	0.00659627
RM38_MOUSE	39S ribosomal protein L38, mitochondrial	RM38_MOUSE_Cys143	R.TCGPYHK.Q	17.5791	17.6483	17.8108	17.3997	17.6501	17.437	17.6794	0.0971094	17.4956	0.110302	-0.183807	0.151649
RN149_MOUSE	E3 ubiquitin-protein ligase RNF149	RN149_MOUSE_Cys88	R.APAPAEGCAPDTR.F	13.1592	13.157	12.9741	12.959	13.1559	12.7496	13.0968	0.0867689	12.9548	0.165917	-0.14193	0.344086
RNF13_MOUSE	E3 ubiquitin-protein ligase RNF13	RNF13_MOUSE_Cys77	K.GFLINSKPENACEPIVPPPLK.D	12.3857	12.5493	12.0303	11.3724	11.9274	11.6998	12.3218	0.216631	11.6665	0.227807	-0.65526	0.0420624
ROAA_MOUSE	Heterogeneous nuclear ribonucleoprotein A/B	ROAA_MOUSE_Cys104	K.FGEVVDCTIK.M	21.3	21.3342	21.2922	21.5685	21.5915	21.5499	21.3088	0.0182454	21.57	0.0170255	0.261151	0.000121357
RPA1_MOUSE	DNA-directed RNA polymerase I subunit RPA1	RPA1_MOUSE_Cys205	K.QCPHC#K.T	14.6249	14.4165	14.5823	14.4697	14.3103	14.21	14.5412	0.0898988	14.33	0.106899	-0.211221	0.0992419
RPA1_MOUSE	DNA-directed RNA polymerase I subunit RPA1	RPA1_MOUSE_Cys887	K.ACMPLGLHR.Q	16.5856	16.5962	16.6224	16.56	16.5273	16.549	16.6014	0.0154876	16.5454	0.0135777	-0.0559847	0.0183956
RPN1_MOUSE	Dolichyl-diphosphooligosaccharide--protein glycosyltransferase subunit 1	RPN1_MOUSE_Cys478	K.VACITEQVLTLVNK.R	16.7336	16.3322	16.598	16.4661	16.5384	16.4934	16.5546	0.166711	16.4993	0.029823	-0.0553023	0.668224
RPN1_MOUSE	Dolichyl-diphosphooligosaccharide--protein glycosyltransferase subunit 1	RPN1_MOUSE_Cys546	K.TEGSDLCDR.V	19.6351	19.6845	19.6671	19.6063	19.6231	19.3809	19.6622	0.0204202	19.5367	0.110434	-0.12549	0.189207
RPN2_MOUSE	Dolichyl-diphosphooligosaccharide--protein glycosyltransferase subunit 2	RPN2_MOUSE_Cys72	K.KACTFIK.S	18.8437	18.7896	18.6072	18.7706	18.8156	18.5575	18.7468	0.101174	18.7146	0.112565	-0.0322837	0.777946
RRBP1_MOUSE	Ribosome-binding protein 1	RRBP1_MOUSE_Cys1415	K.HMAAASAECQNYAK.E	16.0961	16.2542	16.5548	16.0941	16.0913	16.2498	16.3017	0.19026	16.1451	0.0740864	-0.156671	0.338873
RS11_MOUSE	40S ribosomal protein S11	RS11_MOUSE_Cys116	K.NMSVHLSPCFR.D	19.4343	19.3326	19.3614	19.1907	19.1764	18.9431	19.3761	0.0428332	19.1034	0.113506	-0.272698	0.033573
RS11_MOUSE	40S ribosomal protein S11	RS11_MOUSE_Cys131	R.DVQIGDIVTVGECRPLSK.T	21.0261	21.4472	21.5128	21.5503	21.7028	21.4681	21.3287	0.215619	21.5737	0.0972624	0.24504	0.216777
RS11_MOUSE	40S ribosomal protein S11	RS11_MOUSE_Cys60	K.KCPFTGNVSIR.G	20.0278	19.8777	20.1915	20.1212	20.319	19.9355	20.0323	0.12816	20.1252	0.156581	0.0928799	0.551628
RS12_MOUSE	40S ribosomal protein S12	RS12_MOUSE_Cys106	R.KVVGCSCVVVK.D	24.1617	24.1518	23.5685	23.8814	24.0358	23.9925	23.9607	0.277331	23.9699	0.0650291	0.00921306	0.96571
RS12_MOUSE	40S ribosomal protein S12	RS12_MOUSE_Cys108	K.VVGC#SCVVVK.D	24.0703	24.059	23.4152	23.7931	23.9506	23.9035	23.8482	0.306199	23.8824	0.0660236	0.0342351	0.884649
RS12_MOUSE	40S ribosomal protein S12	RS12_MOUSE_Cys92	K.LGEWVGLCK.I	22.3074	22.283	22.3621	22.3838	22.1291	22.1703	22.3175	0.0330665	22.2277	0.111656	-0.0897759	0.336868
RS15A_MOUSE	40S ribosomal protein S15a	RS15A_MOUSE_Cys30	R.QVLIRPCSK.V	20.7403	20.4889	20.7084	20.7275	20.484	20.5574	20.6459	0.111772	20.5897	0.102002	-0.0562224	0.627051
RS15A_MOUSE	40S ribosomal protein S15a	RS15A_MOUSE_Cys72	K.CGVISPR.F	21.0681	21.0293	21.3111	20.9713	21.0671	20.9373	21.1362	0.124698	20.9919	0.0549714	-0.144283	0.208666
RS16_MOUSE	40S ribosomal protein S16	RS16_MOUSE_Cys25	K.TATAVAHCKR.G	20.8746	20.9839	20.9043	21.0651	21.1816	20.8094	20.9209	0.0461381	21.0187	0.155421	0.097794	0.441698
RS17_MOUSE	40S ribosomal protein S17	RS17_MOUSE_Cys35	R.VCEEIAIIPSKK.L	19.3707	19.5024	19.5501	19.6031	19.4887	19.5038	19.4744	0.0758469	19.5318	0.0507492	0.0574399	0.423697
RS2_MOUSE	40S ribosomal protein S2	RS2_MOUSE_Cys182	K.IGKPHTVPCK.V	21.9443	22.0472	22.4946	22.4493	22.1701	22.2717	22.162	0.238861	22.297	0.115359	0.135002	0.511487
RS2_MOUSE	40S ribosomal protein S2	RS2_MOUSE_Cys188	R.CGSVLVR.L	19.655	19.6212	19.8555	19.6845	19.7017	19.5508	19.7106	0.103402	19.6457	0.067447	-0.0649131	0.498421
RS2_MOUSE	40S ribosomal protein S2	RS2_MOUSE_Cys222	K.KLLMMAGIDDCYTSAR.G	18.3005	18.042	18.7147	18.7069	18.3928	18.3779	18.3524	0.277091	18.4925	0.151681	0.140124	0.564475
RS2_MOUSE	40S ribosomal protein S2	RS2_MOUSE_Cys229	R.GCTATLGNFAK.A	21.4821	21.1494	21.9464	21.936	21.4896	21.6822	21.526	0.326884	21.7026	0.182826	0.176628	0.54132
RS20_MOUSE	40S ribosomal protein S20	RS20_MOUSE_Cys36	K.SLEKVCADLIR.G	17.937	17.8508	18.3278	18.1397	18.105	18.002	18.0385	0.207529	18.0822	0.0584481	0.0437023	0.788609
RS21_MOUSE	40S ribosomal protein S21	RS21_MOUSE_Cys17	R.KCSASNR.I	13.0806	12.8626	13.5712	13.2271	13.0609	13.1708	13.1715	0.296311	13.1529	0.0690215	-0.0185626	0.935387
RS26_MOUSE	40S ribosomal protein S26	RS26_MOUSE_Cys23	R.GHVQPIRCTNCAR.C	13.013	13.0375	13.2108	13.3273	13.112	13.078	13.0871	0.0880477	13.1724	0.110396	0.0852981	0.441098
RS26_MOUSE	40S ribosomal protein S26	RS26_MOUSE_Cys26	R.GHVQPIRCTNCAR.C	13.013	13.0375	13.2108	13.3273	13.112	13.078	13.0871	0.0880477	13.1724	0.110396	0.0852981	0.441098
RS26_MOUSE	40S ribosomal protein S26	RS26_MOUSE_Cys74	K.LHYCVSCAIHSK.V	16.6618	16.6305	16.6115	16.696	16.6061	16.3123	16.6346	0.0207469	16.5381	0.163854	-0.0964477	0.455304
RS26_MOUSE	40S ribosomal protein S26	RS26_MOUSE_Cys77	K.LHYCVSCAIHSK.V	16.6618	16.6305	16.6115	16.696	16.6061	16.3123	16.6346	0.0207469	16.5381	0.163854	-0.0964477	0.455304
RS27L_MOUSE	40S ribosomal protein S27-like	RS27L_MOUSE_Cys77	R.LTEGCSFRR.K	23.3659	23.4676	23.5231	23.452	23.5057	23.149	23.4522	0.0650855	23.3689	0.157059	-0.0832767	0.526597
RS29_MOUSE	40S ribosomal protein S29	RS29_MOUSE_Cys39	R.KYGLNMCR.Q	22.4598	22.3255	21.5999	22.4239	22.1578	21.9252	22.1284	0.377712	22.169	0.203734	0.040589	0.900056
RS3_MOUSE	40S ribosomal protein S3	RS3_MOUSE_Cys119	R.ACYGVLR.F	22.6004	22.4262	22.7754	22.801	22.7868	22.747	22.6007	0.142559	22.7783	0.02285	0.177566	0.156969
RS3_MOUSE	40S ribosomal protein S3	RS3_MOUSE_Cys97	R.GLCAIAQAESLR.Y	17.1269	16.6946	17.1646	16.5192	16.5871	16.8642	16.9954	0.213267	16.6568	0.149215	-0.338564	0.139674
RS3A_MOUSE	40S ribosomal protein S3a	RS3A_MOUSE_Cys111	K.MCSMVK.K	21.6965	21.5732	21.8914	22.1096	21.8429	21.9386	21.7204	0.131021	21.9637	0.11031	0.243323	0.114915
RS3A_MOUSE	40S ribosomal protein S3a	RS3A_MOUSE_Cys139	R.LFCVGFTK.K	22.9821	23.0158	23.4897	23.7296	23.3843	23.6626	23.1625	0.231732	23.5922	0.149548	0.42967	0.0923197
RS3A_MOUSE	40S ribosomal protein S3a	RS3A_MOUSE_Cys201	K.ACQSIYPLHDVFVR.K	19.7704	19.6922	19.7731	19.8989	19.5719	19.7124	19.7452	0.0375423	19.7277	0.133928	-0.0175297	0.867202
RS4X_MOUSE	40S ribosomal protein S4, X isoform	RS4X_MOUSE_Cys181	K.FDTGNLCMVTGGANLGR.I	19.3972	19.4905	19.5874	19.4876	19.6878	19.4432	19.4917	0.0776503	19.5395	0.106372	0.047825	0.634628
RS5_MOUSE	40S ribosomal protein S5	RS5_MOUSE_Cys66	R.KAQCPIVER.L	22.0447	22.0501	22.1724	22.3359	22.0333	21.9509	22.0891	0.0589525	22.1067	0.165493	0.0176525	0.893869
RS6_MOUSE	40S ribosomal protein S6	RS6_MOUSE_Cys100	R.GCIVDANLSVLNLVIVK.K	17.3237	17.2608	18.0119	17.9681	17.7315	17.8442	17.5321	0.340201	17.8479	0.0966611	0.31582	0.275235
RS6_MOUSE	40S ribosomal protein S6	RS6_MOUSE_Cys12	-.MKLNISFPATGCQK.L	21.5171	21.5355	22.1423	22.4502	22.2056	22.3531	21.7316	0.290496	22.3363	0.100585	0.604628	0.0497434
RS8_MOUSE	40S ribosomal protein S8	RS8_MOUSE_Cys71	R.LDVGNFSWGSECC#TR.K	19.9479	19.7573	20.0893	20.0171	19.9594	20.0058	19.9315	0.136015	19.9941	0.0249693	0.0626341	0.556679
RS8_MOUSE	40S ribosomal protein S8	RS8_MOUSE_Cys72	R.LDVGNFSWGSEC#CTR.K	20.6297	20.3983	20.9502	21.0175	20.9118	20.9796	20.6594	0.226287	20.9696	0.0437045	0.310206	0.129715
RT18A_MOUSE	28S ribosomal protein S18a, mitochondrial	RT18A_MOUSE_Cys108	R.RVTGLCR.E	18.8524	18.8902	18.7101	18.6103	18.6458	18.4542	18.8176	0.0775177	18.5701	0.0832223	-0.247516	0.0370119
RT18A_MOUSE	28S ribosomal protein S18a, mitochondrial	RT18A_MOUSE_Cys186	K.DNVCYSR.R	14.9021	15.0187	14.9323	14.6723	14.7412	14.5656	14.951	0.0494304	14.6597	0.0722431	-0.291302	0.00926534
RTCB_MOUSE	tRNA-splicing ligase RtcB homolog	RTCB_MOUSE_Cys485	K.NVTDVVNTCHDAGISKK.A	14.7774	15.7567	14.4437	15.0157	15.3863	15.4073	14.9926	0.557197	15.2698	0.179866	0.277177	0.539849
RTF2_MOUSE	Protein RTF2 homolog	RTF2_MOUSE_Cys208	K.TATECASKPGTTQDSAGPSK.V	13.6563	13.3608	13.4409	12.8925	12.9694	12.9594	13.486	0.124795	12.9404	0.0341206	-0.545571	0.00396981
RTN4_MOUSE	Reticulon-4	RTN4_MOUSE_Cys884	K.SEIANVQSGANSLPCSELPC#DLSFK.N	14.9304	14.8984	15.18	15.1388	15.0484	15.0748	15.0029	0.1259	15.0873	0.037969	0.0843746	0.415517
RUFY1_MOUSE	RUN and FYVE domain-containing protein 1	RUFY1_MOUSE_Cys159	R.SLDADYAPLQQFFVVMEHCLK.H	17.8831	17.6797	17.9399	17.9524	17.8677	18.052	17.8342	0.111699	17.9574	0.0753281	0.12315	0.265728
S10AB_MOUSE	Protein S100-A11	S10AB_MOUSE_Cys8	R.CIESLIAVFQK.Y	14.555	14.4467	15.5075	14.761	15.0041	14.5635	14.8364	0.476585	14.7762	0.180228	-0.0601729	0.875463
S12A7_MOUSE	Solute carrier family 12 member 7	S12A7_MOUSE_Cys323	R.NFDTCAK.M	21.3517	21.2804	21.3685	20.996	21.079	21.007	21.3336	0.0381964	21.0273	0.0368183	-0.306235	0.00122587
S35F6_MOUSE	Solute carrier family 35 member F6	S35F6_MOUSE_Cys254	R.GVLEDALDAFCQVGR.Q	16.0248	16.134	16.0534	15.7086	16.3421	15.8438	16.0707	0.0462287	15.9648	0.272409	-0.105901	0.616577
S39A6_MOUSE	Zinc transporter ZIP6	S39A6_MOUSE_Cys153	K.AFCPDLDSDNSGKNPR.T	19.4782	19.4503	19.1137	19.3502	19.2565	18.8769	19.3474	0.16564	19.1612	0.204611	-0.186208	0.373761
S61A1_MOUSE	Protein transport protein Sec61 subunit alpha isoform 1	S61A1_MOUSE_Cys13	K.FLEVIKPFCVILPEIQKPER.K	17.6772	17.9548	17.9329	18.3072	18.1394	17.7502	17.855	0.125987	18.0656	0.233291	0.210633	0.324095
S6A12_MOUSE	Sodium- and chloride-dependent betaine transporter	S6A12_MOUSE_Cys596	R.RPPQDGSSAQNCSSSPAK.Q	12.0501	11.7322	11.8941	11.1143	11.6018	11.3862	11.8921	0.129794	11.3674	0.199461	-0.524698	0.0355903
SAE2_MOUSE	SUMO-activating enzyme subunit 2	SAE2_MOUSE_Cys173	R.TFPGCTIR.N	23.2722	23.041	22.8602	22.5644	22.5449	22.47	23.0578	0.168618	22.5265	0.0406678	-0.531358	0.0123272
SAMH1_MOUSE	Deoxynucleoside triphosphate triphosphohydrolase SAMHD1	SAMH1_MOUSE_Cys533	R.VHFYCK.S	18.2668	18.2062	18.02	17.8097	17.9357	17.8566	18.1644	0.105021	17.8673	0.0519742	-0.297019	0.0230706
SART3_MOUSE	Squamous cell carcinoma antigen recognized by T-cells 3	SART3_MOUSE_Cys473	R.FSESGDPSCLIMQSWAR.V	17.7179	17.6028	17.8494	17.691	17.5191	17.5567	17.7234	0.100756	17.5889	0.0737691	-0.13445	0.202507
SART3_MOUSE	Squamous cell carcinoma antigen recognized by T-cells 3	SART3_MOUSE_Cys487	R.LCNNM*QK.A	19.4604	19.5926	19.5422	19.3736	19.4235	19.4256	19.5317	0.0544657	19.4075	0.0240053	-0.124197	0.0419321
SC31A_MOUSE	Protein transport protein Sec31A	SC31A_MOUSE_Cys1140	R.CLSSATDPQTK.R	16.9889	17.0338	17.3155	16.9435	16.9109	16.8105	17.1127	0.144532	16.8883	0.0566002	-0.224404	0.110371
SC31A_MOUSE	Protein transport protein Sec31A	SC31A_MOUSE_Cys703	R.LVACWTK.A	18.9935	18.7922	18.6724	18.7444	18.7496	18.7315	18.8193	0.132489	18.7418	0.00763857	-0.0774959	0.455306
SCFD1_MOUSE	Sec1 family domain-containing protein 1	SCFD1_MOUSE_Cys482	K.ALTDAGCNLSPLQYIK.Q	17.5449	17.7739	17.9395	17.6946	17.7738	17.5949	17.7528	0.161787	17.6877	0.0732014	-0.0650338	0.631838
SCMC1_MOUSE	Calcium-binding mitochondrial carrier protein SCaMC-1	SCMC1_MOUSE_Cys328	K.TGQYSGIYGCAK.K	18.4797	18.466	18.7314	18.1465	18.3027	18.2887	18.559	0.121995	18.246	0.0705505	-0.313039	0.0348012
SDCB1_MOUSE	Syntenin-1	SDCB1_MOUSE_Cys119	R.EVILCKDQDGK.I	18.8747	18.7296	18.8115	18.6868	18.7776	18.412	18.8053	0.0594028	18.6255	0.155406	-0.179815	0.20112
SDF2L_MOUSE	Stromal cell-derived factor 2-like protein 1	SDF2L_MOUSE_Cys100	R.GLPVRCGQAVR.L	19.0399	19.0476	18.9545	18.7302	18.8689	18.7662	19.014	0.0421932	18.7884	0.0587676	-0.225591	0.011602
SDF2L_MOUSE	Stromal cell-derived factor 2-like protein 1	SDF2L_MOUSE_Cys38	K.ASAGLVTCGSVLK.L	21.4148	21.2323	21.0233	20.9108	21.0487	20.6987	21.2235	0.159938	20.8861	0.143954	-0.337398	0.0908704
SEC62_MOUSE	Translocation protein SEC62	SEC62_MOUSE_Cys82	R.ESVVDYCNR.L	18.3268	18.1533	18.2365	18.1945	18.0814	17.9677	18.2388	0.0708642	18.0812	0.0925924	-0.157606	0.128509
SEC63_MOUSE	Translocation protein SEC63 homolog	SEC63_MOUSE_Cys366	R.APTLASLENCMK.L	14.9038	15.3303	14.1874	14.9663	14.4886	15.2467	14.8072	0.47154	14.9006	0.312986	0.0933815	0.826952
SEH1_MOUSE	Nucleoporin SEH1	SEH1_MOUSE_Cys30	R.MATCSSDQSVK.V	16.287	16.2292	16.3449	16.1879	16.2167	16.1131	16.287	0.0472159	16.1725	0.0436428	-0.114472	0.0655079
SEM4D_MOUSE	Semaphorin-4D	SEM4D_MOUSE_Cys707	K.SSSGTSCEPK.M	13.835	13.7668	13.5369	12.986	13.1738	13.2235	13.7129	0.127553	13.1278	0.102268	-0.58512	0.00717346
SEPT7_MOUSE	Septin-7	SEPT7_MOUSE_Cys203	K.ADTLTPEECQQFKK.Q	18.9271	19.1278	19.2901	18.9579	19.0001	19.0913	19.115	0.148464	19.0164	0.0556674	-0.0985989	0.42883
SERA_MOUSE	D-3-phosphoglycerate dehydrogenase	SERA_MOUSE_Cys281	R.ALVDHENVISCPHLGASTK.E	18.5827	17.818	18.2209	18.0289	17.9589	17.9518	18.2072	0.312356	17.9799	0.0347989	-0.227341	0.36415
SERC_MOUSE	Phosphoserine aminotransferase	SERC_MOUSE_Cys175	K.GAVLVCDMSSNFLSRPVDVSK.F	18.3376	18.3945	18.511	18.1689	18.2478	18.1182	18.4144	0.0721726	18.1783	0.0533128	-0.2361	0.0204531
SERC1_MOUSE	Serine incorporator 1	SERC1_MOUSE_Cys81	K.GVVPCNILVGYK.A	19.7226	19.6675	19.6173	19.4519	19.4015	19.3317	19.6691	0.0429994	19.395	0.0492821	-0.274112	0.00406039
SERC3_MOUSE	Serine incorporator 3	SERC3_MOUSE_Cys72	K.KIPGFCEGGFQIK.M	20.6071	20.8551	20.9344	20.5025	20.3671	20.3357	20.7989	0.13939	20.4017	0.0723734	-0.397153	0.0232484
SF01_MOUSE	Splicing factor 1	SF01_MOUSE_Cys279	R.SITNTTVCTK.C	19.4269	19.4112	19.3669	19.0652	19.1288	19.0763	19.4017	0.0254037	19.0901	0.0277399	-0.3116	0.00030361
SFR1_MOUSE	Swi5-dependent recombination DNA repair protein 1 homolog	SFR1_MOUSE_Cys199	K.SSEEKNTCESK.S	14.4575	14.1874	13.8178	13.6886	13.7622	13.4883	14.1542	0.262233	13.6464	0.115716	-0.507883	0.0663497
SGTA_MOUSE	Small glutamine-rich tetratricopeptide repeat-containing protein alpha	SGTA_MOUSE_Cys130	K.AIELNPANAVYFCNR.A	18.8411	18.8462	18.5785	18.6047	18.6102	18.43	18.7553	0.124985	18.5483	0.0836998	-0.206953	0.123568
SH3L1_MOUSE	SH3 domain-binding glutamic acid-rich-like protein	SH3L1_MOUSE_Cys25	K.QQDVLCFLEANK.I	18.5222	18.2219	18.439	18.6408	18.6096	18.3649	18.3944	0.126629	18.5384	0.123383	0.144056	0.313378
SHOT1_MOUSE	Shootin-1	SHOT1_MOUSE_Cys550	R.KLEGCTNPK.V	20.2718	19.69	20.1819	20.3288	19.9435	19.9715	20.0479	0.25574	20.0813	0.175397	0.0334054	0.886293
SIAE_MOUSE	Sialate O-acetylesterase	SIAE_MOUSE_Cys513	R.YAWTTWPCEYK.Q	18.3437	18.4046	18.1614	18.2115	18.0755	18.0355	18.3033	0.103312	18.1075	0.0753075	-0.19576	0.0962972
SLK_MOUSE	STE20-like serine/threonine-protein kinase	SLK_MOUSE_Cys1210	K.MTGESECLNPSAQSR.I	16.2898	15.9217	15.8959	15.9769	15.6992	15.9939	16.0358	0.179925	15.89	0.135059	-0.145838	0.411145
SMAD2_MOUSE	Mothers against decapentaplegic homolog 2	SMAD2_MOUSE_Cys129	K.GLPHVIYCR.L	15.4861	15.672	15.6638	15.9181	15.3152	15.6148	15.6073	0.0857876	15.616	0.246144	0.0087392	0.964456
SMAD2_MOUSE	Mothers against decapentaplegic homolog 2	SMAD2_MOUSE_Cys374	R.YGWHPATVCK.I	14.4639	14.9209	14.7018	14.4761	14.5113	14.6259	14.6956	0.186626	14.5378	0.063956	-0.15778	0.32125
SMAD2_MOUSE	Mothers against decapentaplegic homolog 2	SMAD2_MOUSE_Cys70	K.AITTQNCNTK.C	18.4631	18.5698	18.4274	18.1562	18.1769	18.1232	18.4868	0.0605109	18.1521	0.0221385	-0.334687	0.00182873
SMHD1_MOUSE	Structural maintenance of chromosomes flexible hinge domain-containing protein 1	SMHD1_MOUSE_Cys897	K.GPVNSCQGK.N	13.8196	13.9024	14.1806	15.3718	15.39	15.3318	13.9675	0.154407	15.3645	0.0242926	1.39699	0.000225586
SMU1_MOUSE	WD40 repeat-containing protein SMU1	SMU1_MOUSE_Cys298	K.IQSGQCLR.R	17.3037	17.383	17.3335	17.3076	17.3763	17.2588	17.3401	0.0327337	17.3142	0.0482149	-0.0258424	0.564595
SND1_MOUSE	Staphylococcal nuclease domain-containing protein 1	SND1_MOUSE_Cys549	K.ETCLITFLLAGIEC#PR.G	15.7851	15.5085	15.9723	16.2951	15.6668	15.8772	15.7553	0.190517	15.9464	0.26111	0.191056	0.450222
SNX5_MOUSE	Sorting nexin-5	SNX5_MOUSE_Cys347	K.LAETHQQEC#CQK.F	16.3746	16.2136	16.5691	16.2204	16.2326	16.2245	16.3857	0.145346	16.2258	0.00504709	-0.159899	0.194948
SNX5_MOUSE	Sorting nexin-5	SNX5_MOUSE_Cys397	R.NNVSLLQSCIDLFK.N	16.66	16.5923	16.8712	16.3016	16.4833	16.3347	16.7078	0.118784	16.3732	0.0790461	-0.334636	0.0294665
SON_MOUSE	Protein SON	SON_MOUSE_Cys2088	K.ANAAAMCAK.A	17.6438	17.5933	17.543	17.9329	17.9929	17.6469	17.5933	0.0411564	17.8575	0.150947	0.264207	0.0753184
SPAG7_MOUSE	Sperm-associated antigen 7	SPAG7_MOUSE_Cys191	K.TYGCVPVANK.R	19.3748	19.0489	19.1315	19.0654	18.9052	18.8838	19.1851	0.138298	18.9514	0.0810621	-0.233624	0.108324
SPP2A_MOUSE	Signal peptide peptidase-like 2A	SPP2A_MOUSE_Cys98	K.AVVVHWGPCHFLEK.A	17.6028	17.311	17.4606	17.6702	17.0388	17.0602	17.4581	0.119129	17.2564	0.29275	-0.201724	0.417771
SPSY_MOUSE	Spermine synthase	SPSY_MOUSE_Cys318	K.YFTQGNCVNLTEALSLYEEQLGR.L	17.0945	17.1139	16.7596	16.967	16.9378	16.5361	16.9893	0.162612	16.8137	0.196595	-0.175681	0.385291
SPT5H_MOUSE	Transcription elongation factor SPT5	SPT5H_MOUSE_Cys1006	R.SVTGGMCSVYLK.D	19.0395	19.0586	18.9652	18.8117	18.776	18.7245	19.0211	0.0403019	18.7707	0.0357856	-0.250392	0.00277711
SPTN1_MOUSE	Spectrin alpha chain, non-erythrocytic 1	SPTN1_MOUSE_Cys1622	R.GACAGSEDAVK.A	15.6028	15.7788	16.1784	16.1113	16.0818	15.9519	15.8533	0.240822	16.0483	0.0692543	0.19504	0.332793
SQRD_MOUSE	Sulfide:quinone oxidoreductase, mitochondrial	SQRD_MOUSE_Cys201	K.CAGAPQK.I	17.1806	17.1488	16.9461	16.6947	16.5434	16.5996	17.0918	0.10389	16.6126	0.0624576	-0.479277	0.00501962
SQSTM_MOUSE	Sequestosome-1	SQSTM_MOUSE_Cys128	R.NMVHPNVICDGCNGPVVGTR.Y	16.8895	16.6185	16.5488	16.7232	16.474	16.485	16.6856	0.146954	16.5607	0.114951	-0.124889	0.397419
SQSTM_MOUSE	Sequestosome-1	SQSTM_MOUSE_Cys131	R.NMVHPNVICDGCNGPVVGTR.Y	16.8895	16.6185	16.5488	16.7232	16.474	16.485	16.6856	0.146954	16.5607	0.114951	-0.124889	0.397419
SRPR_MOUSE	Signal recognition particle receptor subunit alpha	SRPR_MOUSE_Cys361	K.NVAADIAVQLCESVANKLEGK.V	14.5413	14.3214	14.3856	14.7778	13.8274	14.4284	14.4161	0.0923257	14.3446	0.392506	-0.0715327	0.814262
SRRM2_MOUSE	Serine/arginine repetitive matrix protein 2	SRRM2_MOUSE_Cys780	R.SLSGSSPCPK.Q	16.8142	16.7311	16.3887	17.1981	17.1649	16.8397	16.6447	0.18416	17.0676	0.161715	0.422894	0.0711913
SRRT_MOUSE	Serrate RNA effector molecule homolog	SRRT_MOUSE_Cys420	K.TCSLFMR.N	19.6324	19.6612	19.7419	19.7259	19.6868	19.4881	19.6785	0.0463649	19.6336	0.104102	-0.0448906	0.60717
SSRP1_MOUSE	FACT complex subunit SSRP1	SSRP1_MOUSE_Cys139	K.FGGQLLSFDIGDQPVFEIPLSNVSQCTTGK.N	14.0565	13.4355	13.4694	13.5915	13.6602	13.2954	13.6538	0.285098	13.5157	0.158269	-0.138122	0.581426
SSRP1_MOUSE	FACT complex subunit SSRP1	SSRP1_MOUSE_Cys200	K.ADVIQATGDAICIFR.E	19.2437	19.1195	19.3347	19.1506	19.013	19.1136	19.2327	0.0881833	19.0924	0.0581228	-0.140243	0.133607
STIP1_MOUSE	Stress-induced-phosphoprotein 1	STIP1_MOUSE_Cys26	K.ALSAGNIDDALQCYSEAIK.L	19.8624	19.8836	20.1354	19.8008	19.8555	19.4195	19.9605	0.123999	19.6919	0.193936	-0.26855	0.174311
STIP1_MOUSE	Stress-induced-phosphoprotein 1	STIP1_MOUSE_Cys370	K.NKGNECFQK.G	21.1414	21.0035	21.1307	20.7046	20.7099	20.5911	21.0919	0.0626229	20.6685	0.0548009	-0.423333	0.00197792
STIP1_MOUSE	Stress-induced-phosphoprotein 1	STIP1_MOUSE_Cys471	R.CMMAQYNR.H	19.5338	19.4422	19.4849	19.3159	19.3463	19.2304	19.487	0.0374419	19.2975	0.0490547	-0.189468	0.012234
STK10_MOUSE	Serine/threonine-protein kinase 10	STK10_MOUSE_Cys138	R.GLTEPQIQVVCR.Q	19.1017	19.0736	19.2011	19.0453	19.0081	19.0431	19.1255	0.0547064	19.0321	0.0170379	-0.0933224	0.0826337
STRAP_MOUSE	Serine-threonine kinase receptor-associated protein	STRAP_MOUSE_Cys270	K.GHFGPIHCVR.F	16.1693	15.6183	16.1364	16.0719	16.034	15.8256	15.9747	0.252352	15.9772	0.108279	0.00251643	0.99028
STT3A_MOUSE	Dolichyl-diphosphooligosaccharide--protein glycosyltransferase subunit STT3A	STT3A_MOUSE_Cys637	R.EGSPVLLNCLMYK.M	18.9652	19.1538	19.2042	19.1685	19.2002	19.0631	19.1077	0.102845	19.1439	0.0585967	0.0362199	0.68751
STX12_MOUSE	Syntaxin-12	STX12_MOUSE_Cys29	R.DFNSIIQTCSGNIQR.I	18.6388	18.786	18.6868	18.4505	18.3521	18.3924	18.7039	0.0612894	18.3983	0.0403884	-0.305525	0.00416337
STX7_MOUSE	Syntaxin-7	STX7_MOUSE_Cys28	K.ITQCSVEIQR.T	19.6747	19.6107	20.0389	19.6474	19.6099	19.5813	19.7748	0.188591	19.6129	0.0270697	-0.16191	0.295719
SUCB1_MOUSE	Succinyl-CoA ligase [ADP-forming] subunit beta, mitochondrial	SUCB1_MOUSE_Cys152	R.ICNQVLVC#ER.K	18.9186	18.7826	18.9311	18.4345	18.5091	18.4205	18.8775	0.0672525	18.4547	0.0389045	-0.422778	0.00153402
SUH_MOUSE	Recombining binding protein suppressor of hairless	SUH_MOUSE_Cys149	K.NYCTAK.T	19.6225	19.7575	19.7488	19.5619	19.7164	19.6134	19.7096	0.0616822	19.6306	0.0642703	-0.0790019	0.278059
SYAC_MOUSE	Alanine--tRNA ligase, cytoplasmic	SYAC_MOUSE_Cys403	R.KIQSLGDCK.T	20.5858	20.4155	20.5215	20.5638	20.4726	20.494	20.5076	0.0702381	20.5101	0.0389681	0.00254553	0.966401
SYDC_MOUSE	Aspartate--tRNA ligase, cytoplasmic	SYDC_MOUSE_Cys130	K.IGSCTQQDVELHVQK.I	18.4672	18.661	18.6028	18.4844	18.5279	18.2345	18.577	0.0811871	18.4156	0.129269	-0.161378	0.209212
SYEP_MOUSE	Bifunctional glutamate/proline--tRNA ligase	SYEP_MOUSE_Cys1377	K.SCQFVAVR.R	20.7924	20.8986	20.9482	20.7165	20.852	20.6453	20.8797	0.0649715	20.7379	0.0857242	-0.141792	0.135733
SYEP_MOUSE	Bifunctional glutamate/proline--tRNA ligase	SYEP_MOUSE_Cys337	K.GSQFGQSC#CLR.A	20.5569	20.2601	20.5762	20.1647	20.3965	20.2714	20.4644	0.144683	20.2776	0.0947227	-0.186853	0.20122
SYEP_MOUSE	Bifunctional glutamate/proline--tRNA ligase	SYEP_MOUSE_Cys350	K.IDMSSNNGCMR.D	17.9172	17.9253	17.8993	18.0057	18.1243	17.9025	17.9139	0.0108431	18.0108	0.0906323	0.0969116	0.207635
SYEP_MOUSE	Bifunctional glutamate/proline--tRNA ligase	SYEP_MOUSE_Cys856	K.VTEAVECLLSLK.A	16.2207	16.1579	16.4042	15.9712	16.2731	16.2578	16.2609	0.104498	16.1673	0.138836	-0.0935989	0.488646
SYFB_MOUSE	Phenylalanine--tRNA ligase beta subunit	SYFB_MOUSE_Cys151	K.LHQNICR.K	17.2293	17.2813	17.401	17.0934	17.2328	17.1856	17.3039	0.07187	17.1706	0.0578639	-0.133271	0.110608
SYG_MOUSE	Glycine--tRNA ligase	SYG_MOUSE_Cys362	K.FQSVADLCLYLYSAK.A	16.6504	16.8061	17.0642	17.2579	16.8922	17.2707	16.8402	0.170681	17.1403	0.175501	0.300068	0.15805
SYG_MOUSE	Glycine--tRNA ligase	SYG_MOUSE_Cys451	K.TSYGWIEIVGCADR.S	19.3676	19.539	19.6392	19.2832	19.3295	19.2205	19.5153	0.112142	19.2777	0.044669	-0.237553	0.0496605
SYHC_MOUSE	Histidine--tRNA ligase, cytoplasmic	SYHC_MOUSE_Cys379	R.KVPCVGLSIGVER.I	20.6001	20.3465	20.9018	20.635	20.3544	20.4554	20.6161	0.227001	20.4816	0.116046	-0.134534	0.496971
SYIC_MOUSE	Isoleucine--tRNA ligase, cytoplasmic	SYIC_MOUSE_Cys336	R.VCMDFNIIQK.D	19.5554	19.498	19.553	19.3635	19.3895	19.1727	19.5354	0.0265266	19.3086	0.0966508	-0.226853	0.03287
SYIC_MOUSE	Isoleucine--tRNA ligase, cytoplasmic	SYIC_MOUSE_Cys357	K.DSVPVC#PVDASGCFTEEVTHFVGQYVK.D	15.8667	15.7112	16.1251	15.4348	16.2231	15.4876	15.901	0.170684	15.7152	0.359842	-0.185836	0.54539
SYIM_MOUSE	Isoleucine--tRNA ligase, mitochondrial	SYIM_MOUSE_Cys819	R.SCQTALAEILDVLVR.A	14.7064	15.1302	15.2155	15.4857	15.0979	15.1389	15.0174	0.222618	15.2408	0.173925	0.223461	0.325933
SYK_MOUSE	Lysine--tRNA ligase	SYK_MOUSE_Cys425	K.ILDDICVAK.A	19.8205	20.0316	19.9868	19.8492	19.9908	19.9632	19.9463	0.0908486	19.9344	0.061271	-0.0119067	0.885313
SYLC_MOUSE	Leucine--tRNA ligase, cytoplasmic	SYLC_MOUSE_Cys1095	R.QGDSCESIIR.R	17.5514	17.5761	17.6214	17.4904	17.459	17.409	17.583	0.0289844	17.4528	0.0335087	-0.130164	0.0142046
SYLC_MOUSE	Leucine--tRNA ligase, cytoplasmic	SYLC_MOUSE_Cys370	K.ELMGEEILGASLSAPLTCYK.V	18.9361	19.0122	18.9428	19.0875	19.1899	18.8902	18.9637	0.0344162	19.0559	0.124381	0.0921772	0.369588
SYMC_MOUSE	Methionine--tRNA ligase, cytoplasmic	SYMC_MOUSE_Cys335	R.EICDKYHAIHADIYR.W	16.1248	16.246	16.2964	16.129	16.0718	16.192	16.2224	0.072004	16.1309	0.0491084	-0.0914578	0.211967
SYMC_MOUSE	Methionine--tRNA ligase, cytoplasmic	SYMC_MOUSE_Cys789	R.ILATSFICTLPAGHR.I	17.8298	17.7149	17.6506	17.777	17.6841	17.4507	17.7318	0.0741492	17.6372	0.137265	-0.0945248	0.439831
SYMPK_MOUSE	Symplekin	SYMPK_MOUSE_Cys1180	K.QKPTGIGAPAACVSSTPSVPAAAR.A	15.1147	15.1128	15.1604	14.8576	14.8274	14.6224	15.1293	0.0219901	14.7691	0.104505	-0.360184	0.00884194
SYNC_MOUSE	Asparagine--tRNA ligase, cytoplasmic	SYNC_MOUSE_Cys125	K.IIIKNDPSLPEPACVK.I	18.8229	18.7019	18.8893	18.6707	18.6968	18.5834	18.8047	0.0775728	18.6503	0.0485025	-0.154372	0.0754725
SYNC_MOUSE	Asparagine--tRNA ligase, cytoplasmic	SYNC_MOUSE_Cys449	R.LMTDTINEPILLCR.F	18.598	18.657	18.5994	18.4695	18.4488	18.3054	18.6181	0.0275099	18.4079	0.0729971	-0.210252	0.0189134
SYNC_MOUSE	Asparagine--tRNA ligase, cytoplasmic	SYNC_MOUSE_Cys548	R.DVCLYPR.F	19.6787	19.7505	19.9551	19.6705	19.72	19.1666	19.7948	0.117129	19.5191	0.250023	-0.275719	0.23073
SYPL1_MOUSE	Synaptophysin-like protein 1	SYPL1_MOUSE_Cys64	K.TEIQVNCPK.V	18.9432	18.9975	19.002	18.8389	19.0428	18.8336	18.9809	0.02673	18.9051	0.0973927	-0.0757781	0.348458
SYRC_MOUSE	Arginine--tRNA ligase, cytoplasmic	SYRC_MOUSE_Cys115	K.FGDYQCNSAMGISQMLK.A	19.0949	18.9536	19.1297	18.9944	19.1978	19.0374	19.0594	0.0761677	19.0765	0.0875285	0.0171461	0.844672
SYRC_MOUSE	Arginine--tRNA ligase, cytoplasmic	SYRC_MOUSE_Cys312	K.AWNLICDVSR.E	20.4271	20.8216	20.627	20.6034	20.6516	20.5575	20.6252	0.161058	20.6042	0.0383994	-0.0210435	0.866094
SYRC_MOUSE	Arginine--tRNA ligase, cytoplasmic	SYRC_MOUSE_Cys369	K.IVFVPGCSVPLTIVK.S	19.0901	19.0232	19.1609	19.0396	19.072	18.8313	19.0914	0.0562367	18.981	0.106659	-0.110403	0.265044
SYRC_MOUSE	Arginine--tRNA ligase, cytoplasmic	SYRC_MOUSE_Cys502	K.AAQTSVAYGCIK.Y	21.7215	21.7364	21.9975	21.8776	21.809	21.7839	21.8185	0.126744	21.8235	0.0395688	0.00505134	0.959673
SYRC_MOUSE	Arginine--tRNA ligase, cytoplasmic	SYRC_MOUSE_Cys638	R.MLLCEAVAAVMAK.G	16.3371	16.1768	16.1401	16.2169	16.2784	16.1963	16.218	0.0855642	16.2305	0.0348894	0.0125237	0.857336
SYSC_MOUSE	Serine--tRNA ligase, cytoplasmic	SYSC_MOUSE_Cys395	R.ELVSCSNC#TDYQAR.R	17.5431	17.7339	17.6509	17.4008	17.4124	17.5461	17.6426	0.0781453	17.4531	0.0659271	-0.189556	0.0586766
SYSC_MOUSE	Serine--tRNA ligase, cytoplasmic	SYSC_MOUSE_Cys431	K.MMDKVEFVHMLNATMCATTR.T	15.3825	15.6749	15.2816	15.0616	15.1385	15.305	15.4463	0.166773	15.1684	0.101582	-0.277961	0.114401
SYTC_MOUSE	Threonine--tRNA ligase, cytoplasmic	SYTC_MOUSE_Cys106	K.TTPYQIACGISQGLADNTVVAK.V	18.2463	17.9956	18.2117	18.3027	18.3843	18.0552	18.1512	0.11092	18.2474	0.139934	0.0962161	0.488499
SYTC_MOUSE	Threonine--tRNA ligase, cytoplasmic	SYTC_MOUSE_Cys342	R.DQELYFFHELSPGSCFFLPK.G	17.5142	17.5057	17.9002	17.5571	17.4787	17.5524	17.64	0.183994	17.5294	0.0358887	-0.110612	0.450961
SYVC_MOUSE	Valine--tRNA ligase	SYVC_MOUSE_Cys41	R.ICLQPPPSSR.T	20.9712	20.9238	21.1339	20.6807	20.8364	20.7727	21.0096	0.0900121	20.7633	0.0638929	-0.246351	0.0343089
SYVC_MOUSE	Valine--tRNA ligase	SYVC_MOUSE_Cys478	R.LVNWSCTLNSAISDIEVDKK.E	17.7863	17.58	18.1584	17.8	17.8571	17.4334	17.8415	0.239343	17.6968	0.187733	-0.144707	0.537959
SYVC_MOUSE	Valine--tRNA ligase	SYVC_MOUSE_Cys562	K.CVVHPFLSR.S	18.0403	17.8653	17.8683	17.8885	17.744	17.8575	17.9246	0.0817737	17.83	0.0621422	-0.0946456	0.262453
SYVC_MOUSE	Valine--tRNA ligase	SYVC_MOUSE_Cys662	R.GVKDNPMVVPLCNR.S	20.0168	20.0688	20.0762	19.9241	19.9158	19.8398	20.0539	0.026439	19.8932	0.0379017	-0.160701	0.00794154
SYVN1_MOUSE	E3 ubiquitin-protein ligase synoviolin	SYVN1_MOUSE_Cys326	R.QQTCPTC#R.M	16.5133	16.4636	16.7291	16.1811	16.2836	16.2571	16.5687	0.115219	16.2406	0.0434522	-0.328078	0.0196413
SYWC_MOUSE	Tryptophan--tRNA ligase, cytoplasmic	SYWC_MOUSE_Cys66	K.AGCPPGNPTAGR.N	16.4013	16.3184	16.2893	16.2205	16.2618	16.1736	16.3363	0.0474666	16.2186	0.0360377	-0.117732	0.0491249
T120A_MOUSE	Transmembrane protein 120A	T120A_MOUSE_Cys47	K.LQANCTNSITR.Q	18.6131	18.7759	18.814	18.5999	18.7508	18.6993	18.7343	0.0871124	18.6833	0.0626273	-0.0509986	0.538267
TACC1_MOUSE	Transforming acidic coiled-coil-containing protein 1	TACC1_MOUSE_Cys512	K.LASTSSCAQK.S	18.2311	18.0934	17.9576	17.7686	17.7352	17.678	18.0941	0.11165	17.7273	0.0373782	-0.366808	0.0116384
TADBP_MOUSE	TAR DNA-binding protein 43	TADBP_MOUSE_Cys50	R.YRNPVSQCMR.G	19.0184	18.8247	19.0934	19.4517	19.2576	19.1922	18.9788	0.113219	19.3005	0.110229	0.321664	0.0450658
TAGL2_MOUSE	Transgelin-2	TAGL2_MOUSE_Cys124	K.NMACVQR.T	16.4951	16.4248	16.5357	16.3547	16.3672	16.2694	16.4852	0.0458274	16.3305	0.0434703	-0.154721	0.0257219
TALDO_MOUSE	Transaldolase	TALDO_MOUSE_Cys250	K.ALAGCDFLTISPK.L	22.1492	22.2256	22.6247	22.2639	22.0844	22.1525	22.3332	0.208512	22.1669	0.0739679	-0.166224	0.347888
TBA1A_MOUSE	Tubulin alpha-1A chain	TBA1A_MOUSE_Cys295	K.AYHEQLSVAEITNACFEPANQMVK.C	17.2171	17.0791	16.894	17.0135	17.0217	16.9215	17.0634	0.132365	16.9856	0.0454328	-0.0778483	0.475452
TBA1A_MOUSE	Tubulin alpha-1A chain	TBA1A_MOUSE_Cys315	K.YMACCLLYR.G	23.0848	22.8671	22.8592	22.4187	22.5104	22.3717	22.937	0.104567	22.4336	0.0575916	-0.503459	0.00396847
TBA1A_MOUSE	Tubulin alpha-1A chain	TBA1A_MOUSE_Cys316	K.YMAC#CLLYR.G	22.7312	22.6387	22.5108	22.3398	22.3835	22.1783	22.6269	0.0903555	22.3005	0.0882612	-0.32639	0.0216873
TBA1A_MOUSE	Tubulin alpha-1A chain	TBA1A_MOUSE_Cys347	R.TIQFVDWCPTGFK.V	22.1536	22.1321	22.1687	21.9864	21.9559	21.8073	22.1515	0.015049	21.9165	0.078247	-0.234938	0.0140336
TBA1A_MOUSE	Tubulin alpha-1A chain	TBA1A_MOUSE_Cys376	R.AVCM*LSNTTAIAEAWAR.L	21.5803	21.4247	21.4964	21.3077	21.4301	21.1428	21.5004	0.0635937	21.2935	0.117735	-0.206908	0.0940347
TBA1B_MOUSE	Tubulin alpha-1B chain	TBA1B_MOUSE_Cys347	R.SIQFVDWCPTGFK.V	21.303	21.4279	21.4394	21.015	21.1921	21.1247	21.3901	0.0617575	21.1106	0.0729878	-0.279528	0.0144393
TBB2A_MOUSE	Tubulin beta-2A chain	TBB2A_MOUSE_Cys12	R.EIVHIQAGQCGNQIGAK.F	23.4803	23.1729	23.2948	23.0617	23.3303	23.0619	23.316	0.126371	23.1513	0.126604	-0.164701	0.262795
TBB2A_MOUSE	Tubulin beta-2A chain	TBB2A_MOUSE_Cys354	K.TAVCDIPPR.G	21.9191	21.8914	21.9785	21.6847	21.7537	21.6833	21.9297	0.0363045	21.7072	0.032871	-0.222418	0.00302119
TBB6_MOUSE	Tubulin beta-6 chain	TBB6_MOUSE_Cys12	R.EIVHIQAGQCGNQIGTK.F	17.5746	17.4764	17.2863	17.2205	17.046	17.0859	17.4458	0.119698	17.1175	0.0746842	-0.328344	0.0301801
TBC15_MOUSE	TBC1 domain family member 15	TBC15_MOUSE_Cys197	R.TLLVNCQNK.S	19.7637	19.6948	19.7887	19.3168	19.3694	19.2946	19.7491	0.0396872	19.327	0.0313566	-0.422116	0.000294962
TBCC_MOUSE	Tubulin-specific chaperone C	TBCC_MOUSE_Cys214	K.LCGNPNTLR.L	18.9097	18.8689	18.9614	18.7314	18.731	18.6897	18.9133	0.0378747	18.7174	0.019535	-0.195972	0.00288443
TBCD4_MOUSE	TBC1 domain family member 4	TBCD4_MOUSE_Cys74	R.SQKPDAGGCGAPAAR.E	12.6849	12.6553	12.7266	12.3861	12.5135	12.3329	12.689	0.0292747	12.4108	0.0757861	-0.278154	0.00838888
TBL2_MOUSE	Transducin beta-like protein 2	TBL2_MOUSE_Cys43	R.AEEKPSQPVCQK.E	16.0974	16.1134	16.0872	16.2339	16.2796	16.1835	16.0993	0.0107687	16.2323	0.0392504	0.132993	0.00987338
TCEA1_MOUSE	Transcription elongation factor A protein 1	TCEA1_MOUSE_Cys271	K.NCTYTQVQTR.S	17.6485	17.625	17.6055	17.5076	17.3715	17.4514	17.6263	0.0176131	17.4435	0.0558446	-0.182791	0.0115589
TCPA_MOUSE	T-complex protein 1 subunit alpha	TCPA_MOUSE_Cys147	R.DCLINAAK.T	21.0821	21.0542	21.1577	20.8182	20.8939	20.8639	21.098	0.0437011	20.8587	0.0311288	-0.239314	0.00322968
TCPA_MOUSE	T-complex protein 1 subunit alpha	TCPA_MOUSE_Cys218	R.SQIESMLINGYALNCVVGSQGMPK.R	17.9821	18.0411	17.9463	17.7464	17.9078	17.9988	17.9899	0.0390705	17.8843	0.104377	-0.105532	0.251563
TCPA_MOUSE	T-complex protein 1 subunit alpha	TCPA_MOUSE_Cys236	K.IACLDFSLQK.T	17.7963	18.0819	17.7399	17.8776	17.6904	17.6664	17.8727	0.14968	17.7448	0.0944501	-0.127922	0.364496
TCPA_MOUSE	T-complex protein 1 subunit alpha	TCPA_MOUSE_Cys76	K.VLCELADLQDKEVGDGTTSVVIIAAELLK.N	15.2822	15.4348	15.552	15.5652	15.4456	15.273	15.423	0.110465	15.4279	0.119974	0.00492396	0.967988
TCPB_MOUSE	T-complex protein 1 subunit beta	TCPB_MOUSE_Cys289	K.HGINCFINR.Q	19.4466	19.376	19.6274	19.5486	19.3238	19.4011	19.4833	0.105864	19.4245	0.093265	-0.0588232	0.587136
TCPD_MOUSE	T-complex protein 1 subunit delta	TCPD_MOUSE_Cys120	K.AQDIEAGDGTTSVVIIAGSLLDSCTK.L	18.0397	17.8857	18.2921	17.8244	17.9193	17.3742	18.0725	0.167521	17.706	0.237772	-0.366477	0.149356
TCPD_MOUSE	T-complex protein 1 subunit delta	TCPD_MOUSE_Cys252	K.IGLIQFCLSAPK.T	15.796	15.8255	16.1429	16.2003	16.0102	15.9151	15.9215	0.157006	16.0419	0.118594	0.120409	0.435623
TCPD_MOUSE	T-complex protein 1 subunit delta	TCPD_MOUSE_Cys295	K.TGCNVLLIQK.S	19.5677	19.4771	19.7752	19.3129	19.3701	19.2709	19.6067	0.124765	19.3179	0.0406559	-0.288716	0.0358173
TCPD_MOUSE	T-complex protein 1 subunit delta	TCPD_MOUSE_Cys379	K.ITGCTSPGK.T	21.8024	21.8377	22.1585	21.7669	21.834	21.7555	21.9329	0.160166	21.7854	0.0346383	-0.147419	0.272213
TCPD_MOUSE	T-complex protein 1 subunit delta	TCPD_MOUSE_Cys450	R.TLSGMESYCVR.A	20.2314	20.1603	20.5198	20.2182	20.3232	20.2423	20.3039	0.155467	20.2612	0.0449073	-0.0426081	0.728512
TCPE_MOUSE	T-complex protein 1 subunit epsilon	TCPE_MOUSE_Cys253	K.IAILTCPFEPPKPK.T	21.1072	20.8548	21.27	20.9038	20.8817	20.8425	21.0774	0.170803	20.876	0.0253795	-0.201361	0.174466
TCPE_MOUSE	T-complex protein 1 subunit epsilon	TCPE_MOUSE_Cys493	K.ESNPALGIDCLHK.G	14.8504	15.5753	14.755	14.6328	15.1315	14.9171	15.0603	0.366289	14.8938	0.204269	-0.166459	0.604547
TCPG_MOUSE	T-complex protein 1 subunit gamma	TCPG_MOUSE_Cys366	K.KIGDEYFTFITDCKDPK.A	16.7608	17.0104	16.8596	16.7858	16.7746	16.8025	16.8769	0.102633	16.7876	0.0114657	-0.0892782	0.288595
TCPG_MOUSE	T-complex protein 1 subunit gamma	TCPG_MOUSE_Cys398	R.NLQDAMQVCR.N	21.9082	21.8968	21.9876	21.8941	21.8299	21.8213	21.9309	0.0404087	21.8484	0.0324596	-0.0824478	0.087686
TCPH_MOUSE	T-complex protein 1 subunit eta	TCPH_MOUSE_Cys158	K.CAMTALSSK.L	23.1508	22.7785	22.8979	22.4062	22.5262	22.4756	22.9424	0.155228	22.4694	0.049174	-0.473063	0.0147486
TCPH_MOUSE	T-complex protein 1 subunit eta	TCPH_MOUSE_Cys310	K.LPIGDVATQYFADRDMFCAGR.V	18.1622	17.8291	18.45	18.1219	17.9575	18.1528	18.1471	0.253693	18.0774	0.0857279	-0.0696924	0.731482
TCPH_MOUSE	T-complex protein 1 subunit eta	TCPH_MOUSE_Cys364	R.YNFFTGCPK.A	21.373	21.7036	21.7225	21.4628	21.5303	21.3628	21.5997	0.160493	21.452	0.0687891	-0.147725	0.297592
TCPH_MOUSE	T-complex protein 1 subunit eta	TCPH_MOUSE_Cys450	R.QLCDNAGFDATNILNK.L	18.0213	17.992	18.2817	17.9329	17.9891	17.9514	18.0983	0.130203	17.9578	0.0233841	-0.140563	0.207339
TCPH_MOUSE	T-complex protein 1 subunit eta	TCPH_MOUSE_Cys511	R.INALTAASEAACLIVSVDETIK.N	19.8744	19.5265	19.9569	19.5409	19.4208	19.5281	19.786	0.186521	19.4966	0.0538776	-0.289374	0.102737
TCPQ_MOUSE	T-complex protein 1 subunit theta	TCPQ_MOUSE_Cys148	K.AHEILPELVCC#SAK.N	19.5426	19.4249	19.9397	19.6503	19.7657	19.7725	19.6357	0.220227	19.7295	0.0560731	0.0937784	0.59082
TCPQ_MOUSE	T-complex protein 1 subunit theta	TCPQ_MOUSE_Cys149	K.AHEILPELVC#CSAK.N	18.9155	18.8375	19.1223	18.7471	18.8501	18.5793	18.9584	0.120173	18.7255	0.111627	-0.232946	0.114992
TCPQ_MOUSE	T-complex protein 1 subunit theta	TCPQ_MOUSE_Cys187	K.LIAQACVSIFPDSGNFNVDNIR.V	17.9999	18.0613	17.3258	18.0588	17.4105	17.5167	17.7957	0.333192	17.662	0.283895	-0.133688	0.688069
TCPQ_MOUSE	T-complex protein 1 subunit theta	TCPQ_MOUSE_Cys244	K.IAVYSCPFDGMITETK.G	20.1489	19.7657	20.1257	19.662	19.7606	19.499	20.0134	0.175432	19.6405	0.107867	-0.372905	0.0625874
TCPQ_MOUSE	T-complex protein 1 subunit theta	TCPQ_MOUSE_Cys430	K.QITSYGETCPGLEQYAIK.K	18.4732	18.4516	18.2352	18.5096	18.1659	17.7671	18.3867	0.107474	18.1475	0.303427	-0.239158	0.35268
TCPZ_MOUSE	T-complex protein 1 subunit zeta	TCPZ_MOUSE_Cys282	K.VCGDSDKGFVVINQK.G	22.2374	22.3727	22.6324	22.3342	22.2254	22.3761	22.4142	0.163904	22.3119	0.0634927	-0.102278	0.456793
TCTP_MOUSE	Translationally-controlled tumor protein	TCTP_MOUSE_Cys28	K.IREIADGLCLEVEGK.M	17.5016	17.5074	17.2441	17.4951	17.3835	17.415	17.4177	0.122778	17.4312	0.0470039	0.0134426	0.892017
TEBP_MOUSE	Prostaglandin E synthase 3	TEBP_MOUSE_Cys40	K.LTFSCLGGSDNFK.H	16.0627	16.0097	15.0423	15.6549	15.8609	15.7287	15.7049	0.469053	15.7481	0.0852182	0.0432563	0.90409
TERA_MOUSE	Transitional endoplasmic reticulum ATPase	TERA_MOUSE_Cys522	K.GVLFYGPPGCGK.T	21.6404	21.6129	21.8912	21.6576	21.5225	21.4949	21.7148	0.12519	21.5583	0.0711019	-0.156488	0.199071
TERA_MOUSE	Transitional endoplasmic reticulum ATPase	TERA_MOUSE_Cys572	R.QAAPCVLFFDELDSIAK.A	18.0079	18.3518	18.3155	18.3968	18.4068	18.4805	18.2251	0.154307	18.4281	0.0373347	0.202987	0.144853
TERA_MOUSE	Transitional endoplasmic reticulum ATPase	TERA_MOUSE_Cys691	K.MTNGFSGADLTEICQR.A	18.3448	18.424	18.3386	18.1782	18.1929	18.211	18.3691	0.0388938	18.194	0.0134359	-0.175066	0.00384326
TFR1_MOUSE	Transferrin receptor protein 1	TFR1_MOUSE_Cys355	K.MEGSCPAR.W	16.392	16.3589	16.1743	16.0875	16.2251	16.0426	16.3084	0.0957763	16.1184	0.0776543	-0.189994	0.0948355
TFR1_MOUSE	Transferrin receptor protein 1	TFR1_MOUSE_Cys365	R.WNIDSSCK.L	22.1824	22.1461	21.6396	21.9663	21.9736	21.8341	21.9894	0.247749	21.9247	0.0641131	-0.0646613	0.738899
TGM2_MOUSE	Protein-glutamine gamma-glutamyltransferase 2	TGM2_MOUSE_Cys669	K.LVVNFQCDK.L	19.5534	19.9335	19.7686	19.7433	19.5379	19.7115	19.7518	0.155659	19.6642	0.0902578	-0.0875961	0.529005
THEM6_MOUSE	Protein THEM6	THEM6_MOUSE_Cys104	R.DLNAHTVLAASCAR.Y	14.3965	14.8093	14.3297	14.2096	14.2651	14.4335	14.5119	0.212114	14.3027	0.095204	-0.209134	0.272265
THIL_MOUSE	Acetyl-CoA acetyltransferase, mitochondrial	THIL_MOUSE_Cys123	K.VCASGMK.A	21.684	21.6672	21.9106	21.3646	21.4169	21.3082	21.754	0.111008	21.3633	0.0443921	-0.390695	0.00986981
THIL_MOUSE	Acetyl-CoA acetyltransferase, mitochondrial	THIL_MOUSE_Cys193	K.IHMGNCAENTAK.K	18.9141	18.8119	18.8643	18.5755	18.4377	18.3674	18.8634	0.041709	18.4602	0.0864604	-0.403213	0.00402759
THIO_MOUSE	Thioredoxin	THIO_MOUSE_Cys32	K.LVVVDFSATWCGPCK.M	20.8607	20.6079	20.7622	20.5813	20.587	20.3939	20.7436	0.104071	20.5208	0.0897125	-0.222844	0.0835209
THIO_MOUSE	Thioredoxin	THIO_MOUSE_Cys35	K.LVVVDFSATWC#GPCK.M	21.218	21.0039	21.2787	21.146	21.0201	20.9685	21.1669	0.117855	21.0448	0.0745477	-0.12206	0.283468
THIO_MOUSE	Thioredoxin	THIO_MOUSE_Cys46	K.MIKPFFHSLCDK.Y	17.2761	16.9225	16.9079	17.4786	17.2447	17.1017	17.0355	0.170206	17.275	0.155368	0.239501	0.215576
THIO_MOUSE	Thioredoxin	THIO_MOUSE_Cys73	K.CMPTFQFYK.K	23.3948	22.8143	22.8489	22.7995	22.8599	22.8306	23.0194	0.265864	22.83	0.0246345	-0.189355	0.372639
THMS2_MOUSE	Protein THEMIS2	THMS2_MOUSE_Cys382	R.SGQVCGTK.G	17.1495	17.1833	17.0628	16.8332	16.7232	16.8367	17.1319	0.0507406	16.7977	0.0526766	-0.334134	0.00295568
THMS2_MOUSE	Protein THEMIS2	THMS2_MOUSE_Cys571	K.QQNIQSCK.E	19.0147	19.0963	18.9552	18.6305	18.5384	18.692	19.022	0.0578565	18.6203	0.0631261	-0.401763	0.0026769
TIF1B_MOUSE	Transcription intermediary factor 1-beta	TIF1B_MOUSE_Cys233	R.DCQLNAHK.D	19.5185	19.5507	19.7169	19.8732	19.7213	19.7063	19.5954	0.0869491	19.7669	0.0754009	0.171532	0.102746
TIM10_MOUSE	Mitochondrial import inner membrane translocase subunit Tim10	TIM10_MOUSE_Cys33	K.CVPPHYK.E	19.3432	19.2571	19.1958	19.0407	19.1506	18.9647	19.2654	0.0604905	19.052	0.0763381	-0.213387	0.0362798
TKT_MOUSE	Transketolase	TKT_MOUSE_Cys133	K.QAFTDVATGSLGQGLGAACGMAYTGK.Y	20.2834	20.2251	20.2328	20.0171	20.2438	20.0234	20.2471	0.0258527	20.0948	0.105414	-0.152336	0.118137
TLN1_MOUSE	Talin-1	TLN1_MOUSE_Cys1023	K.ASVPTIQDQASAM*QLSQCAK.N	16.7349	16.7284	16.6205	16.2971	16.3314	16.3337	16.6946	0.052455	16.3207	0.0167285	-0.373895	0.000657075
TLN1_MOUSE	Talin-1	TLN1_MOUSE_Cys1045	K.AQEACGPLEMDSALSVVQNLEK.D	17.4142	17.664	17.7513	17.6617	17.6792	17.3919	17.6098	0.142831	17.5776	0.131501	-0.0322218	0.825958
TLN1_MOUSE	Talin-1	TLN1_MOUSE_Cys1087	K.LKPLPGETMEKCTQDLGNSTK.A	18.9906	18.8495	18.9794	18.5378	18.7034	18.5439	18.9398	0.0640479	18.595	0.0766476	-0.344804	0.00814953
TLN1_MOUSE	Talin-1	TLN1_MOUSE_Cys116	K.TVTDMLMTICAR.I	21.8027	21.6901	21.8946	21.6881	21.7433	21.6686	21.7958	0.083607	21.7	0.031638	-0.0957743	0.204306
TLN1_MOUSE	Talin-1	TLN1_MOUSE_Cys1199	R.CVSC#LPGQR.D	19.99	19.9547	20.1322	19.7592	19.8059	19.6866	20.0257	0.0767145	19.7506	0.049081	-0.275106	0.0129296
TLN1_MOUSE	Talin-1	TLN1_MOUSE_Cys1353	R.AVTDSINQLITMCTQQAPGQK.E	19.3609	19.0537	19.9532	19.2888	19.4635	19.494	19.4559	0.373339	19.4154	0.0903858	-0.0405145	0.888645
TLN1_MOUSE	Talin-1	TLN1_MOUSE_Cys1661	K.APGQLECETAIAALNSCLR.D	17.0914	16.9246	17.1632	17.5841	17.2224	16.8031	17.0597	0.0999203	17.2032	0.319142	0.143466	0.576801
TLN1_MOUSE	Talin-1	TLN1_MOUSE_Cys1671	K.APGQLECETAIAALNSCLR.D	17.0914	16.9246	17.1632	17.2172	16.8567	16.8031	17.0597	0.0999203	16.959	0.183882	-0.100716	0.533479
TLN1_MOUSE	Talin-1	TLN1_MOUSE_Cys1927	R.VQELGHGCSALVTK.A	19.8348	19.9748	19.8374	19.7034	19.6894	19.5632	19.8823	0.065391	19.652	0.0630337	-0.2303	0.0230453
TLN1_MOUSE	Talin-1	TLN1_MOUSE_Cys1939	K.AGALQCSPSDVYTK.K	20.5152	20.5704	20.7165	20.5814	20.624	20.4177	20.6007	0.0849097	20.541	0.088908	-0.0596629	0.530228
TLN1_MOUSE	Talin-1	TLN1_MOUSE_Cys2161	R.QELAVFCSPEPPAK.T	18.2816	18.6398	18.5099	18.6186	18.3421	18.3467	18.4771	0.148059	18.4358	0.129261	-0.0412752	0.781258
TLN1_MOUSE	Talin-1	TLN1_MOUSE_Cys2219	R.ACKEAAFHPEVAPDVR.L	15.409	15.2825	15.8521	15.1042	15.4077	15.6318	15.5145	0.244228	15.3812	0.21622	-0.133318	0.594237
TLN1_MOUSE	Talin-1	TLN1_MOUSE_Cys236	K.ACEFAGFQC#QIQFGPHNEQK.H	16.8431	16.5105	17.1754	16.7565	16.7678	16.5819	16.843	0.271432	16.7021	0.0851172	-0.140946	0.522103
TLN1_MOUSE	Talin-1	TLN1_MOUSE_Cys2442	K.QVAASTAQLLVACK.V	19.0589	18.9837	19.0075	18.8815	18.9102	18.9427	19.0167	0.0313607	18.9115	0.0250253	-0.10522	0.0206756
TLN1_MOUSE	Talin-1	TLN1_MOUSE_Cys29	K.TMQFEPSTMVYDACR.M	18.3021	18.2931	18.2729	18.1188	17.9954	18.0089	18.2893	0.012194	18.041	0.0552654	-0.248318	0.00343142
TLN1_MOUSE	Talin-1	TLN1_MOUSE_Cys719	R.TEDSGLQTQVIAAATQC#ALSTSQLVACTK.V	14.7246	14.1554	14.7705	14.7454	14.7562	14.6954	14.5501	0.279765	14.7323	0.0264619	0.182206	0.411049
TLN1_MOUSE	Talin-1	TLN1_MOUSE_Cys732	K.VVAPTISSPVCQEQLVEAGR.L	17.5467	17.27	17.6787	17.6878	17.2396	17.4159	17.4985	0.170274	17.4478	0.184379	-0.0506804	0.78938
TLN1_MOUSE	Talin-1	TLN1_MOUSE_Cys956	K.ASAGPQPLLVQSCK.A	18.6787	18.7383	19.0016	18.7451	18.6331	18.6617	18.8062	0.140282	18.68	0.0475082	-0.126236	0.294491
TLN2_MOUSE	Talin-2	TLN2_MOUSE_Cys2108	K.AVAAGNSCRQEDVIATANLSR.K	15.9608	15.7298	16.2263	15.8304	15.7998	16.0693	15.9723	0.202868	15.8999	0.120466	-0.0724245	0.686599
TLR13_MOUSE	Toll-like receptor 13	TLR13_MOUSE_Cys527	K.LQSLILSHNCLK.I	17.8345	17.7078	17.999	17.847	17.6553	17.6389	17.8471	0.119236	17.7137	0.0944608	-0.13336	0.282808
TLR9_MOUSE	Toll-like receptor 9	TLR9_MOUSE_Cys791	K.CGSPGQLQGR.S	16.1501	16.0643	16.261	15.3168	15.6228	15.5213	16.1585	0.0805463	15.487	0.127244	-0.671474	0.00323361
TM9S2_MOUSE	Transmembrane 9 superfamily member 2	TM9S2_MOUSE_Cys173	K.FCNPGFPIGCYITDK.G	19.3398	19.438	19.2902	19.2572	19.3072	19.1538	19.356	0.0614016	19.2394	0.0638955	-0.116603	0.136265
TM9S2_MOUSE	Transmembrane 9 superfamily member 2	TM9S2_MOUSE_Cys181	K.FCNPGFPIGCYITDK.G	19.3398	19.438	19.2902	19.2572	19.3072	19.1538	19.356	0.0614016	19.2394	0.0638955	-0.116603	0.136265
TM9S2_MOUSE	Transmembrane 9 superfamily member 2	TM9S2_MOUSE_Cys249	K.HTHIDKPDCSGPAMDISNK.A	15.4301	15.1941	14.9564	13.746	15.0387	14.5579	15.1935	0.193386	14.4475	0.533461	-0.745981	0.136524
TM9S2_MOUSE	Transmembrane 9 superfamily member 2	TM9S2_MOUSE_Cys47	A.FYLPGLAPVNFCAEEK.S	20.9392	20.8612	20.7415	20.7291	20.6674	20.6444	20.8473	0.0812827	20.6803	0.0357704	-0.16702	0.0564038
TM9S2_MOUSE	Transmembrane 9 superfamily member 2	TM9S2_MOUSE_Cys83	R.LDSVESVLPYEYTAFDFCQASEGK.R	18.0728	18.2849	18.0241	18.0032	18.006	17.8216	18.1273	0.113203	17.9436	0.0862892	-0.183695	0.142034
TM9S3_MOUSE	Transmembrane 9 superfamily member 3	TM9S3_MOUSE_Cys426	R.NLSGQPNFPCR.V	20.2735	20.3029	20.2094	19.9326	20.1003	19.9808	20.262	0.0390404	20.0046	0.0704926	-0.257416	0.0106772
TM9S3_MOUSE	Transmembrane 9 superfamily member 3	TM9S3_MOUSE_Cys64	K.YFSLPFCVGSK.K	20.2268	20.1119	20.0111	19.7193	19.9603	19.5964	20.1166	0.0881344	19.7587	0.151109	-0.357906	0.0444097
TM9S4_MOUSE	Transmembrane 9 superfamily member 4	TM9S4_MOUSE_Cys64	R.TQLPYEYYSLPFCQPIK.I	18.8416	18.6932	18.6978	18.3564	18.7939	18.0768	18.7442	0.0688813	18.409	0.29513	-0.335143	0.192881
TMED9_MOUSE	Transmembrane emp24 domain-containing protein 9	TMED9_MOUSE_Cys49	K.CFIEEIPDETMVIGNYR.T	19.4293	19.2931	19.0579	19.2028	19.0731	18.981	19.2601	0.153384	19.0856	0.0909628	-0.174482	0.238651
TMLH_MOUSE	Trimethyllysine dioxygenase, mitochondrial	TMLH_MOUSE_Cys85	R.SASCYNSK.T	15.4352	15.4739	15.4535	14.9962	15.1282	15.0205	15.4542	0.0158006	15.0483	0.0573457	-0.405899	0.000644937
TMX1_MOUSE	Thioredoxin-related transmembrane protein 1	TMX1_MOUSE_Cys268	R.CVGLPSATDTS.-	13.8113	13.9207	14.0427	13.4357	13.7428	13.6868	13.9249	0.0945274	13.6218	0.13356	-0.303099	0.0588203
TNPO1_MOUSE	Transportin-1	TNPO1_MOUSE_Cys164	K.ICEDSAEILDSDVLDRPLNIMIPK.F	15.9208	16.0243	16.0258	15.9141	16.1858	16.1499	15.9903	0.0491425	16.0833	0.120506	0.0929317	0.369685
TNPO1_MOUSE	Transportin-1	TNPO1_MOUSE_Cys683	R.SNILTLMYQCMQDK.M	19.77	19.858	19.8297	19.504	19.5146	19.4944	19.8192	0.0366991	19.5044	0.00825855	-0.31489	0.000291478
TNPO1_MOUSE	Transportin-1	TNPO1_MOUSE_Cys706	K.ACFQHVK.P	18.4755	18.6549	18.6304	18.3481	18.3422	18.3898	18.5869	0.0794385	18.36	0.0211663	-0.226872	0.0175007
TNPO3_MOUSE	Transportin-3	TNPO3_MOUSE_Cys303	R.IFTELCETFLEK.I	15.4465	15.694	15.838	15.4417	15.4445	15.417	15.6595	0.16171	15.4344	0.0123549	-0.225131	0.121119
TNPO3_MOUSE	Transportin-3	TNPO3_MOUSE_Cys634	R.HTNPIVENGQTHPCQK.V	13.0568	13.574	13.4153	13.3953	13.1773	13.505	13.3487	0.216356	13.3592	0.136194	0.0104488	0.95668
TPC12_MOUSE	Trafficking protein particle complex subunit 12	TPC12_MOUSE_Cys725	R.MDPTNAVANNNAAVCLLYLGK.L	17.802	17.3456	17.6605	17.3254	17.714	17.4663	17.6027	0.190773	17.5019	0.160611	-0.100826	0.598072
TPIS_MOUSE	Triosephosphate isomerase	TPIS_MOUSE_Cys117	K.IAVAAQNCYK.V	22.2809	22.4227	22.6372	22.2674	22.0558	22.3549	22.4469	0.146432	22.226	0.125539	-0.220891	0.180632
TPIS_MOUSE	Triosephosphate isomerase	TPIS_MOUSE_Cys268	R.IIYGGSVTGATCK.E	19.9625	19.9205	19.8125	19.7414	19.6508	19.5829	19.8985	0.0631905	19.6584	0.0649103	-0.240137	0.0199671
TPP2_MOUSE	Tripeptidyl-peptidase 2	TPP2_MOUSE_Cys1138	K.STLIDALCRK.G	19.1281	19.0168	19.353	18.9977	18.8792	18.9696	19.166	0.139844	18.9488	0.050558	-0.217138	0.107833
TRFE_MOUSE	Serotransferrin	TRFE_MOUSE_Cys137	K.KSCHTGLGR.S	15.1808	15.1889	15.0216	15.4137	15.1806	15.014	15.1304	0.0770027	15.2028	0.163923	0.0723228	0.602413
TRM2A_MOUSE	tRNA (uracil-5-)-methyltransferase homolog A	TRM2A_MOUSE_Cys214	K.ACCPLEGVKPSPQQTEYR.N	19.0399	18.9446	18.972	18.882	18.8408	18.804	18.9855	0.0400355	18.8423	0.0318315	-0.143228	0.0166749
TRM2A_MOUSE	tRNA (uracil-5-)-methyltransferase homolog A	TRM2A_MOUSE_Cys215	K.ACCPLEGVKPSPQQTEYR.N	16.4113	16.6547	16.4017	16.4915	16.1833	16.2349	16.4892	0.117079	16.3032	0.134777	-0.185992	0.214658
TRXR2_MOUSE	Thioredoxin reductase 2, mitochondrial	TRXR2_MOUSE_Cys86	K.WGLGGTCVNVGC#IPK.K	18.4635	18.1917	18.5102	18.094	18.303	17.9414	18.3885	0.140412	18.1128	0.148248	-0.275666	0.128855
TSN14_MOUSE	Tetraspanin-14	TSN14_MOUSE_Cys200	K.VVNTQCGYDVR.I	19.368	19.2188	19.5702	19.06	18.9218	19.0723	19.3857	0.143981	19.018	0.0682277	-0.36761	0.0309946
TSN31_MOUSE	Tetraspanin-31	TSN31_MOUSE_Cys157	K.SSTCQMCGER.F	14.8539	14.9121	14.6382	14.5768	14.6455	14.6347	14.8014	0.117799	14.619	0.0301605	-0.182366	0.101234
TSN31_MOUSE	Tetraspanin-31	TSN31_MOUSE_Cys160	K.SSTCQMCGER.F	14.8539	14.9121	14.6382	14.5768	14.6455	14.6347	14.8014	0.117799	14.619	0.0301605	-0.182366	0.101234
TXD12_MOUSE	Thioredoxin domain-containing protein 12	TXD12_MOUSE_Cys64	K.SWCGACK.A	21.2581	21.3437	21.0337	21.0633	20.9549	20.7532	21.2118	0.130727	20.9238	0.128493	-0.288022	0.0903966
TXD12_MOUSE	Thioredoxin domain-containing protein 12	TXD12_MOUSE_Cys67	K.SWCGACK.A	21.2581	21.3437	21.0337	21.0633	20.9549	20.7532	21.2118	0.130727	20.9238	0.128493	-0.288022	0.0903966
TXND5_MOUSE	Thioredoxin domain-containing protein 5	TXND5_MOUSE_Cys107	K.VDCTADSDVCSAQGVR.G	16.8186	16.7124	16.439	16.4121	16.3795	16.2389	16.6567	0.159873	16.3435	0.0751609	-0.313145	0.0662816
TXND5_MOUSE	Thioredoxin domain-containing protein 5	TXND5_MOUSE_Cys114	K.VDCTADSDVCSAQGVR.G	16.8186	16.7124	16.439	16.4121	16.3795	16.2389	16.6567	0.159873	16.3435	0.0751609	-0.313145	0.0662816
TXND5_MOUSE	Thioredoxin domain-containing protein 5	TXND5_MOUSE_Cys203	K.FFAPWCGHCK.A	15.5519	15.4266	15.4489	14.9762	15.0894	14.9303	15.4758	0.0545652	14.9986	0.0668717	-0.477174	0.00144432
TXND5_MOUSE	Thioredoxin domain-containing protein 5	TXND5_MOUSE_Cys206	K.FFAPWCGHCK.A	15.5519	15.4266	15.4489	14.9762	15.0894	14.9303	15.4758	0.0545652	14.9986	0.0668717	-0.477174	0.00144432
TXND5_MOUSE	Thioredoxin domain-containing protein 5	TXND5_MOUSE_Cys335	K.FYAPWCGHCK.N	19.6469	19.6621	19.1713	19.2607	18.9627	18.8895	19.4935	0.227851	19.0376	0.160526	-0.455828	0.0817756
TXND5_MOUSE	Thioredoxin domain-containing protein 5	TXND5_MOUSE_Cys338	K.FYAPWCGHCK.N	19.6469	19.6621	19.1713	19.2607	18.9627	18.8895	19.4935	0.227851	19.0376	0.160526	-0.455828	0.0817756
TXND5_MOUSE	Thioredoxin domain-containing protein 5	TXND5_MOUSE_Cys366	K.EFPGLSDVTIAEVDCTAER.N	19.4671	19.3161	19.3602	19.1947	19.2927	19.355	19.3811	0.0634007	19.2808	0.0659883	-0.100345	0.1959
U2AF2_MOUSE	Splicing factor U2AF 65 kDa subunit	U2AF2_MOUSE_Cys442	K.IFVEFTSVFDCQK.A	16.2676	16.2075	16.6699	16.4285	16.4617	16.3771	16.3817	0.205249	16.4224	0.0347927	0.0407692	0.795535
UB2D1_MOUSE	Ubiquitin-conjugating enzyme E2 D1	UB2D1_MOUSE_Cys85	K.IYHPNINSNGSICLDILR.S	22.7798	22.7414	22.8222	22.5796	22.4913	22.3125	22.7812	0.0330043	22.4611	0.111089	-0.320006	0.0174656
UB2D2_MOUSE	Ubiquitin-conjugating enzyme E2 D2	UB2D2_MOUSE_Cys107	K.VLLSICSLLC#DPNPDDPLVPEIAR.I	16.6664	17.967	18.6488	18.2548	18.4737	18.094	17.7607	0.822335	18.2742	0.155597	0.513427	0.434575
UB2L3_MOUSE	Ubiquitin-conjugating enzyme E2 L3	UB2L3_MOUSE_Cys86	K.GQVCLPVISAENWKPATK.T	23.7997	23.7901	23.5148	23.6611	23.5302	23.4663	23.7015	0.132105	23.5525	0.0810858	-0.149028	0.245527
UBA1_MOUSE	Ubiquitin-like modifier-activating enzyme 1	UBA1_MOUSE_Cys179	R.VGEFCHSR.G	18.2702	18.0962	18.1538	17.9065	17.8722	17.833	18.1734	0.0723444	17.8705	0.0300432	-0.302861	0.00544251
UBA1Y_MOUSE	Ubiquitin-like modifier-activating enzyme 1 Y	UBA1Y_MOUSE_Cys631	K.SIPICTLK.N	25.2986	24.9521	25.2236	24.8141	24.8248	24.8513	25.1581	0.148825	24.8301	0.0156538	-0.328013	0.036226
UBA6_MOUSE	Ubiquitin-like modifier-activating enzyme 6	UBA6_MOUSE_Cys721	K.ALQLLHCFPLETR.L	17.2105	17.5225	17.3024	17.2765	17.4597	17.046	17.3451	0.130909	17.2607	0.169261	-0.0844129	0.606662
UBC12_MOUSE	NEDD8-conjugating enzyme Ubc12	UBC12_MOUSE_Cys47	K.TCDISFSDPDDLLNFK.L	18.4166	18.1519	18.7147	18.201	18.6024	18.5073	18.4277	0.229914	18.4369	0.171257	0.00915146	0.966157
UBC9_MOUSE	SUMO-conjugating enzyme UBC9	UBC9_MOUSE_Cys43	K.NPDGTMNLMNWECAIPGKK.G	17.5951	17.3553	17.5724	17.6722	17.3235	17.1785	17.5076	0.108091	17.3914	0.207189	-0.116236	0.520582
UBE2A_MOUSE	Ubiquitin-conjugating enzyme E2 A	UBE2A_MOUSE_Cys88	K.MFHPNVYADGSICLDILQNR.W	18.1367	17.9975	18.2717	17.9608	17.6058	17.2646	18.1353	0.111935	17.6104	0.284226	-0.524925	0.071967
UBE2C_MOUSE	Ubiquitin-conjugating enzyme E2 C	UBE2C_MOUSE_Cys114	K.FLTPC#YHPNVDTQGNICLDILK.D	17.8627	17.5452	17.8092	17.1237	17.0545	16.9875	17.739	0.13879	17.0552	0.0556405	-0.683759	0.00294526
UBE2C_MOUSE	Ubiquitin-conjugating enzyme E2 C	UBE2C_MOUSE_Cys23	R.KGAEPCGGAAR.G	12.9243	12.9175	12.9399	12.2066	12.1504	12.1874	12.9272	0.00939573	12.1815	0.0233221	-0.745792	1.93058e-06
UBE2K_MOUSE	Ubiquitin-conjugating enzyme E2 K	UBE2K_MOUSE_Cys170	K.KIENLCAMGFDR.N	18.0869	17.7077	17.951	17.7407	17.6706	17.616	17.9152	0.156886	17.6758	0.051042	-0.239436	0.109387
UBE2K_MOUSE	Ubiquitin-conjugating enzyme E2 K	UBE2K_MOUSE_Cys92	N.ISSVTGAICLDILK.D	16.636	16.5284	16.9528	16.4858	16.5885	16.6277	16.7058	0.18012	16.5673	0.0598489	-0.13841	0.360678
UBE2N_MOUSE	Ubiquitin-conjugating enzyme E2 N	UBE2N_MOUSE_Cys87	R.ICLDILKDKWSPALQIR.T	19.2319	18.3317	18.3948	17.9662	18.6736	17.6152	18.6528	0.410274	18.085	0.440191	-0.567823	0.25294
UBE2Z_MOUSE	Ubiquitin-conjugating enzyme E2 Z	UBE2Z_MOUSE_Cys102	R.TAPQCLLR.I	19.2428	19.1975	19.4011	19.0667	19.1483	19.0376	19.2805	0.0872594	19.0842	0.0468446	-0.196298	0.0486617
UBE3A_MOUSE	Ubiquitin-protein ligase E3A	UBE3A_MOUSE_Cys853	R.LPTSHTCFNVLLLPEYSSK.E	19.3186	18.8589	19.3589	18.8829	18.9626	18.6424	19.1788	0.226828	18.8293	0.136113	-0.349534	0.135044
UBP14_MOUSE	Ubiquitin carboxyl-terminal hydrolase 14	UBP14_MOUSE_Cys359	K.FPLMLDVYELCTPELQEK.M	17.1993	17.3721	17.1171	16.8092	17.2222	16.3544	17.2295	0.106269	16.7953	0.354423	-0.434268	0.172291
UBP15_MOUSE	Ubiquitin carboxyl-terminal hydrolase 15	UBP15_MOUSE_Cys139	K.LCENGNMNNVVTR.R	16.8389	16.8493	16.6291	16.4238	16.4304	16.5036	16.7724	0.10142	16.4526	0.0361386	-0.319848	0.013682
UBP19_MOUSE	Ubiquitin carboxyl-terminal hydrolase 19	UBP19_MOUSE_Cys378	R.LHPGCGPHTIFR.W	14.6594	14.4353	13.6609	13.8318	14.1262	14.3734	14.2519	0.427789	14.1104	0.22139	-0.141429	0.699276
UBP5_MOUSE	Ubiquitin carboxyl-terminal hydrolase 5	UBP5_MOUSE_Cys532	R.AQVPFSSCLEAYGAPEQVDDFWSTALQAK.S	13.5525	13.2829	13.6426	13.6312	13.8715	13.42	13.4927	0.152838	13.6409	0.184475	0.148213	0.430996
UBR7_MOUSE	Putative E3 ubiquitin-protein ligase UBR7	UBR7_MOUSE_Cys101	R.CDCGNSK.F	14.5346	14.6372	13.9711	13.8807	13.9342	13.7906	14.381	0.292838	13.8685	0.0592601	-0.512453	0.0723206
UBR7_MOUSE	Putative E3 ubiquitin-protein ligase UBR7	UBR7_MOUSE_Cys46	K.CSYSQGSVGR.Q	15.1113	15.1071	14.8842	14.6989	14.7221	14.7261	15.0342	0.106099	14.7157	0.0120058	-0.318522	0.0134913
UBR7_MOUSE	Putative E3 ubiquitin-protein ligase UBR7	UBR7_MOUSE_Cys99	R.CDCGNSK.F	14.5346	14.6372	13.9711	13.8807	13.9342	13.7906	14.381	0.292838	13.8685	0.0592601	-0.512453	0.0723206
UD17C_MOUSE	UDP-glucuronosyltransferase 1-7C	UD17C_MOUSE_Cys125	K.GFFELLFSHCR.S	15.195	15.2371	15.3506	15.0202	14.4769	14.8977	15.2609	0.0657267	14.7983	0.232682	-0.462606	0.0537711
UFC1_MOUSE	Ubiquitin-fold modifier-conjugating enzyme 1	UFC1_MOUSE_Cys116	R.GGKICLTDHFKPLWAR.N	19.7622	19.5823	19.3867	19.2694	19.2926	18.9718	19.5771	0.153323	19.1779	0.14608	-0.399135	0.0560726
UFL1_MOUSE	E3 UFM1-protein ligase 1	UFL1_MOUSE_Cys707	R.CVPQIIAFLHSK.I	16.3132	16.4084	16.51	16.4292	16.3941	16.2489	16.4106	0.0803412	16.3574	0.0780467	-0.0531165	0.539181
UGGG1_MOUSE	UDP-glucose:glycoprotein glucosyltransferase 1	UGGG1_MOUSE_Cys1386	R.DFNLDGAPYGYTPFCDSR.R	17.1068	17.028	16.8546	16.7163	16.8933	16.8226	16.9965	0.105358	16.8107	0.0727127	-0.185735	0.109456
UGGG1_MOUSE	UDP-glucose:glycoprotein glucosyltransferase 1	UGGG1_MOUSE_Cys1493	K.TIDLCNNPM*TK.E	17.7336	18.1752	18.0257	17.6316	17.842	17.7448	17.9782	0.183413	17.7394	0.0859796	-0.238716	0.170923
UGGG1_MOUSE	UDP-glucose:glycoprotein glucosyltransferase 1	UGGG1_MOUSE_Cys880	R.MDFILSHALYCR.D	16.2265	16.5461	16.3579	16.4437	16.2113	16.4295	16.3768	0.131163	16.3615	0.106405	-0.0153136	0.904159
UROK_MOUSE	Urokinase-type plasminogen activator	UROK_MOUSE_Cys169	K.KPSSSVDQQGFQCGQK.A	17.8462	17.9472	17.7123	17.9991	17.9848	17.8874	17.8353	0.0962255	17.9571	0.0496322	0.121853	0.186685
UROK_MOUSE	Urokinase-type plasminogen activator	UROK_MOUSE_Cys347	K.LVSHEQCMQPHYYGSEINYK.M	14.0312	13.6119	13.187	13.8329	13.7926	13.4448	13.61	0.344631	13.6901	0.174235	0.0800258	0.784047
URP2_MOUSE	Fermitin family homolog 3	URP2_MOUSE_Cys403	K.GCEVVPDVNVSGQK.F	18.4186	18.3052	18.5009	18.1255	18.2141	18.0607	18.4082	0.0802255	18.1334	0.06285	-0.274801	0.0188862
USO1_MOUSE	General vesicular transport factor p115	USO1_MOUSE_Cys802	K.SQLCSQSLEITR.L	18.6183	18.5661	18.7053	18.5949	18.6012	18.5013	18.6299	0.0574093	18.5658	0.0456858	-0.0641351	0.284005
VA0D1_MOUSE	V-type proton ATPase subunit d 1	VA0D1_MOUSE_Cys244	K.LFPHCGR.L	15.7483	15.9442	15.8754	15.6863	15.6612	15.7056	15.8559	0.0811617	15.6844	0.0181733	-0.171575	0.0433566
VAPA_MOUSE	Vesicle-associated membrane protein-associated protein A	VAPA_MOUSE_Cys179	R.KLMEECKR.L	18.4312	18.6633	19.2176	19.3159	18.9837	19.0718	18.7707	0.3299	19.1238	0.140535	0.353143	0.236118
VATB2_MOUSE	V-type proton ATPase subunit B, brain isoform	VATB2_MOUSE_Cys162	R.GPVVLAEDFLDIMGQPINPQCR.I	17.3158	17.2021	17.787	17.2277	17.4104	17.1792	17.435	0.253195	17.2724	0.0995528	-0.162558	0.445694
VATH_MOUSE	V-type proton ATPase subunit H	VATH_MOUSE_Cys312	R.QEYALAMIQCK.V	20.435	20.3616	20.3716	20.0991	20.1375	19.9978	20.3894	0.0324889	20.0782	0.0589362	-0.311226	0.00282466
VDAC1_MOUSE	Voltage-dependent anion-selective channel protein 1	VDAC1_MOUSE_Cys245	K.YQVDPDACFSAK.V	19.1562	19.1443	19.0676	19.016	19.0532	19.0217	19.1227	0.0392659	19.0303	0.0163387	-0.0923922	0.0372104
VDAC2_MOUSE	Voltage-dependent anion-selective channel protein 2	VDAC2_MOUSE_Cys104	K.WNTDNTLGTEIAIEDQICQGLK.L	17.5311	17.4874	17.185	16.9764	17.4619	17.1439	17.4012	0.153904	17.1941	0.201363	-0.207102	0.312161
VIGLN_MOUSE	Vigilin	VIGLN_MOUSE_Cys104	K.ICLEIMQR.T	19.1716	19.2562	19.2027	19.3596	19.2645	19.2488	19.2102	0.0349337	19.291	0.0489503	0.0808149	0.130167
VIGLN_MOUSE	Vigilin	VIGLN_MOUSE_Cys53	K.AACLESAQEPAGAWSNK.I	14.5474	13.9258	14.0767	13.908	14.4617	14.2543	14.1833	0.264724	14.208	0.228435	0.0246756	0.925304
VIME_MOUSE	Vimentin	VIME_MOUSE_Cys328	R.QVQSLTCEVDALK.G	20.7871	20.7429	20.1552	21.5102	21.5159	21.0288	20.5618	0.288037	21.3516	0.228264	0.78986	0.0384252
VINC_MOUSE	Vinculin	VINC_MOUSE_Cys313	K.VGELCAGK.E	20.6723	20.742	20.8004	20.4666	20.5408	20.5802	20.7382	0.0523605	20.5292	0.0471195	-0.209051	0.0137283
VINC_MOUSE	Vinculin	VINC_MOUSE_Cys85	K.VENACTK.L	17.6026	17.6084	17.6066	17.2399	17.21	17.2212	17.6059	0.00242446	17.2237	0.0123339	-0.382148	1.74957e-06
VMA5A_MOUSE	von Willebrand factor A domain-containing protein 5A	VMA5A_MOUSE_Cys645	R.VPAYDLCSAESANLVLK.K	18.5986	18.3558	18.4229	18.2625	18.4022	18.4352	18.4591	0.102373	18.3667	0.0748745	-0.0924595	0.360818
VPS18_MOUSE	Vacuolar protein sorting-associated protein 18 homolog	VPS18_MOUSE_Cys713	R.ACVHVYK.V	15.4513	15.3044	15.4121	15.1063	15.2523	14.9681	15.3893	0.0620831	15.1089	0.116006	-0.280355	0.0394191
VPS35_MOUSE	Vacuolar protein sorting-associated protein 35	VPS35_MOUSE_Cys653	R.TQCALAASK.L	19.4723	19.3227	19.5515	19.0163	19.1696	18.9756	19.4488	0.0948572	19.0538	0.0835614	-0.394991	0.0115213
VRK2_MOUSE	Serine/threonine-protein kinase VRK2	VRK2_MOUSE_Cys194	R.YCPNGNHK.Q	14.5718	14.5978	14.7232	14.4894	14.4892	14.4804	14.6309	0.0661196	14.4863	0.00421782	-0.144628	0.0366767
WASP_MOUSE	Wiskott-Aldrich syndrome protein homolog	WASP_MOUSE_Cys322	R.RQEPLPPPPPPCR.G	12.1919	11.5576	12.3896	12.1929	12.1206	11.9974	12.0464	0.35492	12.1036	0.0807072	0.0572466	0.834878
WDR1_MOUSE	WD repeat-containing protein 1	WDR1_MOUSE_Cys225	K.VCALGESK.A	22.6571	22.6955	22.8453	22.6095	22.6592	22.5701	22.7326	0.0811809	22.6129	0.0364329	-0.11972	0.129825
WIPI1_MOUSE	WD repeat domain phosphoinositide-interacting protein 1	WIPI1_MOUSE_Cys318	K.NICTLSTIQK.L	13.6514	13.9656	13.8082	13.5906	12.4192	13.2119	13.8084	0.128299	13.0739	0.488101	-0.734482	0.108679
WIPI2_MOUSE	WD repeat domain phosphoinositide-interacting protein 2	WIPI2_MOUSE_Cys310	R.LPFCGHK.N	17.9501	17.9774	18.1185	17.831	17.9623	17.8436	18.0153	0.0737806	17.8789	0.0591362	-0.136382	0.110969
XPO2_MOUSE	Exportin-2	XPO2_MOUSE_Cys272	K.SQICDNAALYAQK.Y	18.1217	18.2378	18.3802	17.8877	18.0499	17.8785	18.2466	0.105715	17.9387	0.0787219	-0.307841	0.0298501
XPO2_MOUSE	Exportin-2	XPO2_MOUSE_Cys325	K.YDLLVSNAIQFLASVCERPHYK.N	14.9374	15.0932	15.1286	15.3218	15.138	14.8639	15.0531	0.0830789	15.1079	0.188108	0.0547928	0.725443
XPO2_MOUSE	Exportin-2	XPO2_MOUSE_Cys61	K.VCASVTFK.N	21.6764	21.8293	21.8208	21.4744	21.4771	21.4225	21.7755	0.0701804	21.458	0.02513	-0.317484	0.00382811
XPO2_MOUSE	Exportin-2	XPO2_MOUSE_Cys842	K.KICAVGITK.L	20.1077	20.0035	20.0371	19.8866	19.9138	19.5213	20.0495	0.0434425	19.7739	0.178973	-0.27555	0.10181
XPO5_MOUSE	Exportin-5	XPO5_MOUSE_Cys419	K.TDSPSCEYSR.F	13.1803	13.3409	13.3792	12.699	12.9928	12.9002	13.3002	0.0861649	12.864	0.122621	-0.436159	0.0146629
XPO5_MOUSE	Exportin-5	XPO5_MOUSE_Cys605	R.HACSSINK.M	15.4871	15.4307	15.5453	15.4296	15.3591	15.2967	15.4877	0.0467848	15.3618	0.0543067	-0.125906	0.0679151
XPP1_MOUSE	Xaa-Pro aminopeptidase 1	XPP1_MOUSE_Cys279	K.ALCADLSPR.E	18.5674	18.7041	18.7257	18.5608	18.5122	18.5037	18.6657	0.0700767	18.5256	0.0251634	-0.140129	0.0562998
XRN2_MOUSE	5'-3' exoribonuclease 2	XRN2_MOUSE_Cys451	R.NSPGCQVASNPR.Q	12.9364	12.7649	12.7609	12.743	13.0098	12.8389	12.8207	0.0818185	12.8639	0.110338	0.0432059	0.679458
YIPF5_MOUSE	Protein YIPF5	YIPF5_MOUSE_Cys42	K.QYAGCDYSQQGR.F	15.1654	15.2538	15.1119	14.8708	14.949	14.909	15.1771	0.0585279	14.9096	0.0319117	-0.267421	0.00476249
ZCCHV_MOUSE	Zinc finger CCCH-type antiviral protein 1	ZCCHV_MOUSE_Cys612	R.GCQQVNCNK.N	18.2195	18.178	18.4877	18.0435	18.1525	18.0849	18.2951	0.137294	18.0936	0.044914	-0.201437	0.119883
ZCCHV_MOUSE	Zinc finger CCCH-type antiviral protein 1	ZCCHV_MOUSE_Cys617	R.GCQQVNCNK.N	15.6366	15.76	15.8777	15.8013	15.7278	15.6646	15.7581	0.0984628	15.7312	0.0558678	-0.0268435	0.754223
ZDH13_MOUSE	Palmitoyltransferase ZDHHC13	ZDH13_MOUSE_Cys28	R.HGICVHENK.E	13.7582	13.77	14.1075	13.6184	13.7915	13.7785	13.8786	0.161936	13.7294	0.0787143	-0.149122	0.306504
ZFP28_MOUSE	Zinc finger protein 28	ZFP28_MOUSE_Cys632	K.THTGEKPYECK.E	11.1144	10.3243	10.676	10.4717	10.2131	10.6319	10.7049	0.323167	10.4389	0.17253	-0.266004	0.362514
ZN330_MOUSE	Zinc finger protein 330	ZN330_MOUSE_Cys186	R.LGQHSCLR.C	16.3185	16.2955	16.1512	15.893	16.0293	16.0315	16.2551	0.0740522	15.9846	0.0647576	-0.270483	0.0177136
ZN330_MOUSE	Zinc finger protein 330	ZN330_MOUSE_Cys213	K.GKQPPCPK.C	18.1546	18.2673	18.1171	18.0564	18.0041	17.9721	18.1797	0.0638314	18.0109	0.0347478	-0.168821	0.0303549

## Sheet: Table S2
Supplemental Table S2: The identified SSG-sites with treatment by Fe3O4 ENPs
All peptides identifications with peptide MSGF spectra probability values and other parameters were listed in Table S10
Columns E to J are abundance of the SSG-sites from each biological replicate based on the Log2 tranformation of TMT reporter ion intensities
Column O lists Log2 fold change
The symbol * represents oxidation of methionine, # stands for NEM alkylation of Cys, and for those Cys sites without modifications are glutathionylated sites (SSG sites)
UniProt ID	Protein Name	SSG Site	Representative Peptide	Untreated Rep1	Untreated Rep2	Untreated Rep3	Fe3O4-treated Rep1	Fe3O4-treated Rep2	Fe3O4-treated Rep3	Average Untreated	Std dev Untreated	Average Fe3O4-treated	Std dev Fe3O4-treated	Fold Change	p Value
1433E_MOUSE	14-3-3 protein epsilon	1433E_MOUSE_Cys97	K.LICC#DILDVLDK.H	15.9833	15.9946	15.7408	16.0963	15.8566	16.2286	15.9063	0.117112	16.0605	0.153929	0.154261	0.322426
1433E_MOUSE	14-3-3 protein epsilon	1433E_MOUSE_Cys98	K.LIC#CDILDVLDK.H	15.8949	16.0947	16.0373	16.1137	16.3145	16.5243	16.009	0.0840088	16.3175	0.167632	0.308515	0.0805251
1433F_MOUSE	14-3-3 protein eta	1433F_MOUSE_Cys112	K.NCNDFQYESK.V	18.8788	18.843	18.8007	18.9207	18.9681	19.026	18.8408	0.0319445	18.9716	0.043049	0.130769	0.0260576
1433G_MOUSE	14-3-3 protein gamma	1433G_MOUSE_Cys112	K.NCSETQYESK.V	14.9618	14.7046	14.8083	14.8142	14.7582	14.8715	14.8249	0.105642	14.8146	0.0462682	-0.0102465	0.906074
1433G_MOUSE	14-3-3 protein gamma	1433G_MOUSE_Cys194	R.LGLALNYSVFYYEIQNAPEQACHLAK.T	16.5054	15.9774	16.5226	16.1351	16.6017	16.3675	16.3351	0.253041	16.3681	0.190468	0.0329622	0.890106
1433T_MOUSE	14-3-3 protein theta	1433T_MOUSE_Cys25	R.YDDMATCMK.A	20.8779	20.7432	20.9571	20.925	21.0788	20.8931	20.8594	0.0883128	20.9656	0.0810628	0.106207	0.278469
1433Z_MOUSE	14-3-3 protein zeta/delta	1433Z_MOUSE_Cys25	R.YDDMAACM*K.S	22.6257	22.5354	22.665	22.5396	22.4714	22.5269	22.6087	0.0542262	22.5126	0.0295934	-0.0960709	0.0927227
1433Z_MOUSE	14-3-3 protein zeta/delta	1433Z_MOUSE_Cys94	R.DICNDVLSLLEK.F	18.606	18.2394	18.5263	18.569	18.5849	18.4613	18.4573	0.157431	18.5384	0.0549174	0.0811157	0.529269
2AAA_MOUSE	Serine/threonine-protein phosphatase 2A 65 kDa regulatory subunit A alpha isoform	2AAA_MOUSE_Cys294	K.TDLVPAFQNLMKDCEAEVR.A	17.8666	17.5876	17.3876	17.9951	17.9758	17.844	17.6139	0.196414	17.9383	0.067165	0.324397	0.0916199
2AAA_MOUSE	Serine/threonine-protein phosphatase 2A 65 kDa regulatory subunit A alpha isoform	2AAA_MOUSE_Cys310	K.VKEFCENLSADC#R.E	18.6888	18.6483	18.7049	19.0085	18.8405	19.0426	18.6807	0.0237806	18.9639	0.0883116	0.283216	0.0118806
6PGD_MOUSE	6-phosphogluconate dehydrogenase, decarboxylating	6PGD_MOUSE_Cys170	K.VGTGEPCC#DWVGDEGAGHFVK.M	19.2519	18.896	19.3605	19.549	19.4641	19.5099	19.1695	0.198377	19.5077	0.0346783	0.33817	0.0764225
6PGD_MOUSE	6-phosphogluconate dehydrogenase, decarboxylating	6PGD_MOUSE_Cys171	K.VGTGEPC#CDWVGDEGAGHFVK.M	16.5764	16.7216	16.5795	16.9273	16.8723	16.8167	16.6258	0.0677117	16.8721	0.045177	0.246276	0.0128604
6PGD_MOUSE	6-phosphogluconate dehydrogenase, decarboxylating	6PGD_MOUSE_Cys422	R.VISTGVQAGIPMPCFTTALSFYDGYR.H	16.9467	16.7119	16.9825	16.9987	17.477	17.2354	16.8804	0.120004	17.237	0.195233	0.35663	0.0925689
AAAT_MOUSE	Neutral amino acid transporter B(0)	AAAT_MOUSE_Cys216	K.DNSCKIPQSCIQR.E	22.4844	22.3574	22.4259	22.6797	22.6133	22.6938	22.4225	0.0519165	22.6623	0.0350922	0.239753	0.00565146
AAAT_MOUSE	Neutral amino acid transporter B(0)	AAAT_MOUSE_Cys222	K.IPQSCIQR.E	23.3387	23.3422	23.4458	23.6791	23.6644	23.6605	23.3756	0.0496577	23.668	0.00798669	0.292431	0.00119255
AAAT_MOUSE	Neutral amino acid transporter B(0)	AAAT_MOUSE_Cys479	R.SCTVLNVEGDAFGAGLLQSYVDR.T	18.8073	18.7116	18.8181	18.9996	18.8518	19.1887	18.779	0.0478488	19.0134	0.137911	0.234375	0.0856675
AATM_MOUSE	Aspartate aminotransferase, mitochondrial	AATM_MOUSE_Cys106	K.NLDKEYLPIGGLAEFCK.A	18.5003	18.6784	18.356	18.7296	18.5164	18.732	18.5116	0.131874	18.6593	0.101073	0.14772	0.277041
AATM_MOUSE	Aspartate aminotransferase, mitochondrial	AATM_MOUSE_Cys272	R.HFIEQGINVCLCQSYAK.N	18.8235	18.3266	19.1202	18.916	18.9902	19.0425	18.7567	0.327414	18.9829	0.0519059	0.226184	0.389229
AATM_MOUSE	Aspartate aminotransferase, mitochondrial	AATM_MOUSE_Cys274	R.HFIEQGINVCLCQSYAK.N	18.8235	18.3266	19.1202	18.916	18.9902	19.0425	18.7567	0.327414	18.9829	0.0519059	0.226184	0.389229
AB1IP_MOUSE	Amyloid beta A4 precursor protein-binding family B member 1-interacting protein	AB1IP_MOUSE_Cys384	K.APTDHCFVLK.H	18.5333	18.6468	18.6844	18.606	18.8372	18.805	18.6215	0.0642328	18.7494	0.102229	0.127911	0.208424
AB1IP_MOUSE	Amyloid beta A4 precursor protein-binding family B member 1-interacting protein	AB1IP_MOUSE_Cys535	R.SSDTCGSPALPSK.V	16.7948	16.4234	16.5702	16.6342	16.6018	16.6926	16.5961	0.152709	16.6429	0.0375386	0.0467503	0.695774
ABCD1_MOUSE	ATP-binding cassette sub-family D member 1	ABCD1_MOUSE_Cys571	K.GCSEQQLEAILGIVHLR.H	16.5934	16.7183	16.6514	16.998	16.9744	17.0167	16.6544	0.0510353	16.9964	0.0173036	0.341998	0.000852865
ABCE1_MOUSE	ATP-binding cassette sub-family E member 1	ABCE1_MOUSE_Cys201	K.TQAIVCQQLDLTHLK.E	14.6723	15.1962	14.8354	14.614	14.7797	14.7747	14.9013	0.218915	14.7228	0.0769566	-0.178497	0.337821
ABCE1_MOUSE	ATP-binding cassette sub-family E member 1	ABCE1_MOUSE_Cys29	K.KSCPVVR.M	18.0052	17.9492	17.9214	18.3559	18.365	18.3057	17.9586	0.0348291	18.3422	0.026107	0.383611	0.000238324
ABCE1_MOUSE	ATP-binding cassette sub-family E member 1	ABCE1_MOUSE_Cys38	K.LCIEVTPQSK.I	17.1652	17.1386	17.0873	17.2808	17.2137	17.333	17.1304	0.032295	17.2758	0.0488286	0.14546	0.0245854
ABCF2_MOUSE	ATP-binding cassette sub-family F member 2	ABCF2_MOUSE_Cys528	R.NLSDGQKCR.V	15.4008	15.2114	15.1532	15.6271	15.3464	15.3346	15.2551	0.105715	15.436	0.135201	0.180902	0.210309
ABR_MOUSE	Active breakpoint cluster region-related protein	ABR_MOUSE_Cys201	K.CSQSNNQFQK.I	15.4505	15.4327	15.1205	15.7418	15.5709	15.6282	15.3346	0.151557	15.647	0.0710349	0.31241	0.0576037
ACLY_MOUSE	ATP-citrate synthase	ACLY_MOUSE_Cys623	K.GVTIIGPATVGGIKPGCFK.I	17.1353	17.0119	16.6033	16.8324	17.1337	17.0896	16.9168	0.227328	17.0186	0.132855	0.101723	0.613866
ACON_MOUSE	Aconitate hydratase, mitochondrial	ACON_MOUSE_Cys385	R.VGLIGSCTNSSYEDM*GR.S	19.4262	19.3859	19.2462	19.479	19.6393	19.5334	19.3528	0.077118	19.5506	0.0665859	0.197813	0.0516023
ACON_MOUSE	Aconitate hydratase, mitochondrial	ACON_MOUSE_Cys410	K.QALAHGLKCK.S	15.6479	15.2601	15.5185	15.6763	15.9003	15.77	15.4755	0.161235	15.7822	0.0918377	0.306689	0.0796013
ACON_MOUSE	Aconitate hydratase, mitochondrial	ACON_MOUSE_Cys448	R.DVGGIVLANACGPCIGQWDRK.D	19.8613	19.8142	19.8424	19.9418	20.1274	19.9674	19.8393	0.0193566	20.0122	0.0821461	0.172934	0.0442138
ACON_MOUSE	Aconitate hydratase, mitochondrial	ACON_MOUSE_Cys451	R.DVGGIVLANAC#GPCIGQWDR.K	19.5593	19.4114	19.5549	19.533	19.6911	19.5159	19.5086	0.0687011	19.58	0.0788676	0.0714453	0.388743
ACSL1_MOUSE	Long-chain-fatty-acid--CoA ligase 1	ACSL1_MOUSE_Cys109	R.GIQVSNNGPCLGSR.K	17.0911	17.0531	17.0959	17.2736	17.2065	17.2729	17.08	0.0191435	17.251	0.0314689	0.170963	0.00278685
ACSL4_MOUSE	Long-chain-fatty-acid--CoA ligase 4	ACSL4_MOUSE_Cys363	K.GDCTVLKPTLMAAVPEIMDR.I	19.5567	19.3846	19.3662	19.6177	19.8074	19.5053	19.4359	0.0857969	19.6435	0.12469	0.207598	0.124417
ACTB_MOUSE	Actin, cytoplasmic 1	ACTB_MOUSE_Cys217	K.EKLCYVALDFEQEMATAASSSSLEK.S	22.0629	21.6296	21.8239	22.1296	22.2188	22.0781	21.8388	0.177216	22.1422	0.0581293	0.303352	0.0829188
ACTBL_MOUSE	Beta-actin-like protein 2	ACTBL_MOUSE_Cys286	K.CDVDIRK.D	23.9153	23.734	23.5021	23.9125	23.7119	23.9213	23.7171	0.169101	23.8486	0.0966817	0.131442	0.393972
ACTN1_MOUSE	Alpha-actinin-1	ACTN1_MOUSE_Cys41	K.TFTAWCNSHLR.K	16.4652	16.3891	16.3256	16.5456	16.5508	16.7213	16.3933	0.0570974	16.6059	0.0816194	0.212587	0.0392308
ACTN1_MOUSE	Alpha-actinin-1	ACTN1_MOUSE_Cys690	K.IDQLECDHQLIQEALIFDNK.H	13.5332	13.551	13.0023	13.261	13.6147	13.6535	13.3622	0.254562	13.5097	0.176593	0.147553	0.537525
ADA15_MOUSE	Disintegrin and metalloproteinase domain-containing protein 15	ADA15_MOUSE_Cys742	R.APQSCPPERPGPPQR.A	12.7224	12.6228	12.595	12.8541	12.8104	13.056	12.6467	0.0546925	12.9068	0.106988	0.260125	0.0375997
ADA17_MOUSE	Disintegrin and metalloproteinase domain-containing protein 17	ADA17_MOUSE_Cys365	R.ANSHGGVCPK.A	17.2091	17.0459	17.0392	17.18	17.2423	17.204	17.0981	0.0785578	17.2088	0.0256612	0.110724	0.131029
ADA17_MOUSE	Disintegrin and metalloproteinase domain-containing protein 17	ADA17_MOUSE_Cys469	K.AQECFQER.S	17.6023	17.5028	17.6033	17.6683	17.6653	17.5248	17.5695	0.0471409	17.6195	0.0669481	0.0499855	0.436643
ADAM8_MOUSE	Disintegrin and metalloproteinase domain-containing protein 8	ADAM8_MOUSE_Cys164	K.AGTCGVK.D	17.6512	17.7363	17.7294	17.8145	18.0205	17.9703	17.7056	0.0385821	17.9351	0.087675	0.229465	0.0275861
ADPRH_MOUSE	[Protein ADP-ribosylarginine] hydrolase	ADPRH_MOUSE_Cys134	R.IPFNSHEGGCGAAMR.A	15.736	15.7328	15.178	15.6267	15.6591	15.464	15.549	0.262297	15.5833	0.0854046	0.0343196	0.868884
ADRM1_MOUSE	Proteasomal ubiquitin receptor ADRM1	ADRM1_MOUSE_Cys88	K.RVPQCPSGR.V	15.2591	15.4016	15.1917	15.5153	15.5238	15.5083	15.2841	0.0875283	15.5158	0.00634927	0.231689	0.0202328
ADT1_MOUSE	ADP/ATP translocase 1	ADT1_MOUSE_Cys129	R.YFAGNLASGGAAGATSLCFVYPLDFAR.T	16.8642	17.1996	16.8108	17.1878	17.3143	17.3003	16.9582	0.172104	17.2675	0.0566028	0.30926	0.0732331
ADT2_MOUSE	ADP/ATP translocase 2	ADT2_MOUSE_Cys160	K.GLGDCLVK.I	22.7268	22.7645	22.5725	22.9255	22.9867	22.6742	22.688	0.0830474	22.8621	0.135196	0.174166	0.195528
ADT2_MOUSE	ADP/ATP translocase 2	ADT2_MOUSE_Cys257	R.KGTDIMYTGTLDCWR.K	21.5745	21.6305	21.5446	21.8891	21.7875	21.6955	21.5832	0.0356036	21.7907	0.0790813	0.207497	0.0276939
AEDO_MOUSE	2-aminoethanethiol dioxygenase	AEDO_MOUSE_Cys18	R.QACLTFR.G	19.6179	19.5163	19.4977	19.6692	19.6572	19.8266	19.544	0.0528454	19.7177	0.0771923	0.17371	0.0584273
AIMP1_MOUSE	Aminoacyl tRNA synthase complex-interacting multifunctional protein 1	AIMP1_MOUSE_Cys159	R.IGCIVTAK.K	22.3348	22.2814	22.3132	22.497	22.401	22.7258	22.3098	0.0219458	22.5413	0.136244	0.231489	0.0766306
AIMP1_MOUSE	Aminoacyl tRNA synthase complex-interacting multifunctional protein 1	AIMP1_MOUSE_Cys227	R.GVLSQAM*VM*CASSPEK.V	21.7839	22.1373	21.8074	22.1146	21.9826	22.4293	21.9095	0.161305	22.1755	0.187372	0.265976	0.202812
AIMP1_MOUSE	Aminoacyl tRNA synthase complex-interacting multifunctional protein 1	AIMP1_MOUSE_Cys282	K.IWEQIQPDLHTNAECVATYK.G	17.7233	17.5982	17.7065	17.8049	17.7603	17.788	17.676	0.0554139	17.7844	0.0183946	0.108411	0.0584394
AIMP2_MOUSE	Aminoacyl tRNA synthase complex-interacting multifunctional protein 2	AIMP2_MOUSE_Cys306	K.SCENLAPFSTALQLLK.-	17.8964	17.9458	17.914	18.0401	18.1236	18.0216	17.9187	0.0204562	18.0618	0.0443332	0.143046	0.0143379
AKCL2_MOUSE	1,5-anhydro-D-fructose reductase	AKCL2_MOUSE_Cys178	R.VRPITNQIECHPYLNQK.K	15.1563	15.2228	14.8601	15.2542	15.7334	15.7622	15.0797	0.157677	15.5833	0.232949	0.503541	0.0645585
AKIB1_MOUSE	Ankyrin repeat and IBR domain-containing protein 1	AKIB1_MOUSE_Cys716	R.AACLVQQK.R	18.284	18.302	18.1984	18.4116	18.5181	18.5484	18.2615	0.0452059	18.4927	0.0586374	0.231215	0.0115435
AL9A1_MOUSE	4-trimethylaminobutyraldehyde dehydrogenase	AL9A1_MOUSE_Cys267	K.SPLIIFSDCNMENAVK.G	16.7029	16.8678	16.7682	16.831	16.9388	16.9351	16.7796	0.067832	16.9016	0.0499669	0.121984	0.109984
ALD2_MOUSE	Aldose reductase-related protein 2	ALD2_MOUSE_Cys187	K.HKPVTNQVECHPYLTQEK.L	15.3602	15.3968	15.4998	15.8582	15.577	16.1393	15.4189	0.0590784	15.8582	0.229557	0.439264	0.0587534
ALD2_MOUSE	Aldose reductase-related protein 2	ALD2_MOUSE_Cys200	K.LIQYCHSK.G	19.6856	19.62	19.9306	19.7963	19.9669	19.7915	19.7454	0.133648	19.8516	0.0815438	0.106178	0.391818
ALDH2_MOUSE	Aldehyde dehydrogenase, mitochondrial	ALDH2_MOUSE_Cys68	R.KTFPTVNPSTGEVICQVAEGNKEDVDK.A	16.6276	16.6845	17.4897	17.1561	16.9374	17.0437	16.9339	0.393706	17.0457	0.0893063	0.11179	0.715316
ALDOA_MOUSE	Fructose-bisphosphate aldolase A	ALDOA_MOUSE_Cys178	R.YASICQQNGIVPIVEPEILPDGDHDLK.R	16.3874	15.6594	15.5965	16.4055	16.7025	17.4584	15.8811	0.358926	16.8555	0.443266	0.974366	0.073083
ALDOA_MOUSE	Fructose-bisphosphate aldolase A	ALDOA_MOUSE_Cys202	R.CQYVTEK.V	20.6459	20.8333	20.848	20.8807	20.8426	20.9347	20.7757	0.0920023	20.886	0.037777	0.110272	0.191954
ALDOA_MOUSE	Fructose-bisphosphate aldolase A	ALDOA_MOUSE_Cys240	N.M*VTPGHACTQK.F	19.5377	19.6657	19.7798	19.7025	19.795	19.91	19.661	0.0988975	19.8025	0.0848726	0.141458	0.199566
ALDOA_MOUSE	Fructose-bisphosphate aldolase A	ALDOA_MOUSE_Cys290	K.CPLLKPWALTFSYGR.A	19.6017	19.6627	19.6852	19.5157	19.7899	19.79	19.6499	0.0353044	19.6986	0.129293	0.0486672	0.634648
ALDOA_MOUSE	Fructose-bisphosphate aldolase A	ALDOA_MOUSE_Cys339	R.ALANSLACQGK.Y	23.4416	23.1826	23.1671	23.2888	23.1877	23.4435	23.2638	0.125903	23.3067	0.105198	0.04292	0.730169
ALDR_MOUSE	Aldose reductase	ALDR_MOUSE_Cys200	K.LIEYCHSK.G	16.5648	16.5323	16.7833	16.8954	17.0915	16.952	16.6268	0.111424	16.9796	0.0823882	0.352841	0.0227404
ALDR_MOUSE	Aldose reductase	ALDR_MOUSE_Cys299	R.VCALM*SCAK.H	20.4086	20.3612	20.2145	20.4337	20.519	20.5453	20.3281	0.0826419	20.4994	0.0476311	0.171267	0.0640316
ALDR_MOUSE	Aldose reductase	ALDR_MOUSE_Cys304	R.VCALM*SCAK.H	17.3435	17.1438	17.1085	17.3469	17.2792	17.3394	17.1986	0.103453	17.3218	0.0303124	0.123215	0.181312
ALDR_MOUSE	Aldose reductase	ALDR_MOUSE_Cys81	K.LWCTFHDK.S	18.4146	18.5014	18.4238	18.4269	18.4157	18.4365	18.4466	0.0389226	18.4264	0.00849207	-0.020192	0.513127
AMPB_MOUSE	Aminopeptidase B	AMPB_MOUSE_Cys369	R.ISTILFGAAYTCLEAATGR.A	15.5886	15.7202	15.2561	15.6057	15.7935	15.7243	15.5216	0.195323	15.7078	0.0775603	0.186222	0.278409
AMPD2_MOUSE	AMP deaminase 2	AMPD2_MOUSE_Cys26	R.SLPGNAPCLK.H	14.2902	13.8417	13.3884	14.0238	14.3804	14.1089	13.8401	0.36813	14.171	0.152068	0.33091	0.305189
AMPL_MOUSE	Cytosol aminopeptidase	AMPL_MOUSE_Cys313	R.ADMGGAATICSAIVSAAK.L	17.3503	17.2247	17.1297	17.4928	17.4397	17.6186	17.2349	0.0903378	17.517	0.0750179	0.282114	0.0273365
AMPL_MOUSE	Cytosol aminopeptidase	AMPL_MOUSE_Cys376	R.LILADALCYAHTFNPK.V	14.7492	14.6587	14.167	14.7266	14.8465	14.7346	14.525	0.255826	14.7692	0.0547014	0.24426	0.257177
AMPL_MOUSE	Cytosol aminopeptidase	AMPL_MOUSE_Cys462	R.SAGACTAAAFLR.E	18.8209	18.6402	18.7499	18.8658	18.9348	18.8889	18.737	0.0743336	18.8965	0.0286641	0.159522	0.0472635
AN32A_MOUSE	Acidic leucine-rich nuclear phosphoprotein 32 family member A	AN32A_MOUSE_Cys123	K.SLDLFNCEVTNLNAYR.E	17.2657	16.4095	17.0415	16.9513	17.1754	16.8598	16.9055	0.36249	16.9955	0.132607	0.0899507	0.758259
AN32A_MOUSE	Acidic leucine-rich nuclear phosphoprotein 32 family member A	AN32A_MOUSE_Cys27	K.ELVLDNCK.S	23.8004	23.7092	23.8353	23.6214	23.5553	23.6927	23.7816	0.0531767	23.6231	0.0560779	-0.158518	0.0440832
AN32A_MOUSE	Acidic leucine-rich nuclear phosphoprotein 32 family member A	AN32A_MOUSE_Cys87	R.ISGDLEVLAEKCPNLK.H	17.3308	16.6712	17.0529	16.5925	16.8965	16.7557	17.0183	0.270372	16.7483	0.124229	-0.270055	0.268613
AN32B_MOUSE	Acidic leucine-rich nuclear phosphoprotein 32 family member B	AN32B_MOUSE_Cys123	K.SLDLFGCEVTNR.S	21.2469	20.9387	21.0385	21.2399	21.0675	21.233	21.0747	0.128381	21.1801	0.0797375	0.10544	0.379658
AN32E_MOUSE	Acidic leucine-rich nuclear phosphoprotein 32 family member E	AN32E_MOUSE_Cys123	K.SLDLFNCEITNLEDYR.E	18.0834	18.0644	18.0062	18.1377	18.1741	18.3089	18.0513	0.0328693	18.2069	0.0736515	0.155555	0.0525739
AN32E_MOUSE	Acidic leucine-rich nuclear phosphoprotein 32 family member E	AN32E_MOUSE_Cys87	K.CPNLTYLNLSGNK.I	19.1413	19.0348	19.1248	19.0654	19.3761	19.2157	19.1003	0.0468015	19.219	0.126851	0.118793	0.281914
ANLN_MOUSE	Actin-binding protein anillin	ANLN_MOUSE_Cys328	R.KPCEKPTLSQGAQPK.E	13.1653	12.6339	13.1058	13.129	13.227	12.7722	12.9683	0.237709	13.0427	0.195411	0.074423	0.749541
ANM1_MOUSE	Protein arginine N-methyltransferase 1	ANM1_MOUSE_Cys250	K.QLVTNACLIK.E	20.4844	20.4593	20.386	20.7638	20.738	20.6049	20.4432	0.0417244	20.7022	0.0696431	0.259026	0.0107227
ANM1_MOUSE	Protein arginine N-methyltransferase 1	ANM1_MOUSE_Cys272	K.VEDLTFTSPFCLQVK.R	17.4202	17.496	17.6786	17.7327	17.7459	17.6432	17.5316	0.108465	17.7073	0.0456337	0.175681	0.102334
ANO6_MOUSE	Anoctamin-6	ANO6_MOUSE_Cys251	K.AAFPLHDCR.F	14.8123	14.7502	14.8669	15.0435	15.0577	14.9205	14.8098	0.047687	15.0072	0.0616173	0.197428	0.0230962
ANR17_MOUSE	Ankyrin repeat domain-containing protein 17	ANR17_MOUSE_Cys1154	R.TKDTPLSLACSGGR.Q	18.2577	18.1219	18.0387	18.3895	18.3901	18.4503	18.1394	0.0902936	18.4099	0.0285157	0.270505	0.0156031
ANT3_MOUSE	Antithrombin-III	ANT3_MOUSE_Cys128	K.LGACNDTLK.Q	21.523	21.6367	21.7504	22.11	22.5535	22.201	21.6367	0.0928183	22.2882	0.191248	0.651474	0.0123112
ANXA1_MOUSE	Annexin A1	ANXA1_MOUSE_Cys270	K.CATSTPAFFAEK.L	18.5233	18.5767	18.4913	18.6334	18.6272	18.8018	18.5304	0.0352514	18.6874	0.0808795	0.156991	0.0656063
ANXA1_MOUSE	Annexin A1	ANXA1_MOUSE_Cys324	K.YGISLCQAILDETK.G	19.396	19.0985	19.2021	19.3623	19.4291	19.5916	19.2322	0.123314	19.461	0.096281	0.228744	0.107507
ANXA2_MOUSE	Annexin A2	ANXA2_MOUSE_Cys262	K.GDLENAFLNLVQCIQNKPLYFADR.L	18.8398	18.172	18.8269	18.9709	18.4591	18.2297	18.6129	0.31182	18.5532	0.309856	-0.0596377	0.857198
ANXA4_MOUSE	Annexin A4	ANXA4_MOUSE_Cys198	K.FLSILCSR.N	18.0275	17.9533	18.1345	17.9621	17.9778	17.9418	18.0384	0.0743771	17.9606	0.0147244	-0.0778174	0.220283
ANXA7_MOUSE	Annexin A7	ANXA7_MOUSE_Cys260	R.VLIEILCTR.T	17.8501	17.8241	17.8743	17.9341	17.9485	18.0475	17.8495	0.0205176	17.9767	0.0504014	0.127218	0.0297613
AP2A1_MOUSE	AP-2 complex subunit alpha-1	AP2A1_MOUSE_Cys492	K.TVFEALQAPACHENMVK.V	13.6177	14.3843	13.7045	14.1988	13.6611	13.7495	13.9021	0.342748	13.8698	0.2354	-0.0323368	0.91772
AP2M1_MOUSE	AP-2 complex subunit mu	AP2M1_MOUSE_Cys337	R.IPTPLNTSGVQVICMK.G	18.2295	18.3985	18.2936	18.4551	18.5542	18.44	18.3072	0.0696694	18.4831	0.0506382	0.175918	0.0446277
APEX1_MOUSE	DNA-(apurinic or apyrimidinic site) lyase	APEX1_MOUSE_Cys207	R.KPLVLCGDLNVAHEEIDLR.N	17.6129	17.3884	18.0412	17.6751	17.6522	17.8084	17.6808	0.270773	17.7119	0.0688508	0.0310932	0.882564
APT_MOUSE	Adenine phosphoribosyltransferase	APT_MOUSE_Cys140	R.VVIVDDLLATGGTMFAACDLLHQLR.A	17.0732	16.9983	17.1945	17.223	17.4561	17.1217	17.0887	0.0808259	17.2669	0.139994	0.178221	0.193964
APT_MOUSE	Adenine phosphoribosyltransferase	APT_MOUSE_Cys153	R.AEVVECVSLVELTSLK.G	16.5765	16.4445	16.4366	16.7644	16.6111	16.9599	16.4859	0.0641745	16.7785	0.142748	0.292592	0.0573499
ARC1B_MOUSE	Actin-related protein 2/3 complex subunit 1B	ARC1B_MOUSE_Cys26	R.TQIAICPNNHEVHIYEK.S	16.1436	15.9104	16.1206	16.3912	16.4357	16.4134	16.0582	0.104929	16.4134	0.0181717	0.355232	0.00918822
ARFG2_MOUSE	ADP-ribosylation factor GTPase-activating protein 2	ARFG2_MOUSE_Cys97	R.QHGCMANDANTK.Y	8.7211	8.84466	9.31683	9.42319	9.52552	9.2341	8.96086	0.256709	9.39427	0.120718	0.433405	0.096818
ARI1_MOUSE	E3 ubiquitin-protein ligase ARIH1	ARI1_MOUSE_Cys345	K.CHVTIEK.D	16.8475	17.0769	16.7615	17.1819	17.3332	17.2977	16.8953	0.133104	17.2709	0.0646055	0.375611	0.0229567
ARL8A_MOUSE	ADP-ribosylation factor-like protein 8A	ARL8A_MOUSE_Cys159	R.EIC#CYSISC#K.E	18.7963	18.6149	18.5821	18.9908	18.9273	19.0809	18.6644	0.0941867	18.9997	0.0630383	0.335272	0.0138783
ARL8A_MOUSE	ADP-ribosylation factor-like protein 8A	ARL8A_MOUSE_Cys164	R.EIC#C#YSISCK.E	18.4825	18.3809	18.0793	18.5377	18.621	18.6982	18.3142	0.171213	18.619	0.0655365	0.304748	0.0784413
ARP2_MOUSE	Actin-related protein 2	ARP2_MOUSE_Cys11	R.KVVVCDNGTGFVK.C	20.3335	20.0691	20.1467	20.3321	20.2405	20.1332	20.1831	0.110941	20.2353	0.0812943	0.0521779	0.620053
ARP2_MOUSE	Actin-related protein 2	ARP2_MOUSE_Cys221	K.LCYVGYNIEQEQK.L	17.943	17.9856	17.7804	18.2222	18.3267	18.1434	17.903	0.0884223	18.2307	0.0750931	0.327723	0.0161944
ARP3_MOUSE	Actin-related protein 3	ARP3_MOUSE_Cys12	R.LPAC#VVDCGTGYTK.L	19.7078	19.5991	19.527	19.813	19.864	19.9177	19.6113	0.0743119	19.8649	0.0427667	0.25361	0.0138833
ARP3_MOUSE	Actin-related protein 3	ARP3_MOUSE_Cys34	K.LGYAGNTEPQFIIPSCIAIK.E	19.15	19.0431	18.8393	19.2402	19.208	19.1597	19.0108	0.128852	19.2026	0.033082	0.191826	0.111038
ARP3_MOUSE	Actin-related protein 3	ARP3_MOUSE_Cys8	R.LPACVVDCGTGYTK.L	19.9377	19.7241	19.6876	19.9101	19.9955	19.9969	19.7831	0.110286	19.9675	0.0405895	0.184404	0.0907013
ARPC3_MOUSE	Actin-related protein 2/3 complex subunit 3	ARPC3_MOUSE_Cys162	K.WWTCFVK.R	18.0468	18.1754	18.3233	18.4664	18.3236	18.2523	18.1819	0.112963	18.3474	0.089013	0.165575	0.178824
ARPC4_MOUSE	Actin-related protein 2/3 complex subunit 4	ARPC4_MOUSE_Cys21	R.ATLQAALCLENFSSQVVER.H	18.3828	18.0344	17.9349	18.2632	18.6606	18.5283	18.1174	0.192056	18.484	0.165251	0.366659	0.110115
ARRB2_MOUSE	Beta-arrestin-2	ARRB2_MOUSE_Cys17	K.KSSPNCK.L	14.9241	14.8314	14.6968	14.9625	15.0489	15.0688	14.8175	0.0933231	15.0267	0.046138	0.209247	0.0467489
ASGL1_MOUSE	Isoaspartyl peptidase/L-asparaginase	ASGL1_MOUSE_Cys179	K.GAQNADCPK.N	14.9181	14.8381	14.9499	15.011	14.8073	14.9547	14.902	0.0470504	14.9243	0.0859164	0.0223002	0.763611
ASNS_MOUSE	Asparagine synthetase [glutamine-hydrolyzing]	ASNS_MOUSE_Cys255	R.IGCLLSGGLDSSLVAASLLK.Q	18.0284	18.2517	18.2146	18.1418	18.4442	18.3236	18.1649	0.0976809	18.3032	0.124287	0.138338	0.283541
ASPH_MOUSE	Aspartyl/asparaginyl beta-hydroxylase	ASPH_MOUSE_Cys624	R.KNENACK.G	17.6056	17.6663	17.4733	18.0456	18.1463	17.7332	17.5817	0.0805629	17.9751	0.175878	0.393353	0.0452141
AT1A1_MOUSE	Sodium/potassium-transporting ATPase subunit alpha-1	AT1A1_MOUSE_Cys374	K.NLEAVETLGSTSTICSDK.T	17.2217	17.3744	17.3777	17.5956	17.5387	17.6228	17.3246	0.0727605	17.5857	0.0350515	0.261111	0.0102436
AT1A1_MOUSE	Sodium/potassium-transporting ATPase subunit alpha-1	AT1A1_MOUSE_Cys428	R.IAGLCNR.A	20.6334	20.5426	20.6984	20.7183	20.7777	20.8022	20.6248	0.0638676	20.7661	0.035226	0.141273	0.0519489
AT1A4_MOUSE	Sodium/potassium-transporting ATPase subunit alpha-4	AT1A4_MOUSE_Cys714	K.LIIVEGCQR.L	21.888	21.8434	21.7723	22.1298	22.1806	21.9847	21.8346	0.0476808	22.0984	0.0830436	0.263818	0.017598
AT1B3_MOUSE	Sodium/potassium-transporting ATPase subunit beta-3	AT1B3_MOUSE_Cys144	R.ACQFPVSLLEECSGVTDANFGYSK.G	17.1542	17.2377	17.1307	17.0355	17.5631	17.4646	17.1742	0.0459365	17.3544	0.22908	0.180205	0.336674
AT1B3_MOUSE	Sodium/potassium-transporting ATPase subunit beta-3	AT1B3_MOUSE_Cys154	R.ACQFPVSLLEECSGVTDANFGYSK.G	17.1542	17.2377	17.1307	17.0355	17.5631	17.4646	17.1742	0.0459365	17.3544	0.22908	0.180205	0.336674
AT1B3_MOUSE	Sodium/potassium-transporting ATPase subunit beta-3	AT1B3_MOUSE_Cys191	R.IIDLIPDGYPQISCLPK.E	18.5176	19.3232	18.8655	19.318	19.1925	19.312	18.9021	0.329897	19.2742	0.0577705	0.372085	0.191241
AT1B3_MOUSE	Sodium/potassium-transporting ATPase subunit beta-3	AT1B3_MOUSE_Cys249	K.EVTVECHIAGTR.N	17.6882	17.4993	17.6437	17.7589	17.9929	17.9723	17.6104	0.0806489	17.908	0.105765	0.297647	0.0340268
AT2A1_MOUSE	Sarcoplasmic/endoplasmic reticulum calcium ATPase 1	AT2A1_MOUSE_Cys344	R.SLPSVETLGCTSVIC#SDK.T	17.2023	17.2929	17.3318	17.6992	17.6216	17.5854	17.2757	0.0542491	17.6354	0.0475019	0.359737	0.00212825
AT2A2_MOUSE	Sarcoplasmic/endoplasmic reticulum calcium ATPase 2	AT2A2_MOUSE_Cys364	K.TGTLTTNQM*SVCR.M	14.7143	14.5286	14.2257	14.6728	14.6699	14.7105	14.4895	0.201359	14.6844	0.0184931	0.194831	0.244672
AT2A2_MOUSE	Sarcoplasmic/endoplasmic reticulum calcium ATPase 2	AT2A2_MOUSE_Cys471	R.ANACNSVIK.Q	17.8313	17.6784	17.8297	17.8351	17.8902	17.9488	17.7798	0.0716971	17.8914	0.046435	0.11155	0.138501
AT2A2_MOUSE	Sarcoplasmic/endoplasmic reticulum calcium ATPase 2	AT2A2_MOUSE_Cys595	K.YETNLTFVGCVGMLDPPR.I	14.3233	14.5944	14.1541	14.9302	14.5303	14.4139	14.3573	0.181346	14.6248	0.221127	0.267515	0.256425
AT2A2_MOUSE	Sarcoplasmic/endoplasmic reticulum calcium ATPase 2	AT2A2_MOUSE_Cys875	R.VSFYQLSHFLQCK.E	17.1741	17.1683	17.404	17.3302	17.595	17.3189	17.2488	0.109744	17.4147	0.127561	0.16587	0.23576
AT2A2_MOUSE	Sarcoplasmic/endoplasmic reticulum calcium ATPase 2	AT2A2_MOUSE_Cys998	R.NYLEQPGKECVQPATK.S	16.9006	16.6552	16.7655	16.9525	16.8965	17.0321	16.7738	0.100344	16.9603	0.0556565	0.186548	0.0830159
AT2A3_MOUSE	Sarcoplasmic/endoplasmic reticulum calcium ATPase 3	AT2A3_MOUSE_Cys471	R.AGACNSVIK.Q	17.8431	17.8155	17.7139	17.9632	17.9444	17.9234	17.7908	0.0555721	17.9436	0.0162625	0.152801	0.0202614
ATAD1_MOUSE	ATPase family AAA domain-containing protein 1	ATAD1_MOUSE_Cys137	K.GVLLYGPPGCGK.T	18.4484	18.343	18.4495	18.6306	18.6671	18.7378	18.4136	0.049918	18.6785	0.0445138	0.264874	0.00498996
ATE1_MOUSE	Arginyl-tRNA--protein transferase 1	ATE1_MOUSE_Cys79	R.CHPLQFQPSK.S	14.4626	14.5034	14.1599	14.6998	14.5941	14.8815	14.3753	0.153246	14.7251	0.118663	0.349832	0.0631318
ATP5E_MOUSE	ATP synthase subunit epsilon, mitochondrial	ATP5E_MOUSE_Cys19	R.FSQICAK.A	22.1053	22.1709	22.114	22.2236	22.124	22.1629	22.1301	0.029114	22.1701	0.0409702	0.0400639	0.322664
ATX2_MOUSE	Ataxin-2	ATX2_MOUSE_Cys863	K.RGPEVTSQGVQTSSPACK.Q	14.3352	14.3792	14.5236	14.5815	14.723	14.861	14.4127	0.0804814	14.7218	0.11413	0.309143	0.0351655
AUP1_MOUSE	Ancient ubiquitous protein 1	AUP1_MOUSE_Cys146	K.KFCASTR.L	16.645	16.5569	16.5002	16.746	16.8137	16.7179	16.5674	0.0595821	16.7592	0.0401971	0.191843	0.0195237
B2MG_MOUSE	Beta-2-microglobulin	B2MG_MOUSE_Cys100	K.DWSFYILAHTEFTPTETDTYACR.V	17.0088	17.1168	16.9938	17.2086	16.9285	17.0239	17.0398	0.0547755	17.0537	0.116278	0.0138566	0.886206
B3GT6_MOUSE	Beta-1,3-galactosyltransferase 6	B3GT6_MOUSE_Cys267	R.GCNNQYLVTHK.Q	18.5213	18.6425	18.5524	18.8012	19.1499	18.7589	18.5721	0.0513931	18.9033	0.175195	0.331236	0.0622616
B4GN1_MOUSE	Beta-1,4 N-acetylgalactosaminyltransferase 1	B4GN1_MOUSE_Cys412	R.QLLSVEPGAPGLGNCFR.Q	19.2028	19.3666	19.2446	19.405	19.4486	19.2315	19.2713	0.0694911	19.3617	0.0937788	0.0903677	0.335055
BACH_MOUSE	Cytosolic acyl coenzyme A thioester hydrolase	BACH_MOUSE_Cys101	R.CVAALAR.V	19.2745	19.155	18.948	19.3564	19.3358	19.3785	19.1258	0.134899	19.3569	0.0174041	0.231056	0.0741652
BAF_MOUSE	Barrier-to-autointegration factor	BAF_MOUSE_Cys67	K.DTCGANAK.Q	13.4661	13.5548	13.8231	13.6366	13.5383	13.601	13.6146	0.15176	13.592	0.0406218	-0.0226867	0.84815
BASI_MOUSE	Basigin	BASI_MOUSE_Cys203	R.SGEYSCIFLPEPVGR.S	20.8099	20.76	20.7714	20.8536	20.9507	20.82	20.7805	0.0213462	20.8748	0.0554144	0.09434	0.0879668
BGLR_MOUSE	Beta-glucuronidase	BGLR_MOUSE_Cys165	K.LVQSGPLTTCR.I	18.6833	18.5413	18.4754	18.6573	18.5849	18.6973	18.5667	0.086789	18.6465	0.0464965	0.0798345	0.315437
BIRC6_MOUSE	Baculoviral IAP repeat-containing protein 6	BIRC6_MOUSE_Cys358	R.HSPNCPFVK.G	14.8869	15.0278	14.6176	14.8477	15.045	14.8922	14.8441	0.170156	14.9283	0.0845024	0.0842113	0.564752
BLMH_MOUSE	Bleomycin hydrolase	BLMH_MOUSE_Cys269	K.ICFVNDPRPQHK.Y	19.1694	18.8364	18.8936	19.2721	19.3789	19.1948	18.9665	0.145394	19.2819	0.0754821	0.315457	0.0528089
BLMH_MOUSE	Bleomycin hydrolase	BLMH_MOUSE_Cys40	K.LNSDPQFVLAQNVGTTHDLLDICLRR.A	15.4841	15.0844	15.203	15.2184	14.1186	15.2017	15.2571	0.167622	14.8462	0.514547	-0.41091	0.343363
BOLA2_MOUSE	BolA-like protein 2	BOLA2_MOUSE_Cys59	R.LVNECLAEELPHIHAFEQK.T	15.6164	15.587	15.6117	14.9426	15.3101	15.4387	15.6051	0.0128969	15.2305	0.210222	-0.374574	0.0656977
BPNT1_MOUSE	3'(2'),5'-bisphosphate nucleotidase 1	BPNT1_MOUSE_Cys249	K.WDTCAPEVILHAVGGK.L	16.7936	16.7382	16.8707	17.0739	16.8379	17.127	16.8008	0.0543538	17.0129	0.125652	0.212097	0.0935935
BRAP_MOUSE	BRCA1-associated protein	BRAP_MOUSE_Cys472	R.KCTQLNTR.V	16.4362	16.2572	16.0642	16.3733	16.3633	16.4292	16.2526	0.151874	16.3886	0.0289957	0.136075	0.281217
BRI3B_MOUSE	BRI3-binding protein	BRI3B_MOUSE_Cys218	R.GSPGGLCSPSVEEK.L	16.7402	16.7496	16.6681	17.0904	17.0959	17.0234	16.7193	0.036427	17.0699	0.032944	0.350618	0.000541636
C1QBP_MOUSE	Complement component 1 Q subcomponent-binding protein, mitochondrial	C1QBP_MOUSE_Cys182	K.TLVLDCHYPEDEIGHEDEAESDIFSIK.E	14.2495	14.6938	14.3497	14.646	14.6066	14.5087	14.431	0.190274	14.5871	0.0577418	0.156085	0.329186
C1TM_MOUSE	Monofunctional C1-tetrahydrofolate synthase, mitochondrial	C1TM_MOUSE_Cys905	R.YTQQGFGNLPICMAK.T	17.876	17.8775	17.8447	17.984	17.9307	17.9762	17.8661	0.0151219	17.9636	0.023515	0.0975381	0.00785102
CADM1_MOUSE	Cell adhesion molecule 1	CADM1_MOUSE_Cys270	R.EGDAFELTCEAIGKPQPVMVTWVR.V	19.7656	19.6094	19.9765	19.4243	19.5312	19.7885	19.7838	0.150424	19.5813	0.152853	-0.2025	0.252679
CADM1_MOUSE	Cell adhesion molecule 1	CADM1_MOUSE_Cys316	R.CEASNIVGK.A	20.291	20.2185	20.2028	20.0528	20.0889	20.3254	20.2374	0.0384154	20.1557	0.120883	-0.0817376	0.413671
CALR_MOUSE	Calreticulin	CALR_MOUSE_Cys105	K.FEPFSNKGQTLVVQFTVKHEQNIDCGGGYVK.L	19.6245	19.3374	19.7856	19.7597	19.8373	20.0162	19.5825	0.185358	19.8711	0.107401	0.288558	0.129502
CALR_MOUSE	Calreticulin	CALR_MOUSE_Cys137	K.DMHGDSEYNIMFGPDICGPGTK.K	15.7835	15.6424	15.1351	15.4531	15.6413	15.1844	15.5203	0.278418	15.4263	0.18746	-0.0940875	0.712027
CALX_MOUSE	Calnexin	CALX_MOUSE_Cys161	K.LNKPFLFDTKPLIVQYEVNFQNGIECGGAYVK.L	14.1676	15.2422	13.8827	15.7823	14.8043	13.8099	14.4309	0.58541	14.7989	0.805215	0.368004	0.62875
CALX_MOUSE	Calnexin	CALX_MOUSE_Cys195	K.TPYTIMFGPDKCGEDYK.L	21.4815	21.5435	21.7183	21.8337	21.864	21.6074	21.5811	0.100265	21.7683	0.114489	0.187282	0.156777
CAN2_MOUSE	Calpain-2 catalytic subunit	CAN2_MOUSE_Cys341	R.LEICNLTPDTLTCDSYKK.W	17.5366	17.3779	17.4661	17.7821	17.701	17.534	17.4602	0.0649406	17.6724	0.103301	0.212159	0.0697691
CAN2_MOUSE	Calpain-2 catalytic subunit	CAN2_MOUSE_Cys350	R.LEICNLTPDTLTCDSYKK.W	17.5366	17.3779	17.4661	17.7821	17.701	17.534	17.4602	0.0649406	17.6724	0.103301	0.212159	0.0697691
CAN2_MOUSE	Calpain-2 catalytic subunit	CAN2_MOUSE_Cys405	R.GCTFLVGLIQK.H	15.792	15.9869	15.7232	15.9807	15.7591	15.6929	15.8341	0.111688	15.8109	0.123084	-0.0231501	0.853446
CAN2_MOUSE	Calpain-2 catalytic subunit	CAN2_MOUSE_Cys640	K.LPCQLHQVIVAR.F	19.0829	18.8698	18.7029	19.1621	19.3029	19.2842	18.8852	0.155505	19.2497	0.0624371	0.364574	0.0370462
CAN2_MOUSE	Calpain-2 catalytic subunit	CAN2_MOUSE_Cys82	K.RPTEICADPQFIIGGATR.T	16.5927	16.4611	16.5021	16.6817	16.6894	16.5343	16.5186	0.0549676	16.6351	0.0713859	0.116482	0.141494
CAND1_MOUSE	Cullin-associated NEDD8-dissociated protein 1	CAND1_MOUSE_Cys131	K.TVIGELPPASSGSALAANVCKK.I	16.4989	16.5349	16.3277	16.8616	16.7275	16.6987	16.4539	0.0903871	16.7626	0.0709682	0.308756	0.01911
CAP1_MOUSE	Adenylyl cyclase-associated protein 1	CAP1_MOUSE_Cys355	K.CVNTTLQIK.G	20.5308	20.4996	20.4533	20.5496	20.646	20.6223	20.4946	0.0318307	20.606	0.0409871	0.111397	0.0385644
CAP1_MOUSE	Adenylyl cyclase-associated protein 1	CAP1_MOUSE_Cys374	K.GKINSITVDNCK.K	21.3084	21.2816	21.3526	21.4008	21.4241	21.3894	21.3142	0.0292811	21.4048	0.0144489	0.0905499	0.0172205
CAP1_MOUSE	Adenylyl cyclase-associated protein 1	CAP1_MOUSE_Cys415	K.TDGCHAYLSK.N	18.7347	18.7328	18.6561	18.9116	18.8758	18.8222	18.7079	0.0366324	18.8699	0.0367735	0.162	0.0115664
CAP1_MOUSE	Adenylyl cyclase-associated protein 1	CAP1_MOUSE_Cys92	R.ALLATASQCQQPAGNK.L	19.1682	18.8423	19.004	19.4141	19.4335	19.5812	19.0048	0.133027	19.4763	0.0746122	0.47142	0.011958
CAPR1_MOUSE	Caprin-1	CAPR1_MOUSE_Cys224	K.EKPVCGTTYK.A	19.3985	19.3889	19.5141	19.6278	19.4788	19.4702	19.4339	0.0568995	19.5256	0.0723851	0.0917382	0.231597
CATA_MOUSE	Catalase	CATA_MOUSE_Cys377	R.LGPNYLQIPVNCPYR.A	19.5681	19.2686	19.4257	19.6852	19.7188	19.8624	19.4208	0.12229	19.7555	0.0768679	0.334662	0.0305975
CATB_MOUSE	Cathepsin B	CATB_MOUSE_Cys105	R.DQGSCGSC#WAFGAVEAISDRTCIHTNGR.V	16.8934	16.5406	16.5844	17.025	17.3457	16.7347	16.6728	0.157019	17.0351	0.249519	0.362339	0.15718
CATB_MOUSE	Cathepsin B	CATB_MOUSE_Cys122	R.TCIHTNGR.V	15.5293	14.4246	14.3573	15.7894	16.681	14.8433	14.7704	0.537313	15.7712	0.75036	1.00084	0.199898
CATB_MOUSE	Cathepsin B	CATB_MOUSE_Cys207	R.CNKSCEAGYSPSYK.E	16.3288	16.2	16.6489	16.6499	16.6705	16.6068	16.3926	0.18873	16.6424	0.0265209	0.249807	0.137404
CATB_MOUSE	Cathepsin B	CATB_MOUSE_Cys211	K.SCEAGYSPSYK.E	23.0286	23.0443	23.1581	23.1436	23.1956	23.2196	23.077	0.0576762	23.1863	0.0317044	0.109292	0.0786516
CATB_MOUSE	Cathepsin B	CATB_MOUSE_Cys319	R.GENHCGIESEIVAGIPR.T	17.9521	18.2798	17.7744	18.1008	18.3493	18.6039	18.0021	0.209327	18.3513	0.205363	0.349264	0.167392
CATB_MOUSE	Cathepsin B	CATB_MOUSE_Cys93	W.SNCPTIGQIR.D	23.3327	23.3507	23.5794	23.4414	23.4577	23.5291	23.4209	0.112277	23.4761	0.0380956	0.0551509	0.546577
CATC_MOUSE	Dipeptidyl peptidase 1	CATC_MOUSE_Cys320	K.YAQDFGVVEESCFPYTAK.D	18.6872	18.4435	18.6282	18.1913	18.3918	18.6203	18.5863	0.103816	18.4011	0.175266	-0.185159	0.26801
CATC_MOUSE	Dipeptidyl peptidase 1	CATC_MOUSE_Cys330	K.DSPCKPR.E	14.7671	14.7887	14.7441	14.5668	14.5833	14.6705	14.7666	0.018229	14.6068	0.0454805	-0.159788	0.00994123
CATD_MOUSE	Cathepsin D	CATD_MOUSE_Cys117	K.ILDIACWVHHK.Y	20.1332	19.982	20.3432	20.5534	20.3597	20.4539	20.1528	0.148075	20.4557	0.0791027	0.302874	0.0632108
CATD_MOUSE	Cathepsin D	CATD_MOUSE_Cys284	K.AYWQVHMDQLEVGNELTLCK.G	20.2205	20.1352	20.5054	20.9164	20.7873	20.8299	20.287	0.158294	20.8445	0.0536871	0.557502	0.00919286
CATD_MOUSE	Cathepsin D	CATD_MOUSE_Cys288	K.GGCEAIVDTGTSLLVGPVEEVK.E	15.6289	15.7893	15.7444	15.7402	15.9402	16.0509	15.7209	0.0675548	15.9104	0.128577	0.189552	0.13869
CATD_MOUSE	Cathepsin D	CATD_MOUSE_Cys327	K.AIGAVPLIQGEYM*IPCEK.V	19.6809	19.7676	19.6456	20.3062	20.1308	20.2475	19.698	0.0512326	20.2282	0.0728838	0.530174	0.0010912
CATL1_MOUSE	Cathepsin L1	CATL1_MOUSE_Cys322	K.DRDNHCGLATAASYPVVN.-	17.2797	17.1659	17.0804	17.1233	17.1969	16.9241	17.1754	0.0816475	17.0814	0.115257	-0.0939278	0.400237
CATS_MOUSE	Cathepsin S	CATS_MOUSE_Cys134	K.GCVTEVK.Y	20.0347	20.1074	20.1842	20.1704	20.2556	20.3545	20.1087	0.0610247	20.2602	0.0752167	0.151405	0.0915617
CATS_MOUSE	Cathepsin S	CATS_MOUSE_Cys178	K.LISLSAQNLVDCSNEEK.Y	20.9563	20.9624	21.1312	21.2972	21.3332	21.1521	21.0166	0.081038	21.2608	0.0782574	0.244205	0.0374533
CATS_MOUSE	Cathepsin S	CATS_MOUSE_Cys222	K.CHYNSK.N	15.0951	14.9571	14.8752	15.0088	14.8942	15.1109	14.9758	0.0907257	15.0046	0.0885239	0.0288342	0.763792
CATZ_MOUSE	Cathepsin Z	CATZ_MOUSE_Cys156	K.HGIPDETCNNYQAK.D	21.5122	21.5493	21.5777	20.9327	20.9116	21.2241	21.5464	0.026843	21.0228	0.142603	-0.52362	0.00696706
CATZ_MOUSE	Cathepsin Z	CATZ_MOUSE_Cys35	R.SGQTCYHPIR.G	16.5188	16.4832	16.3318	16.4729	16.5675	16.6353	16.4446	0.0810534	16.5586	0.0665965	0.113958	0.199276
CBPD_MOUSE	Carboxypeptidase D	CBPD_MOUSE_Cys1046	R.AQEKDCTSK.T	17.301	17.026	17.1385	17.3855	17.5296	17.1183	17.1552	0.112861	17.3445	0.170376	0.18929	0.260397
CBX3_MOUSE	Chromobox protein homolog 3	CBX3_MOUSE_Cys160	K.CPQIVIAFYEER.L	19.2867	19.4049	19.3024	19.2901	19.4573	19.4523	19.3313	0.0524034	19.3999	0.0776727	0.0685667	0.359175
CCD25_MOUSE	Coiled-coil domain-containing protein 25	CCD25_MOUSE_Cys83	K.ANSIQGCK.M	17.9599	17.9362	17.9466	18.1287	18.1731	18.0283	17.9476	0.00972466	18.11	0.0605823	0.162462	0.0200422
CD027_MOUSE	UPF0609 protein C4orf27 homolog	CD027_MOUSE_Cys17	R.TAGAGPQCEK.T	14.7839	14.7211	14.6823	14.8303	14.8368	15.0158	14.7291	0.0418716	14.8943	0.0859355	0.165232	0.0708685
CD14_MOUSE	Monocyte differentiation antigen CD14	CD14_MOUSE_Cys213	R.GLISALCPLK.F	12.776	12.5135	12.0942	12.2545	12.7266	12.1809	12.4613	0.280787	12.3873	0.241792	-0.0739227	0.791839
CD166_MOUSE	CD166 antigen	CD166_MOUSE_Cys354	K.QIGDTLPVSCTISASR.N	19.4784	19.4269	19.4108	19.623	19.6083	19.9381	19.4387	0.0288431	19.7231	0.152097	0.284431	0.0601521
CD180_MOUSE	CD180 antigen	CD180_MOUSE_Cys28	A.TTSSDQKCIEK.E	16.7221	16.6294	16.4531	16.4042	16.6636	16.6753	16.6015	0.111587	16.581	0.125146	-0.0204938	0.871159
CD180_MOUSE	CD180 antigen	CD180_MOUSE_Cys365	R.LELGTGCLENLENLR.E	19.8863	19.8489	19.8799	20.3071	20.3864	20.2641	19.8717	0.0163345	20.3192	0.0506592	0.447475	0.00028665
CD180_MOUSE	CD180 antigen	CD180_MOUSE_Cys387	R.ELDLSHDDIETSDCCNLQLR.N	16.8536	16.9325	16.8657	16.8392	17.0548	17.0546	16.8839	0.0346728	16.9829	0.101591	0.0989643	0.262271
CD180_MOUSE	CD180 antigen	CD180_MOUSE_Cys388	R.ELDLSHDDIETSDCCNLQLR.N	16.8536	16.9325	16.8657	16.8392	17.0548	17.0546	16.8839	0.0346728	16.9829	0.101591	0.0989643	0.262271
CD36_MOUSE	Platelet glycoprotein 4	CD36_MOUSE_Cys311	R.FVLPANAFASPLQNPDNHCFCTEK.V	18.4408	18.4529	18.4877	18.9563	19.1054	19.0016	18.4605	0.0198504	19.0211	0.062434	0.560624	0.000267436
CD36_MOUSE	Platelet glycoprotein 4	CD36_MOUSE_Cys313	R.FVLPANAFASPLQNPDNHCFCTEK.V	18.4408	18.4529	18.4877	18.9563	19.1054	19.0016	18.4605	0.0198504	19.0211	0.062434	0.560624	0.000267436
CD68_MOUSE	Macrosialin	CD68_MOUSE_Cys22	G.TEEDCPHK.K	15.3586	15.3305	15.261	15.0787	15.3505	15.3447	15.3167	0.0410296	15.258	0.126772	-0.0587306	0.566843
CD68_MOUSE	Macrosialin	CD68_MOUSE_Cys283	K.GHFGPCFSCNR.D	15.8485	15.4511	15.653	15.9859	15.7565	15.9822	15.6509	0.162264	15.9082	0.107275	0.257361	0.13466
CD68_MOUSE	Macrosialin	CD68_MOUSE_Cys286	K.GHFGPCFSCNR.D	15.8485	15.4511	15.653	15.9859	15.7565	15.9822	15.6509	0.162264	15.9082	0.107275	0.257361	0.13466
CDC37_MOUSE	Hsp90 co-chaperone Cdc37	CDC37_MOUSE_Cys64	R.KVAECQR.K	16.6321	16.5367	16.5984	16.4854	16.4994	16.5267	16.5891	0.0395188	16.5038	0.0171548	-0.0852327	0.0489171
CDC42_MOUSE	Cell division control protein 42 homolog	CDC42_MOUSE_Cys157	K.YVECSALTQK.G	21.196	20.9634	21.0418	21.1561	21.0181	21.1772	21.0671	0.0966289	21.1171	0.0705306	0.0500122	0.586169
CDC42_MOUSE	Cell division control protein 42 homolog	CDC42_MOUSE_Cys6	K.CVVVGDGAVGK.T	22.619	22.5993	22.6416	22.6493	22.6427	22.5508	22.6199	0.0172777	22.6143	0.044939	-0.00565767	0.876073
CELF2_MOUSE	CUGBP Elav-like family member 2	CELF2_MOUSE_Cys143	K.KCNENDIR.V	14.2494	14.2351	14.0712	14.3143	14.3668	14.4737	14.1852	0.0808443	14.3849	0.0663044	0.1997	0.0540321
CH60_MOUSE	60 kDa heat shock protein, mitochondrial	CH60_MOUSE_Cys237	K.GQKCEFQDAYVLLSEK.K	18.5635	18.6568	18.4727	18.759	18.4809	18.5042	18.5643	0.0751702	18.5814	0.125966	0.0170195	0.877623
CH60_MOUSE	60 kDa heat shock protein, mitochondrial	CH60_MOUSE_Cys442	R.AAVEEGIVLGGGCALLR.C	19.7573	19.7296	19.7991	19.864	19.9044	19.9947	19.762	0.0285642	19.921	0.0546393	0.15906	0.0218017
CH60_MOUSE	60 kDa heat shock protein, mitochondrial	CH60_MOUSE_Cys447	R.CIPALDSLKPANEDQK.I	20.4619	20.4778	20.4652	20.5336	20.5101	20.5656	20.4683	0.00684078	20.5364	0.0227399	0.0681478	0.0153676
CHERP_MOUSE	Calcium homeostasis endoplasmic reticulum protein	CHERP_MOUSE_Cys190	K.SPPHCELMAGHLR.N	14.7356	14.8571	14.7796	15.031	14.9005	14.9969	14.7907	0.0502233	14.9762	0.0552539	0.185407	0.0246365
CHERP_MOUSE	Calcium homeostasis endoplasmic reticulum protein	CHERP_MOUSE_Cys69	K.LALEQQQLICK.Q	17.7371	17.5565	17.6848	17.8361	17.9605	17.9488	17.6595	0.0758692	17.9152	0.0560721	0.255689	0.0185721
CHIP_MOUSE	STIP1 homology and U box-containing protein 1	CHIP_MOUSE_Cys200	R.AQQACIEAK.H	17.7707	17.5728	17.6736	17.7218	17.6609	17.9025	17.6724	0.0808251	17.7617	0.102572	0.0893632	0.38797
CISD1_MOUSE	CDGSH iron-sulfur domain-containing protein 1	CISD1_MOUSE_Cys83	K.FPFCDGAHIK.H	19.4554	19.4525	19.2805	19.8487	19.6734	19.6615	19.3961	0.0817581	19.7279	0.0856065	0.331722	0.0166356
CISD2_MOUSE	CDGSH iron-sulfur domain-containing protein 2	CISD2_MOUSE_Cys110	K.TFPACDGSHNK.H	14.9544	14.5787	14.0662	14.6929	14.3453	14.7517	14.5331	0.364051	14.5966	0.179337	0.063509	0.835686
CK5P3_MOUSE	CDK5 regulatory subunit-associated protein 3	CK5P3_MOUSE_Cys165	R.EQFYHSCK.Q	16.171	15.9308	15.8357	16.074	16.2274	16.3431	15.9792	0.141072	16.2149	0.110219	0.235697	0.136099
CL12A_MOUSE	C-type lectin domain family 12 member A	CL12A_MOUSE_Cys118	K.NLSAMLQSTATQLCR.E	17.2245	17.4027	17.4751	17.3905	17.5961	17.5375	17.3674	0.10529	17.508	0.0864828	0.140601	0.218241
CLCA_MOUSE	Clathrin light chain A	CLCA_MOUSE_Cys205	R.LCDFNPK.S	22.2456	22.1076	22.3427	22.0575	21.9656	21.9326	22.232	0.0964715	21.9852	0.0528332	-0.246756	0.0337715
CLCB_MOUSE	Clathrin light chain B	CLCB_MOUSE_Cys199	K.VAQLCDFNPK.S	19.4554	19.4206	19.4865	19.4349	19.4992	19.5007	19.4542	0.0269107	19.4783	0.0306564	0.024089	0.45062
CLH1_MOUSE	Clathrin heavy chain 1	CLH1_MOUSE_Cys491	K.VIQCFAETGQVQK.I	11.7164	11.3575	11.9049	11.9046	12.0481	12.3422	11.6596	0.227061	12.0983	0.18214	0.438691	0.100058
CLH1_MOUSE	Clathrin heavy chain 1	CLH1_MOUSE_Cys617	R.AHIAQLCEK.A	20.9425	20.9361	20.6096	21.1427	21.1094	20.8057	20.8294	0.155479	21.0192	0.151617	0.189824	0.28403
CLH1_MOUSE	Clathrin heavy chain 1	CLH1_MOUSE_Cys682	R.QNLQICVQVASK.Y	18.8715	18.9415	18.5612	19.0451	19.1505	19.0868	18.7914	0.165254	19.0941	0.0433137	0.302735	0.0663326
CLH1_MOUSE	Clathrin heavy chain 1	CLH1_MOUSE_Cys736	K.YIQAACK.T	22.3975	22.4824	21.9682	22.7709	22.6169	22.4843	22.2827	0.225084	22.624	0.117097	0.341325	0.129863
CLH1_MOUSE	Clathrin heavy chain 1	CLH1_MOUSE_Cys753	R.ESNCYDPER.V	13.9805	14.0925	14.0033	14.3851	14.2929	14.0906	14.0254	0.0483221	14.2562	0.123002	0.230765	0.068985
CLH1_MOUSE	Clathrin heavy chain 1	CLH1_MOUSE_Cys918	K.RDPHLACVAYER.G	15.5838	15.8142	15.4577	16.2294	15.9347	15.8367	15.6186	0.14759	16.0002	0.166882	0.381678	0.0725383
CLIC1_MOUSE	Chloride intracellular channel protein 1	CLIC1_MOUSE_Cys178	R.KFLDGNELTLADCNLLPK.L	19.3957	19.0992	19.2691	18.9084	19.3033	19.5658	19.2547	0.121448	19.2592	0.270217	0.00449407	0.983912
CLIC1_MOUSE	Chloride intracellular channel protein 1	CLIC1_MOUSE_Cys191	K.LHIVQVVCK.K	18.6124	18.2511	18.2205	18.3771	18.4644	18.2417	18.3613	0.177963	18.3611	0.0916311	-0.000251293	0.998668
CLIC1_MOUSE	Chloride intracellular channel protein 1	CLIC1_MOUSE_Cys24	K.IGNCPFSQR.L	19.3052	19.322	19.3372	19.3684	19.3819	19.3996	19.3215	0.0130959	19.3833	0.0127476	0.0618395	0.00874188
CLIC4_MOUSE	Chloride intracellular channel protein 4	CLIC4_MOUSE_Cys189	R.FLDGDEMTLADCNLLPK.L	19.4602	19.4506	19.5262	19.577	19.6401	19.4528	19.479	0.0336054	19.5566	0.0778142	0.0776172	0.265002
CLIC4_MOUSE	Chloride intracellular channel protein 4	CLIC4_MOUSE_Cys234	R.DEFTNTCPSDKEVEIAYSDVAK.R	16.9732	17.0184	16.8415	17.0792	16.8806	17.1621	16.9443	0.0750329	17.0406	0.118135	0.0962819	0.385672
CLIP1_MOUSE	CAP-Gly domain-containing linker protein 1	CLIP1_MOUSE_Cys264	R.YFQCQPK.Y	19.7432	19.7791	19.965	19.8155	19.9886	20.075	19.8291	0.0971911	19.9597	0.107914	0.130597	0.272382
CLU_MOUSE	Clustered mitochondria protein homolog	CLU_MOUSE_Cys1198	K.CLTQQAVALQR.T	17.8471	17.8992	17.8176	18.0914	18.1165	18.1014	17.8546	0.0337442	18.1031	0.010336	0.248467	0.000571547
CNBP_MOUSE	Cellular nucleic acid-binding protein	CNBP_MOUSE_Cys102	R.EQCCYNCGKPGHLAR.D	19.3723	19.2942	19.4452	19.288	19.3142	19.4125	19.3705	0.0616574	19.3382	0.0536036	-0.0323075	0.605833
CNBP_MOUSE	Cellular nucleic acid-binding protein	CNBP_MOUSE_Cys123	K.C#YSCGEFGHIQK.D	20.1529	20.0032	20.1298	19.8856	20.0413	20.2654	20.0953	0.0658047	20.0641	0.155904	-0.0312006	0.807162
CNBP_MOUSE	Cellular nucleic acid-binding protein	CNBP_MOUSE_Cys151	R.C#GETGHVAINCSK.T	17.6647	17.5555	17.7435	17.6626	17.652	17.724	17.6546	0.0771069	17.6795	0.0317231	0.0249856	0.693512
CNBP_MOUSE	Cellular nucleic acid-binding protein	CNBP_MOUSE_Cys159	K.TSEVNCYR.C	19.0146	18.9384	19.0043	18.7064	18.616	18.8503	18.9857	0.0337556	18.7242	0.0964584	-0.261494	0.0223833
CNBP_MOUSE	Cellular nucleic acid-binding protein	CNBP_MOUSE_Cys54	R.GFQFVSSSLPDICYR.C	21.9674	21.9946	22.1003	21.7937	21.6806	21.8092	22.0208	0.0573332	21.7612	0.057341	-0.259605	0.0105959
CNBP_MOUSE	Cellular nucleic acid-binding protein	CNBP_MOUSE_Cys98	R.EQCCYNCGKPGHLAR.D	20.1937	20.1743	20.2954	20.0383	20.0595	20.2119	20.2211	0.0530806	20.1032	0.0773267	-0.117897	0.15009
CNBP_MOUSE	Cellular nucleic acid-binding protein	CNBP_MOUSE_Cys99	R.EQC#CYNCGKPGHLAR.D	20.114	19.7973	20.035	19.7711	19.8762	20.0379	19.9821	0.134583	19.8951	0.10972	-0.0870291	0.517569
CND1_MOUSE	Condensin complex subunit 1	CND1_MOUSE_Cys806	R.LAQQVCLAIANISDR.R	15.2812	15.372	15.6588	15.6375	15.5551	15.6728	15.4373	0.160906	15.6218	0.0492875	0.184445	0.196073
CO3_MOUSE	Complement C3	CO3_MOUSE_Cys1537	K.ACEPGVDYVYK.T	18.5374	18.5563	18.4677	18.9207	19.2856	19.063	18.5205	0.0380837	19.0898	0.150176	0.569312	0.0065307
COF1_MOUSE	Cofilin-1	COF1_MOUSE_Cys139	K.LTGIKHELQANCYEEVKDR.C	16.1667	16.0351	15.9714	16.0168	16.2757	16.3208	16.0577	0.0812907	16.2044	0.133939	0.146708	0.256026
COF1_MOUSE	Cofilin-1	COF1_MOUSE_Cys39	K.AVLFCLSEDKK.N	22.0136	21.8626	21.9669	21.7791	21.8946	21.9251	21.9477	0.0630986	21.8663	0.0628911	-0.0813885	0.265954
COF1_MOUSE	Cofilin-1	COF1_MOUSE_Cys80	K.MLPDKDCR.Y	20.7578	20.9355	21.0931	20.7197	20.7372	20.6114	20.9288	0.13697	20.6895	0.0556411	-0.23936	0.0838866
COL12_MOUSE	Collectin-12	COL12_MOUSE_Cys371	R.TTCTDTLTR.H	19.1635	19.0835	19.1208	18.5532	18.6772	18.8286	19.1226	0.0327205	18.6863	0.112632	-0.436254	0.00625373
COPA_MOUSE	Coatomer subunit alpha	COPA_MOUSE_Cys522	R.KLDALCNIHENIR.V	15.9499	14.9668	15.3336	16.3358	15.3857	15.5693	15.4168	0.405638	15.7636	0.41149	0.346783	0.443822
COPB2_MOUSE	Coatomer subunit beta'	COPB2_MOUSE_Cys190	K.GVNCIDYYSGGDKPYLISGADDR.L	16.7895	16.643	16.5573	17.1002	17.2122	16.7972	16.6632	0.0958812	17.0365	0.175288	0.373321	0.0574331
COPB2_MOUSE	Coatomer subunit beta'	COPB2_MOUSE_Cys741	K.LDACLELLIR.T	18.1908	18.4404	18.201	18.5658	18.4951	18.517	18.2774	0.115336	18.526	0.0295558	0.248574	0.0418635
COPD_MOUSE	Coatomer subunit delta	COPD_MOUSE_Cys441	R.NTLEWCLPVIDAK.N	16.7539	16.6098	16.6186	16.9087	16.4411	16.8995	16.6608	0.0659433	16.7498	0.218286	0.0890149	0.610299
COR1A_MOUSE	Coronin-1A	COR1A_MOUSE_Cys332	R.GLEVNKCEIAR.F	19.8008	19.6604	19.837	19.5693	19.4718	19.6257	19.7661	0.0761669	19.5556	0.0635883	-0.210482	0.0399408
COX5B_MOUSE	Cytochrome c oxidase subunit 5B, mitochondrial	COX5B_MOUSE_Cys112	R.CPNCGTHYK.L	21.091	21.0042	20.9231	21.1147	21.1759	21.1899	21.0061	0.0685702	21.1602	0.0326347	0.154063	0.0455105
COX5B_MOUSE	Cytochrome c oxidase subunit 5B, mitochondrial	COX5B_MOUSE_Cys115	R.CPNCGTHYK.L	18.4957	18.5312	18.7612	18.5852	18.9127	18.8195	18.596	0.117686	18.7725	0.137762	0.176449	0.240485
CPIN1_MOUSE	Anamorsin	CPIN1_MOUSE_Cys116	K.LCSALTLSGLVEIK.E	17.4832	17.2895	17.1003	17.5748	17.3864	17.8551	17.291	0.156307	17.6054	0.192582	0.314455	0.147444
CPIN1_MOUSE	Anamorsin	CPIN1_MOUSE_Cys271	K.SACGNCYLGDAFR.C	19.7555	19.8328	19.8588	19.9606	19.9913	20.1326	19.8157	0.0438893	20.0281	0.0748884	0.212457	0.0257836
CPIN1_MOUSE	Anamorsin	CPIN1_MOUSE_Cys274	K.SACGNCYLGDAFR.C	19.7555	19.8328	19.8588	19.9606	19.9913	20.1326	19.8157	0.0438893	20.0281	0.0748884	0.212457	0.0257836
CPIN1_MOUSE	Anamorsin	CPIN1_MOUSE_Cys92	R.ILRPGGCLFLK.E	18.8606	18.8203	18.8407	19.0878	19.1355	19.325	18.8405	0.0164617	19.1828	0.102461	0.342252	0.00956032
CPPED_MOUSE	Calcineurin-like phosphoesterase domain-containing protein 1	CPPED_MOUSE_Cys88	K.FFVLCGDLVHAMPGTPWR.Q	17.4832	17.5487	17.6267	17.6818	17.4181	17.7044	17.5529	0.0586486	17.6014	0.129941	0.0485489	0.655253
CR1L_MOUSE	Complement component receptor 1-like protein	CR1L_MOUSE_Cys141	K.QDSTWTSAEDKCIRKQCK.T	14.7155	14.9704	15.3684	14.9677	15.3245	15.2452	15.0181	0.268686	15.1791	0.152987	0.161054	0.502202
CR1L_MOUSE	Complement component receptor 1-like protein	CR1L_MOUSE_Cys146	K.QDSTWTSAEDKCIRKQCK.T	14.7155	14.9704	15.3684	14.9677	15.3245	15.2452	15.0181	0.268686	15.1791	0.152987	0.161054	0.502202
CRIP1_MOUSE	Cysteine-rich protein 1	CRIP1_MOUSE_Cys28	R.VTSLGKDWHRPCLK.C	16.5187	15.8968	16.1616	15.997	16.4734	16.0135	16.1924	0.254839	16.1613	0.220803	-0.0310976	0.902525
CRIP1_MOUSE	Cysteine-rich protein 1	CRIP1_MOUSE_Cys7	K.CDKEVYFAER.V	22.8234	22.2462	21.7372	22.408	22.415	22.6352	22.2689	0.443718	22.486	0.105472	0.217111	0.537704
CSDE1_MOUSE	Cold shock domain-containing protein E1	CSDE1_MOUSE_Cys506	K.QRPGQQIATCVR.L	16.8747	16.8869	16.8433	17.1599	17.0767	17.209	16.8683	0.018329	17.1485	0.0546133	0.280236	0.00233924
CSK2B_MOUSE	Casein kinase II subunit beta	CSK2B_MOUSE_Cys109	K.YQQGDFGYCPR.V	18.6084	18.4711	18.6179	18.6469	18.5959	18.6568	18.5658	0.0670602	18.6332	0.026674	0.0673479	0.257394
CSK2B_MOUSE	Casein kinase II subunit beta	CSK2B_MOUSE_Cys140	K.CMDVYTPK.S	19.2696	19.1553	19.1495	19.2961	19.4045	19.4643	19.1914	0.0552852	19.3883	0.0696211	0.196861	0.0351316
CTBP1_MOUSE	C-terminal-binding protein 1	CTBP1_MOUSE_Cys38	R.DCTVEMPILK.D	13.0009	13.7983	13.5694	13.5499	13.9898	13.5392	13.4562	0.33525	13.693	0.209962	0.236768	0.444959
CTBP2_MOUSE	C-terminal-binding protein 2	CTBP2_MOUSE_Cys318	K.DAPNLICTPHTAWYSEQASLEMR.E	11.5477	11.9345	11.3599	11.6224	11.6817	11.7169	11.614	0.239237	11.6737	0.0390027	0.0596502	0.745369
CTDP1_MOUSE	RNA polymerase II subunit A C-terminal domain phosphatase	CTDP1_MOUSE_Cys114	R.LEGCSHPVVMK.G	18.4465	18.2535	18.1013	18.2821	18.3774	18.3212	18.2671	0.141268	18.3269	0.0390958	0.0597984	0.594891
CTL1_MOUSE	Choline transporter-like protein 1	CTL1_MOUSE_Cys97	K.YVFFLDPCNLDLINR.K	15.8536	15.8489	16.1934	16.1191	16.1321	15.9698	15.9653	0.161297	16.0737	0.0736123	0.108361	0.436162
CTND1_MOUSE	Catenin delta-1	CTND1_MOUSE_Cys516	R.EPNEDCKPR.H	14.1499	14.0947	14.0888	14.1751	14.179	14.1901	14.1112	0.0275334	14.1814	0.00638273	0.0702309	0.0245801
CTU1_MOUSE	Cytoplasmic tRNA 2-thiolation protein 1	CTU1_MOUSE_Cys287	R.LALAPAAKPPPPGTCSR.C	18.1636	17.6733	17.9954	18.1574	18.2412	18.1125	17.9441	0.203443	18.1704	0.0533682	0.226259	0.202821
CTU2_MOUSE	Cytoplasmic tRNA 2-thiolation protein 2	CTU2_MOUSE_Cys266	R.VHGYCK.V	15.4803	15.8224	15.5568	15.7733	15.6455	15.9622	15.6198	0.146608	15.7937	0.130088	0.173883	0.277924
CUL1_MOUSE	Cullin-1	CUL1_MOUSE_Cys496	K.QACGFEYTSK.L	17.958	17.9058	17.7939	18.1753	18.1932	17.995	17.8859	0.0684596	18.1212	0.0895306	0.235292	0.0418686
CUL4A_MOUSE	Cullin-4A	CUL4A_MOUSE_Cys633	R.TLQSLACGK.A	20.0272	19.7526	19.7293	20.2176	20.2587	20.102	19.8364	0.135275	20.1927	0.066354	0.356376	0.0287033
CY1_MOUSE	Cytochrome c1, heme protein, mitochondrial	CY1_MOUSE_Cys139	R.HLVGVCYTEEEAK.A	14.1148	13.4628	12.8558	14.2887	14.3168	13.9807	13.4778	0.514102	14.1954	0.152252	0.717574	0.131344
CYTB_MOUSE	Cystatin-B	CYTB_MOUSE_Cys64	K.VDVGGDKCVHLR.V	17.7234	17.5583	17.607	17.6991	17.9044	17.4811	17.6296	0.0692642	17.6948	0.172818	0.0652616	0.646091
CYTSB_MOUSE	Cytospin-B	CYTSB_MOUSE_Cys138	K.LGSSPTSSCNPTPTK.H	16.7088	16.8187	16.6984	16.5208	16.4647	16.6535	16.742	0.0544383	16.5463	0.0791848	-0.195648	0.0450403
DAB2_MOUSE	Disabled homolog 2	DAB2_MOUSE_Cys263	R.ENPFLTNGVTSCSLPR.P	17.818	17.6635	17.6338	17.8098	17.8375	18.0796	17.7051	0.0807486	17.9089	0.121189	0.203837	0.118868
DDB1_MOUSE	DNA damage-binding protein 1	DDB1_MOUSE_Cys378	R.QGQGQLVTCSGAFK.E	18.5883	18.5738	18.4943	18.7675	18.7843	18.7097	18.5521	0.0412972	18.7538	0.0319304	0.201694	0.00545527
DDIT3_MOUSE	DNA damage-inducible transcript 3 protein	DDIT3_MOUSE_Cys110	K.QSGQCPARPGK.Q	11.8557	11.9837	11.8215	12.9915	13.0688	13.2574	11.887	0.0697879	13.1059	0.111705	1.21891	0.000196789
DDX17_MOUSE	Probable ATP-dependent RNA helicase DDX17	DDX17_MOUSE_Cys219	R.GVEICIATPGR.L	20.7821	20.6957	20.7236	21.286	21.2977	21.3148	20.7338	0.035995	21.2995	0.0118331	0.565701	2.97426e-05
DDX21_MOUSE	Nucleolar RNA helicase 2	DDX21_MOUSE_Cys531	K.KDAQELSQNTCIK.Q	15.6264	15.7306	15.6758	16.4694	16.4131	16.4768	15.6776	0.0425486	16.4531	0.0284544	0.775492	2.80619e-05
DDX3L_MOUSE	Putative ATP-dependent RNA helicase Pl10	DDX3L_MOUSE_Cys222	R.DLMACAQTGSGK.T	17.9008	17.7732	17.8548	17.9535	17.9491	17.8679	17.8429	0.0527593	17.9235	0.0393796	0.0805802	0.158507
DDX3X_MOUSE	ATP-dependent RNA helicase DDX3X	DDX3X_MOUSE_Cys298	R.VRPCVVYGGAEIGQQIR.D	17.4545	17.3306	17.4167	17.3844	17.5319	17.491	17.4006	0.0518291	17.4691	0.0621893	0.0685206	0.297399
DDX5_MOUSE	Probable ATP-dependent RNA helicase DDX5	DDX5_MOUSE_Cys234	R.LIDFLECGK.T	15.4121	15.8109	15.9972	16.752	16.5585	16.0263	15.7401	0.244069	16.4456	0.306814	0.705561	0.0636347
DHB11_MOUSE	Estradiol 17-beta-dehydrogenase 11	DHB11_MOUSE_Cys94	K.LGAQAHPFVVDCSQR.E	14.4629	14.234	14.6135	14.75	14.6307	14.6826	14.4368	0.156054	14.6878	0.0488198	0.250965	0.0957472
DHB4_MOUSE	Peroxisomal multifunctional enzyme type 2	DHB4_MOUSE_Cys175	K.LGILGLCNTLAIEGR.K	15.5232	15.8633	15.5871	16.0631	15.9861	15.7076	15.6579	0.147624	15.9189	0.152715	0.261074	0.157155
DHB4_MOUSE	Peroxisomal multifunctional enzyme type 2	DHB4_MOUSE_Cys189	R.KNNIHCNTIAPNAGSR.M	14.5953	14.4991	14.5339	14.7098	14.922	14.3841	14.5428	0.0397657	14.672	0.221217	0.12922	0.461808
DHE3_MOUSE	Glutamate dehydrogenase 1, mitochondrial	DHE3_MOUSE_Cys172	K.CAVVDVPFGGAK.A	20.6002	20.4053	20.2491	20.5472	20.5319	20.5563	20.4182	0.143604	20.5451	0.010048	0.126947	0.280387
DHSA_MOUSE	Succinate dehydrogenase [ubiquinone] flavoprotein subunit, mitochondrial	DHSA_MOUSE_Cys654	K.TLNEADCATVPPAIR.S	16.9275	16.8702	17.0721	16.991	16.9578	17.0129	16.9566	0.084933	16.9872	0.0226679	0.0306405	0.647891
DHSA_MOUSE	Succinate dehydrogenase [ubiquinone] flavoprotein subunit, mitochondrial	DHSA_MOUSE_Cys89	R.AAFGLSEAGFNTACLTK.L	18.0347	17.9929	17.9334	17.9488	17.9201	17.9203	17.987	0.0415484	17.9297	0.0135014	-0.0572668	0.137382
DHSB_MOUSE	Succinate dehydrogenase [ubiquinone] iron-sulfur subunit, mitochondrial	DHSB_MOUSE_Cys70	K.CGPMVLDALIK.I	20.4949	20.5156	20.4957	20.3335	20.3858	20.5087	20.5021	0.00955689	20.4093	0.0734428	-0.0927581	0.151225
DHX15_MOUSE	Putative pre-mRNA-splicing factor ATP-dependent RNA helicase DHX15	DHX15_MOUSE_Cys774	K.IAPQYYDMSNFPQCEAK.R	17.6229	17.7106	17.5516	17.8153	17.6785	17.6444	17.6284	0.0650344	17.7127	0.0738405	0.0843815	0.291939
DIAP1_MOUSE	Protein diaphanous homolog 1	DIAP1_MOUSE_Cys258	K.LLSALCILPQPEDMNER.V	16.4874	16.7389	16.5054	16.8197	16.8284	16.6671	16.5772	0.114539	16.7717	0.0740597	0.1945	0.113931
DJB11_MOUSE	DnaJ homolog subfamily B member 11	DJB11_MOUSE_Cys193	R.FQMTQEVVCDECPNVK.L	17.9463	18.0177	17.853	17.9334	18.0989	18.1794	17.939	0.067418	18.0706	0.102385	0.131562	0.203686
DJB11_MOUSE	DnaJ homolog subfamily B member 11	DJB11_MOUSE_Cys196	R.FQMTQEVVCDECPNVK.L	17.9463	18.0177	17.853	17.9334	18.0989	18.1794	17.939	0.067418	18.0706	0.102385	0.131562	0.203686
DLDH_MOUSE	Dihydrolipoyl dehydrogenase, mitochondrial	DLDH_MOUSE_Cys477	R.VLGAHILGPGAGEMVNEAALALEYGASCEDIAR.V	15.3241	14.7172	14.9798	15.2424	15.3398	15.4336	15.007	0.248483	15.3386	0.0780576	0.331556	0.146192
DLDH_MOUSE	Dihydrolipoyl dehydrogenase, mitochondrial	DLDH_MOUSE_Cys80	T.LGGTCLNVGCIPSK.A	21.5369	21.5642	21.6137	21.6859	21.7579	21.7273	21.5716	0.0317746	21.7237	0.0294681	0.152105	0.00768546
DLDH_MOUSE	Dihydrolipoyl dehydrogenase, mitochondrial	DLDH_MOUSE_Cys85	T.LGGTCLNVGCIPSK.A	21.5369	21.5642	21.6137	21.6859	21.7579	21.7273	21.5716	0.0317746	21.7237	0.0294681	0.152105	0.00768546
DNJA2_MOUSE	DnaJ homolog subfamily A member 2	DNJA2_MOUSE_Cys143	K.NVLCSACSGQGGK.S	20.1296	19.8596	19.706	20.1828	20.1406	20.229	19.8984	0.175087	20.1842	0.0360823	0.285774	0.0866091
DNJA2_MOUSE	DnaJ homolog subfamily A member 2	DNJA2_MOUSE_Cys146	K.NVLCSACSGQGGK.S	19.7275	19.4512	19.3474	19.8299	19.7681	19.8084	19.5087	0.160406	19.8021	0.0256427	0.293416	0.0630076
DNJB4_MOUSE	DnaJ homolog subfamily B member 4	DNJB4_MOUSE_Cys175	K.VSLEEIYSGCTK.R	18.5777	18.5633	18.4716	18.6751	18.6407	18.7525	18.5376	0.0469955	18.6894	0.0467641	0.15183	0.0317131
DNJC2_MOUSE	DnaJ homolog subfamily C member 2	DNJC2_MOUSE_Cys276	R.TLVDNAYSCDPR.I	11.8079	11.4403	11.0331	11.2649	10.9887	11.4052	11.4271	0.316423	11.2196	0.173021	-0.207538	0.461405
DNJC7_MOUSE	DnaJ homolog subfamily C member 7	DNJC7_MOUSE_Cys175	R.ALEFAPACHR.F	15.2104	13.9266	13.9376	14.415	15.1089	14.9047	14.3582	0.60262	14.8095	0.291183	0.451342	0.394242
DNJC7_MOUSE	DnaJ homolog subfamily C member 7	DNJC7_MOUSE_Cys58	K.AIDMCPNNASYYGNR.A	17.2162	16.9867	17.0713	17.0597	17.1872	17.36	17.0914	0.0947785	17.2023	0.123058	0.11093	0.369632
DNMT1_MOUSE	DNA (cytosine-5)-methyltransferase 1	DNMT1_MOUSE_Cys1005	R.IKEIHCGK.K	16.5774	16.2257	16.5059	17.0063	17.0039	16.7064	16.4363	0.151756	16.9056	0.140827	0.469233	0.0327354
DNMT1_MOUSE	DNA (cytosine-5)-methyltransferase 1	DNMT1_MOUSE_Cys927	R.VYCSSITK.N	19.5762	19.6362	19.5064	20.0888	20.0027	20.0115	19.5729	0.0530694	20.0343	0.0386589	0.461408	0.000575603
DOHH_MOUSE	Deoxyhypusine hydroxylase	DOHH_MOUSE_Cys201	K.EAALALAEGLQCGSALFR.H	16.4365	16.4203	16.4508	16.8776	16.5173	16.6724	16.4359	0.0124339	16.6891	0.147552	0.253219	0.0728891
DOPP1_MOUSE	Dolichyldiphosphatase 1	DOPP1_MOUSE_Cys86	R.PCGGPHTAVGTK.Y	12.0413	12.3171	11.6756	12.6209	12.3966	12.3708	12.0113	0.262774	12.4628	0.112313	0.451423	0.0892141
DPH7_MOUSE	Diphthamide biosynthesis protein 7	DPH7_MOUSE_Cys417	K.DCSSSSVK.T	15.1575	14.9695	15.0317	15.125	15.1508	15.17	15.0529	0.0781956	15.1486	0.0184595	0.0957179	0.167309
DPOD3_MOUSE	DNA polymerase delta subunit 3	DPOD3_MOUSE_Cys129	K.SNLQNCSK.F	17.311	17.2288	17.1338	17.2606	17.2319	17.3794	17.2245	0.0724188	17.2907	0.0638647	0.0661333	0.387585
DPYL2_MOUSE	Dihydropyrimidinase-related protein 2	DPYL2_MOUSE_Cys504	R.GLYDGPVCEVSVTPK.T	18.3883	18.2905	18.2935	18.3245	18.3826	18.4821	18.3241	0.0453916	18.3964	0.0650478	0.0722788	0.266993
DX39A_MOUSE	ATP-dependent RNA helicase DDX39A	DX39A_MOUSE_Cys164	K.NCPHVVVGTPGR.I	17.7181	17.784	17.6246	18.0192	17.9594	17.8608	17.7089	0.0653989	17.9465	0.0652773	0.237532	0.0220538
DX39B_MOUSE	Spliceosome RNA helicase Ddx39b	DX39B_MOUSE_Cys165	K.NCPHIVVGTPGR.I	17.7466	17.736	17.7198	17.7636	17.844	17.7941	17.7341	0.0110271	17.8005	0.0331271	0.0663971	0.0546897
DYHC1_MOUSE	Cytoplasmic dynein 1 heavy chain 1	DYHC1_MOUSE_Cys1975	R.MLSAVSQQVQCIQEALR.E	16.7428	16.4749	16.8808	16.8881	16.7056	17.093	16.6995	0.168506	16.8956	0.158246	0.19611	0.296432
DYHC1_MOUSE	Cytoplasmic dynein 1 heavy chain 1	DYHC1_MOUSE_Cys4568	K.LQGATCSNNK.L	16.0275	16.0799	15.9396	16.2424	16.219	16.1365	16.0157	0.0578797	16.1993	0.0454366	0.183635	0.0242458
DYL1_MOUSE	Dynein light chain 1, cytoplasmic	DYL1_MOUSE_Cys24	K.NADMSEEMQQDSVECATQALEK.Y	17.0019	17.0326	17.1421	17.2166	17.5271	17.3395	17.0589	0.0601586	17.3611	0.127663	0.302187	0.0388504
DYL1_MOUSE	Dynein light chain 1, cytoplasmic	DYL1_MOUSE_Cys56	K.YNPTWHCIVGR.N	18.4419	18.4001	18.3287	18.554	18.5266	18.4974	18.3902	0.0467372	18.526	0.0230898	0.135751	0.0211525
ECHM_MOUSE	Enoyl-CoA hydratase, mitochondrial	ECHM_MOUSE_Cys111	R.TFQDCYSSK.F	19.1146	19.0479	19.0092	19.1504	19.0506	19.3031	19.0573	0.0435427	19.168	0.103804	0.110763	0.236449
ECM29_MOUSE	Proteasome-associated protein ECM29 homolog	ECM29_MOUSE_Cys809	R.SATETIGSFLDSTSPLLAIAACTALGEIGR.N	15.6993	15.1456	15.7239	15.7249	16.0727	16.0368	15.5229	0.267019	15.9448	0.15617	0.421899	0.125985
EDC4_MOUSE	Enhancer of mRNA-decapping protein 4	EDC4_MOUSE_Cys510	K.LFCVHTK.A	17.5657	17.5066	17.2551	17.8615	17.828	17.6701	17.4424	0.134675	17.7865	0.0834599	0.344053	0.0372568
EF1A1_MOUSE	Elongation factor 1-alpha 1	EF1A1_MOUSE_Cys234	K.DGSASGTTLLEALDCILPPTRPTDK.P	20.2597	20.2672	20.3475	20.6673	20.439	20.7352	20.2915	0.0397345	20.6138	0.126665	0.322365	0.026434
EF1A1_MOUSE	Elongation factor 1-alpha 1	EF1A1_MOUSE_Cys411	K.SGDAAIVDM*VPGKPMCVESFSDYPPLGR.F	19.5362	19.2594	19.179	19.4319	19.3675	19.3653	19.3249	0.153023	19.3882	0.0308779	0.0633444	0.596793
EF1B_MOUSE	Elongation factor 1-beta	EF1B_MOUSE_Cys161	K.SSILLDVKPWDDETDMTKLEECVR.S	18.9423	18.4009	19.016	18.4111	18.7134	16.0691	18.7864	0.274234	17.7312	1.18175	-1.0552	0.286062
EF1B_MOUSE	Elongation factor 1-beta	EF1B_MOUSE_Cys191	K.LQIQCVVEDDK.V	18.3439	18.2923	18.4868	18.1711	18.1626	18.2701	18.3743	0.082258	18.2013	0.0487862	-0.173021	0.0627375
EF1D_MOUSE	Elongation factor 1-delta	EF1D_MOUSE_Cys217	K.SSILLDVKPWDDETDMAQLETCVR.S	17.07	17.1037	17.3453	17.1732	17.0728	17.3993	17.173	0.122617	17.2151	0.136564	0.0420777	0.762012
EF1G_MOUSE	Elongation factor 1-gamma	EF1G_MOUSE_Cys194	R.WFLTCINQPQFR.A	19.66	19.4246	19.655	19.9311	19.9834	19.7777	19.5799	0.109824	19.8974	0.0872814	0.317545	0.032863
EF2_MOUSE	Elongation factor 2	EF2_MOUSE_Cys369	R.CELLYEGPPDDEAAMGIK.S	18.1251	18.448	18.1657	18.5779	18.5206	18.7001	18.2463	0.143587	18.5995	0.0748505	0.353269	0.0367397
EF2_MOUSE	Elongation factor 2	EF2_MOUSE_Cys41	K.STLTDSLVCK.A	22.3868	22.0854	22.1027	22.4703	22.5466	22.3538	22.1917	0.138169	22.4569	0.079272	0.265237	0.0781079
EF2_MOUSE	Elongation factor 2	EF2_MOUSE_Cys466	R.YVEPIEDVPCGNIVGLVGVDQFLVK.T	17.8707	17.6218	17.6945	18.1076	17.9891	17.8964	17.729	0.104525	17.9977	0.0864471	0.268743	0.0487148
EF2_MOUSE	Elongation factor 2	EF2_MOUSE_Cys567	K.DLEEDHACIPIKK.S	20.7453	20.1209	20.2398	20.9827	20.6458	20.4342	20.3687	0.270699	20.6876	0.225886	0.318896	0.270007
EF2_MOUSE	Elongation factor 2	EF2_MOUSE_Cys591	R.ETVSEESNVLCLSK.S	18.8784	18.8799	18.7927	18.9528	19.1477	18.926	18.8503	0.0407619	19.0088	0.0987976	0.158512	0.10395
EF2_MOUSE	Elongation factor 2	EF2_MOUSE_Cys651	K.IWCFGPDGTGPNILTDITK.G	19.9621	19.6349	19.7598	20.2138	20.0224	19.6308	19.7856	0.134817	19.9557	0.242619	0.170113	0.434977
EF2_MOUSE	Elongation factor 2	EF2_MOUSE_Cys728	R.CLYASVLTAQPR.L	22.1972	22.1012	22.0179	22.3953	22.3058	22.3206	22.1054	0.0732681	22.3406	0.0391722	0.23512	0.016101
EF2_MOUSE	Elongation factor 2	EF2_MOUSE_Cys751	R.LMEPIYLVEIQCPEQVVGGIYGVLNR.K	16.7109	15.7727	16.7767	16.9438	16.7998	16.674	16.4201	0.458575	16.8059	0.110225	0.385773	0.311752
EHD4_MOUSE	EH domain-containing protein 4	EHD4_MOUSE_Cys141	R.FMCSQLPNQVLK.S	19.5144	19.5157	19.3614	19.6	19.732	19.7033	19.4638	0.0724569	19.6784	0.0566923	0.214571	0.0299796
EI2BA_MOUSE	Translation initiation factor eIF-2B subunit alpha	EI2BA_MOUSE_Cys218	K.IGTNQMAVCAK.A	19.9607	19.9311	19.9434	20.1733	20.2283	19.9846	19.9451	0.0121379	20.1288	0.104352	0.183697	0.0687356
EI2BD_MOUSE	Translation initiation factor eIF-2B subunit delta	EI2BD_MOUSE_Cys130	R.KGEQGGVPPQACPSTAGETTSGVK.R	12.704	12.1669	12.3545	12.7474	12.3348	12.0899	12.4085	0.222546	12.3907	0.271318	-0.0177424	0.946429
EI3JA_MOUSE	Eukaryotic translation initiation factor 3 subunit J-A	EI3JA_MOUSE_Cys210	K.ITNSLTVLCSEK.Q	19.7363	19.6691	19.7642	19.6642	19.913	20.0097	19.7232	0.0398932	19.8623	0.145554	0.139113	0.262348
EIF3A_MOUSE	Eukaryotic translation initiation factor 3 subunit A	EIF3A_MOUSE_Cys185	K.FCLQYTR.K	20.3095	20.2822	20.1104	20.6988	20.6118	20.5465	20.234	0.0881141	20.619	0.0624018	0.38497	0.00727032
EIF3A_MOUSE	Eukaryotic translation initiation factor 3 subunit A	EIF3A_MOUSE_Cys78	K.NICQQVNIK.S	19.5306	19.666	19.6095	19.9911	19.8653	19.8745	19.602	0.0555049	19.9103	0.0572253	0.308296	0.00543789
EIF3B_MOUSE	Eukaryotic translation initiation factor 3 subunit B	EIF3B_MOUSE_Cys504	R.NLFNVVDCK.L	15.9601	16.1162	15.9958	15.9941	16.2203	16.1229	16.0241	0.0667625	16.1125	0.0926213	0.088402	0.335033
EIF3B_MOUSE	Eukaryotic translation initiation factor 3 subunit B	EIF3B_MOUSE_Cys516	K.NGDYLCVK.V	20.3021	20.3597	20.2631	20.8851	20.686	20.5832	20.3083	0.0396508	20.7181	0.12532	0.40977	0.0116116
EIF3D_MOUSE	Eukaryotic translation initiation factor 3 subunit D	EIF3D_MOUSE_Cys258	K.TQGNVFATDAILATLMSCTR.S	16.8797	16.7381	16.6209	17.0915	17.255	17.3223	16.7462	0.10583	17.2229	0.0969253	0.476671	0.00932633
EIF3D_MOUSE	Eukaryotic translation initiation factor 3 subunit D	EIF3D_MOUSE_Cys327	R.NLAMEATYINHNFSQQCLR.M	17.7455	17.8682	17.5447	17.9973	18.2611	18.1414	17.7195	0.133333	18.1333	0.10788	0.413787	0.0269789
EIF3I_MOUSE	Eukaryotic translation initiation factor 3 subunit I	EIF3I_MOUSE_Cys76	K.HVLTGSADNSCR.L	14.6905	14.5038	14.4535	14.5564	14.6999	14.6649	14.5493	0.101938	14.6404	0.0610808	0.0911329	0.339128
ELMO1_MOUSE	Engulfment and cell motility protein 1	ELMO1_MOUSE_Cys411	R.EDKHECPFGR.S	16.2858	16.1085	16.2813	16.408	16.4364	16.2931	16.2252	0.0825531	16.3791	0.0619521	0.15396	0.102545
ELOB_MOUSE	Transcription elongation factor B polypeptide 2	ELOB_MOUSE_Cys60	K.TLGECGFTSQTARPQAPATVGLAFR.A	18.9789	19.0348	19.0432	18.9541	19.084	19.1482	19.019	0.028539	19.0621	0.0807156	0.0431358	0.515483
ELOC_MOUSE	Transcription elongation factor B polypeptide 1	ELOC_MOUSE_Cys11	K.TYGGCEGPDAMYVK.L	17.7084	17.717	17.9852	17.717	17.6414	17.8109	17.8036	0.128515	17.7231	0.0693237	-0.0804749	0.479281
EMAL4_MOUSE	Echinoderm microtubule-associated protein-like 4	EMAL4_MOUSE_Cys325	R.CLAVHPDK.I	15.8116	15.5819	15.3276	15.9549	16.0197	15.7143	15.5737	0.19768	15.8963	0.131385	0.322597	0.126968
ENOA_MOUSE	Alpha-enolase	ENOA_MOUSE_Cys119	K.FGANAILGVSLAVCK.A	20.0058	20.2771	20.1739	20.3528	20.3518	20.3537	20.1523	0.111829	20.3528	0.000767223	0.200482	0.0643023
ENOA_MOUSE	Alpha-enolase	ENOA_MOUSE_Cys337	K.SCNC#LLLK.V	24.5315	24.2761	23.8802	24.2673	24.142	24.6055	24.2292	0.26795	24.3383	0.195748	0.109006	0.666404
ENOA_MOUSE	Alpha-enolase	ENOA_MOUSE_Cys339	K.SC#NCLLLK.V	21.8804	21.3699	21.2187	21.5062	21.5214	21.9182	21.4897	0.283072	21.6486	0.190725	0.15893	0.546199
ENOA_MOUSE	Alpha-enolase	ENOA_MOUSE_Cys389	R.SGETEDTFIADLVVGLCTGQIK.T	19.9074	19.961	19.6749	19.6778	20.0334	20.0968	19.8478	0.124191	19.936	0.184408	0.0882392	0.60456
ENPL_MOUSE	Endoplasmin	ENPL_MOUSE_Cys576	K.KGYEVIYLTEPVDEYCIQALPEFDGKR.F	17.874	17.3583	17.8917	17.7155	18.1563	18.0193	17.708	0.247377	17.9637	0.184189	0.255696	0.30607
ENPL_MOUSE	Endoplasmin	ENPL_MOUSE_Cys645	R.LTESPCALVASQYGWSGNMER.I	16.0406	15.5729	15.7809	16.0067	15.9983	15.9037	15.7981	0.191308	15.9696	0.0466739	0.171442	0.285674
ENV1_MOUSE	MLV-related proviral Env polyprotein	ENV1_MOUSE_Cys162	Q.NQGPCYDSSAVSSDIK.G	17.455	17.2534	17.2573	16.9296	17.0816	17.0161	17.3219	0.094147	17.0091	0.0622455	-0.312828	0.0172502
ENV1_MOUSE	MLV-related proviral Env polyprotein	ENV1_MOUSE_Cys181	R.CNPLVLEFTDAGK.K	21.159	20.943	21.1126	20.6285	20.7859	20.7579	21.0715	0.0928046	20.7241	0.0685909	-0.347388	0.0130832
ENV1_MOUSE	MLV-related proviral Env polyprotein	ENV1_MOUSE_Cys356	K.LTLSEVTGQGLCVGAVPK.T	17.8667	17.7704	17.7663	17.1203	17.6522	17.2347	17.8011	0.0463758	17.3357	0.228571	-0.465401	0.0477294
ENV2_MOUSE	Retrovirus-related Env polyprotein from Fv-4 locus	ENV2_MOUSE_Cys564	K.EGGLCAALKEECCFYADHTGLVR.D	17.4689	17.0978	17.4536	17.3785	17.6279	17.3158	17.3401	0.171416	17.4407	0.13479	0.100609	0.549687
ENV2_MOUSE	Retrovirus-related Env polyprotein from Fv-4 locus	ENV2_MOUSE_Cys571	K.EGGLCAALKEECCFYADHTGLVR.D	17.4689	17.0978	17.4536	17.3785	17.6279	17.3158	17.3401	0.171416	17.4407	0.13479	0.100609	0.549687
ENV2_MOUSE	Retrovirus-related Env polyprotein from Fv-4 locus	ENV2_MOUSE_Cys572	K.EGGLCAALKEECCFYADHTGLVR.D	17.4689	17.0978	17.4536	17.3785	17.6279	17.3158	17.3401	0.171416	17.4407	0.13479	0.100609	0.549687
EPS15_MOUSE	Epidermal growth factor receptor substrate 15	EPS15_MOUSE_Cys784	K.VGTPTRPCPPPPGK.R	18.484	18.3762	18.3561	18.2139	18.3268	18.3801	18.4054	0.0562	18.3069	0.0692911	-0.0985191	0.193395
ERD23_MOUSE	ER lumen protein retaining receptor 3	ERD23_MOUSE_Cys29	K.SCAGISGK.S	20.385	20.4272	20.011	20.5268	20.6473	20.5672	20.2744	0.187068	20.5804	0.0500806	0.306044	0.0891189
ERF3A_MOUSE	Eukaryotic peptide chain release factor GTP-binding subunit ERF3A	ERF3A_MOUSE_Cys518	K.GIEEEEILPGFILCDLNNLCHSGR.T	19.3577	19.0009	19.1912	19.0471	19.4765	19.7012	19.1833	0.145738	19.4083	0.271373	0.22497	0.360019
ERF3A_MOUSE	Eukaryotic peptide chain release factor GTP-binding subunit ERF3A	ERF3A_MOUSE_Cys524	K.GIEEEEILPGFILCDLNNLCHSGR.T	18.585	18.3843	18.6415	18.0254	18.7507	18.8999	18.5369	0.110389	18.5586	0.381958	0.0217185	0.942133
ERF3A_MOUSE	Eukaryotic peptide chain release factor GTP-binding subunit ERF3A	ERF3A_MOUSE_Cys590	K.QDQVCIAR.L	17.5954	17.5783	17.588	17.9582	17.8238	17.7967	17.5873	0.00701397	17.8596	0.0706336	0.272316	0.00559622
ERF3A_MOUSE	Eukaryotic peptide chain release factor GTP-binding subunit ERF3A	ERF3A_MOUSE_Cys601	R.TAGTICLETFKDFPQMGR.F	19.1175	19.1482	18.9545	19.2338	19.2891	19.0192	19.0734	0.0849996	19.1807	0.116424	0.107272	0.351984
ERF3B_MOUSE	Eukaryotic peptide chain release factor GTP-binding subunit ERF3B	ERF3B_MOUSE_Cys394	K.KDIHFMPCSGLTGANIK.E	17.476	17.2146	17.2899	17.5191	17.4679	17.6054	17.3268	0.109903	17.5308	0.0567146	0.203989	0.0800222
ERLN1_MOUSE	Erlin-1	ERLN1_MOUSE_Cys310	K.IYFGSNIPSMFVDSSCALK.Y	16.5833	16.5128	16.4801	16.5549	16.998	16.4746	16.5254	0.0430906	16.6758	0.230126	0.150427	0.414937
ERO1A_MOUSE	ERO1-like protein alpha	ERO1A_MOUSE_Cys104	R.DCAVKPCHSDEVPDGIK.S	16.5905	16.6598	16.8104	16.4418	16.5625	16.2965	16.6869	0.0917646	16.4336	0.108757	-0.253319	0.0655258
ERO1A_MOUSE	ERO1-like protein alpha	ERO1A_MOUSE_Cys237	K.ENTFYNWLEGLCVEKR.A	16.6866	16.8526	17.3806	16.7948	17.2155	17.0887	16.9732	0.295877	17.033	0.176207	0.0597606	0.818212
ERO1A_MOUSE	ERO1-like protein alpha	ERO1A_MOUSE_Cys387	R.IMDCVGCFKCR.L	21.3526	21.5035	21.7125	21.6616	21.5872	21.4215	21.5229	0.147578	21.5567	0.100347	0.0338965	0.801513
ERO1A_MOUSE	ERO1-like protein alpha	ERO1A_MOUSE_Cys390	R.IMDCVGCFKCR.L	21.3526	21.5035	21.7125	21.6616	21.5872	21.4215	21.5229	0.147578	21.5567	0.100347	0.0338965	0.801513
ERO1A_MOUSE	ERO1-like protein alpha	ERO1A_MOUSE_Cys393	R.IMDCVGCFKCR.L	18.5321	18.4739	18.7298	18.5302	18.5334	18.3941	18.5786	0.109495	18.4859	0.0649277	-0.0926892	0.361326
ERO1A_MOUSE	ERO1-like protein alpha	ERO1A_MOUSE_Cys99	R.DCAVKPCHSDEVPDGIK.S	16.5905	16.6598	16.8104	16.4418	16.5625	16.2965	16.6869	0.0917646	16.4336	0.108757	-0.253319	0.0655258
ERO1B_MOUSE	ERO1-like protein beta	ERO1B_MOUSE_Cys130	K.ELDDCEQANK.L	16.7273	16.7181	16.7729	16.4086	16.3193	16.4381	16.7394	0.0239535	16.3887	0.0505003	-0.350725	0.00089076
ERP29_MOUSE	Endoplasmic reticulum resident protein 29	ERP29_MOUSE_Cys159	K.GQGVYLGM*PGCLPAYDALAGEFIK.A	19.6635	19.6474	19.8008	19.9647	20.056	20.2222	19.7039	0.0688155	20.081	0.106576	0.377104	0.0136538
ESTD_MOUSE	S-formylglutathione hydrolase	ESTD_MOUSE_Cys11	R.CFGGLQK.V	22.6876	22.6443	22.4937	22.9626	22.8926	23.0391	22.6085	0.0830814	22.9648	0.0598245	0.35624	0.00792416
ESTD_MOUSE	S-formylglutathione hydrolase	ESTD_MOUSE_Cys176	R.SVSAFAPICNPVLC#SWGK.K	16.9942	16.8537	16.9128	17.3282	17.2119	17.17	16.9202	0.0575755	17.2367	0.0669292	0.316465	0.00713395
ESTD_MOUSE	S-formylglutathione hydrolase	ESTD_MOUSE_Cys206	K.AYDATCLVK.A	23.3223	23.1449	23.0992	23.3356	23.3512	23.3851	23.1888	0.0962118	23.3573	0.0206548	0.168516	0.0726193
ESYT1_MOUSE	Extended synaptotagmin-1	ESYT1_MOUSE_Cys360	R.VGTQTFCSR.V	20.7585	20.8127	20.7833	20.8809	20.9888	20.9872	20.7849	0.0221522	20.9523	0.0504835	0.167419	0.0126987
ETFA_MOUSE	Electron transfer flavoprotein subunit alpha, mitochondrial	ETFA_MOUSE_Cys53	R.LGGEVSCLVAGTK.C	19.2932	19.1809	19.1599	19.2276	19.2167	19.3837	19.2113	0.0585281	19.276	0.076298	0.0646703	0.395416
ETFA_MOUSE	Electron transfer flavoprotein subunit alpha, mitochondrial	ETFA_MOUSE_Cys68	K.VVQDLCK.V	20.5346	20.5454	20.4174	20.6383	20.7453	20.7683	20.4991	0.0580009	20.7173	0.0566539	0.218159	0.0190178
ETFD_MOUSE	Electron transfer flavoprotein-ubiquinone oxidoreductase, mitochondrial	ETFD_MOUSE_Cys247	K.VTVFAEGCHGHLAK.Q	15.9958	15.6585	15.75	15.968	15.7872	15.8805	15.8014	0.142457	15.8786	0.0738132	0.0771306	0.533906
ETFD_MOUSE	Electron transfer flavoprotein-ubiquinone oxidoreductase, mitochondrial	ETFD_MOUSE_Cys265	R.ASCDAQTYGIGLK.E	18.2102	18.1946	18.235	18.0985	18.1799	18.1362	18.2133	0.0166251	18.1382	0.0332645	-0.0750794	0.0461523
ETFD_MOUSE	Electron transfer flavoprotein-ubiquinone oxidoreductase, mitochondrial	ETFD_MOUSE_Cys560	R.FCPAGVYEFVPLEQGDGFR.L	18.4906	18.4722	18.6372	18.6496	18.5996	18.5297	18.5333	0.0738283	18.5929	0.0491785	0.0596257	0.39565
ETHE1_MOUSE	Persulfide dioxygenase ETHE1, mitochondrial	ETHE1_MOUSE_Cys170	R.TDFQQGCAK.T	17.0975	17.1282	17.0181	17.2644	17.1388	17.383	17.0813	0.0464017	17.2621	0.0997152	0.180797	0.0807129
EWS_MOUSE	RNA-binding protein EWS	EWS_MOUSE_Cys539	R.TECNQCK.A	19.4619	19.3309	19.4836	19.4794	19.5308	19.7629	19.4255	0.0674464	19.591	0.123318	0.165535	0.171138
EWS_MOUSE	RNA-binding protein EWS	EWS_MOUSE_Cys542	R.TECNQCK.A	17.7595	17.7201	17.981	17.8158	17.8528	18.0157	17.8202	0.114845	17.8948	0.0868181	0.0745516	0.504566
EZH1_MOUSE	Histone-lysine N-methyltransferase EZH1	EZH1_MOUSE_Cys696	R.FANHSVNPNCYAK.V	13.042	12.9701	13.8493	13.8682	13.8799	13.451	13.2872	0.398563	13.733	0.199502	0.445866	0.230061
F10A1_MOUSE	Hsc70-interacting protein	F10A1_MOUSE_Cys170	K.LQKPNAAIRDCDR.A	17.9176	17.6928	17.8731	17.0952	17.5044	17.6652	17.8279	0.0971793	17.4216	0.239988	-0.40624	0.0907233
F10A1_MOUSE	Hsc70-interacting protein	F10A1_MOUSE_Cys208	R.LLGHWEEAAHDLALACK.L	14.6539	14.9238	14.6294	14.6388	14.847	14.7834	14.7357	0.133381	14.7564	0.0870942	0.0206888	0.863206
F120A_MOUSE	Constitutive coactivator of PPAR-gamma-like protein 1	F120A_MOUSE_Cys692	R.AFLACMR.S	18.1469	18.0956	18.0864	18.3695	18.3579	18.2417	18.1096	0.0266314	18.323	0.0577458	0.213421	0.00899525
F134A_MOUSE	Protein FAM134A	F134A_MOUSE_Cys417	K.CPPGAPVK.T	17.2579	17.1688	17.1699	17.2953	17.3291	17.3732	17.1989	0.0417225	17.3325	0.0318721	0.133662	0.0227526
F91A1_MOUSE	Protein FAM91A1	F91A1_MOUSE_Cys750	K.IATHGLCR.K	13.9057	14.2548	14.1014	14.3795	14.2703	14.527	14.0873	0.142859	14.3923	0.105187	0.304955	0.0719043
FA98A_MOUSE	Protein FAM98A	FA98A_MOUSE_Cys292	K.TACAINK.V	19.8959	20.0251	19.9002	20.3067	20.2994	20.3532	19.9404	0.0599113	20.3198	0.0238295	0.379386	0.00113939
FA98B_MOUSE	Protein FAM98B	FA98B_MOUSE_Cys183	K.VKDILCR.V	18.6903	18.4089	18.49	18.8064	18.7647	18.801	18.5297	0.118272	18.7907	0.0185305	0.261001	0.036815
FABP5_MOUSE	Fatty acid-binding protein, epidermal	FABP5_MOUSE_Cys47	M.AKPDC#IITCDGNNITVK.T	16.5279	16.6832	16.4978	16.75	16.797	17.0963	16.5696	0.0812451	16.8811	0.15335	0.311488	0.0640938
FABP5_MOUSE	Fatty acid-binding protein, epidermal	FABP5_MOUSE_Cys67	K.TTVFSCNLGEK.F	19.8805	19.9437	19.9175	19.9934	19.9273	20.1835	19.9139	0.0259279	20.0347	0.10861	0.120823	0.200701
FABP5_MOUSE	Fatty acid-binding protein, epidermal	FABP5_MOUSE_Cys87	K.TETVCTFQDGALVQHQQWDGK.E	14.0301	14.3266	13.8712	14.3905	13.8842	14.2587	14.076	0.188751	14.1778	0.214469	0.101823	0.640739
FAS_MOUSE	Fatty acid synthase	FAS_MOUSE_Cys1010	R.GYDYGPQFQGICEATLEGEQGK.L	15.998	16.0828	15.9182	16.0562	16.3988	16.4154	15.9997	0.06718	16.2901	0.165576	0.290454	0.0830475
FAS_MOUSE	Fatty acid synthase	FAS_MOUSE_Cys1874	K.TFCPAHK.S	14.8309	14.8503	14.4349	14.6463	15.0137	14.9822	14.7054	0.19143	14.8808	0.166259	0.175399	0.383314
FKB11_MOUSE	Peptidyl-prolyl cis-trans isomerase FKBP11	FKB11_MOUSE_Cys104	K.QVIPGLEQSLLDMCVGEK.R	19.472	19.3511	19.4983	19.5877	19.7603	19.5848	19.4405	0.0641107	19.6443	0.082052	0.203794	0.0504435
FKBP2_MOUSE	Peptidyl-prolyl cis-trans isomerase FKBP2	FKBP2_MOUSE_Cys40	K.KRVDHCPIK.S	15.7164	15.6704	15.3966	15.7271	15.7038	15.9605	15.5945	0.14117	15.7972	0.115923	0.202667	0.191716
FKBP4_MOUSE	Peptidyl-prolyl cis-trans isomerase FKBP4	FKBP4_MOUSE_Cys328	R.LASHLNLAMCHLK.L	13.7576	13.3257	13.7441	13.6507	14.312	14.0384	13.6091	0.200491	14.0004	0.271306	0.391249	0.176312
FKBP4_MOUSE	Peptidyl-prolyl cis-trans isomerase FKBP4	FKBP4_MOUSE_Cys342	K.LQAFSAAIESCNK.A	19.6003	19.5013	19.6541	19.4874	19.5209	19.5213	19.5852	0.0632645	19.5099	0.0158903	-0.0753323	0.177755
FKBP4_MOUSE	Peptidyl-prolyl cis-trans isomerase FKBP4	FKBP4_MOUSE_Cys396	K.TQLAVCQQR.T	17.766	17.7962	17.5656	17.8964	17.6854	17.7928	17.7093	0.10232	17.7916	0.0861417	0.0822773	0.43342
FLNA_MOUSE	Filamin-A	FLNA_MOUSE_Cys1018	K.IVSPSGAAVPCK.V	20.7889	20.7264	20.7289	20.9213	20.773	20.9701	20.748	0.0288749	20.8882	0.0837912	0.140112	0.0890398
FLNA_MOUSE	Filamin-A	FLNA_MOUSE_Cys1157	K.AHVAPCFDASK.V	20.0733	20.0859	19.9265	20.149	19.967	20.1417	20.0286	0.0723534	20.0859	0.0841369	0.0573685	0.50523
FLNA_MOUSE	Filamin-A	FLNA_MOUSE_Cys1165	K.CSGPGLER.A	16.8239	16.8595	16.9121	17.1792	17.0158	17.2139	16.8652	0.0362494	17.1363	0.0863752	0.27114	0.0149324
FLNA_MOUSE	Filamin-A	FLNA_MOUSE_Cys1260	K.LQVEPAVDTSGVQCYGPGIEGQGVFR.E	18.3374	18.2057	17.8908	17.9908	18.1959	18.2961	18.1447	0.187375	18.1609	0.127095	0.0162896	0.923853
FLNA_MOUSE	Filamin-A	FLNA_MOUSE_Cys1402	K.MSCMDNK.D	20.7092	20.7071	20.7828	20.6618	20.7208	20.7867	20.7331	0.035219	20.7231	0.0510347	-0.00995067	0.831592
FLNA_MOUSE	Filamin-A	FLNA_MOUSE_Cys2476	K.MDCQEC#PEGYR.V	16.976	16.9131	16.945	16.8908	16.9261	17.0419	16.9447	0.025691	16.9529	0.0645307	0.00824958	0.874757
FLNA_MOUSE	Filamin-A	FLNA_MOUSE_Cys2479	K.MDC#QECPEGYR.V	17.0455	17.1701	17.0888	17.1094	17.0852	17.2983	17.1015	0.0516237	17.1643	0.0952938	0.0628125	0.458454
FLNA_MOUSE	Filamin-A	FLNA_MOUSE_Cys478	R.SPYTVTVGQACNPAACR.A	17.741	17.7455	17.907	17.7464	17.9507	17.9087	17.7978	0.0771981	17.8686	0.0880944	0.070795	0.440864
FLNA_MOUSE	Filamin-A	FLNA_MOUSE_Cys483	R.SPYTVTVGQAC#NPAACR.A	20.9244	20.7857	20.7019	20.9806	21.0106	21.1246	20.804	0.091749	21.0386	0.0620265	0.234611	0.0401042
FLNA_MOUSE	Filamin-A	FLNA_MOUSE_Cys574	K.VGTECGNQK.V	18.3336	18.2964	18.3298	18.3472	18.3539	18.4513	18.3199	0.0167083	18.3842	0.0475622	0.0642496	0.145828
FLNA_MOUSE	Filamin-A	FLNA_MOUSE_Cys733	K.DNGNGTYSCSYVPR.K	15.5288	15.6673	15.4731	15.483	15.4713	15.7604	15.5564	0.0816313	15.5715	0.133622	0.015137	0.897863
FLNA_MOUSE	Filamin-A	FLNA_MOUSE_Cys810	K.CAPGVVGPTEADIDFDIIR.N	18.0732	18.4043	18.4835	18.4139	18.8218	18.3452	18.3203	0.177706	18.527	0.210371	0.206636	0.348436
FLNB_MOUSE	Filamin-B	FLNB_MOUSE_Cys1326	K.VAVTEGCQPSR.V	15.7119	15.6482	15.5549	15.7069	15.7718	15.8371	15.6383	0.0644888	15.7719	0.0531486	0.133588	0.0866125
FLNB_MOUSE	Filamin-B	FLNB_MOUSE_Cys1438	R.ACIPQSFTVDSSK.A	18.4466	18.234	18.469	18.6241	18.7267	18.7367	18.3832	0.105889	18.6959	0.0508798	0.312643	0.0197131
FLNB_MOUSE	Filamin-B	FLNB_MOUSE_Cys1617	K.CLATGPGIAPTVK.T	17.9859	17.9196	17.9084	18.1774	17.9507	18.1541	17.938	0.0342334	18.0941	0.101802	0.156107	0.109007
FLNB_MOUSE	Filamin-B	FLNB_MOUSE_Cys2115	R.APAVATVGSICDLNLK.I	18.2353	18.2659	18.2681	18.2528	18.5327	18.651	18.2564	0.0149634	18.4788	0.166967	0.222444	0.133808
FLNB_MOUSE	Filamin-B	FLNB_MOUSE_Cys2501	R.SSTETCYSAIPK.S	17.0618	16.9969	16.946	17.1811	17.2403	17.3981	17.0016	0.0473736	17.2732	0.0916252	0.271608	0.0204051
FLNB_MOUSE	Filamin-B	FLNB_MOUSE_Cys2556	K.AGSNMLLIGVHGPTTPCEEVSMK.H	16.8236	16.9105	16.7099	16.7689	16.9083	17.0715	16.8147	0.0821516	16.9162	0.123672	0.101586	0.388026
FLNB_MOUSE	Filamin-B	FLNB_MOUSE_Cys706	R.MDGTYACSYTPLK.A	18.3008	18.3707	18.4285	18.5299	18.5415	18.6183	18.3667	0.0521788	18.5632	0.0391998	0.196586	0.0130544
FLNB_MOUSE	Filamin-B	FLNB_MOUSE_Cys991	K.VVPCLVAPVAGR.E	18.9401	18.8768	18.9666	19.0202	19.1441	19.2991	18.9278	0.0376793	19.1544	0.114107	0.226612	0.0559847
FLT3_MOUSE	Receptor-type tyrosine-protein kinase FLT3	FLT3_MOUSE_Cys831	K.ICDFGLAR.D	19.007	19.0008	18.9659	18.9823	18.9209	18.9178	18.9912	0.0180736	18.9403	0.0296847	-0.0508928	0.107116
FPPS_MOUSE	Farnesyl pyrophosphate synthase	FPPS_MOUSE_Cys332	K.SLIEQCSAPLPPSIFMELANK.I	18.8689	18.8238	18.8831	19.0566	19.1291	18.9802	18.8586	0.0252722	19.0553	0.0607935	0.196734	0.0134137
FRIH_MOUSE	Ferritin heavy chain	FRIH_MOUSE_Cys103	R.DDWESGLNAMECALHLEK.S	12.7027	15.2754	14.9947	15.1839	15.5147	15.516	14.3243	1.15235	15.4049	0.156282	1.08061	0.259095
FRIH_MOUSE	Ferritin heavy chain	FRIH_MOUSE_Cys131	K.NDPHLCDFIETYYLSEQVK.S	16.0139	15.7227	16.0532	16.5409	16.5008	16.5102	15.9299	0.147399	16.5173	0.0171371	0.587374	0.00499921
FRIL1_MOUSE	Ferritin light chain 1	FRIL1_MOUSE_Cys127	H.LCDFLESHYLDK.E	16.4887	16.4436	16.5868	17.0588	17.0658	16.942	16.5063	0.05978	17.0222	0.0568136	0.515858	0.000901669
FUBP1_MOUSE	Far upstream element-binding protein 1	FUBP1_MOUSE_Cys128	R.IQQESGCK.I	20.0441	19.9412	20.2652	20.1063	20.0334	20.5068	20.0835	0.135157	20.2155	0.208126	0.132019	0.493695
FUBP1_MOUSE	Far upstream element-binding protein 1	FUBP1_MOUSE_Cys144	R.SCMLTGTPESVQSAK.R	18.9755	19.0307	19.0767	19.0312	19.2681	19.4543	19.0276	0.0413818	19.2512	0.173159	0.223573	0.150393
FUBP2_MOUSE	Far upstream element-binding protein 2	FUBP2_MOUSE_Cys177	K.IQQDSGCKVQISPDSGGLPER.S	15.8014	15.9136	15.752	15.4688	15.5168	15.6839	15.8224	0.0676039	15.5565	0.0921669	-0.265874	0.0302284
FUS_MOUSE	RNA-binding protein FUS	FUS_MOUSE_Cys421	K.CPNPTC#ENMNFSWR.N	17.4605	17.5247	17.6126	17.704	17.5807	17.8234	17.5326	0.0623297	17.7027	0.0990765	0.170072	0.109094
FUS_MOUSE	RNA-binding protein FUS	FUS_MOUSE_Cys440	R.NEC#NQCK.A	18.3272	18.0771	18.2104	18.3528	18.3492	18.6799	18.2049	0.102191	18.4606	0.155088	0.25574	0.123338
G3BP1_MOUSE	Ras GTPase-activating protein-binding protein 1	G3BP1_MOUSE_Cys73	R.KVMSQNFTNCHTK.I	15.6408	15.4269	15.5789	15.5251	15.8587	15.6213	15.5489	0.0898687	15.6684	0.140183	0.119476	0.367635
G3P_MOUSE	Glyceraldehyde-3-phosphate dehydrogenase	G3P_MOUSE_Cys150	K.IVSNASCTTNCLAPLAK.V	23.6231	23.5116	23.5855	23.6383	23.8945	23.7089	23.5734	0.0463387	23.7472	0.108031	0.173821	0.104689
G3P_MOUSE	Glyceraldehyde-3-phosphate dehydrogenase	G3P_MOUSE_Cys154	K.IVSNASC#TTNCLAPLAK.V	23.7554	23.6602	23.6828	23.8226	23.9466	23.9069	23.6995	0.0406042	23.892	0.0517154	0.192555	0.0143579
G3PT_MOUSE	Glyceraldehyde-3-phosphate dehydrogenase, testis-specific	G3PT_MOUSE_Cys351	R.VPTPNVSVVDLTCR.L	22.0727	22.1368	22.1105	22.2571	22.1932	22.1407	22.1067	0.0262986	22.197	0.0476148	0.0903063	0.0786973
G6PD1_MOUSE	Glucose-6-phosphate 1-dehydrogenase X	G6PD1_MOUSE_Cys158	K.NIQETCMSQTGWNR.I	18.41	17.7148	18.3301	17.6853	17.7531	17.6935	18.1516	0.310617	17.7106	0.0302196	-0.441011	0.116322
G6PD1_MOUSE	Glucose-6-phosphate 1-dehydrogenase X	G6PD1_MOUSE_Cys232	R.DNIACVILTFKEPFGTEGR.G	15.7867	15.5107	15.5807	15.4325	15.7018	15.4231	15.626	0.117144	15.5191	0.129241	-0.106919	0.434925
G6PD1_MOUSE	Glucose-6-phosphate 1-dehydrogenase X	G6PD1_MOUSE_Cys385	R.DVAGDIFHQQCK.R	22.0135	21.966	21.8459	22.1962	22.1157	21.9309	21.9418	0.070505	22.0809	0.111054	0.139084	0.209165
G6PI_MOUSE	Glucose-6-phosphate isomerase	G6PI_MOUSE_Cys404	T.KMIPCDFLIPVQTQHPIR.K	15.2061	14.5991	15.3954	15.8096	15.9572	15.7914	15.0669	0.339685	15.8527	0.074249	0.78583	0.0330205
GALT7_MOUSE	N-acetylgalactosaminyltransferase 7	GALT7_MOUSE_Cys585	R.INEANQLMQYDQCLTK.G	17.8866	17.7422	17.9496	17.9341	18.095	17.8553	17.8595	0.0868199	17.9615	0.099762	0.102032	0.336555
GANAB_MOUSE	Neutral alpha-glucosidase AB	GANAB_MOUSE_Cys41	K.TCDESSFCK.R	18.1057	18.4088	18.2405	18.4674	18.5744	18.2433	18.2517	0.124003	18.4284	0.137971	0.176692	0.249229
GANAB_MOUSE	Neutral alpha-glucosidase AB	GANAB_MOUSE_Cys47	K.TCDESSFCK.R	18.1057	18.4088	18.2405	18.4674	18.5744	18.2433	18.2517	0.124003	18.4284	0.137971	0.176692	0.249229
GATM_MOUSE	Glycine amidinotransferase, mitochondrial	GATM_MOUSE_Cys252	K.FVTTEFEPCFDAADFIR.A	16.6552	16.6372	16.5831	16.753	16.788	16.9308	16.6252	0.0306531	16.8239	0.0769048	0.19877	0.0273926
GBB1_MOUSE	Guanine nucleotide-binding protein G(I)/G(S)/G(T) subunit beta-1	GBB1_MOUSE_Cys148	R.ELAGHTGYLSCCR.F	14.1632	14.1173	13.8996	14.3978	14.4542	14.3495	14.0601	0.114963	14.4005	0.0427922	0.340451	0.0171758
GBB1_MOUSE	Guanine nucleotide-binding protein G(I)/G(S)/G(T) subunit beta-1	GBB1_MOUSE_Cys149	R.ELAGHTGYLSCCR.F	14.1632	14.1173	13.8996	14.3978	14.4542	14.3495	14.0601	0.114963	14.4005	0.0427922	0.340451	0.0171758
GBB1_MOUSE	Guanine nucleotide-binding protein G(I)/G(S)/G(T) subunit beta-1	GBB1_MOUSE_Cys204	R.LFVSGACDASAK.L	14.8313	14.8237	15.1113	14.0685	14.6334	13.9651	14.9221	0.133843	14.2224	0.293723	-0.699741	0.0374455
GBB1_MOUSE	Guanine nucleotide-binding protein G(I)/G(S)/G(T) subunit beta-1	GBB1_MOUSE_Cys25	R.KACADATLSQITNNIDPVGR.I	16.7765	17.0422	16.8609	16.9783	17.0649	16.9161	16.8932	0.110869	16.9864	0.0610373	0.0932161	0.356404
GBLP_MOUSE	Guanine nucleotide-binding protein subunit beta-2-like 1	GBLP_MOUSE_Cys138	K.LWNTLGVCK.Y	16.2298	16.4755	16.1955	16.4804	16.6666	16.6377	16.3003	0.124717	16.5949	0.0818183	0.29462	0.0491435
GBLP_MOUSE	Guanine nucleotide-binding protein subunit beta-2-like 1	GBLP_MOUSE_Cys153	K.YTVQDESHSEWVSCVR.F	14.622	14.8912	14.9299	14.6139	15.244	13.9194	14.8144	0.13692	14.5924	0.540996	-0.221946	0.603833
GBLP_MOUSE	Guanine nucleotide-binding protein subunit beta-2-like 1	GBLP_MOUSE_Cys168	R.FSPNSSNPIIVSCGWDK.L	19.4557	19.4861	19.5358	19.8009	19.619	19.7931	19.4925	0.0330322	19.7376	0.0839881	0.245103	0.0184478
GBLP_MOUSE	Guanine nucleotide-binding protein subunit beta-2-like 1	GBLP_MOUSE_Cys182	K.VWNLANCK.L	20.9925	20.9996	21.2081	21.7246	21.6935	21.4179	21.0667	0.100021	21.612	0.137826	0.545273	0.0105916
GBLP_MOUSE	Guanine nucleotide-binding protein subunit beta-2-like 1	GBLP_MOUSE_Cys240	K.HLYTLDGGDIINALCFSPNR.Y	13.5167	13.8505	13.4893	14.7453	14.2242	14.1043	13.6188	0.164189	14.3579	0.278283	0.739096	0.031826
GBLP_MOUSE	Guanine nucleotide-binding protein subunit beta-2-like 1	GBLP_MOUSE_Cys249	R.YWLCAATGPSIK.I	20.455	20.5089	20.4682	20.8785	20.9648	20.7782	20.4774	0.0229544	20.8738	0.0762512	0.396462	0.00214469
GDIA_MOUSE	Rab GDP dissociation inhibitor alpha	GDIA_MOUSE_Cys317	K.NTNDANSCQIIIPQNQVNR.K	15.5085	15.3818	15.4762	15.5447	15.4087	15.3795	15.4555	0.0537407	15.4443	0.0719854	-0.0112191	0.86839
GDIB_MOUSE	Rab GDP dissociation inhibitor beta	GDIB_MOUSE_Cys282	K.QLICDPSYVK.D	20.7792	20.9131	20.8939	21.1018	20.9854	21.0625	20.8621	0.0591157	21.0499	0.0483283	0.187833	0.0253773
GDIB_MOUSE	Rab GDP dissociation inhibitor beta	GDIB_MOUSE_Cys302	R.VICILSHPIK.N	19.2356	19.1912	18.9433	19.2334	19.2955	18.9909	19.1234	0.128608	19.1733	0.131443	0.0499013	0.720684
GDIR1_MOUSE	Rho GDP-dissociation inhibitor 1	GDIR1_MOUSE_Cys79	R.LTLVCSTAPGPLELDLTGDLESFKK.Q	18.8282	18.6751	18.6613	18.8589	18.5313	18.691	18.7215	0.0756294	18.6937	0.133755	-0.0278043	0.810646
GDIR2_MOUSE	Rho GDP-dissociation inhibitor 2	GDIR2_MOUSE_Cys75	R.LSLVCDSAPGPITMDLTGDLEALKK.D	17.827	17.6628	17.9275	17.689	17.9435	17.5071	17.8058	0.109086	17.7132	0.178988	-0.0925318	0.566272
GELS_MOUSE	Gelsolin	GELS_MOUSE_Cys670	R.LFACSNR.I	19.9271	19.9318	19.9047	19.8088	19.7693	19.9683	19.9212	0.0118356	19.8488	0.0860503	-0.0723851	0.303904
GILT_MOUSE	Gamma-interferon-inducible lysosomal thiol reductase	GILT_MOUSE_Cys40	T.ASLSQASSEGTTTCK.A	17.7809	17.5813	17.8905	17.0081	17.2213	16.9744	17.7509	0.128003	17.0679	0.109313	-0.682991	0.00456945
GILT_MOUSE	Gamma-interferon-inducible lysosomal thiol reductase	GILT_MOUSE_Cys69	R.VSLYYESLCGACR.Y	23.3825	23.396	23.5655	22.6314	22.6711	22.8634	23.448	0.0832607	22.722	0.101285	-0.726053	0.00143557
GILT_MOUSE	Gamma-interferon-inducible lysosomal thiol reductase	GILT_MOUSE_Cys72	R.VSLYYESLCGACR.Y	23.3825	23.396	23.5655	22.6314	22.6711	22.8634	23.448	0.0832607	22.722	0.101285	-0.726053	0.00143557
GIT1_MOUSE	ARF GTPase-activating protein GIT1	GIT1_MOUSE_Cys149	R.TGNLETCLR.L	18.9933	18.9629	19.0456	19.2498	19.2102	19.2793	19.0006	0.0341758	19.2464	0.0283367	0.245829	0.00143587
GLOD4_MOUSE	Glyoxalase domain-containing protein 4	GLOD4_MOUSE_Cys45	K.AACNGPYDGK.W	17.6356	17.3045	17.3733	17.4056	17.3713	17.6208	17.4378	0.142646	17.4659	0.110424	0.0280996	0.836431
GLRX1_MOUSE	Glutaredoxin-1	GLRX1_MOUSE_Cys23	K.VVVFIKPTCPYCR.K	18.6035	17.9891	17.9347	18.1109	18.1584	18.2556	18.1758	0.303288	18.1749	0.0602169	-0.00083629	0.997131
GLRX1_MOUSE	Glutaredoxin-1	GLRX1_MOUSE_Cys26	K.VVVFIKPTCPYCR.K	18.6035	17.9891	17.9347	18.1109	18.1584	18.2556	18.1758	0.303288	18.1749	0.0602169	-0.00083629	0.997131
GLRX2_MOUSE	Glutaredoxin-2, mitochondrial	GLRX2_MOUSE_Cys146	K.LLPLVHQCYLK.K	15.1831	14.3254	14.9939	15.1004	15.6085	15.1562	14.8341	0.367928	15.2884	0.22751	0.454248	0.211713
GLSK_MOUSE	Glutaminase kidney isoform, mitochondrial	GLSK_MOUSE_Cys183	R.LKECMDMLR.L	18.5515	18.6244	18.6123	18.7141	18.7251	18.7848	18.5961	0.031924	18.7413	0.0310676	0.145277	0.00993944
GLU2B_MOUSE	Glucosidase 2 subunit beta	GLU2B_MOUSE_Cys464	K.YEQGTGCWQGPNR.S	16.6305	16.7012	16.7878	16.5047	16.7282	16.6251	16.7065	0.064323	16.6193	0.0913497	-0.0871745	0.331744
GLYC_MOUSE	Serine hydroxymethyltransferase, cytosolic	GLYC_MOUSE_Cys383	K.NTCPGDK.S	14.8459	14.9363	14.8088	15.046	14.9431	15.0503	14.8637	0.0535238	15.0131	0.0495527	0.149492	0.0441867
GLYC_MOUSE	Serine hydroxymethyltransferase, cytosolic	GLYC_MOUSE_Cys62	R.AVLEALGSCLNNK.Y	16.3599	16.1319	16.3267	16.3536	16.4242	16.5901	16.2728	0.100594	16.456	0.0991431	0.183172	0.14056
GNPTA_MOUSE	N-acetylglucosamine-1-phosphotransferase subunits alpha/beta	GNPTA_MOUSE_Cys1073	K.SLVTNCKPVTDK.I	19.7675	19.4002	19.6078	20.2345	20.2093	19.9355	19.5919	0.150367	20.1264	0.135398	0.534578	0.0201866
GPNMB_MOUSE	Transmembrane glycoprotein NMB	GPNMB_MOUSE_Cys535	K.AYKPIGNCPR.N	18.6246	18.5	18.6371	18.7653	18.9637	18.9398	18.5873	0.0618852	18.8896	0.0884242	0.302324	0.0166579
GPX41_MOUSE	Phospholipid hydroperoxide glutathione peroxidase, mitochondrial	GPX41_MOUSE_Cys134	K.ICVNGDDAHPLWK.W	17.5451	17.4368	17.5117	17.7152	17.7015	17.9002	17.4979	0.0452545	17.7723	0.0905998	0.274441	0.0185801
GRN_MOUSE	Granulins	GRN_MOUSE_Cys207	R.AVSLPFSVVCPDAK.T	20.0995	20.0684	20.2261	19.5362	19.6141	19.7393	20.1313	0.068227	19.6299	0.0836374	-0.501472	0.00277657
GRP75_MOUSE	Stress-70 protein, mitochondrial	GRP75_MOUSE_Cys317	K.CELSSSVQTDINLPYLTMDASGPK.H	17.24	17.1911	17.3623	17.6146	17.7327	17.6137	17.2645	0.0720027	17.6536	0.0558884	0.389154	0.00379376
GRP75_MOUSE	Stress-70 protein, mitochondrial	GRP75_MOUSE_Cys487	K.SQVFSTAADGQTQVEIKVCQGER.E	16.3054	16.2582	16.3602	16.1506	16.0904	16.1856	16.3079	0.0416909	16.1422	0.039335	-0.165747	0.0149814
GRP75_MOUSE	Stress-70 protein, mitochondrial	GRP75_MOUSE_Cys66	K.GAVVGIDLGTTNSCVAVMEGK.Q	18.0835	17.9865	18.0684	18.0432	18.2409	18.089	18.0461	0.042621	18.1244	0.0844756	0.0782434	0.30715
GSH1_MOUSE	Glutamate--cysteine ligase catalytic subunit	GSH1_MOUSE_Cys152	R.LGCPGFTLPEHRPNPEEGGASK.S	14.8776	14.7473	14.7275	15.4448	14.9275	15.7305	14.7841	0.0666046	15.3676	0.332354	0.58344	0.0716539
GSHR_MOUSE	Glutathione reductase, mitochondrial	GSHR_MOUSE_Cys80	K.LGGTCVNVGCVPK.K	19.5597	19.5098	19.5301	19.6522	19.8157	19.6826	19.5332	0.0204819	19.7168	0.07099	0.183632	0.0245648
GSHR_MOUSE	Glutathione reductase, mitochondrial	GSHR_MOUSE_Cys85	K.LGGTCVNVGCVPK.K	19.5597	19.5098	19.5301	19.6522	19.8157	19.6826	19.5332	0.0204819	19.7168	0.07099	0.183632	0.0245648
GSK3B_MOUSE	Glycogen synthase kinase-3 beta	GSK3B_MOUSE_Cys335	R.LTPLEACAHSFFDELRDPNVK.L	13.9049	13.4716	13.6119	13.6148	13.5907	13.8314	13.6628	0.180535	13.679	0.108248	0.0161572	0.918787
GSLG1_MOUSE	Golgi apparatus protein 1	GSLG1_MOUSE_Cys1067	K.ADIFVDPVLHTACALDIK.H	18.0508	17.6931	17.7445	18.0695	18.2322	17.897	17.8294	0.157936	18.0662	0.136882	0.236758	0.184405
GSLG1_MOUSE	Golgi apparatus protein 1	GSLG1_MOUSE_Cys312	R.HLYFACR.D	13.322	13.2443	13.0363	13.648	13.564	13.1819	13.2009	0.120607	13.4647	0.202845	0.263776	0.189098
GSTO1_MOUSE	Glutathione S-transferase omega-1	GSTO1_MOUSE_Cys191	K.ECLAHTPK.L	18.345	18.2335	18.0497	18.4499	18.3976	18.5324	18.2094	0.121767	18.46	0.0554642	0.25058	0.057074
GSTO1_MOUSE	Glutathione S-transferase omega-1	GSTO1_MOUSE_Cys32	R.FCPFAQR.T	20.774	20.3662	20.5689	20.4013	20.4511	20.6693	20.5697	0.166455	20.5072	0.116418	-0.0624638	0.686079
GUAA_MOUSE	GMP synthase [glutamine-hydrolyzing]	GUAA_MOUSE_Cys530	R.SYSYVCGISSK.D	19.1357	19.013	18.9489	19.1213	19.1118	19.1294	19.0325	0.0775065	19.1208	0.00718064	0.0883077	0.183888
HA11_MOUSE	H-2 class I histocompatibility antigen, D-B alpha chain	HA11_MOUSE_Cys188	K.AYLEGECVEWLHR.Y	17.8234	17.8744	17.5551	17.6225	17.9999	17.924	17.751	0.140069	17.8488	0.162997	0.0978033	0.554886
HA12_MOUSE	H-2 class I histocompatibility antigen, D-D alpha chain	HA12_MOUSE_Cys283	K.YTCHVEHEGLPEPLTLR.W	16.0551	16.3043	15.7295	15.9485	16.2985	16.14	16.0296	0.235346	16.129	0.143099	0.0993929	0.636694
HBS1L_MOUSE	HBS1-like protein	HBS1L_MOUSE_Cys133	R.AVCAGQPSK.G	16.4892	16.5042	16.4864	16.5603	16.6185	16.5903	16.4933	0.00779327	16.5897	0.0237313	0.0964334	0.00547074
HEAT3_MOUSE	HEAT repeat-containing protein 3	HEAT3_MOUSE_Cys185	K.EGCLEIVLQYLRR.F	13.1845	12.6805	13.1831	13.5087	13.7437	13.6211	13.016	0.237233	13.6245	0.095943	0.608472	0.0282346
HECD1_MOUSE	E3 ubiquitin-protein ligase HECTD1	HECD1_MOUSE_Cys1373	K.NNCPDKTSAAAGSSSR.K	11.814	11.6789	11.1152	11.9365	11.6537	11.7404	11.536	0.302647	11.7769	0.118302	0.240892	0.353623
HECD1_MOUSE	E3 ubiquitin-protein ligase HECTD1	HECD1_MOUSE_Cys254	R.MAAAGGTVSGPSSACKPGR.S	14.9862	15.0568	14.8424	15.4536	15.2863	15.183	14.9618	0.0892149	15.3076	0.111499	0.345816	0.0266622
HERC4_MOUSE	Probable E3 ubiquitin-protein ligase HERC4	HERC4_MOUSE_Cys1025	K.LVIQSTGGGESYLPVSHTCFNLLDLPK.Y	14.7031	13.8067	14.404	14.8294	14.7023	14.458	14.3046	0.37262	14.6632	0.154135	0.35863	0.2769
HEXB_MOUSE	Beta-hexosaminidase subunit beta	HEXB_MOUSE_Cys288	K.NLLTPCYNQK.T	20.2717	20.1765	20.2706	20.1516	20.3929	20.1701	20.2396	0.0446212	20.2382	0.109648	-0.00140642	0.9874
HEXB_MOUSE	Beta-hexosaminidase subunit beta	HEXB_MOUSE_Cys530	R.GIAAQPLYTGYCNYENKI.-	17.5059	17.4148	17.7565	17.9822	17.9242	17.6813	17.5591	0.144452	17.8626	0.130341	0.303504	0.0920293
HGS_MOUSE	Hepatocyte growth factor-regulated tyrosine kinase substrate	HGS_MOUSE_Cys185	R.ACGQIFCGK.C	19.9738	19.8696	19.8709	19.9341	20.1017	20.2233	19.9047	0.0487939	20.0864	0.118572	0.181632	0.115675
HGS_MOUSE	Hepatocyte growth factor-regulated tyrosine kinase substrate	HGS_MOUSE_Cys190	R.ACGQIFCGK.C	19.9738	19.8696	19.8709	19.9341	20.1017	20.2233	19.9047	0.0487939	20.0864	0.118572	0.181632	0.115675
HMGB1_MOUSE	High mobility group protein B1	HMGB1_MOUSE_Cys106	K.RPPSAFFLFCSEYRPK.I	16.672	16.9085	17.239	16.8025	16.6902	17.1855	16.9398	0.232546	16.8927	0.212045	-0.0470875	0.842764
HMGB1_MOUSE	High mobility group protein B1	HMGB1_MOUSE_Cys23	K.MSSYAFFVQTCR.E	22.2675	22.1504	22.6422	22.1061	22.0871	22.2797	22.3534	0.209764	22.1576	0.0866599	-0.195733	0.289598
HMGB2_MOUSE	High mobility group protein B2	HMGB2_MOUSE_Cys106	K.RPPSAFFLFCSENRPK.I	14.143	14.3637	14.2329	13.1014	14.2095	13.8777	14.2465	0.090616	13.7295	0.464384	-0.516954	0.197196
HNRL2_MOUSE	Heterogeneous nuclear ribonucleoprotein U-like protein 2	HNRL2_MOUSE_Cys403	R.ALLPHVLCK.N	12.7782	12.6217	12.4635	13.4238	13.4784	13.5367	12.6211	0.128468	13.4796	0.0461112	0.858469	0.000882867
HNRPL_MOUSE	Heterogeneous nuclear ribonucleoprotein L	HNRPL_MOUSE_Cys258	K.ASLNGADIYSGC#CTLK.I	18.9177	18.9613	18.8108	19.2468	19.0367	19.2866	18.8966	0.0632282	19.19	0.109627	0.293431	0.0305283
HNRPL_MOUSE	Heterogeneous nuclear ribonucleoprotein L	HNRPL_MOUSE_Cys401	R.VFNVFCLYGNVEK.V	16.497	16.7365	16.3379	16.8947	16.9213	16.8061	16.5238	0.163827	16.8741	0.049239	0.350265	0.0443111
HNRPL_MOUSE	Heterogeneous nuclear ribonucleoprotein L	HNRPL_MOUSE_Cys449	K.MNVCVSK.Q	22.3561	22.5499	22.4713	22.9077	22.8657	22.9524	22.4591	0.079577	22.9086	0.0353715	0.449507	0.00187254
HNRPQ_MOUSE	Heterogeneous nuclear ribonucleoprotein Q	HNRPQ_MOUSE_Cys289	R.GFCFLEYEDHK.T	16.9293	16.7798	16.66	17.0682	16.9755	17.2771	16.7897	0.110138	17.1069	0.126126	0.317238	0.0552676
HNRPQ_MOUSE	Heterogeneous nuclear ribonucleoprotein Q	HNRPQ_MOUSE_Cys96	K.SAFLCGVMK.T	20.9311	20.8485	21.0194	21.123	21.1537	21.2401	20.933	0.0697621	21.1722	0.0496059	0.239233	0.0167846
HNRPU_MOUSE	Heterogeneous nuclear ribonucleoprotein U	HNRPU_MOUSE_Cys449	K.EKPYFPIPEDCTFIQNVPLEDR.V	17.3041	16.755	17.2314	17.5209	17.975	17.7841	17.0968	0.243541	17.76	0.186177	0.663167	0.0376812
HNRPU_MOUSE	Heterogeneous nuclear ribonucleoprotein U	HNRPU_MOUSE_Cys473	K.KDCEVVMMIGLPGAGK.T	19.08	19.0185	19.2086	19.1842	19.4215	19.324	19.1023	0.0791958	19.3099	0.0973806	0.20758	0.0794833
HNRPU_MOUSE	Heterogeneous nuclear ribonucleoprotein U	HNRPU_MOUSE_Cys538	R.APQCLGK.F	20.8587	20.6923	20.7364	21.2404	21.3152	21.2732	20.7624	0.0703793	21.2763	0.0306132	0.513865	0.000694006
HNRPU_MOUSE	Heterogeneous nuclear ribonucleoprotein U	HNRPU_MOUSE_Cys583	K.AVVVCPK.D	21.9219	21.929	22.1497	22.5092	22.4723	22.55	22.0002	0.105775	22.5105	0.0317259	0.510324	0.00283231
HPRT_MOUSE	Hypoxanthine-guanine phosphoribosyltransferase	HPRT_MOUSE_Cys106	K.SYCNDQSTGDIK.V	16.4508	16.1324	16.2554	16.3451	16.2953	16.4258	16.2795	0.131127	16.3554	0.0537609	0.0758355	0.491321
HPRT_MOUSE	Hypoxanthine-guanine phosphoribosyltransferase	HPRT_MOUSE_Cys206	R.DLNHVCVISETGK.A	20.1617	20.1259	19.9414	20.2851	20.2058	20.1815	20.0763	0.0965373	20.2241	0.0442264	0.147796	0.120391
HS105_MOUSE	Heat shock protein 105 kDa	HS105_MOUSE_Cys167	R.SVLDAAQIVGLNCLR.L	19.7815	19.7946	19.8286	19.9644	19.9099	19.9593	19.8015	0.0198446	19.9445	0.0245812	0.143014	0.00305734
HS105_MOUSE	Heat shock protein 105 kDa	HS105_MOUSE_Cys245	K.LVEHFCAEFK.T	17.2836	17.2584	17.0829	17.2716	17.3167	17.1875	17.2083	0.0892436	17.2586	0.0535245	0.0503011	0.531781
HS105_MOUSE	Heat shock protein 105 kDa	HS105_MOUSE_Cys310	R.SQFEELCAELLQK.I	17.2738	17.4062	17.4229	17.3254	17.5435	17.5519	17.3676	0.0667159	17.4736	0.104821	0.10597	0.294227
HS105_MOUSE	Heat shock protein 105 kDa	HS105_MOUSE_Cys376	R.GCALQCAILSPAFK.V	18.8852	18.4455	18.6471	19.1418	18.9124	19.0257	18.6593	0.179727	19.0266	0.0936622	0.367344	0.0624189
HS105_MOUSE	Heat shock protein 105 kDa	HS105_MOUSE_Cys380	R.GCALQCAILSPAFK.V	17.7967	17.5106	17.686	18.1433	17.8099	17.8544	17.6644	0.117809	17.9359	0.147819	0.271437	0.112108
HS105_MOUSE	Heat shock protein 105 kDa	HS105_MOUSE_Cys797	K.ELNNVCEPVVTQPKPK.I	17.0382	16.9817	16.9377	16.954	17.1049	17.2337	16.9859	0.0411207	17.0975	0.114317	0.111652	0.263541
HS90A_MOUSE	Heat shock protein HSP 90-alpha	HS90A_MOUSE_Cys482	R.YYTSASGDEMVSLKDYCTR.M	18.3745	18.1451	18.2891	18.5318	18.6091	18.5061	18.2695	0.0946688	18.549	0.0437958	0.279474	0.0192838
HS90A_MOUSE	Heat shock protein HSP 90-alpha	HS90A_MOUSE_Cys530	K.HGLEVIYMIEPIDEYCVQQLK.E	17.8121	17.5777	17.779	17.8664	18.1834	18.0328	17.7229	0.103579	18.0275	0.129462	0.304578	0.0601761
HS90A_MOUSE	Heat shock protein HSP 90-alpha	HS90A_MOUSE_Cys598	R.LVTSPCC#IVTSTYGWTANMER.I	16.6284	16.8776	17.2741	17.3417	17.3787	17.2031	16.9267	0.26587	17.3078	0.0756062	0.38112	0.122965
HS90A_MOUSE	Heat shock protein HSP 90-alpha	HS90A_MOUSE_Cys599	R.LVTSPC#CIVTSTYGWTANMER.I	18.2035	18.1157	18.206	18.2922	18.4179	18.4093	18.1751	0.0419743	18.3731	0.0573311	0.198069	0.016928
HS90B_MOUSE	Heat shock protein HSP 90-beta	HS90B_MOUSE_Cys366	R.VFIMDSCDELIPEYLNFIR.G	16.5796	16.4627	16.6103	16.8131	16.8462	16.6278	16.5509	0.0636103	16.7624	0.0961023	0.211502	0.0603413
HS90B_MOUSE	Heat shock protein HSP 90-beta	HS90B_MOUSE_Cys412	K.CLELFSELAEDKENYKK.F	16.2303	16.4087	16.124	16.3607	16.3667	16.0109	16.2543	0.117467	16.2461	0.166335	-0.00824446	0.957086
HS90B_MOUSE	Heat shock protein HSP 90-beta	HS90B_MOUSE_Cys521	R.GFEVVYMTEPIDEYCVQQLK.E	19.0133	18.9378	18.9216	19.1967	19.299	19.2809	18.9576	0.0399654	19.2589	0.0445683	0.301325	0.00205827
HS90B_MOUSE	Heat shock protein HSP 90-beta	HS90B_MOUSE_Cys564	K.AKFENLCK.L	23.1299	23.1503	23.0284	23.4047	23.2076	23.0316	23.1029	0.0533102	23.2146	0.152377	0.111754	0.383007
HS90B_MOUSE	Heat shock protein HSP 90-beta	HS90B_MOUSE_Cys589	R.LVSSPCCIVTSTYGWTANMER.I	18.5914	18.3862	18.8409	18.9723	18.8686	18.8844	18.6061	0.185934	18.9084	0.0456366	0.30229	0.0893186
HS90B_MOUSE	Heat shock protein HSP 90-beta	HS90B_MOUSE_Cys590	R.LVSSPC#CIVTSTYGWTANMER.I	18.6635	18.8017	18.8773	19.1539	18.5559	18.9602	18.7808	0.0885184	18.89	0.249153	0.109189	0.590566
HSP74_MOUSE	Heat shock 70 kDa protein 4	HSP74_MOUSE_Cys140	K.KPVVDCVVSVPSFYTDAER.R	18.8863	18.7563	18.7819	18.9213	19.0146	19.0797	18.8082	0.0561954	19.0052	0.0649958	0.197019	0.0315892
HSP74_MOUSE	Heat shock 70 kDa protein 4	HSP74_MOUSE_Cys167	R.SVMDATQIAGLNCLR.L	20.2111	20.0888	20.0005	20.1896	20.1788	20.0966	20.1002	0.0863529	20.155	0.0415111	0.0548434	0.46363
HSP74_MOUSE	Heat shock 70 kDa protein 4	HSP74_MOUSE_Cys417	R.WNSPAEEGLSDCEVFPK.N	18.9763	18.9452	19.0175	19.0423	19.0618	19.1514	18.9797	0.0295802	19.0851	0.0474916	0.105487	0.0560205
HSP74_MOUSE	Heat shock 70 kDa protein 4	HSP74_MOUSE_Cys780	K.ELTSICSPIISK.P	17.5292	17.8674	17.6222	17.8102	17.9981	17.7934	17.6729	0.142642	17.8673	0.0927884	0.194348	0.181572
HSP7C_MOUSE	Heat shock cognate 71 kDa protein	HSP7C_MOUSE_Cys17	K.GPAVGIDLGTTYSCVGVFQHGK.V	19.2374	19.0533	18.2743	18.3929	18.723	19.3306	18.855	0.417443	18.8155	0.388339	-0.0395519	0.926568
HSP7C_MOUSE	Heat shock cognate 71 kDa protein	HSP7C_MOUSE_Cys574	K.ILDKCNEIISWLDK.N	20.6695	20.8008	20.8645	20.869	20.6321	21.0016	20.7783	0.0811753	20.8343	0.152834	0.0559935	0.671003
HSP7C_MOUSE	Heat shock cognate 71 kDa protein	HSP7C_MOUSE_Cys603	K.VCNPIITK.L	20.5296	20.5886	20.5715	20.6264	20.5513	20.7007	20.5632	0.0247958	20.6261	0.0610071	0.0628842	0.248221
HXK1_MOUSE	Hexokinase-1	HXK1_MOUSE_Cys879	K.TVCGVVSK.R	20.4029	20.3907	20.2967	20.7752	20.6966	20.5622	20.3634	0.0474479	20.678	0.0879747	0.3146	0.0112367
HXK2_MOUSE	Hexokinase-2	HXK2_MOUSE_Cys794	K.FLSQIESDCLALLQVR.A	14.7047	14.5959	14.8589	15.1353	14.9562	15.0604	14.7198	0.107893	15.0506	0.073459	0.330845	0.0230727
HXK3_MOUSE	Hexokinase-3	HXK3_MOUSE_Cys780	K.TQCLQAR.D	17.2094	17.1107	17.0642	17.781	17.6887	17.5751	17.1281	0.060563	17.6816	0.0842015	0.553498	0.00165149
I2BP2_MOUSE	Interferon regulatory factor 2-binding protein 2	I2BP2_MOUSE_Cys65	R.AHGCFPEGR.S	13.3933	13.1578	13.2587	13.8205	13.7783	13.5612	13.2699	0.0964768	13.72	0.113585	0.450063	0.0129407
I5P2_MOUSE	Type II inositol 1,4,5-trisphosphate 5-phosphatase	I5P2_MOUSE_Cys280	R.CPEKPENSLTR.Q	16.7226	16.73	16.4142	16.7156	16.83	16.6526	16.6222	0.147138	16.7327	0.0734576	0.110478	0.39589
ICA_MOUSE	Inhibitor of carbonic anhydrase	ICA_MOUSE_Cys185	S.LCQLCAGK.G	23.2657	22.8932	22.8091	23.4156	23.7467	23.554	22.9893	0.198395	23.5721	0.135782	0.582759	0.0265824
ICA_MOUSE	Inhibitor of carbonic anhydrase	ICA_MOUSE_Cys188	S.LCQLCAGK.G	23.2657	22.8932	22.8091	23.4156	23.7467	23.554	22.9893	0.198395	23.5721	0.135782	0.582759	0.0265824
ICAM1_MOUSE	Intercellular adhesion molecule 1	ICAM1_MOUSE_Cys239	K.LFCSLEGLFPASEAR.I	16.0124	15.871	15.8195	16.163	16.2876	15.9745	15.901	0.0815352	16.1417	0.128712	0.240736	0.0891681
ICAM1_MOUSE	Intercellular adhesion molecule 1	ICAM1_MOUSE_Cys422	K.CQAWGNPSPK.M	17.8677	17.8044	17.8393	17.9694	17.9722	17.965	17.8371	0.0259015	17.9689	0.00296433	0.131758	0.00202737
IDHG1_MOUSE	Isocitrate dehydrogenase [NAD] subunit gamma 1, mitochondrial	IDHG1_MOUSE_Cys148	R.TSLDLYANVIHCK.S	13.9138	13.7287	13.5993	13.7777	13.5691	13.8831	13.7473	0.129056	13.7433	0.130473	-0.00393157	0.977281
IDHP_MOUSE	Isocitrate dehydrogenase [NADP], mitochondrial	IDHP_MOUSE_Cys154	R.NILGGTVFREPIICK.N	19.3644	19.2517	19.0779	19.1432	19.0843	19.143	19.2313	0.117832	19.1235	0.0276958	-0.107844	0.276168
IDHP_MOUSE	Isocitrate dehydrogenase [NADP], mitochondrial	IDHP_MOUSE_Cys235	H.SCFQYSIQK.K	19.2753	19.1871	19.2375	19.2031	19.5675	19.2499	19.2333	0.0361537	19.3401	0.161889	0.106851	0.41384
IDHP_MOUSE	Isocitrate dehydrogenase [NADP], mitochondrial	IDHP_MOUSE_Cys402	K.VCVQTVESGAMTK.D	19.3762	19.1545	19.283	19.3949	19.3072	19.425	19.2712	0.0908677	19.3757	0.0499621	0.104466	0.227364
IF2A_MOUSE	Eukaryotic translation initiation factor 2 subunit 1	IF2A_MOUSE_Cys218	R.AGLNCSTETMPIK.I	18.5324	18.6193	18.4999	18.8329	18.842	18.3344	18.5506	0.0504039	18.6698	0.237156	0.119191	0.525184
IF2G_MOUSE	Eukaryotic translation initiation factor 2 subunit 3, X-linked	IF2G_MOUSE_Cys269	R.SFDVNKPGCEVDDLKGGVAGGSILK.G	14.9521	14.8741	14.5309	15.4293	15.3463	15.3842	14.7857	0.182952	15.3866	0.0339057	0.6009	0.0102828
IF4B_MOUSE	Eukaryotic translation initiation factor 4B	IF4B_MOUSE_Cys543	K.VDVVGATQGQAGSCSR.G	18.7578	18.6146	18.4017	18.2366	18.2704	18.4705	18.5914	0.146297	18.3258	0.103187	-0.265538	0.103933
IF4E_MOUSE	Eukaryotic translation initiation factor 4E	IF4E_MOUSE_Cys170	K.IAIWTTECENR.D	18.9667	18.9384	18.9604	19.1021	19.1395	19.1991	18.9552	0.0121254	19.1469	0.0399544	0.191732	0.00289986
IF4G1_MOUSE	Eukaryotic translation initiation factor 4 gamma 1	IF4G1_MOUSE_Cys923	K.MLTEAIMHDCVVK.L	14.6844	13.95	14.1972	13.9799	14.5614	14.1632	14.2772	0.305101	14.2348	0.242745	-0.0423811	0.885269
IF5A1_MOUSE	Eukaryotic translation initiation factor 5A-1	IF5A1_MOUSE_Cys129	K.EIEQKYDCGEEILITVLSAMTEEAAVAIK.A	16.9598	13.5203	13.8061	16.1067	15.9651	15.8498	14.7621	1.55838	15.9739	0.105075	1.21177	0.334178
IMA3_MOUSE	Importin subunit alpha-3	IMA3_MOUSE_Cys122	K.SGILPILVHCLER.D	14.9403	15.1219	15.2599	14.9325	15.2808	15.1536	15.1074	0.130912	15.1223	0.143929	0.0149341	0.918785
IMB1_MOUSE	Importin subunit beta-1	IMB1_MOUSE_Cys158	K.ESTLEAIGYICQDIDPEQLQDK.S	14.6125	15.0703	14.0818	14.9468	15.0163	14.8938	14.5882	0.403916	14.9523	0.0501569	0.364104	0.274514
IMB1_MOUSE	Importin subunit beta-1	IMB1_MOUSE_Cys223	R.HFIMQVVCEATQC#PDTR.V	17.8473	17.6108	17.9214	17.7452	17.9314	18.0346	17.7932	0.132439	17.9037	0.119782	0.110569	0.430648
IMB1_MOUSE	Importin subunit beta-1	IMB1_MOUSE_Cys543	K.DCYPAVQK.T	21.5877	21.4336	21.5341	21.8476	21.8157	21.6499	21.5184	0.0638665	21.7711	0.0866543	0.252628	0.0294089
IMB1_MOUSE	Importin subunit beta-1	IMB1_MOUSE_Cys585	R.IQFNDLQSLLCATLQNVLR.K	16.1396	16.2373	16.3803	16.3295	16.4228	16.5464	16.2524	0.0988285	16.4329	0.0888475	0.180516	0.127127
IMB1_MOUSE	Importin subunit beta-1	IMB1_MOUSE_Cys667	K.NYAEYQVCLAAVGLVGDLCR.A	15.5147	15.6817	15.9373	16.2406	16.0585	16.289	15.7112	0.173756	16.1961	0.0992325	0.48484	0.0266161
IMB1_MOUSE	Importin subunit beta-1	IMB1_MOUSE_Cys678	K.NYAEYQVCLAAVGLVGDLCR.A	15.5147	15.6817	15.9373	16.2406	16.0585	16.289	15.7112	0.173756	16.1961	0.0992325	0.48484	0.0266161
IMB1_MOUSE	Importin subunit beta-1	IMB1_MOUSE_Cys689	R.ALQSNILPFCDEVMQLLLENLGNENVHR.S	15.4845	15.2582	15.8896	15.8926	15.4155	15.8242	15.5441	0.261206	15.7108	0.210639	0.166638	0.521206
IMPA1_MOUSE	Inositol monophosphatase 1	IMPA1_MOUSE_Cys183	K.LCSIPIHGIR.S	16.5318	16.5889	16.3946	16.4594	16.3755	16.52	16.5051	0.0815115	16.4516	0.0592533	-0.0534918	0.494587
INF2_MOUSE	Inverted formin-2	INF2_MOUSE_Cys778	K.AQLVLTACESLLTSQR.L	16.0987	15.6647	15.8981	16.4021	16.2085	16.0173	15.8872	0.177351	16.2093	0.157063	0.322145	0.12682
IPO4_MOUSE	Importin-4	IPO4_MOUSE_Cys871	K.QSCTVAEK.S	16.8988	17.0786	16.8798	16.9584	17.0814	16.9975	16.9524	0.0895676	17.0124	0.0512961	0.0600268	0.45702
IPO5_MOUSE	Importin-5	IPO5_MOUSE_Cys266	K.LCGDTNLNNMQR.Q	18.3905	18.4721	18.445	18.6877	18.6288	18.61	18.4359	0.0339402	18.6422	0.0330969	0.206273	0.00353849
IPO5_MOUSE	Importin-5	IPO5_MOUSE_Cys733	R.VAAAESMPLLLECAR.V	16.5774	16.372	16.801	16.867	16.7878	16.6978	16.5834	0.175186	16.7842	0.069092	0.200741	0.206165
IPO7_MOUSE	Importin-7	IPO7_MOUSE_Cys415	K.TMGFCYQILTEPNADPR.K	16.6055	16.7194	16.4646	17.0123	16.893	16.9482	16.5965	0.104215	16.9512	0.0487392	0.354646	0.0120679
IPO7_MOUSE	Importin-7	IPO7_MOUSE_Cys736	K.VLTGVAGEDAECHAAK.L	13.11	13.175	13.0959	12.7941	12.5003	13.2758	13.127	0.0344416	12.8567	0.319671	-0.270232	0.300335
IPO7_MOUSE	Importin-7	IPO7_MOUSE_Cys749	K.LLEVIILQCK.G	16.2589	16.683	16.2853	16.6137	16.7129	16.3426	16.4091	0.194001	16.5564	0.156505	0.147259	0.450438
IPO7_MOUSE	Importin-7	IPO7_MOUSE_Cys757	R.GIDQCIPLFVEAALER.L	15.4374	14.7663	15.4086	15.2834	15.5084	15.7225	15.2041	0.309798	15.5047	0.179279	0.300662	0.300575
IPYR_MOUSE	Inorganic pyrophosphatase	IPYR_MOUSE_Cys254	K.GISC#MNTTVSESPFKCDPDAAK.A	16.804	16.6257	16.4444	16.5656	16.5496	16.5516	16.6247	0.146806	16.5556	0.00711815	-0.0691332	0.542319
ITA5_MOUSE	Integrin alpha-5	ITA5_MOUSE_Cys925	R.CEFGPLHR.Q	15.1898	15.3364	15.2705	15.3611	15.4955	15.7688	15.2656	0.0599564	15.5418	0.169618	0.276181	0.0956972
ITA5_MOUSE	Integrin alpha-5	ITA5_MOUSE_Cys961	R.EYQPFSLQCEAVYEALK.M	16.8268	16.6303	16.7283	16.7847	16.8428	16.9279	16.7284	0.0802172	16.8518	0.0588004	0.123357	0.154292
ITAM_MOUSE	Integrin alpha-M	ITAM_MOUSE_Cys144	R.ECPQQESDIVFLIDGSGSINNIDFQK.M	13.8836	14.1831	14.3216	14.4967	14.5327	14.3439	14.1294	0.182795	14.4578	0.0818515	0.328353	0.0812692
ITAM_MOUSE	Integrin alpha-M	ITAM_MOUSE_Cys494	R.GGQVSVCPLPR.G	19.9827	19.8673	19.9484	20.0549	20.0027	19.9906	19.9328	0.0483516	20.016	0.0278881	0.0832562	0.10256
ITAM_MOUSE	Integrin alpha-M	ITAM_MOUSE_Cys638	R.SVFACQEQVLK.N	18.9957	18.6697	18.7249	18.7874	18.9195	18.6244	18.7967	0.142475	18.7771	0.1207	-0.0196503	0.888894
ITAM_MOUSE	Integrin alpha-M	ITAM_MOUSE_Cys721	K.LILPDCVDDSVSPIILR.L	18.7109	18.724	18.8445	19.0204	19.0608	18.7341	18.7598	0.0601311	18.9384	0.145417	0.17861	0.18372
ITAV_MOUSE	Integrin alpha-V	ITAV_MOUSE_Cys138	K.ILACAPLYHWR.T	15.7869	15.9457	16.3513	16.3538	16.1072	16.0358	16.028	0.23766	16.1656	0.136221	0.137649	0.516549
ITB1_MOUSE	Integrin beta-1	ITB1_MOUSE_Cys691	R.EKLPQPVQVDPVTHCKEK.D	16.8596	17.0359	16.7399	16.9667	16.2783	16.7771	16.8784	0.121596	16.674	0.290347	-0.204395	0.410431
ITB2_MOUSE	Integrin beta-2	ITB2_MOUSE_Cys192	K.LRNPCPNK.E	20.459	20.437	20.395	20.536	20.5602	20.6529	20.4303	0.0265407	20.583	0.0503621	0.15271	0.019208
ITB2_MOUSE	Integrin beta-2	ITB2_MOUSE_Cys287	R.CHLEDNMYK.R	18.3637	18.4183	18.4222	18.5291	18.7319	18.567	18.4014	0.0267232	18.6093	0.0880704	0.207932	0.0330559
ITB2_MOUSE	Integrin beta-2	ITB2_MOUSE_Cys550	R.YNSQVCGGSDR.G	14.8941	14.9782	15.0696	14.5942	14.5958	14.833	14.9807	0.0716991	14.6743	0.112221	-0.306307	0.0312912
ITB2_MOUSE	Integrin beta-2	ITB2_MOUSE_Cys558	R.GSCNCGK.C	15.7445	15.9619	16.0373	15.6375	15.8715	15.8638	15.9146	0.124117	15.7909	0.108531	-0.123628	0.348741
ITB2_MOUSE	Integrin beta-2	ITB2_MOUSE_Cys560	R.GSCNCGK.C	15.7445	15.9619	16.0373	15.6375	15.8715	15.8638	15.9146	0.124117	15.7909	0.108531	-0.123628	0.348741
ITB2_MOUSE	Integrin beta-2	ITB2_MOUSE_Cys583	R.STTGCLNAR.L	15.8461	15.8568	15.9004	15.7982	15.9574	15.8643	15.8678	0.0234958	15.8733	0.0653235	0.00554966	0.915433
K6PF_MOUSE	6-phosphofructokinase, muscle type	K6PF_MOUSE_Cys351	R.LPLMECVQVTK.D	16.6885	16.5237	16.589	17.0136	16.843	16.7002	16.6004	0.0677795	16.8523	0.128116	0.251896	0.0698564
K6PP_MOUSE	6-phosphofructokinase type C	K6PP_MOUSE_Cys122	R.LGITNLCVIGGDGSLTGANLFR.K	18.009	18.3683	18.3351	18.5242	18.5041	18.6028	18.2375	0.162107	18.5437	0.0425837	0.306224	0.0610809
K6PP_MOUSE	6-phosphofructokinase type C	K6PP_MOUSE_Cys342	R.MGVEAVIALLEATPETPACVVSLR.G	18.5097	18.0969	18.2744	18.2255	18.8323	18.4554	18.2937	0.169089	18.5044	0.250117	0.210716	0.3795
KCRB_MOUSE	Creatine kinase B-type	KCRB_MOUSE_Cys254	R.FCTGLTQIETLFK.S	17.7725	17.7878	17.6933	17.6045	17.8844	18.0391	17.7512	0.0413999	17.8426	0.179861	0.0914469	0.522102
KCRB_MOUSE	Creatine kinase B-type	KCRB_MOUSE_Cys283	K.NYEFMWNPHLGYILTCPSNLGTGLR.A	15.1068	14.7748	15.2665	15.5548	15.4597	15.0885	15.0494	0.204798	15.3677	0.201163	0.318273	0.19197
KDM3B_MOUSE	Lysine-specific demethylase 3B	KDM3B_MOUSE_Cys1193	R.LLCLHDPSNK.N	18.6623	18.6842	18.6449	18.85	18.9466	19.08	18.6638	0.0161032	18.9589	0.094293	0.29507	0.0120402
KLC2_MOUSE	Kinesin light chain 2	KLC2_MOUSE_Cys220	R.YEVAVPLCK.Q	19.2043	19.1808	19.2488	19.2406	19.2616	19.4006	19.2113	0.028165	19.3009	0.071012	0.0896388	0.172371
KPCD_MOUSE	Protein kinase C delta type	KPCD_MOUSE_Cys192	R.QCNAAIHKK.C	17.2037	17.1433	16.9809	17.3784	17.6582	17.5559	17.1093	0.0940653	17.5308	0.115581	0.421505	0.0161288
KPYM_MOUSE	Pyruvate kinase PKM	KPYM_MOUSE_Cys152	K.ITLDNAYMEKCDENILWLDYK.N	22.4309	22.6777	22.5767	22.7895	22.7086	22.6209	22.5617	0.101302	22.7063	0.0688423	0.144582	0.170358
KPYM_MOUSE	Pyruvate kinase PKM	KPYM_MOUSE_Cys31	H.AAMADTFLEHMCR.L	17.6556	17.7187	17.6998	17.8509	18.0086	17.8135	17.6914	0.0264628	17.891	0.0845282	0.199639	0.0332944
KPYM_MOUSE	Pyruvate kinase PKM	KPYM_MOUSE_Cys326	R.AGKPVICATQMLESMIKKPRPTR.A	22.4795	22.3132	22.3609	22.6472	22.6236	22.3522	22.3845	0.0699225	22.541	0.133834	0.156519	0.216551
KPYM_MOUSE	Pyruvate kinase PKM	KPYM_MOUSE_Cys358	R.AEGSDVANAVLDGADCIMLSGETAKGDYPLEAVR.M	19.3299	19.3348	19.4978	19.5858	19.6831	19.3805	19.3875	0.0780553	19.5498	0.126124	0.162339	0.196573
KPYM_MOUSE	Pyruvate kinase PKM	KPYM_MOUSE_Cys474	R.GIFPVLCK.D	24.6539	24.5075	24.501	24.7168	24.8326	24.5214	24.5541	0.0706297	24.6903	0.128445	0.136141	0.259298
KPYM_MOUSE	Pyruvate kinase PKM	KPYM_MOUSE_Cys49	R.NTGIICTIGPASR.S	23.1637	22.9406	22.776	23.1848	22.9664	23.0387	22.9601	0.158848	23.0633	0.0908217	0.103227	0.469654
LAMP1_MOUSE	Lysosome-associated membrane glycoprotein 1	LAMP1_MOUSE_Cys327	K.CNTEEHIFVSK.M	21.1315	21.0002	20.9108	21.1294	21.0376	21.3106	21.0142	0.0906489	21.1592	0.113426	0.145028	0.230652
LAR4B_MOUSE	La-related protein 4B	LAR4B_MOUSE_Cys682	K.EQKPSTVACGK.E	16.4512	16.577	16.6185	16.4752	16.4765	16.717	16.5489	0.0710971	16.5562	0.113699	0.00733968	0.942018
LASP1_MOUSE	LIM and SH3 domain protein 1	LASP1_MOUSE_Cys53	K.KPYCNAHYPK.Q	19.4562	19.3795	19.4477	19.9662	19.6977	19.8038	19.4278	0.0343341	19.8226	0.110397	0.394752	0.00846905
LDHA_MOUSE	L-lactate dehydrogenase A chain	LDHA_MOUSE_Cys131	K.YSPHCK.L	19.0717	19.0382	19.1154	19.0411	19.3068	19.1835	19.0751	0.0316094	19.1772	0.108575	0.102103	0.270725
LDHA_MOUSE	L-lactate dehydrogenase A chain	LDHA_MOUSE_Cys163	R.VIGSGCNLDSAR.F	20.2673	20.3207	20.3079	20.4649	20.498	20.3059	20.2986	0.0227789	20.423	0.0838496	0.124344	0.113003
LDHA_MOUSE	L-lactate dehydrogenase A chain	LDHA_MOUSE_Cys84	K.DYCVTANSK.L	22.2809	22.1766	22.0536	22.3523	22.3629	22.2364	22.1703	0.0929295	22.3172	0.0572927	0.146883	0.129829
LEG1_MOUSE	Galectin-1	LEG1_MOUSE_Cys43	K.DSNNLCLHFNPR.F	18.4832	18.413	18.5286	18.5943	18.7162	18.7468	18.4749	0.0475565	18.6857	0.0658861	0.210798	0.0214137
LEG1_MOUSE	Galectin-1	LEG1_MOUSE_Cys61	R.FNAHGDANTIVCNTK.E	19.9323	19.8054	20.0224	19.8013	19.7648	19.8399	19.92	0.0890164	19.802	0.030669	-0.118035	0.150918
LEG3_MOUSE	Galectin-3	LEG3_MOUSE_Cys187	R.VIVCNTK.Q	23.2786	23.2163	23.2137	23.2844	23.2684	23.4884	23.2362	0.0300117	23.347	0.100144	0.110839	0.208157
LETM1_MOUSE	LETM1 and EF-hand domain-containing protein 1, mitochondrial	LETM1_MOUSE_Cys378	K.ELQAACR.A	17.1695	17.1277	17.1508	17.3442	17.2666	17.2963	17.1493	0.0171078	17.3024	0.0319855	0.153053	0.00396131
LIMD1_MOUSE	LIM domain-containing protein 1	LIMD1_MOUSE_Cys303	K.GTTVSAPMVPSSASQGACPK.R	16.054	16.2675	16.08	16.1656	16.1392	16.2187	16.1338	0.0950801	16.1745	0.0330413	0.0406625	0.598365
LIMS1_MOUSE	LIM and senescent cell antigen-like-containing domain protein 1	LIMS1_MOUSE_Cys222	K.CEKPFLGHR.H	15.0875	14.9419	15.0026	15.4519	15.1195	15.4335	15.0107	0.0596888	15.3349	0.152543	0.324258	0.0488369
LIPL_MOUSE	Lipoprotein lipase	LIPL_MOUSE_Cys302	K.GLCLSCR.K	19.5996	19.4985	19.701	19.6131	19.7496	19.6159	19.5997	0.0826852	19.6596	0.0636895	0.0598494	0.462884
LIPL_MOUSE	Lipoprotein lipase	LIPL_MOUSE_Cys305	K.GLCLSCR.K	19.5996	19.4985	19.701	19.6131	19.7496	19.6159	19.5997	0.0826852	19.6596	0.0636895	0.0598494	0.462884
LIPL_MOUSE	Lipoprotein lipase	LIPL_MOUSE_Cys310	R.CNNLGYEINK.V	19.9516	19.9639	19.9167	19.6354	19.9025	19.7815	19.944	0.0199861	19.7731	0.109192	-0.170904	0.0950295
LIS1_MOUSE	Platelet-activating factor acetylhydrolase IB subunit alpha	LIS1_MOUSE_Cys252	R.MVRPNQDGTLIASCSNDQTVR.V	14.9244	15.3614	15.5593	15.3124	15.3279	15.6235	15.2817	0.26528	15.4213	0.143133	0.139596	0.548259
LMAN1_MOUSE	Protein ERGIC-53	LMAN1_MOUSE_Cys198	K.NNPAIVVIGNNGQINYDHQNDGATQALASCQR.D	16.8925	16.7444	16.8836	16.9338	17.0009	17.0446	16.8401	0.0678213	16.9931	0.0455544	0.152974	0.057104
LPP1_MOUSE	Lipid phosphate phosphohydrolase 1	LPP1_MOUSE_Cys40	R.GIFCNDDSIKYPYK.E	13.4136	13.7104	13.5908	13.359	14.0784	13.6958	13.5716	0.121937	13.711	0.293908	0.139451	0.568963
LPPRC_MOUSE	Leucine-rich PPR motif-containing protein, mitochondrial	LPPRC_MOUSE_Cys112	R.VFESTCSSGSPGSNQALLLLR.S	18.3252	18.282	18.1272	18.3327	18.4351	18.3817	18.2448	0.084988	18.3831	0.0418211	0.138366	0.107735
LPPRC_MOUSE	Leucine-rich PPR motif-containing protein, mitochondrial	LPPRC_MOUSE_Cys1321	R.DNDKVYSCSMK.S	17.0389	17.064	16.9692	17.3938	17.5916	17.2112	17.024	0.0400793	17.3989	0.155341	0.374833	0.0298147
LPPRC_MOUSE	Leucine-rich PPR motif-containing protein, mitochondrial	LPPRC_MOUSE_Cys207	R.LIAAYCNVGDIEGASK.I	17.9679	17.9653	17.9684	18.175	18.2627	18.1044	17.9672	0.00136742	18.1807	0.0647405	0.213491	0.00957151
LPPRC_MOUSE	Leucine-rich PPR motif-containing protein, mitochondrial	LPPRC_MOUSE_Cys847	K.GDLPAALEASIACHK.K	17.8236	17.748	17.7964	18.0587	18.0575	18.076	17.7893	0.0312786	18.0641	0.00844771	0.274738	0.000277136
LPPRC_MOUSE	Leucine-rich PPR motif-containing protein, mitochondrial	LPPRC_MOUSE_Cys862	R.IHDVLCK.L	16.1318	15.637	15.4181	16.2611	16.0098	16.4512	15.729	0.298514	16.2407	0.180764	0.511722	0.106779
LPXN_MOUSE	Leupaxin	LPXN_MOUSE_Cys199	R.SGLAYCSK.D	22.1424	21.8571	21.9461	22.2377	22.2779	22.2895	21.9819	0.119208	22.2684	0.0222065	0.286476	0.0288062
LPXN_MOUSE	Leupaxin	LPXN_MOUSE_Cys211	R.CAYCAAPITDK.V	18.577	18.1955	17.988	18.7103	18.8411	18.7973	18.2535	0.243941	18.7829	0.0543562	0.529411	0.0401112
LPXN_MOUSE	Leupaxin	LPXN_MOUSE_Cys214	R.CAYCAAPITDK.V	18.577	18.1955	17.988	18.7103	18.8411	18.7973	18.2535	0.243941	18.7829	0.0543562	0.529411	0.0401112
LPXN_MOUSE	Leupaxin	LPXN_MOUSE_Cys329	R.GTLCHDC#GQPITGR.C	18.1334	18.2228	18.0871	18.3594	18.489	18.2756	18.1478	0.0563319	18.3746	0.0877953	0.226875	0.0370823
LRC59_MOUSE	Leucine-rich repeat-containing protein 59	LRC59_MOUSE_Cys48	K.ATVLDLSCNK.L	18.0096	17.9651	17.9195	18.1992	18.2158	18.3935	17.9647	0.0368073	18.2695	0.0879424	0.304767	0.0106503
LRC59_MOUSE	Leucine-rich repeat-containing protein 59	LRC59_MOUSE_Cys59	K.LSTLPSDFCGLTHLVK.L	18.0975	17.7626	18.0271	18.1577	17.9762	18.3276	17.9624	0.144187	18.1539	0.143467	0.191461	0.253933
LRCH4_MOUSE	Leucine-rich repeat and calponin homology domain-containing protein 4	LRCH4_MOUSE_Cys454	R.AAGAGASAPSTQATCNGPPK.S	13.2771	12.9674	12.958	13.0464	13.1085	13.1014	13.0675	0.148253	13.0854	0.0277387	0.01797	0.87437
LRP1_MOUSE	Prolow-density lipoprotein receptor-related protein 1	LRP1_MOUSE_Cys1076	R.LDGLCIPLR.W	19.1812	19.2272	19.3505	19.407	19.2265	19.2213	19.2529	0.0714669	19.285	0.0863346	0.0320064	0.706971
LRP1_MOUSE	Prolow-density lipoprotein receptor-related protein 1	LRP1_MOUSE_Cys1564	R.TVSCACPHLMK.L	19.078	19.2399	19.1558	19.134	19.2261	19.1869	19.1579	0.0660919	19.1823	0.0377536	0.0244223	0.673526
LRP1_MOUSE	Prolow-density lipoprotein receptor-related protein 1	LRP1_MOUSE_Cys1566	R.TVSCACPHLMK.L	19.078	19.2399	19.1558	19.134	19.2261	19.1869	19.1579	0.0660919	19.1823	0.0377536	0.0244223	0.673526
LRP1_MOUSE	Prolow-density lipoprotein receptor-related protein 1	LRP1_MOUSE_Cys2661	K.GVLFQPCER.T	21.5159	21.3817	21.4448	21.4041	21.6231	21.3313	21.4475	0.054852	21.4528	0.124032	0.00533281	0.95832
LRP1_MOUSE	Prolow-density lipoprotein receptor-related protein 1	LRP1_MOUSE_Cys3295	R.QPDVPNHPCK.V	16.8535	16.8475	16.796	16.8974	16.76	16.8111	16.8324	0.0258155	16.8228	0.0567019	-0.00954957	0.838996
LRP1_MOUSE	Prolow-density lipoprotein receptor-related protein 1	LRP1_MOUSE_Cys3808	K.AAYCACR.S	19.7197	19.7163	19.7336	19.6845	19.6749	19.7133	19.7232	0.00746646	19.6909	0.0163488	-0.0323137	0.0638045
LRP1_MOUSE	Prolow-density lipoprotein receptor-related protein 1	LRP1_MOUSE_Cys3810	K.AAYCACR.S	19.7197	19.7163	19.7336	19.6845	19.6749	19.7133	19.7232	0.00746646	19.6909	0.0163488	-0.0323137	0.0638045
LRP1_MOUSE	Prolow-density lipoprotein receptor-related protein 1	LRP1_MOUSE_Cys808	R.MYDAQQQQVGTNKCR.V	16.6559	16.0034	16.1856	16.4098	16.0454	16.1553	16.2816	0.274903	16.2035	0.152641	-0.0781135	0.74307
LRRF1_MOUSE	Leucine-rich repeat flightless-interacting protein 1	LRRF1_MOUSE_Cys311	K.CEQQVQSQDQENTSDLK.N	12.9857	12.9782	12.8793	12.8697	13.1394	13.0069	12.9477	0.0484922	13.0053	0.110099	0.057631	0.535272
LRRF1_MOUSE	Leucine-rich repeat flightless-interacting protein 1	LRRF1_MOUSE_Cys571	K.KAATPAETCR.D	14.4051	14.2277	14.4567	14.1977	14.0379	14.2543	14.3632	0.0980403	14.1633	0.0916348	-0.199868	0.102922
LY9_MOUSE	T-lymphocyte surface antigen Ly-9	LY9_MOUSE_Cys626	K.EDSNTIYCSVQKPK.K	18.7293	18.3036	18.5462	18.727	18.707	18.8733	18.5264	0.17438	18.7691	0.0741324	0.242759	0.144239
LYZ1_MOUSE	Lysozyme C-1	LYZ1_MOUSE_Cys83	R.YWCNDGK.T	15.0241	14.8773	14.8029	13.3689	14.1614	14.3706	14.9014	0.0919194	13.967	0.431442	-0.934453	0.0401085
MANBA_MOUSE	Beta-mannosidase	MANBA_MOUSE_Cys153	R.SAVQYAECQSK.A	13.6653	13.7173	13.2296	13.5492	13.7567	13.7672	13.5374	0.218688	13.691	0.100367	0.153613	0.417664
MARK1_MOUSE	Serine/threonine-protein kinase MARK1	MARK1_MOUSE_Cys173	R.QIVSAVQYCHQK.C	18.3517	18.2551	18.3774	18.3198	18.2954	18.3322	18.328	0.0526378	18.3158	0.0152931	-0.0122638	0.767518
MAZ_MOUSE	Myc-associated zinc finger protein	MAZ_MOUSE_Cys394	K.VPCHVCGK.M	14.7748	15.1768	14.8667	14.8656	15.3172	15.1338	14.9395	0.172014	15.1055	0.185448	0.166099	0.405628
MAZ_MOUSE	Myc-associated zinc finger protein	MAZ_MOUSE_Cys397	K.VPCHVCGK.M	14.7748	15.1768	14.8667	14.8656	15.3172	15.1338	14.9395	0.172014	15.1055	0.185448	0.166099	0.405628
MBNL1_MOUSE	Muscleblind-like protein 1	MBNL1_MOUSE_Cys27	R.GTCSRPDTECK.F	14.3208	14.181	14.3652	14.2862	14.3246	14.5294	14.289	0.0784837	14.3801	0.106775	0.0910697	0.386138
MBNL1_MOUSE	Muscleblind-like protein 1	MBNL1_MOUSE_Cys34	R.GTCSRPDTECK.F	14.3208	14.181	14.3652	14.2862	14.3246	14.5294	14.289	0.0784837	14.3801	0.106775	0.0910697	0.386138
MBNL1_MOUSE	Muscleblind-like protein 1	MBNL1_MOUSE_Cys53	R.VIACFDSLK.G	21.0347	21.1218	21.0369	21.1509	21.0833	21.5111	21.0645	0.0405271	21.2484	0.187789	0.183954	0.247133
MCM2_MOUSE	DNA replication licensing factor MCM2	MCM2_MOUSE_Cys624	R.CTVIAAANPIGGR.Y	15.1304	15.1089	14.7576	15.2716	15.0865	15.1781	14.999	0.170909	15.1787	0.0755612	0.179764	0.245303
MCM2_MOUSE	DNA replication licensing factor MCM2	MCM2_MOUSE_Cys661	R.FDVLCVVR.D	19.6147	19.5154	19.6782	19.9231	19.9351	19.8658	19.6028	0.0670046	19.908	0.0302634	0.305261	0.00420185
MCM3_MOUSE	DNA replication licensing factor MCM3	MCM3_MOUSE_Cys250	K.GCYTSGTFR.T	19.8414	19.8179	19.8075	20.1196	20.1018	20.0853	19.8223	0.0141934	20.1023	0.0140194	0.279983	3.80199e-05
MCM4_MOUSE	DNA replication licensing factor MCM4	MCM4_MOUSE_Cys604	K.AGIICQLNAR.T	19.3344	19.2963	19.2377	19.3563	19.5424	19.4862	19.2894	0.0397475	19.4616	0.077905	0.172186	0.0496025
MCM5_MOUSE	DNA replication licensing factor MCM5	MCM5_MOUSE_Cys396	K.CSPIGVYTSGK.G	19.3475	19.4182	19.2955	19.7061	19.6131	19.609	19.3537	0.0502974	19.6427	0.0448078	0.289	0.0037267
MCM7_MOUSE	DNA replication licensing factor MCM7	MCM7_MOUSE_Cys566	R.YIAMCHER.Q	14.3843	14.5845	14.4242	14.4747	14.7159	14.3457	14.4643	0.0865431	14.5121	0.153432	0.0477719	0.720846
MCTS1_MOUSE	Malignant T-cell-amplified sequence 1	MCTS1_MOUSE_Cys113	K.FVLSGANIMCPGLTSPGAK.L	17.2753	17.3544	16.9653	17.3787	17.2718	17.3504	17.1983	0.167943	17.3336	0.0452185	0.135312	0.332985
MDHC_MOUSE	Malate dehydrogenase, cytoplasmic	MDHC_MOUSE_Cys137	K.VIVVGNPANTNCLTASK.S	17.3636	17.2198	17.3706	17.1646	17.1138	17.1596	17.318	0.069492	17.146	0.0228709	-0.172008	0.0292408
MDHM_MOUSE	Malate dehydrogenase, mitochondrial	MDHM_MOUSE_Cys212	K.TIIPLISQCTPK.V	20.2214	19.9826	20.065	20.2243	20.1743	20.2377	20.0897	0.0990352	20.2121	0.0272813	0.122418	0.167204
MDHM_MOUSE	Malate dehydrogenase, mitochondrial	MDHM_MOUSE_Cys285	K.ETECTYFSTPLLLGK.K	17.6262	17.5246	17.5128	17.532	17.6715	17.8291	17.5545	0.0508878	17.6775	0.121395	0.122994	0.256871
MDHM_MOUSE	Malate dehydrogenase, mitochondrial	MDHM_MOUSE_Cys89	K.GYLGPEQLPDCLK.G	19.9031	19.7958	19.6602	19.8811	20.0494	19.9382	19.7863	0.0993848	19.9562	0.0698857	0.1699	0.119124
MDHM_MOUSE	Malate dehydrogenase, mitochondrial	MDHM_MOUSE_Cys93	K.GCDVVVIPAGVPR.K	21.6854	21.7949	21.8178	21.6688	21.9101	21.9147	21.766	0.0577533	21.8312	0.114872	0.0651796	0.513051
MECR_MOUSE	Trans-2-enoyl-CoA reductase, mitochondrial	MECR_MOUSE_Cys169	K.DIPLQSAATLGVNPCTAYR.M	17.6719	17.3939	17.8121	17.7057	17.9889	18.0856	17.626	0.173777	17.9267	0.161222	0.300725	0.147243
METK2_MOUSE	S-adenosylmethionine synthase isoform type-2	METK2_MOUSE_Cys104	K.TCNVLVALEQQSPDIAQGVHLDR.N	16.3774	16.4803	16.487	16.6886	16.5187	16.8882	16.4482	0.0501751	16.6985	0.151035	0.250274	0.0902178
MIF_MOUSE	Macrophage migration inhibitory factor	MIF_MOUSE_Cys81	K.LLCGLLSDR.L	19.8168	19.7519	19.7182	19.8354	19.8235	19.925	19.7623	0.0409476	19.8613	0.0453295	0.099029	0.083613
MINP1_MOUSE	Multiple inositol polyphosphate phosphatase 1	MINP1_MOUSE_Cys331	R.SSCNLFQDIFLHLDK.A	17.1013	17.0483	17.323	17.5513	17.3547	17.4014	17.1575	0.118984	17.4358	0.0838376	0.278299	0.0538717
MK01_MOUSE	Mitogen-activated protein kinase 1	MK01_MOUSE_Cys38	R.YTNLSYIGEGAYGMVCSAYDNLNK.V	18.1724	18.1196	17.9795	18.2688	18.318	18.17	18.0905	0.0813818	18.2523	0.0615156	0.161759	0.0883837
MK03_MOUSE	Mitogen-activated protein kinase 3	MK03_MOUSE_Cys179	R.DLKPSNLLINTTCDLK.I	19.2958	18.7774	19.0831	18.9797	19.1234	18.9362	19.0521	0.212779	19.0131	0.0799776	-0.039041	0.820037
MOES_MOUSE	Moesin	MOES_MOUSE_Cys284	R.ILALCMGNHELYMR.R	19.0945	19.151	19.1285	19.3095	19.3641	19.3039	19.1247	0.0232256	19.3258	0.0271734	0.201181	0.00134991
MP2K1_MOUSE	Dual specificity mitogen-activated protein kinase kinase 1	MP2K1_MOUSE_Cys207	K.LCDFGVSGQLIDSMANSFVGTR.S	17.0826	17.0021	16.7851	17.4502	16.9175	17.4023	16.9566	0.125623	17.2566	0.24063	0.300058	0.193029
MP2K3_MOUSE	Dual specificity mitogen-activated protein kinase kinase 3	MP2K3_MOUSE_Cys227	K.TMDAGCKPYMAPER.I	16.8718	16.8296	16.9334	16.898	17.029	16.8064	16.8783	0.0426437	16.9111	0.0913884	0.0328722	0.668768
MP2K3_MOUSE	Dual specificity mitogen-activated protein kinase kinase 3	MP2K3_MOUSE_Cys29	R.ISCVSKPPVSNPTPPR.N	18.9222	18.9104	18.8321	19.0147	18.9559	18.8241	18.8882	0.0400027	18.9316	0.0796929	0.0433703	0.52936
MPRD_MOUSE	Cation-dependent mannose-6-phosphate receptor	MPRD_MOUSE_Cys133	K.GGDEYDNHCGKEQR.R	16.2955	16.1105	16.5291	16.4565	16.562	16.547	16.3117	0.171276	16.5218	0.0466046	0.210131	0.16941
MPRD_MOUSE	Cation-dependent mannose-6-phosphate receptor	MPRD_MOUSE_Cys146	R.RAVVMISCNR.H	20.4327	20.5943	20.5089	20.5278	20.4859	20.6269	20.512	0.0659986	20.5469	0.0591347	0.0348769	0.60747
MPRD_MOUSE	Cation-dependent mannose-6-phosphate receptor	MPRD_MOUSE_Cys33	K.SCDLVGEK.D	20.9104	20.8322	20.8681	21.0519	21.1461	21.0496	20.8702	0.0319679	21.0825	0.0449741	0.212298	0.00553865
MPRI_MOUSE	Cation-independent mannose-6-phosphate receptor	MPRI_MOUSE_Cys1220	R.EEGDNCQVKDPR.H	15.2254	15.0235	15.2179	15.2962	15.4876	15.3958	15.1556	0.0934593	15.3932	0.0781763	0.237583	0.0509777
MPRI_MOUSE	Cation-independent mannose-6-phosphate receptor	MPRI_MOUSE_Cys1275	K.AVSSCQEK.K	16.3431	16.1803	16.3502	16.1911	16.2671	16.3516	16.2912	0.0784844	16.2699	0.0655799	-0.0212453	0.783549
MPRI_MOUSE	Cation-independent mannose-6-phosphate receptor	MPRI_MOUSE_Cys1469	R.FTCSDNQVNSR.P	16.647	16.7062	16.707	16.8757	16.7292	16.7753	16.6867	0.0281008	16.7934	0.0611511	0.106688	0.0884316
MPRI_MOUSE	Cation-independent mannose-6-phosphate receptor	MPRI_MOUSE_Cys223	R.VCPAGTAACLLK.G	19.1309	19.1231	19.2041	19.1381	19.2824	19.1715	19.1527	0.0364791	19.1973	0.0616752	0.0446191	0.428259
MPRI_MOUSE	Cation-independent mannose-6-phosphate receptor	MPRI_MOUSE_Cys230	R.VCPAGTAACLLK.G	19.1309	19.1231	19.2041	19.1381	19.2824	19.1715	19.1527	0.0364791	19.1973	0.0616752	0.0446191	0.428259
MPRI_MOUSE	Cation-independent mannose-6-phosphate receptor	MPRI_MOUSE_Cys369	K.VSLCNNK.E	21.3988	21.1904	21.3216	21.4433	21.3949	21.489	21.3036	0.0860097	21.4424	0.0384096	0.138816	0.105531
MPRI_MOUSE	Cation-independent mannose-6-phosphate receptor	MPRI_MOUSE_Cys377	K.EAAVCQEK.K	17.2946	17.1849	17.2164	17.2162	17.3875	17.2846	17.232	0.046102	17.2961	0.0704139	0.064154	0.341709
MPRI_MOUSE	Cation-independent mannose-6-phosphate receptor	MPRI_MOUSE_Cys513	K.YFFINVCHR.V	16.1191	15.7689	15.9902	15.9222	15.881	16.1842	15.9594	0.144615	15.9958	0.134288	0.0363949	0.807118
MPRI_MOUSE	Cation-independent mannose-6-phosphate receptor	MPRI_MOUSE_Cys566	K.GHIQLSYTDGDDCGSDKK.I	14.131	13.8485	13.6269	13.9118	14.0794	14.2084	13.8688	0.20628	14.0665	0.121433	0.197727	0.307608
MPRI_MOUSE	Cation-independent mannose-6-phosphate receptor	MPRI_MOUSE_Cys823	R.YASACQMK.Y	19.0867	19.0129	18.8944	19.2546	19.3736	19.2364	18.998	0.0791908	19.2882	0.0608155	0.290187	0.0147309
MPRI_MOUSE	Cation-independent mannose-6-phosphate receptor	MPRI_MOUSE_Cys886	R.IHLVCGR.G	14.5802	13.5426	14.4792	14.4364	14.5367	14.8601	14.2006	0.467145	14.6111	0.180795	0.410468	0.31098
MPRI_MOUSE	Cation-independent mannose-6-phosphate receptor	MPRI_MOUSE_Cys964	K.TFVFNICGAMPACGTVAGK.P	17.5738	17.577	17.755	18.1673	18.0628	18.1014	17.6353	0.0846857	18.1105	0.0431635	0.475233	0.00211104
MPRI_MOUSE	Cation-independent mannose-6-phosphate receptor	MPRI_MOUSE_Cys970	K.TFVFNICGAMPACGTVAGK.P	17.5738	17.577	17.755	18.1673	18.0628	18.1014	17.6353	0.0846857	18.1105	0.0431635	0.475233	0.00211104
MSH2_MOUSE	DNA mismatch repair protein Msh2	MSH2_MOUSE_Cys843	R.HVIACAK.Q	17.8708	17.8272	17.7396	17.7736	17.9573	17.8962	17.8125	0.0545828	17.8757	0.0763902	0.063163	0.395266
MSTO1_MOUSE	Protein misato homolog 1	MSTO1_MOUSE_Cys164	R.SICVIHK.Y	17.4947	17.4513	17.3138	17.4667	17.5355	17.5207	17.4199	0.0771134	17.5076	0.0295805	0.0876938	0.207615
MT1_MOUSE	Metallothionein-1	MT1_MOUSE_Cys33	K.SCCSC#CPVGC#SK.C	20.1038	19.939	19.9491	20.0003	20.116	20.2885	19.9973	0.075411	20.135	0.118409	0.137654	0.237806
MT1_MOUSE	Metallothionein-1	MT1_MOUSE_Cys34	K.SC#CSC#CPVGCSK.C	20.3482	20.3475	20.4364	20.3691	20.3456	20.5432	20.3774	0.0417729	20.4193	0.0881425	0.0419238	0.576111
MT1_MOUSE	Metallothionein-1	MT1_MOUSE_Cys36	K.SC#CSCCPVGC#SK.C	18.4926	18.4445	18.3163	18.3588	18.475	18.6802	18.4178	0.0744312	18.5047	0.132891	0.0868692	0.465142
MT1_MOUSE	Metallothionein-1	MT1_MOUSE_Cys37	K.SC#CSCCPVGC#SK.C	20.9955	20.8703	20.8788	20.9327	20.9597	21.1908	20.9149	0.057125	21.0277	0.115846	0.112872	0.28414
MT1_MOUSE	Metallothionein-1	MT1_MOUSE_Cys41	K.SC#CSC#CPVGCSK.C	19.1825	19.082	19.1691	19.2338	19.0391	19.4024	19.1446	0.0445494	19.2251	0.148424	0.0805335	0.503136
MT1_MOUSE	Metallothionein-1	MT1_MOUSE_Cys44	K.CAQGCVCK.G	23.3696	23.3412	23.2707	23.29	23.2514	23.5051	23.3272	0.0415992	23.3488	0.111641	0.021675	0.80965
MT1_MOUSE	Metallothionein-1	MT1_MOUSE_Cys48	K.CAQGCVCK.G	22.1273	22.2401	22.1918	22.1734	22.145	22.408	22.1864	0.046181	22.2422	0.117852	0.0557392	0.567188
MT1_MOUSE	Metallothionein-1	MT1_MOUSE_Cys50	K.CAQGCVCK.G	21.9167	21.9606	21.9213	21.9089	21.8714	22.0909	21.9329	0.0197138	21.9571	0.0959022	0.0242001	0.7443
MT2_MOUSE	Metallothionein-2	MT2_MOUSE_Cys33	K.SCC#SC#CPVGC#AK.C	19.2341	18.8608	18.654	19.0977	19.0682	19.4468	18.9163	0.24007	19.2042	0.171962	0.28792	0.240027
MT2_MOUSE	Metallothionein-2	MT2_MOUSE_Cys34	K.SC#CSCCPVGC#AK.C	18.6128	18.5255	18.5424	18.6107	18.5283	18.7664	18.5603	0.0378081	18.6351	0.0986948	0.0748675	0.373131
MT2_MOUSE	Metallothionein-2	MT2_MOUSE_Cys36	K.SC#CSCCPVGC#AK.C	18.6128	18.5255	18.5424	18.6107	18.5283	18.7664	18.5603	0.0378081	18.6351	0.0986948	0.0748675	0.373131
MT2_MOUSE	Metallothionein-2	MT2_MOUSE_Cys37	K.SC#CSCCPVGC#AK.C	19.9567	19.7029	19.5993	19.8746	19.8234	20.1464	19.753	0.150135	19.9481	0.14172	0.195168	0.25223
MT2_MOUSE	Metallothionein-2	MT2_MOUSE_Cys44	K.CSQGC#ICK.E	21.3915	21.4634	21.3521	21.4857	21.4547	21.7166	21.4023	0.04607	21.5523	0.11684	0.150009	0.166465
MT2_MOUSE	Metallothionein-2	MT2_MOUSE_Cys50	K.CSQGC#ICK.E	20.52	20.7038	20.6122	20.7075	20.5944	20.8401	20.612	0.0750636	20.714	0.100417	0.101978	0.314101
MTPN_MOUSE	Myotrophin	MTPN_MOUSE_Cys45	R.KPLHYAADCGQLEILEFLLLK.G	16.3382	16.2722	16.8618	16.2197	16.2922	16.3437	16.4907	0.263774	16.2852	0.0508422	-0.205508	0.340157
MVP_MOUSE	Major vault protein	MVP_MOUSE_Cys59	R.HYCIVANPVSR.D	14.7909	15.1873	15.0613	15.0426	15.3806	15.3702	15.0132	0.165385	15.2645	0.15693	0.25128	0.194075
MYO1E_MOUSE	Unconventional myosin-Ie	MYO1E_MOUSE_Cys579	K.CTPHYIR.C	15.76	15.6368	15.6391	15.9097	16.0405	15.8986	15.6786	0.0575327	15.9496	0.0644211	0.271004	0.0113577
[truncated: 617 more rows]

## Sheet: Table S3
Supplemental Table S3: The identified SSG-sites with treatment by CoO ENPs
[truncated: 1,337 more rows]

## Sheet: Table S4
Supplemental Table S4: Protein IDs from total protein abundance profiling experiments with treatment by CoO ENPs
[truncated: 1,407 more rows]

[truncated: 8 more sheets: Table S5, Table S6, Table S7, Table S8, Table S9, Table S10, Table S11, Table S12]
